# Supplementary material
Source: PubMed Central journal article supplement (PMC6437529)
Supplement: AAC.01814-18-s0001.pdf [file AAC.01814-18-s0001.pdf]

1 **Supplementary Material – Karlowsky *et al*, “*In vitro* activity of ceftazidime-avibactam**  
2 **against clinical isolates of *Enterobacteriaceae* and *Pseudomonas aeruginosa* collected in**  
3 **Latin American countries: Results from the INFORM Global Surveillance Program, 2012–**  
4 **2015”**

5

6 **Figure S1A.** Distribution of genes encoding  $\beta$ -lactamase enzyme types among 2,321 molecularly  
7 characterized *Enterobacteriaceae* isolates collected in Latin American countries from 2012–  
8 2015

9

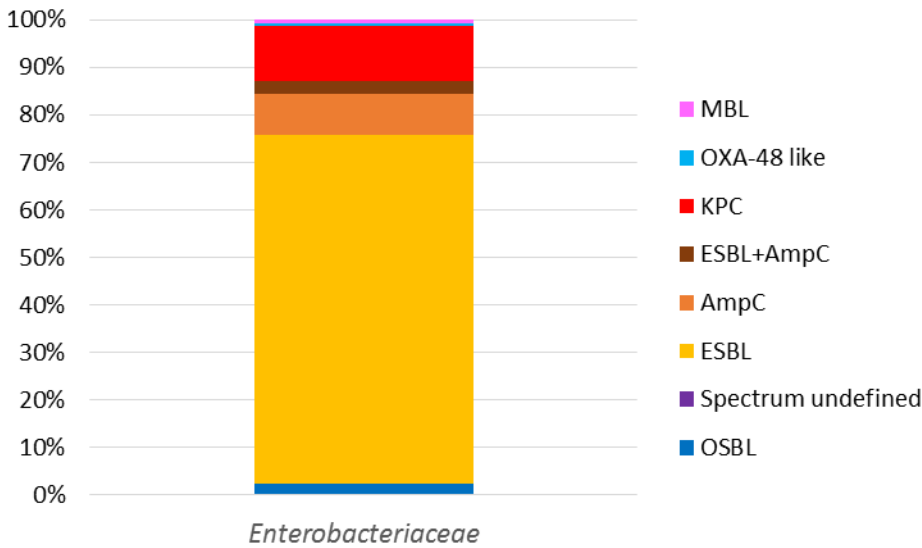

10  
11

12 The  $\beta$ -lactamase content of each subset is described in the footnote to Table 2; includes intrinsic  
13 and acquired  $\beta$ -lactamases. OSBL, original-spectrum  $\beta$ -lactamase (e.g. TEM-1, SHV-1, SHV-  
14 11); Spectrum undefined, SHV-type and/or TEM-type  $\beta$ -lactamases with undefined spectrum of  
15 activity; ESBL, extended-spectrum  $\beta$ -lactamase; MBL, metallo- $\beta$ -lactamase.

16 **Figure S1B.** Distribution of genes encoding acquired extended-spectrum  $\beta$ -lactamases (ESBLs)  
 17 in molecularly characterized isolates of *Enterobacteriaceae* collected in Latin American  
 18 countries  
 19

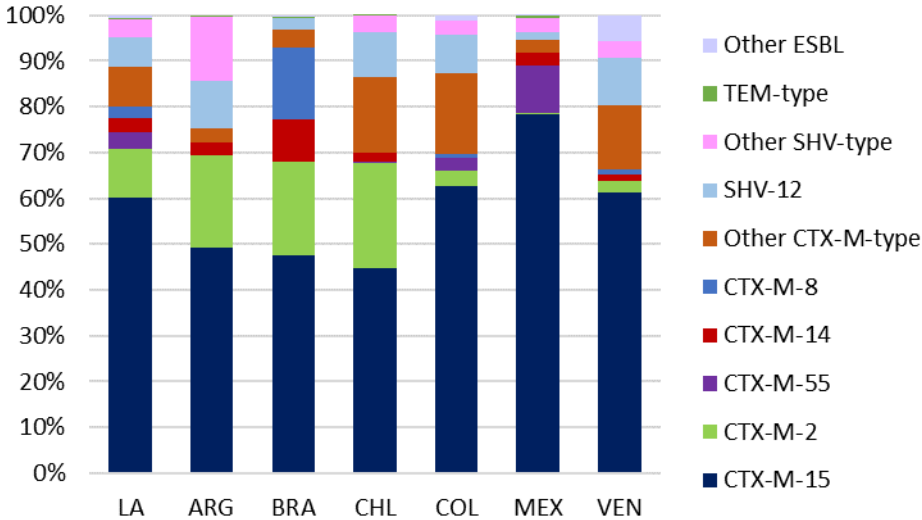

20  
 21  
 22 **Region/Country (no. of ESBL genes detected | no. of ESBL-producing isolates):** LA, Latin  
 23 America (2,025 | 1,897); ARG, Argentina (231 | 212); BRA, Brazil (290 | 278); CHL, Chile (432  
 24 | 374); COL, Colombia (182 | 171); MEX, Mexico (630 | 618); VEN, Venezuela (268 | 244).  
 25

26 **ESBL subtypes identified (total no. of genes):** CTX-M-15 (1,217), CTX-M-2 (219), CTX-M-  
 27 55 (72), CTX-M-14 (64), CTX-M-8 (50), CTX-M-3 (42), CTX-M-1 (30), CTX-M-12 (23),  
 28 CTX-M-32 (13), CTX-M-27 (10), CTX-M-65 (10), CTX-M-30 (9), CTX-M-79 (8), CTX-M-136  
 29 (6), CTX-M-9 (5), CTX-M-124 (5), CTX-M-116 (4), CTX-M-13 (1), CTX-M-24 (1), CTX-M-  
 30 28 (1), CTX-M-29 (1), CTX-M-59 (1), CTX-M-67 (1), CTX-M-75 (1), CTX-M-104 (1), CTX-  
 31 M-165 (1), CTX-M-TYPE (1); SHV-12 (129), SHV-5 (44), SHV-2 (14), SHV-2A (8), SHV-7  
 32 (6), SHV-31 (3), SHV-28 (2), SHV-41 (2), SHV-55 (2), SHV-18 (1); TEM-4 (2), TEM-15 (1),  
 33 TEM-28 (1), TEM-52 (1), TEM-93 (1); OXA-163\* (11), PER-1 (3), and GES-7 (1).  
 34

35 \*Also possesses weak carbapenemase activity that impacts the activity of carbapenems when  
 36 combined with additional mechanisms of resistance such as porin deficiencies (Oueslati S,  
 37 Nordmann P, Poirel L. 2015. J Antimicrob Chemother 70:1059-1063).

38 **Figure S1C.** Distribution of genes encoding acquired AmpC  $\beta$ -lactamases in molecularly  
 39 characterized isolates of *Enterobacteriaceae* collected in Latin American countries  
 40

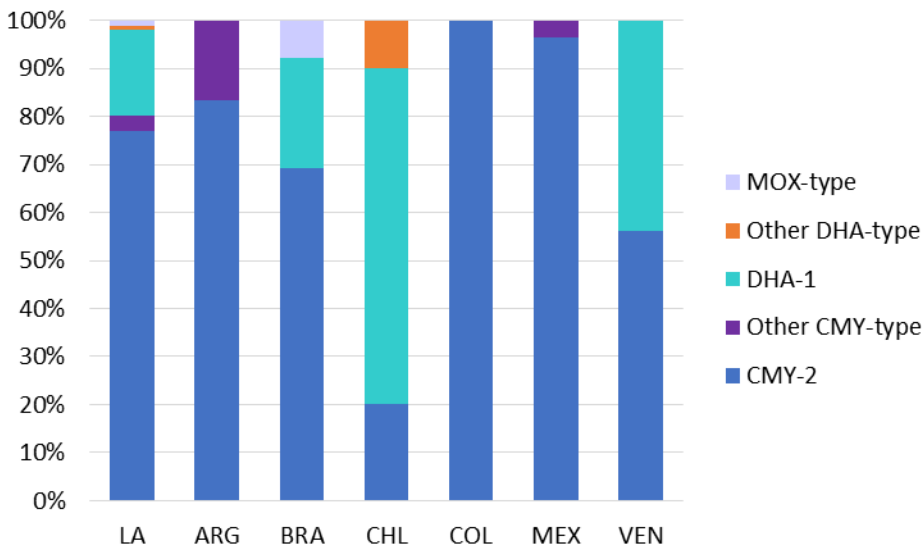

41  
 42  
 43 **Region/Country (no. of AmpC genes detected | no. of AmpC-producing isolates):** LA, Latin  
 44 America (96 | 96); ARG, Argentina (12 | 12); BRA, Brazil (13 | 13); CHL, Chile (10 | 10); COL,  
 45 Colombia (17 | 17); MEX, Mexico (28 | 28); VEN, Venezuela (16 | 16).

46  
 47 **AmpC subtypes identified (total no. of genes):** CMY-2 (74), CMY-TYPE (2), CMY-132 (1);  
 48 DHA-1 (17), DHA-6 (1); and MOX-TYPE (1).

49 **Figure S1D.** Distribution of genes encoding acquired carbapenemases in molecularly  
 50 characterized isolates of *Enterobacteriaceae* collected in Latin American countries  
 51

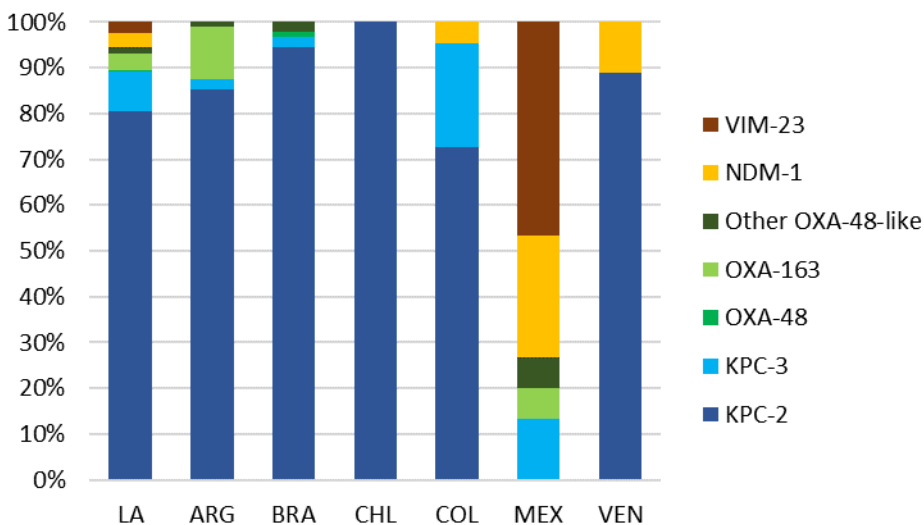

52  
 53  
 54 **Region/Country (no. of carbapenemase genes detected | no. of carbapenemase-producing**  
 55 **isolates):** LA, Latin America (302 | 300); ARG, Argentina<sup>a</sup> (88 | 87); BRA, Brazil<sup>a</sup> (92 | 91);  
 56 CHL, Chile (1 | 1); COL, Colombia (88 | 88); MEX, Mexico (15 | 15); VEN, Venezuela (18 | 18).

57  
 58 **Carbapenemase subtypes identified (total no. of genes):** KPC-2 (243), KPC-3 (26); OXA-48  
 59 (1), OXA-163<sup>b</sup> (11), OXA-232 (1), OXA-370 (2), OXA-439<sup>c</sup> (1); NDM-1 (10), and VIM-23 (7).

60  
 61 <sup>a</sup> Includes one isolate carrying KPC-2 and OXA-163 (Argentina) and one isolate carrying KPC-2  
 62 and OXA-370 (Brazil).

63 <sup>b</sup> Possesses weak carbapenemase activity that impacts the activity of carbapenems when  
 64 combined with additional mechanisms of resistance such as porin deficiencies (Oueslati S,  
 65 Nordmann P, Poirel L. 2015. J Antimicrob Chemother 70:1059-1063).

66 <sup>c</sup> Has not been confirmed to possess carbapenemase activity.

67 **Figure S2.** Percentages of *Enterobacteriaceae* isolates collected in 2012–2015 that were  
68 ceftazidime non-susceptible, by Latin American country.<sup>a</sup>

69

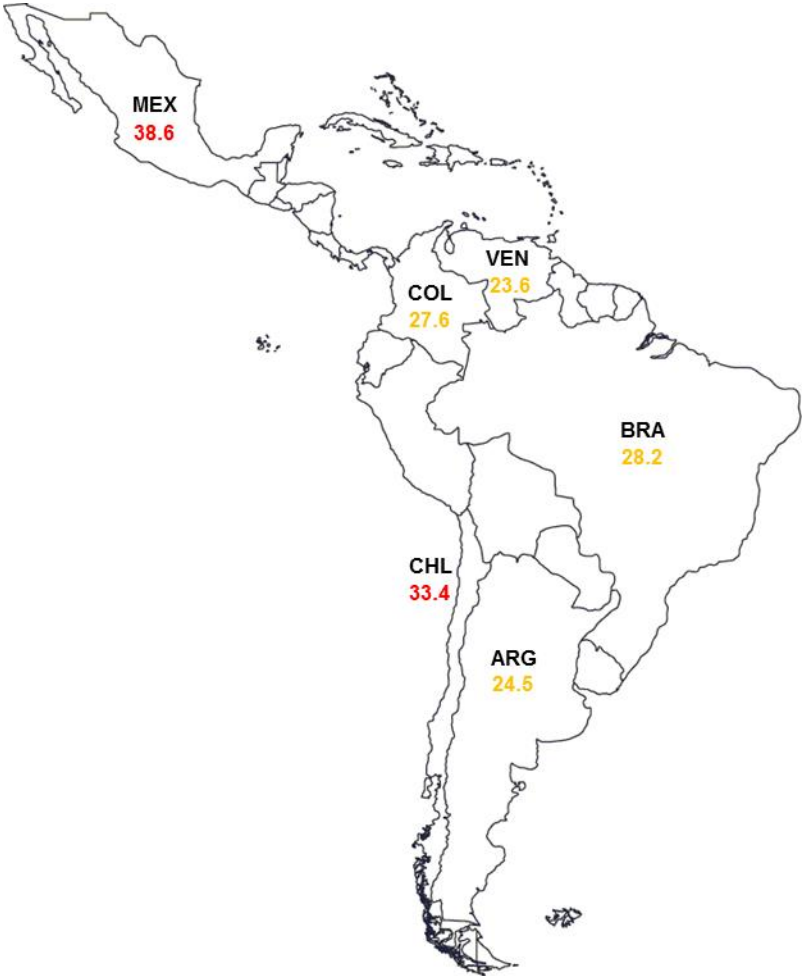

70

71 <sup>a</sup>Ceftazidime non-susceptible (CAZ-NS),  $\geq 8$  mg/L by CLSI 2016 criteria. Green font,  $< 20\%$  of  
72 tested isolates were CAZ-NS; orange font,  $20\text{--}29.9\%$  of isolates were CAZ-NS; red font,  $> 30\%$   
73 of isolates were CAZ-NS.

74 ARG, Argentina; BRA, Brazil; CHL, Chile; COL, Colombia; MEX, Mexico; VEN, Venezuela.

75 **Figure S3.** Percentages of *Enterobacteriaceae* isolates collected in 2012–2015 that were  
76 meropenem non-susceptible, by Latin American country.<sup>a</sup>

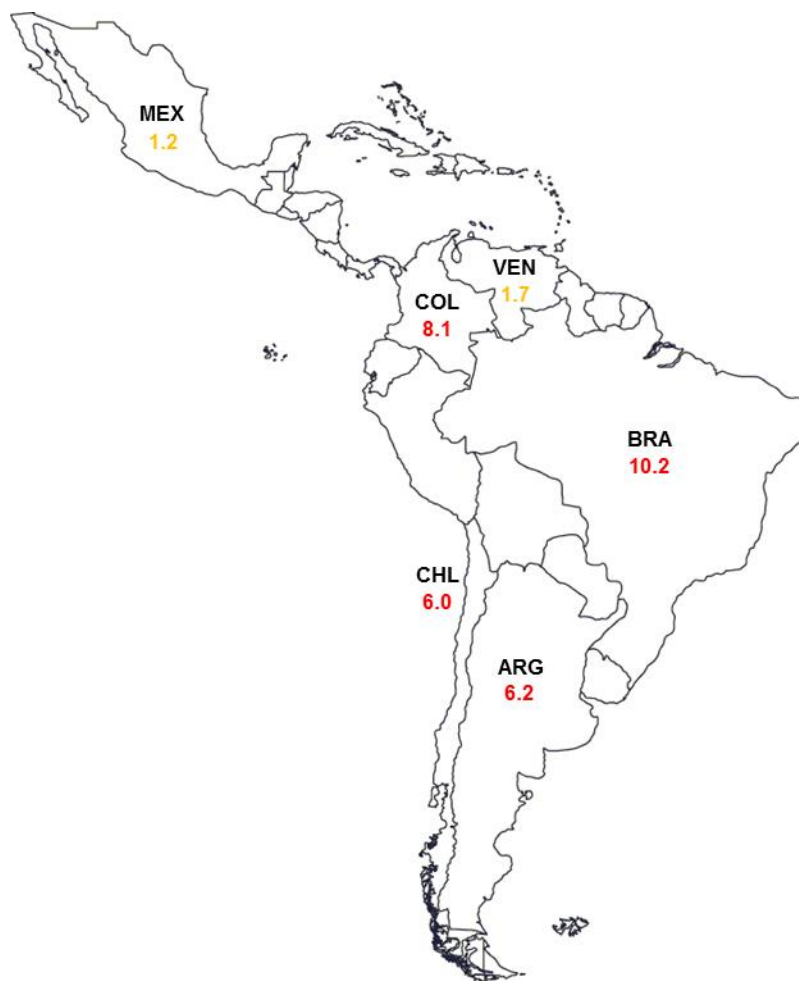

77  
78 <sup>a</sup>Meropenem non-susceptible (MEM-NS),  $\geq 2$  mg/L by CLSI 2016 criteria. Green font,  $< 1\%$  of  
79 tested isolates were MEM-NS; orange font, 1–1.9% of isolates were MEM-NS; red font,  $\geq 2\%$  of  
80 isolates were MEM-NS.  
81 ARG, Argentina; BRA, Brazil; CHL, Chile; COL, Colombia; MEX, Mexico; VEN, Venezuela.

82 **Figure S4.** Percentages of *Enterobacteriaceae* isolates collected in 2014–2015 that were colistin-  
83 resistant, by Latin American country.<sup>a</sup>

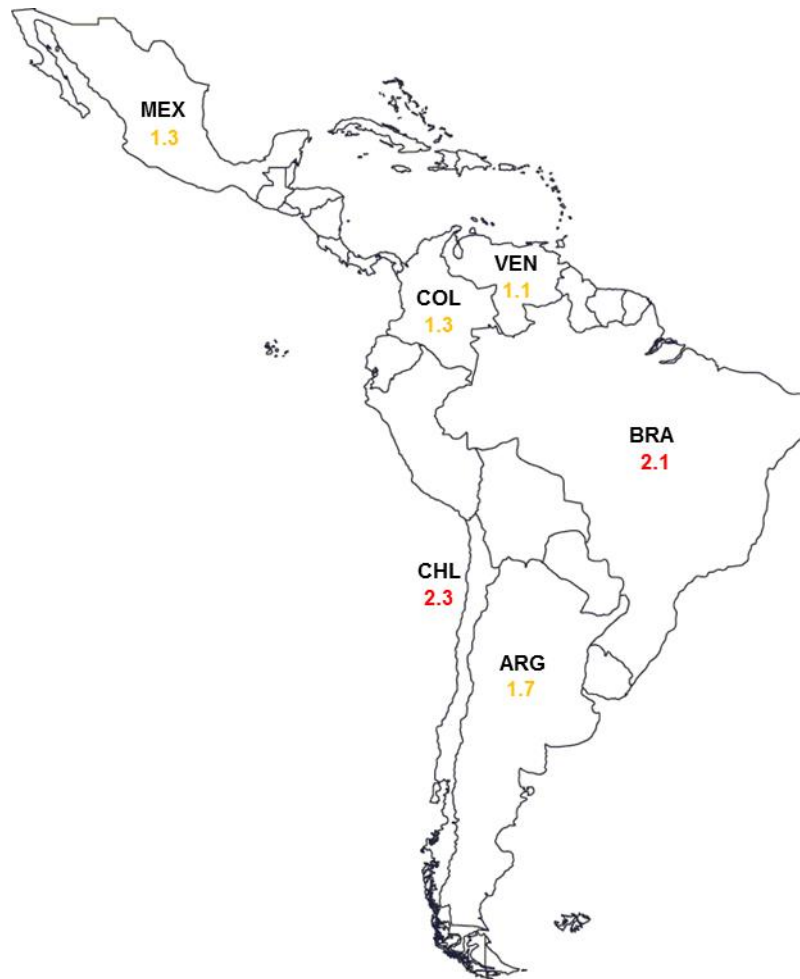

84

85 <sup>a</sup>Colistin-resistant (CST-R),  $\geq 4$  mg/L by EUCAST 2016 criteria. Green font, <1% of tested  
86 isolates were CST-R; orange font, 1–1.9% of isolates were CST-R; red font,  $\geq 2\%$  of isolates  
87 were CST-R. Excludes isolates of *Proteaceae* and *Serratia* spp., which are intrinsically resistant to  
88 colistin.

89 ARG, Argentina; BRA, Brazil; CHL, Chile; COL, Colombia; MEX, Mexico; VEN, Venezuela.

90 **Figure S5A.** Distribution of genes encoding  $\beta$ -lactamase enzyme types among 750 molecularly  
 91 characterized carbapenem non-susceptible *P. aeruginosa* isolates collected in Latin American  
 92 countries from 2012–2015

93

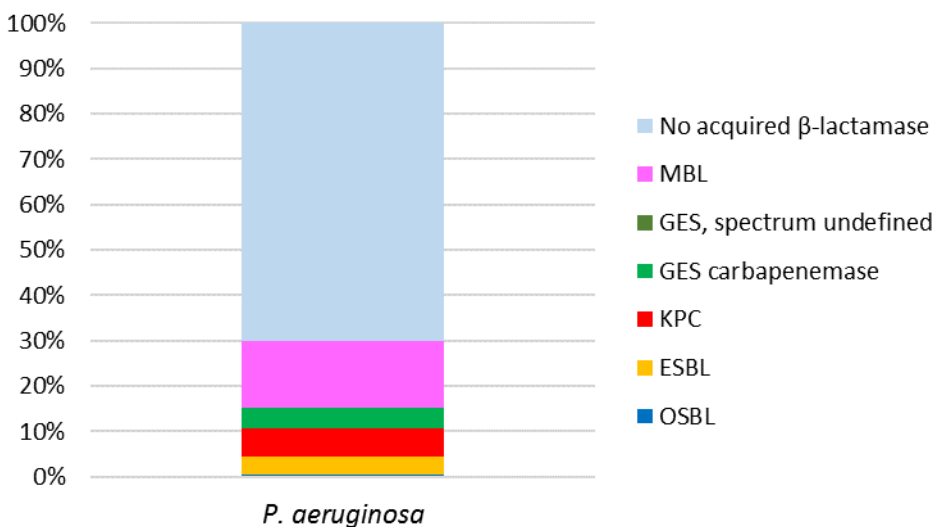

94  
 95

96  $\beta$ -lactamase content of each subset is described in the footnote to Table 2; includes intrinsic and  
 97 acquired  $\beta$ -lactamases. OSBL, original-spectrum  $\beta$ -lactamase (e.g. TEM-1, SHV-1, SHV-11);  
 98 ESBL, extended-spectrum  $\beta$ -lactamase; GES, spectrum undefined,  $\beta$ -lactamase with undefined  
 99 spectrum of activity (ESBL or carbapenemase); MBL, metallo- $\beta$ -lactamase.



100 **Figure S5B.** Distribution of genes encoding acquired extended-spectrum  $\beta$ -lactamases (ESBLs)  
 101 in molecularly characterized carbapenem non-susceptible isolates of *P. aeruginosa* collected in  
 102 Latin American countries  
 103

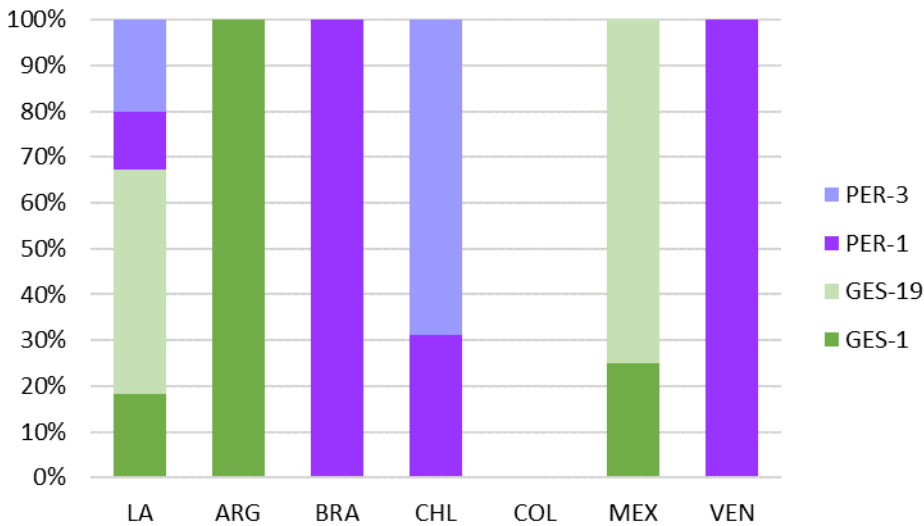

104  
 105  
 106 **Region/Country (no. of ESBL genes detected | no. of ESBL-producing isolates):** LA, Latin  
 107 America (55 | 55); ARG, Argentina (1 | 1); BRA, Brazil (1 | 1); CHL, Chile (16 | 16); COL,  
 108 Colombia (0 | 0); MEX, Mexico (36 | 36); VEN, Venezuela (1 | 1).

109  
 110 **ESBL subtypes identified (total no. of genes):** GES-1 (10), GES-19 (27), PER-1 (7), and PER-  
 111 3 (11).

112 **Figure S5C.** Distribution of genes encoding acquired carbapenemases in molecularly  
 113 characterized carbapenem non-susceptible isolates of *P. aeruginosa* collected in Latin American  
 114 countries  
 115

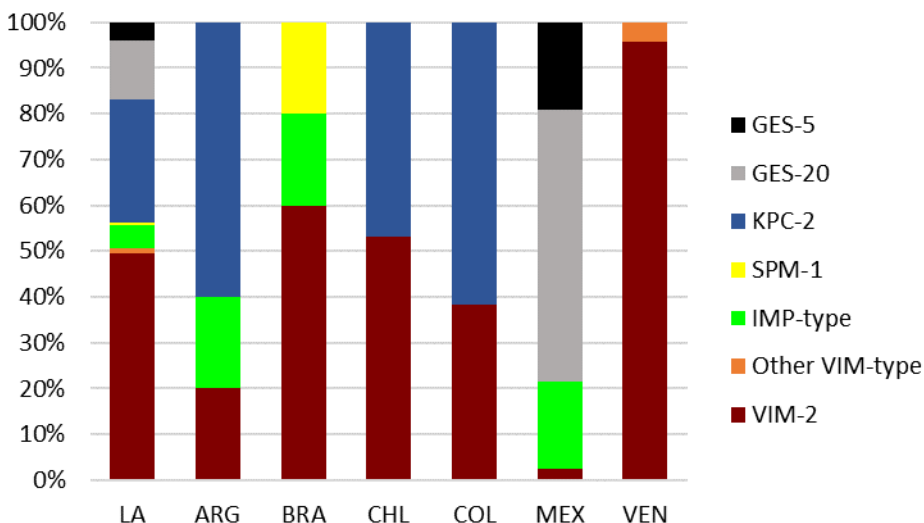

116  
 117  
 118 **Region/Country (no. of carbapenemase genes detected | no. of carbapenemase-producing**  
 119 **isolates):** LA, Latin America (196 | 191); ARG, Argentina (5 | 5); BRA, Brazil (5 | 5); CHL,  
 120 Chile<sup>a</sup> (62 | 57); COL, Colombia (34 | 34); MEX, Mexico (42 | 42); VEN, Venezuela (48 | 48).

121  
 122 **Carbapenemase subtypes identified (total no. of genes):** VIM-2 (97), VIM-50 (2); IMP-15 (4),  
 123 IMP-1 (2), IMP-18 (2), IMP-16 (1), IMP-49 (1); SPM-1 (1); KPC-2 (53); GES-20<sup>b</sup> (25), and  
 124 GES-5<sup>b</sup> (8).

125  
 126 <sup>a</sup> Five isolates collected in Chile co-carried VIM-2 and KPC-2.

127 <sup>b</sup> Twenty-four isolates co-carried GES-20 and GES-19, and two isolates co-carried GES-5 and  
 128 GES-1.

129 **Figure S6.** Percentages of *P. aeruginosa* isolates collected in 2012–2015 that were ceftazidime  
130 non-susceptible, by Latin American country.<sup>a</sup>

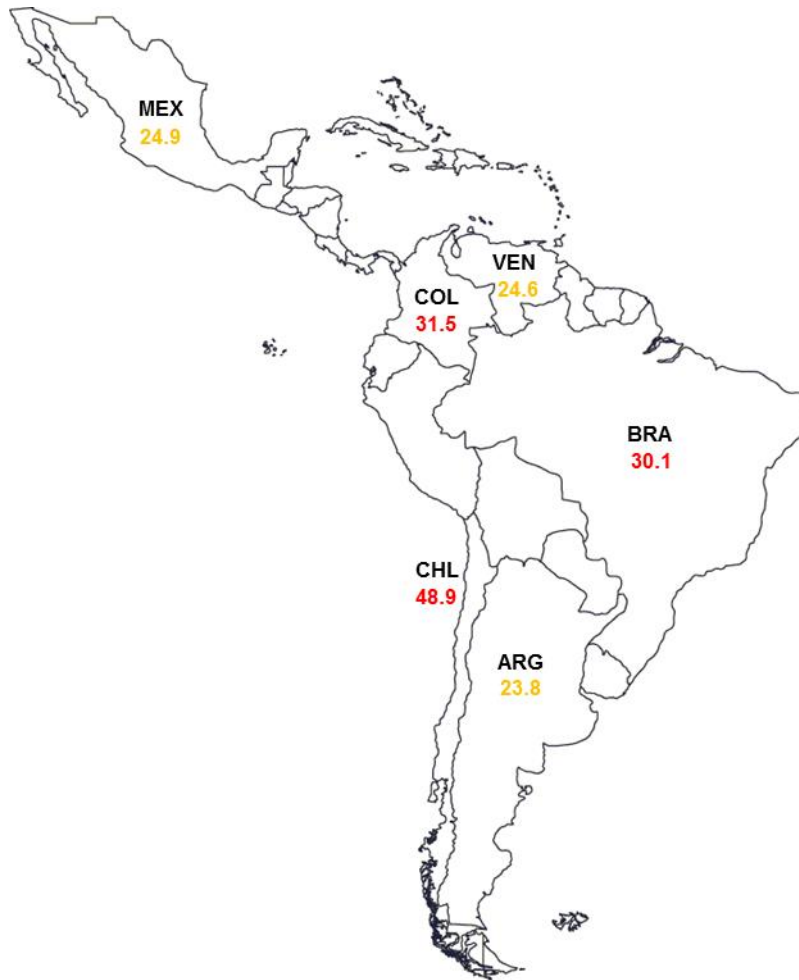

131  
132 <sup>a</sup>Ceftazidime non-susceptible (CAZ-NS),  $\geq 16$  mg/L by CLSI 2016 criteria. Green font,  $< 20\%$  of  
133 tested isolates were CAZ-NS; orange font, 20-29.9% of isolates were CAZ-NS; red font,  $> 30\%$   
134 of isolates were CAZ-NS.

135 ARG, Argentina; BRA, Brazil; CHL, Chile; COL, Colombia; MEX, Mexico; VEN, Venezuela.

136 **Figure S7.** Percentages of *P. aeruginosa* isolates collected in 2012–2015 that were meropenem  
137 non-susceptible, by Latin American country.<sup>a</sup>

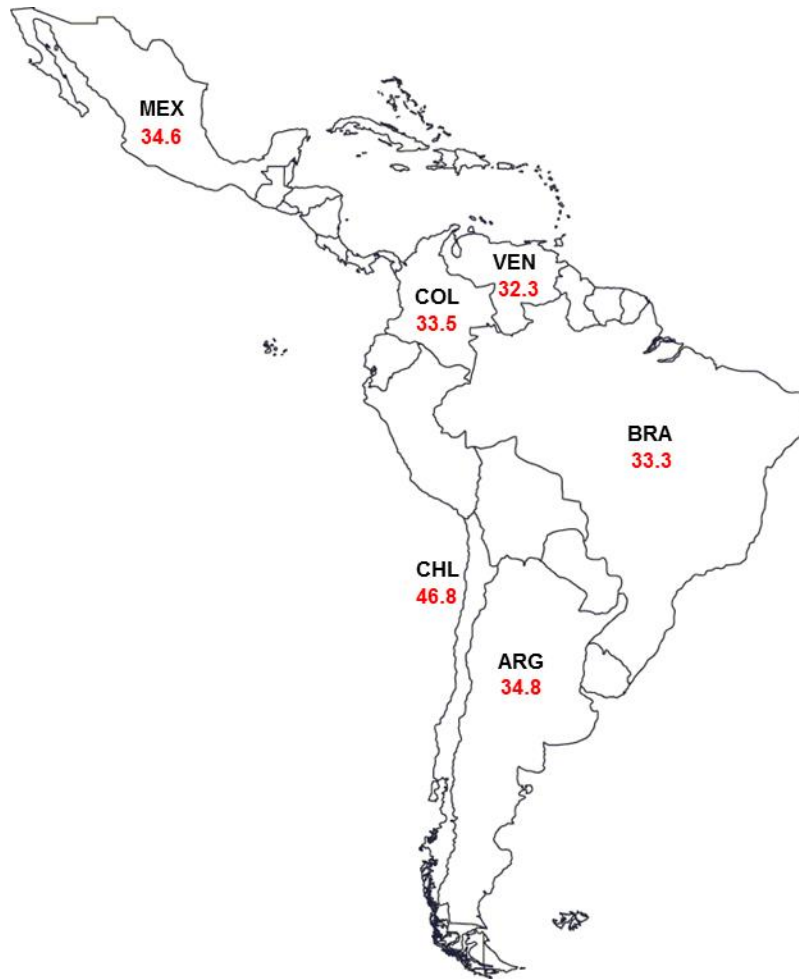

138  
139 <sup>a</sup>Meropenem non-susceptible (MEM-NS),  $\geq 4$  mg/L by CLSI 2016 criteria. Green font,  $< 20\%$  of  
140 tested isolates were MEM-NS; orange font,  $20\text{--}29.9\%$  of isolates were MEM-NS; red font,  $\geq 30\%$   
141 of isolates were MEM-NS.  
142 ARG, Argentina; BRA, Brazil; CHL, Chile; COL, Colombia; MEX, Mexico; VEN, Venezuela.

143 **Figure S8.** Percentages of *P. aeruginosa* isolates collected in 2014–2015 that were colistin-  
144 resistant, by Latin American country.<sup>a</sup>

145

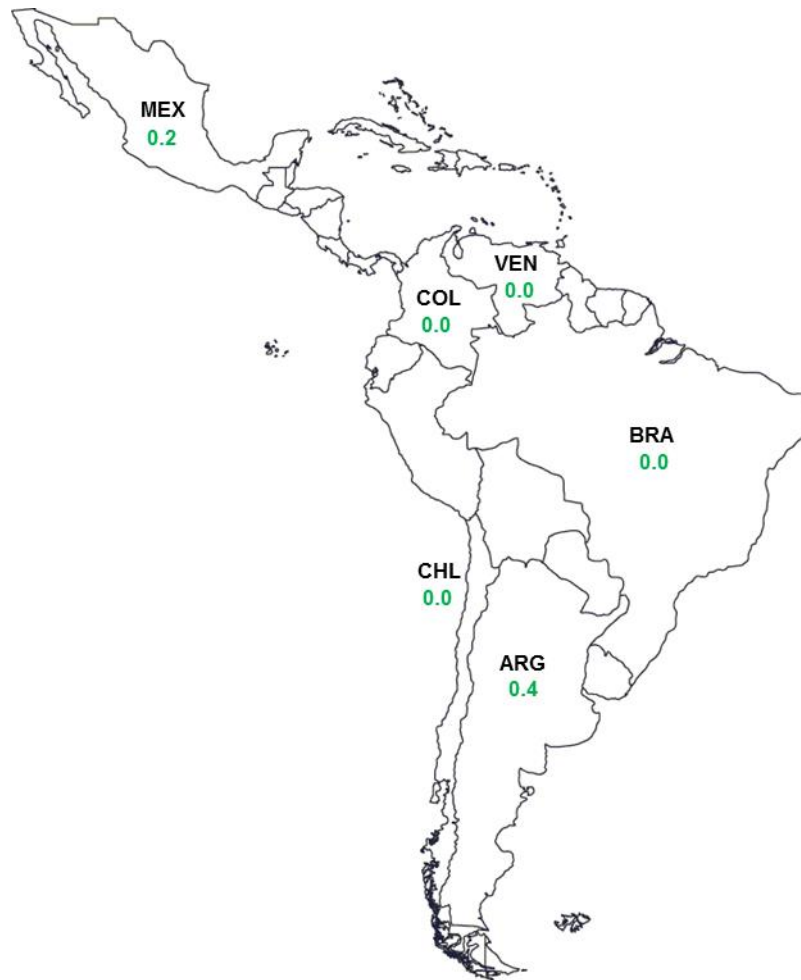

146

147 <sup>a</sup>Colistin-resistant (CST-R),  $\geq 8$  mg/L by CLSI 2016 criteria. Green font,  $< 1\%$  of tested isolates  
148 were CST-R; orange font, 1-1.9% of isolates were CST-R.

149 ARG, Argentina; BRA, Brazil; CHL, Chile; COL, Colombia; MEX, Mexico; VEN, Venezuela.

150 **Table S1.** Demographic information associated with the 9,459 Gram-negative bacilli tested by  
 151 the INFORM global surveillance program from 2012 to 2015

152

|                                                          | <i>Enterobacteriaceae</i><br>(no. of isolates) | <i>P. aeruginosa</i><br>(no. of isolates) |
|----------------------------------------------------------|------------------------------------------------|-------------------------------------------|
| Total no. of isolates                                    | 7,665                                          | 1,794                                     |
| <b>Specimen source</b>                                   |                                                |                                           |
| Intra-abdominal                                          | 1,835                                          | 231                                       |
| Urinary tract                                            | 2,175                                          | 261                                       |
| Skin and soft tissue                                     | 1,795                                          | 507                                       |
| Lower respiratory tract                                  | 1,268                                          | 686                                       |
| Bloodstream                                              | 573                                            | 106                                       |
| Other                                                    | 19                                             | 3                                         |
| <b>Country (number of participating medical centers)</b> |                                                |                                           |
| Argentina (3)                                            | 1,279                                          | 282                                       |
| Brazil (6)                                               | 1,115                                          | 276                                       |
| Chile (3)                                                | 1,236                                          | 282                                       |
| Colombia (4)                                             | 972                                            | 200                                       |
| Mexico (7)                                               | 1,862                                          | 457                                       |
| Venezuela (3)                                            | 1,201                                          | 297                                       |
| <b>Year of isolation</b>                                 |                                                |                                           |
| 2012                                                     | 1,272                                          | 204                                       |
| 2013                                                     | 1,877                                          | 289                                       |
| 2014                                                     | 2,168                                          | 595                                       |
| 2015                                                     | 2,348                                          | 706                                       |

153

154 **Table S2A.** Argentina - *In vitro* activities of ceftazidime-avibactam and comparator  
 155 antimicrobial agents tested against 1,561 isolates of *Enterobacteriaceae* and *P. aeruginosa*  
 156 collected as part of the INFORM global surveillance program in 2012-2015.  
 157

| Organism, phenotype (no. of isolates) <sup>a</sup> | Antimicrobial agent           | MIC (µg/ml) <sup>b</sup> |                   |             | % Susceptible <sup>c</sup> |
|----------------------------------------------------|-------------------------------|--------------------------|-------------------|-------------|----------------------------|
|                                                    |                               | MIC <sub>50</sub>        | MIC <sub>90</sub> | Range       |                            |
| <i>Enterobacteriaceae</i>                          |                               |                          |                   |             |                            |
| All (1,279) <sup>d</sup>                           | Ceftazidime-avibactam         | 0.12                     | 0.5               | ≤0.015->128 | 99.5                       |
|                                                    | Ceftazidime                   | 0.25                     | 64                | 0.03->128   | 75.5                       |
|                                                    | Cefepime                      | ≤0.12                    | >16               | ≤0.12->16   | 76.2                       |
|                                                    | Aztreonam                     | 0.12                     | 128               | ≤0.015->128 | 74.3                       |
|                                                    | Piperacillin-tazobactam       | 4                        | >128              | ≤0.25->128  | 77.3                       |
|                                                    | Doripenem                     | 0.06                     | 0.25              | ≤0.008->4   | 94.1                       |
|                                                    | Imipenem                      | 0.25                     | 4                 | ≤0.03->8    | 81.6                       |
|                                                    | Meropenem                     | 0.03                     | 0.12              | ≤0.004->8   | 93.8                       |
|                                                    | Amikacin                      | 2                        | 16                | ≤0.25->32   | 93.6                       |
|                                                    | Colistin (n=698) <sup>e</sup> | 0.5                      | >4                | ≤0.12->4    | 80.8                       |
|                                                    | Tigecycline                   | 0.5                      | 2                 | 0.06-8      | 93.4                       |
|                                                    | Levofloxacin                  | 0.12                     | >4                | ≤0.03->4    | 70.8                       |
| Ceftazidime non-susceptible (313) <sup>d</sup>     | Ceftazidime-avibactam         | 0.5                      | 2                 | 0.03->128   | 98.1                       |
|                                                    | Ceftazidime                   | 64                       | >128              | 8->128      | 0                          |
|                                                    | Cefepime                      | >16                      | >16               | ≤0.12->16   | 18.9                       |
|                                                    | Aztreonam                     | 64                       | >128              | 0.25->128   | 5.4                        |
|                                                    | Piperacillin-tazobactam       | 128                      | >128              | 0.5->128    | 28.8                       |
|                                                    | Doripenem                     | 0.12                     | >4                | 0.015->4    | 76.4                       |
|                                                    | Imipenem                      | 0.5                      | >8                | 0.06->8     | 70.9                       |
|                                                    | Meropenem                     | 0.06                     | >8                | ≤0.004->8   | 75.1                       |
|                                                    | Amikacin                      | 4                        | 32                | 0.5->32     | 77.3                       |
|                                                    | Colistin (n=167) <sup>e</sup> | 0.5                      | >4                | 0.25->4     | 86.2                       |
|                                                    | Tigecycline                   | 1                        | 2                 | 0.06-8      | 92.3                       |
|                                                    | Levofloxacin                  | >4                       | >4                | ≤0.03->4    | 32.9                       |
| Meropenem non-susceptible (79) <sup>d</sup>        | Ceftazidime-avibactam         | 0.5                      | 2                 | 0.03-16     | 98.7                       |
|                                                    | Ceftazidime                   | 64                       | >128              | 2->128      | 1.3                        |
|                                                    | Cefepime                      | >16                      | >16               | ≤0.12->16   | 5.1                        |
|                                                    | Aztreonam                     | >128                     | >128              | 0.25->128   | 2.5                        |
|                                                    | Piperacillin-tazobactam       | >128                     | >128              | 64->128     | 0                          |
|                                                    | Doripenem                     | >4                       | >4                | 1->4        | 5.1                        |
|                                                    | Imipenem                      | >8                       | >8                | 0.06->8     | 5.1                        |
|                                                    | Meropenem                     | >8                       | >8                | 2->8        | 0                          |
|                                                    | Amikacin                      | 16                       | >32               | 1->32       | 50.6                       |
|                                                    | Colistin (n=50) <sup>e</sup>  | 1                        | >4                | 0.25->4     | 70.0                       |
|                                                    | Tigecycline                   | 1                        | 2                 | 0.12-4      | 97.5                       |
|                                                    | Levofloxacin                  | >4                       | >4                | 0.12->4     | 7.6                        |
| Colistin-resistant (22) <sup>df</sup>              | Ceftazidime-avibactam         | 0.5                      | 1                 | 0.03-2      | 100                        |
|                                                    | Ceftazidime                   | 32                       | >128              | 0.5->128    | 22.7                       |
|                                                    | Cefepime                      | 16                       | >16               | ≤0.12->16   | 18.2                       |
|                                                    | Aztreonam                     | 128                      | >128              | 0.12->128   | 18.2                       |
|                                                    | Piperacillin-tazobactam       | >128                     | >128              | 2->128      | 18.2                       |
|                                                    | Doripenem                     | 4                        | >4                | 0.03->4     | 40.9                       |
|                                                    | Imipenem                      | 8                        | >8                | 0.12->8     | 36.4                       |
|                                                    | Meropenem                     | 8                        | >8                | 0.03->8     | 40.9                       |
|                                                    | Amikacin                      | 16                       | >32               | 1->32       | 68.2                       |
|                                                    | Colistin (n=22) <sup>e</sup>  | >4                       | >4                | 4->4        | 0                          |
|                                                    | Tigecycline                   | 0.5                      | 1                 | 0.25-4      | 95.5                       |
|                                                    | Levofloxacin                  | >4                       | >4                | ≤0.03->4    | 9.1                        |
| Multidrug-resistant (221) <sup>d</sup>             | Ceftazidime-avibactam         | 0.5                      | 2                 | 0.03-32     | 97.7                       |
|                                                    | Ceftazidime                   | 64                       | >128              | 0.12->128   | 9.5                        |
|                                                    | Cefepime                      | >16                      | >16               | ≤0.12->16   | 4.5                        |

| Organism, phenotype (no. of isolates) <sup>a</sup> | Antimicrobial agent           | MIC (µg/ml) <sup>b</sup> |                   |             | % Susceptible <sup>c</sup> |
|----------------------------------------------------|-------------------------------|--------------------------|-------------------|-------------|----------------------------|
|                                                    |                               | MIC <sub>50</sub>        | MIC <sub>90</sub> | Range       |                            |
|                                                    | Aztreonam                     | 128                      | >128              | ≤0.015->128 | 3.6                        |
|                                                    | Piperacillin-tazobactam       | >128                     | >128              | ≤0.25->128  | 19.5                       |
|                                                    | Doripenem                     | 0.12                     | >4                | 0.015->4    | 66.1                       |
|                                                    | Imipenem                      | 0.5                      | >8                | 0.06->8     | 62.0                       |
|                                                    | Meropenem                     | 0.12                     | >8                | 0.03->8     | 65.2                       |
|                                                    | Amikacin                      | 8                        | 32                | 1->32       | 67.9                       |
|                                                    | Colistin (n=126) <sup>e</sup> | 1                        | >4                | 0.25->4     | 76.2                       |
|                                                    | Tigecycline                   | 1                        | 2                 | 0.12-8      | 90.5                       |
|                                                    | Levofloxacin                  | >4                       | >4                | ≤0.03->4    | 12.2                       |
| <i>Escherichia coli</i>                            |                               |                          |                   |             |                            |
| All (425) <sup>d</sup>                             | Ceftazidime-avibactam         | 0.06                     | 0.25              | ≤0.015-1    | 100                        |
|                                                    | Ceftazidime                   | 0.25                     | 16                | 0.03->128   | 87.5                       |
|                                                    | Cefepime                      | ≤0.12                    | 8                 | ≤0.12->16   | 88.2                       |
|                                                    | Aztreonam                     | 0.12                     | 16                | ≤0.015->128 | 86.1                       |
|                                                    | Piperacillin-tazobactam       | 2                        | 16                | ≤0.25->128  | 90.1                       |
|                                                    | Doripenem                     | 0.03                     | 0.06              | ≤0.008->4   | 99.1                       |
|                                                    | Imipenem                      | 0.12                     | 0.25              | 0.06->8     | 99.1                       |
|                                                    | Meropenem                     | 0.03                     | 0.06              | ≤0.004->8   | 99.1                       |
|                                                    | Amikacin                      | 2                        | 8                 | 1->32       | 98.4                       |
|                                                    | Colistin (n=212) <sup>e</sup> | 0.5                      | 1                 | ≤0.12->4    | 98.6                       |
|                                                    | Tigecycline                   | 0.25                     | 0.5               | 0.06-4      | 99.8                       |
|                                                    | Levofloxacin                  | 0.25                     | >4                | ≤0.03->4    | 67.5                       |
| Ceftazidime non-susceptible (53) <sup>d</sup>      | Ceftazidime-avibactam         | 0.25                     | 0.5               | 0.03-1      | 100                        |
|                                                    | Ceftazidime                   | 32                       | 128               | 8->128      | 0                          |
|                                                    | Cefepime                      | >16                      | >16               | ≤0.12->16   | 34.0                       |
|                                                    | Aztreonam                     | 32                       | >128              | 1->128      | 7.6                        |
|                                                    | Piperacillin-tazobactam       | 8                        | >128              | 2->128      | 60.4                       |
|                                                    | Doripenem                     | 0.06                     | 0.12              | 0.015->4    | 92.5                       |
|                                                    | Imipenem                      | 0.25                     | 0.5               | 0.06->8     | 92.5                       |
|                                                    | Meropenem                     | 0.03                     | 0.06              | ≤0.004->8   | 92.5                       |
|                                                    | Amikacin                      | 4                        | 16                | 2->32       | 90.6                       |
|                                                    | Colistin (n=23) <sup>e</sup>  | 0.5                      | 1                 | 0.25->4     | 95.7                       |
|                                                    | Tigecycline                   | 0.25                     | 0.5               | 0.06-4      | 98.1                       |
|                                                    | Levofloxacin                  | >4                       | >4                | ≤0.03->4    | 17.0                       |
| Meropenem non-susceptible (4) <sup>d</sup>         | Ceftazidime-avibactam         | — <sup>b</sup>           | —                 | 0.03-0.25   | 100                        |
|                                                    | Ceftazidime                   | —                        | —                 | 16-64       | 0                          |
|                                                    | Cefepime                      | —                        | —                 | >16->16     | 0                          |
|                                                    | Aztreonam                     | —                        | —                 | 128->128    | 0                          |
|                                                    | Piperacillin-tazobactam       | —                        | —                 | >128->128   | 0                          |
|                                                    | Doripenem                     | —                        | —                 | 2->4        | 0                          |
|                                                    | Imipenem                      | —                        | —                 | 4->8        | 0                          |
|                                                    | Meropenem                     | —                        | —                 | 8->8        | 0                          |
|                                                    | Amikacin                      | —                        | —                 | 4->32       | 50.0                       |
|                                                    | Colistin (n=4) <sup>e</sup>   | —                        | —                 | 0.5-1       | 100                        |
|                                                    | Tigecycline                   | —                        | —                 | 0.12-0.25   | 100                        |
|                                                    | Levofloxacin                  | —                        | —                 | 4->4        | 0                          |
| Colistin-resistant (3) <sup>d</sup>                | Ceftazidime-avibactam         | — <sup>b</sup>           | —                 | 0.12-0.25   | 100                        |
|                                                    | Ceftazidime                   | —                        | —                 | 0.5-8       | 66.7                       |
|                                                    | Cefepime                      | —                        | —                 | 0.25->16    | 33.3                       |
|                                                    | Aztreonam                     | —                        | —                 | 0.25-32     | 33.3                       |
|                                                    | Piperacillin-tazobactam       | —                        | —                 | 2-32        | 66.7                       |
|                                                    | Doripenem                     | —                        | —                 | 0.03-0.06   | 100                        |
|                                                    | Imipenem                      | —                        | —                 | 0.25-0.25   | 100                        |
|                                                    | Meropenem                     | —                        | —                 | 0.03-0.06   | 100                        |
|                                                    | Amikacin                      | —                        | —                 | 2-4         | 100                        |
|                                                    | Colistin (n=3) <sup>e</sup>   | —                        | —                 | 4->4        | 0                          |
|                                                    | Tigecycline                   | —                        | —                 | 0.25-0.5    | 100                        |
|                                                    | Levofloxacin                  | —                        | —                 | ≤0.03->4    | 33.3                       |
| Multidrug-resistant (36) <sup>d</sup>              | Ceftazidime-avibactam         | 0.25                     | 0.5               | 0.03-1      | 100                        |



| Organism, phenotype (no. of isolates) <sup>a</sup> | Antimicrobial agent           | MIC (µg/ml) <sup>b</sup> |                   |             | % Susceptible <sup>c</sup> |
|----------------------------------------------------|-------------------------------|--------------------------|-------------------|-------------|----------------------------|
|                                                    |                               | MIC <sub>50</sub>        | MIC <sub>90</sub> | Range       |                            |
|                                                    | Ceftazidime                   | 32                       | 128               | 0.5->128    | 13.9                       |
|                                                    | Cefepime                      | >16                      | >16               | 16->16      | 0                          |
|                                                    | Aztreonam                     | 64                       | >128              | 0.25->128   | 2.8                        |
|                                                    | Piperacillin-tazobactam       | 8                        | >128              | 2->128      | 61.1                       |
|                                                    | Doripenem                     | 0.06                     | 2                 | 0.015->4    | 88.9                       |
|                                                    | Imipenem                      | 0.25                     | 4                 | 0.12->8     | 88.9                       |
|                                                    | Meropenem                     | 0.03                     | 8                 | 0.03->8     | 88.9                       |
|                                                    | Amikacin                      | 8                        | 32                | 2->32       | 83.3                       |
|                                                    | Colistin (n=18) <sup>e</sup>  | 0.5                      | 4                 | 0.25->4     | 88.9                       |
|                                                    | Tigecycline                   | 0.25                     | 0.5               | 0.12-4      | 97.2                       |
|                                                    | Levofloxacin                  | >4                       | >4                | ≤0.03->4    | 5.6                        |
| <i>Klebsiella pneumoniae</i>                       |                               |                          |                   |             |                            |
| All (357) <sup>d</sup>                             | Ceftazidime-avibactam         | 0.12                     | 1                 | ≤0.015-4    | 100                        |
|                                                    | Ceftazidime                   | 4                        | >128              | 0.06->128   | 50.1                       |
|                                                    | Cefepime                      | 1                        | >16               | ≤0.12->16   | 51.8                       |
|                                                    | Aztreonam                     | 2                        | >128              | ≤0.015->128 | 50.1                       |
|                                                    | Piperacillin-tazobactam       | 16                       | >128              | 0.5->128    | 53.8                       |
|                                                    | Doripenem                     | 0.06                     | >4                | 0.03->4     | 81.8                       |
|                                                    | Imipenem                      | 0.25                     | >8                | 0.06->8     | 81.0                       |
|                                                    | Meropenem                     | 0.06                     | >8                | 0.015->8    | 80.7                       |
|                                                    | Amikacin                      | 2                        | 32                | ≤0.25->32   | 84.6                       |
|                                                    | Colistin (n=213) <sup>e</sup> | 0.5                      | 2                 | 0.25->4     | 91.6                       |
|                                                    | Tigecycline                   | 1                        | 2                 | 0.12-8      | 96.6                       |
|                                                    | Levofloxacin                  | 1                        | >4                | ≤0.03->4    | 60.5                       |
| Ceftazidime non-susceptible (178) <sup>d</sup>     | Ceftazidime-avibactam         | 0.5                      | 1                 | 0.03-4      | 100                        |
|                                                    | Ceftazidime                   | 64                       | >128              | 8->128      | 0                          |
|                                                    | Cefepime                      | >16                      | >16               | ≤0.12->16   | 4.5                        |
|                                                    | Aztreonam                     | 128                      | >128              | 0.25->128   | 1.1                        |
|                                                    | Piperacillin-tazobactam       | >128                     | >128              | 4->128      | 18.5                       |
|                                                    | Doripenem                     | 0.12                     | >4                | 0.03->4     | 63.5                       |
|                                                    | Imipenem                      | 0.5                      | >8                | 0.06->8     | 61.8                       |
|                                                    | Meropenem                     | 0.12                     | >8                | 0.03->8     | 61.2                       |
|                                                    | Amikacin                      | 8                        | 32                | 1->32       | 70.2                       |
|                                                    | Colistin (n=103) <sup>e</sup> | 1                        | >4                | 0.25->4     | 84.5                       |
|                                                    | Tigecycline                   | 1                        | 2                 | 0.12-8      | 94.9                       |
|                                                    | Levofloxacin                  | >4                       | >4                | 0.06->4     | 28.7                       |
| Meropenem non-susceptible (69) <sup>d</sup>        | Ceftazidime-avibactam         | 1                        | 2                 | 0.03-2      | 100                        |
|                                                    | Ceftazidime                   | 64                       | >128              | 8->128      | 0                          |
|                                                    | Cefepime                      | >16                      | >16               | ≤0.12->16   | 2.9                        |
|                                                    | Aztreonam                     | >128                     | >128              | 0.25->128   | 1.5                        |
|                                                    | Piperacillin-tazobactam       | >128                     | >128              | 128->128    | 0                          |
|                                                    | Doripenem                     | >4                       | >4                | 1->4        | 5.8                        |
|                                                    | Imipenem                      | >8                       | >8                | 0.06->8     | 5.8                        |
|                                                    | Meropenem                     | >8                       | >8                | 2->8        | 0                          |
|                                                    | Amikacin                      | 32                       | >32               | 1->32       | 46.4                       |
|                                                    | Colistin (n=42) <sup>e</sup>  | 1                        | >4                | 0.25->4     | 69.1                       |
|                                                    | Tigecycline                   | 1                        | 2                 | 0.25-4      | 97.1                       |
|                                                    | Levofloxacin                  | >4                       | >4                | 2->4        | 1.5                        |
| Colistin-resistant (18) <sup>d</sup>               | Ceftazidime-avibactam         | 0.5                      | 2                 | 0.03-2      | 100                        |
|                                                    | Ceftazidime                   | 32                       | >128              | 0.5->128    | 11.1                       |
|                                                    | Cefepime                      | >16                      | >16               | ≤0.12->16   | 11.1                       |
|                                                    | Aztreonam                     | >128                     | >128              | 0.12->128   | 11.1                       |
|                                                    | Piperacillin-tazobactam       | >128                     | >128              | 4->128      | 5.6                        |
|                                                    | Doripenem                     | 4                        | >4                | 0.03->4     | 27.8                       |
|                                                    | Imipenem                      | >8                       | >8                | 0.12->8     | 22.2                       |
|                                                    | Meropenem                     | >8                       | >8                | 0.03->8     | 27.8                       |
|                                                    | Amikacin                      | 16                       | >32               | 1->32       | 61.1                       |
|                                                    | Colistin (n=18) <sup>e</sup>  | >4                       | >4                | 4->4        | 0                          |
|                                                    | Tigecycline                   | 0.5                      | 2                 | 0.25-4      | 94.4                       |
|                                                    | Levofloxacin                  | >4                       | >4                | 4->4        | 0                          |

| Organism, phenotype (no. of isolates) <sup>a</sup> | Antimicrobial agent                          | MIC (µg/ml) <sup>b</sup> |                   |                 | % Susceptible <sup>c</sup> |      |
|----------------------------------------------------|----------------------------------------------|--------------------------|-------------------|-----------------|----------------------------|------|
|                                                    |                                              | MIC <sub>50</sub>        | MIC <sub>90</sub> | Range           |                            |      |
| Multidrug-resistant (134) <sup>d</sup>             | Ceftazidime-avibactam                        | 0.5                      | 1                 | 0.03–2          | 100                        |      |
|                                                    | Ceftazidime                                  | 64                       | >128              | 0.5–>128        | 0.8                        |      |
|                                                    | Cefepime                                     | >16                      | >16               | ≤0.12–>16       | 2.2                        |      |
|                                                    | Aztreonam                                    | >128                     | >128              | 0.12–>128       | 0.8                        |      |
|                                                    | Piperacillin-tazobactam                      | >128                     | >128              | 4–>128          | 6.0                        |      |
|                                                    | Doripenem                                    | 1                        | >4                | 0.03–>4         | 51.5                       |      |
|                                                    | Imipenem                                     | 2                        | >8                | 0.06–>8         | 50.0                       |      |
|                                                    | Meropenem                                    | 2                        | >8                | 0.03–>8         | 49.3                       |      |
|                                                    | Amikacin                                     | 16                       | 32                | 1–>32           | 61.2                       |      |
|                                                    | Colistin (n=79) <sup>e</sup>                 | 1                        | >4                | 0.25–>4         | 78.5                       |      |
|                                                    | Tigecycline                                  | 1                        | 2                 | 0.12–8          | 93.3                       |      |
| Levofloxacin                                       | >4                                           | >4                       | 0.12–>4           | 7.5             |                            |      |
| <i>Klebsiella oxytoca</i> <sup>g</sup>             |                                              |                          |                   |                 |                            |      |
| All (71) <sup>d</sup>                              | Ceftazidime-avibactam                        | 0.12                     | 0.5               | 0.03–16         | 98.6                       |      |
|                                                    | Ceftazidime                                  | 0.12                     | 2                 | 0.06–>128       | 93.0                       |      |
|                                                    | Cefepime                                     | ≤0.12                    | 2                 | ≤0.12–16        | 90.1                       |      |
|                                                    | Aztreonam                                    | 0.25                     | 128               | 0.03–>128       | 81.7                       |      |
|                                                    | Piperacillin-tazobactam                      | 2                        | >128              | 0.5–>128        | 80.3                       |      |
|                                                    | Doripenem                                    | 0.06                     | 0.12              | 0.03–>4         | 98.6                       |      |
|                                                    | Imipenem                                     | 0.25                     | 0.5               | 0.06–8          | 97.2                       |      |
|                                                    | Meropenem                                    | 0.03                     | 0.06              | 0.015–>8        | 98.6                       |      |
|                                                    | Amikacin                                     | 2                        | 4                 | 0.5–32          | 98.6                       |      |
|                                                    | Colistin (n=38) <sup>e</sup>                 | 0.5                      | 1                 | 0.25–1          | 100                        |      |
|                                                    | Tigecycline                                  | 0.5                      | 1                 | 0.12–2          | 100                        |      |
|                                                    | Levofloxacin                                 | 0.06                     | 2                 | ≤0.03–>4        | 91.6                       |      |
|                                                    | Ceftazidime non-susceptible (5) <sup>d</sup> | Ceftazidime-avibactam    | — <sup>b</sup>    | —               | 0.5–16                     | 80.0 |
|                                                    |                                              | Ceftazidime              | —                 | —               | 8–>128                     | 0    |
| Cefepime                                           |                                              | —                        | —                 | 1–16            | 20.0                       |      |
| Aztreonam                                          |                                              | —                        | —                 | 32–>128         | 0                          |      |
| Piperacillin-tazobactam                            |                                              | —                        | —                 | 2–>128          | 20.0                       |      |
| Doripenem                                          |                                              | —                        | —                 | 0.03–>4         | 80.0                       |      |
| Imipenem                                           |                                              | —                        | —                 | 0.25–8          | 60.0                       |      |
| Meropenem                                          |                                              | —                        | —                 | 0.03–>8         | 80.0                       |      |
| Amikacin                                           |                                              | —                        | —                 | 0.5–32          | 80.0                       |      |
| Colistin (n=2) <sup>e</sup>                        |                                              | —                        | —                 | 0.5–1           | 100                        |      |
| Tigecycline                                        |                                              | —                        | —                 | 0.25–1          | 100                        |      |
| Levofloxacin                                       |                                              | —                        | —                 | 0.06–>4         | 80.0                       |      |
| Meropenem non-susceptible (1) <sup>d</sup>         |                                              | Ceftazidime-avibactam    | — <sup>b</sup>    | —               | 16                         | 0    |
|                                                    | Ceftazidime                                  | —                        | —                 | >128            | 0                          |      |
|                                                    | Cefepime                                     | —                        | —                 | 8               | 0                          |      |
|                                                    | Aztreonam                                    | —                        | —                 | >128            | 0                          |      |
|                                                    | Piperacillin-tazobactam                      | —                        | —                 | 128             | 0                          |      |
|                                                    | Doripenem                                    | —                        | —                 | >4              | 0                          |      |
|                                                    | Imipenem                                     | —                        | —                 | 8               | 0                          |      |
|                                                    | Meropenem                                    | —                        | —                 | >8              | 0                          |      |
|                                                    | Amikacin                                     | —                        | —                 | 8               | 100                        |      |
|                                                    | Colistin (n=0) <sup>e</sup>                  | —                        | —                 | ND <sup>e</sup> | ND                         |      |
|                                                    | Tigecycline                                  | —                        | —                 | 1               | 100                        |      |
|                                                    | Levofloxacin                                 | —                        | —                 | 2               | 100                        |      |
|                                                    | Multidrug-resistant (5) <sup>d</sup>         | Ceftazidime-avibactam    | — <sup>b</sup>    | —               | 0.25–16                    | 80.0 |
| Ceftazidime                                        |                                              | —                        | —                 | 1–>128          | 60.0                       |      |
| Cefepime                                           |                                              | —                        | —                 | 2–16            | 40.0                       |      |
| Aztreonam                                          |                                              | —                        | —                 | 128–>128        | 0                          |      |
| Piperacillin-tazobactam                            |                                              | —                        | —                 | 128–>128        | 0                          |      |
| Doripenem                                          |                                              | —                        | —                 | 0.06–>4         | 80.0                       |      |
| Imipenem                                           |                                              | —                        | —                 | 0.12–8          | 80.0                       |      |
| Meropenem                                          |                                              | —                        | —                 | 0.06–>8         | 80.0                       |      |
| Amikacin                                           |                                              | —                        | —                 | 1–32            | 80.0                       |      |
| Colistin (n=3) <sup>e</sup>                        |                                              | —                        | —                 | 0.5–1           | 100                        |      |

| Organism, phenotype (no. of isolates) <sup>a</sup> | Antimicrobial agent          | MIC (µg/ml) <sup>b</sup> |                   |             | % Susceptible <sup>c</sup> |
|----------------------------------------------------|------------------------------|--------------------------|-------------------|-------------|----------------------------|
|                                                    |                              | MIC <sub>50</sub>        | MIC <sub>90</sub> | Range       |                            |
|                                                    | Tigecycline                  | —                        | —                 | 0.5–2       | 100                        |
|                                                    | Levofloxacin                 | —                        | —                 | 2–>4        | 20.0                       |
| <i>Enterobacter</i> spp.                           |                              |                          |                   |             |                            |
| All (136) <sup>d,h</sup>                           | Ceftazidime-avibactam        | 0.25                     | 2                 | 0.03–32     | 97.1                       |
|                                                    | Ceftazidime                  | 0.5                      | >128              | 0.03–>128   | 64.7                       |
|                                                    | Cefepime                     | ≤0.12                    | >16               | ≤0.12–>16   | 71.3                       |
|                                                    | Aztreonam                    | 0.25                     | >128              | ≤0.015–>128 | 62.5                       |
|                                                    | Piperacillin-tazobactam      | 4                        | >128              | 1–>128      | 69.1                       |
|                                                    | Doripenem                    | 0.06                     | 0.25              | 0.015–>4    | 97.8                       |
|                                                    | Imipenem                     | 0.5                      | 2                 | ≤0.03–>8    | 86.8                       |
|                                                    | Meropenem                    | 0.06                     | 0.25              | 0.008–>8    | 97.8                       |
|                                                    | Amikacin                     | 2                        | 8                 | 0.5–32      | 97.8                       |
|                                                    | Colistin (n=77) <sup>e</sup> | 0.5                      | 1                 | 0.25–>4     | 98.7                       |
|                                                    | Tigecycline                  | 0.5                      | 2                 | 0.25–4      | 93.4                       |
|                                                    | Levofloxacin                 | 0.12                     | >4                | ≤0.03–>4    | 77.9                       |
| Ceftazidime non-susceptible (48) <sup>d</sup>      | Ceftazidime-avibactam        | 1                        | 8                 | 0.03–32     | 91.7                       |
|                                                    | Ceftazidime                  | 128                      | >128              | 8–>128      | 0                          |
|                                                    | Cefepime                     | 16                       | >16               | ≤0.12–>16   | 27.1                       |
|                                                    | Aztreonam                    | 64                       | >128              | 2–>128      | 2.1                        |
|                                                    | Piperacillin-tazobactam      | 64                       | >128              | 2–>128      | 22.9                       |
|                                                    | Doripenem                    | 0.12                     | 0.5               | 0.03–>4     | 93.8                       |
|                                                    | Imipenem                     | 0.5                      | 2                 | 0.06–>8     | 89.6                       |
|                                                    | Meropenem                    | 0.12                     | 1                 | 0.03–>8     | 93.8                       |
|                                                    | Amikacin                     | 4                        | 16                | 0.5–32      | 93.8                       |
|                                                    | Colistin (n=29) <sup>e</sup> | 0.5                      | 1                 | 0.25–1      | 100                        |
|                                                    | Tigecycline                  | 1                        | 4                 | 0.25–4      | 85.4                       |
|                                                    | Levofloxacin                 | 2                        | >4                | ≤0.03–>4    | 50.0                       |
| Meropenem non-susceptible (3) <sup>d</sup>         | Ceftazidime-avibactam        | — <sup>b</sup>           | —                 | 0.5–4       | 100                        |
|                                                    | Ceftazidime                  | —                        | —                 | 128–>128    | 0                          |
|                                                    | Cefepime                     | —                        | —                 | ≤0.12–>16   | 33.3                       |
|                                                    | Aztreonam                    | —                        | —                 | >128–>128   | 0                          |
|                                                    | Piperacillin-tazobactam      | —                        | —                 | >128–>128   | 0                          |
|                                                    | Doripenem                    | —                        | —                 | 2–>4        | 0                          |
|                                                    | Imipenem                     | —                        | —                 | 4–>8        | 0                          |
|                                                    | Meropenem                    | —                        | —                 | 2–>8        | 0                          |
|                                                    | Amikacin                     | —                        | —                 | 4–16        | 100                        |
|                                                    | Colistin (n=2) <sup>e</sup>  | —                        | —                 | 0.5–1       | 100                        |
|                                                    | Tigecycline                  | —                        | —                 | 0.25–0.5    | 100                        |
|                                                    | Levofloxacin                 | —                        | —                 | 0.12–>4     | 66.7                       |
| Colistin-resistant (1) <sup>d</sup>                | Ceftazidime-avibactam        | — <sup>b</sup>           | —                 | 0.5         | 100                        |
|                                                    | Ceftazidime                  | —                        | —                 | 2           | 100                        |
|                                                    | Cefepime                     | —                        | —                 | ≤0.12       | 100                        |
|                                                    | Aztreonam                    | —                        | —                 | 0.5         | 100                        |
|                                                    | Piperacillin-tazobactam      | —                        | —                 | 4           | 100                        |
|                                                    | Doripenem                    | —                        | —                 | 0.12        | 100                        |
|                                                    | Imipenem                     | —                        | —                 | 0.5         | 100                        |
|                                                    | Meropenem                    | —                        | —                 | 0.12        | 100                        |
|                                                    | Amikacin                     | —                        | —                 | 2           | 100                        |
|                                                    | Colistin (n=1) <sup>e</sup>  | —                        | —                 | >4          | 0                          |
|                                                    | Tigecycline                  | —                        | —                 | 0.5         | 100                        |
|                                                    | Levofloxacin                 | —                        | —                 | 0.06        | 100                        |
| Multidrug-resistant (26) <sup>d</sup>              | Ceftazidime-avibactam        | 2                        | 32                | 0.25–32     | 84.6                       |
|                                                    | Ceftazidime                  | 128                      | >128              | 16–>128     | 0                          |
|                                                    | Cefepime                     | >16                      | >16               | ≤0.12–>16   | 7.7                        |
|                                                    | Aztreonam                    | 128                      | >128              | 32–>128     | 0                          |
|                                                    | Piperacillin-tazobactam      | >128                     | >128              | 8–>128      | 11.5                       |
|                                                    | Doripenem                    | 0.25                     | 2                 | 0.06–>4     | 88.5                       |
|                                                    | Imipenem                     | 0.5                      | 4                 | 0.06–>8     | 88.5                       |
|                                                    | Meropenem                    | 0.12                     | 2                 | 0.06–>8     | 88.5                       |

| Organism, phenotype (no. of isolates) <sup>a</sup> | Antimicrobial agent          | MIC (µg/ml) <sup>b</sup> |                   |                 | % Susceptible <sup>c</sup> |
|----------------------------------------------------|------------------------------|--------------------------|-------------------|-----------------|----------------------------|
|                                                    |                              | MIC <sub>50</sub>        | MIC <sub>90</sub> | Range           |                            |
|                                                    | Amikacin                     | 4                        | 32                | 1–32            | 88.5                       |
|                                                    | Colistin (n=15) <sup>e</sup> | 0.5                      | 1                 | 0.25–1          | 100                        |
|                                                    | Tigecycline                  | 1                        | 4                 | 0.25–4          | 80.8                       |
|                                                    | Levofloxacin                 | >4                       | >4                | 0.12–>4         | 19.2                       |
| <hr/>                                              |                              |                          |                   |                 |                            |
| <i>Citrobacter</i> spp. <sup>g,j</sup>             |                              |                          |                   |                 |                            |
| All (71) <sup>d,i</sup>                            | Ceftazidime-avibactam        | 0.12                     | 0.5               | ≤0.015–1        | 100                        |
|                                                    | Ceftazidime                  | 0.5                      | 128               | 0.06–>128       | 81.7                       |
|                                                    | Cefepime                     | ≤0.12                    | 1                 | ≤0.12–16        | 93.0                       |
|                                                    | Aztreonam                    | 0.12                     | 32                | 0.03–>128       | 81.7                       |
|                                                    | Piperacillin-tazobactam      | 4                        | 128               | 1–>128          | 77.5                       |
|                                                    | Doripenem                    | 0.06                     | 0.12              | 0.03–0.25       | 100                        |
|                                                    | Imipenem                     | 0.5                      | 2                 | 0.06–2          | 87.3                       |
|                                                    | Meropenem                    | 0.03                     | 0.06              | 0.015–0.25      | 100                        |
|                                                    | Amikacin                     | 2                        | 8                 | ≤0.25–>32       | 94.4                       |
|                                                    | Colistin (n=40) <sup>e</sup> | 0.5                      | 1                 | ≤0.12–2         | 100                        |
|                                                    | Tigecycline                  | 0.5                      | 1                 | 0.12–2          | 100                        |
|                                                    | Levofloxacin                 | 0.06                     | 4                 | ≤0.03–>4        | 87.3                       |
| Ceftazidime non-susceptible (13) <sup>d</sup>      | Ceftazidime-avibactam        | 0.5                      | 1                 | 0.25–1          | 100                        |
|                                                    | Ceftazidime                  | 128                      | >128              | 16–>128         | 0                          |
|                                                    | Cefepime                     | 1                        | 4                 | ≤0.12–8         | 76.9                       |
|                                                    | Aztreonam                    | 32                       | 64                | 0.5–>128        | 7.7                        |
|                                                    | Piperacillin-tazobactam      | 64                       | >128              | 8–>128          | 15.4                       |
|                                                    | Doripenem                    | 0.06                     | 0.25              | 0.06–0.25       | 100                        |
|                                                    | Imipenem                     | 0.5                      | 1                 | 0.25–2          | 92.3                       |
|                                                    | Meropenem                    | 0.06                     | 0.12              | 0.03–0.25       | 100                        |
|                                                    | Amikacin                     | 2                        | >32               | 1–>32           | 69.2                       |
|                                                    | Colistin (n=3) <sup>e</sup>  | — <sup>b</sup>           | —                 | 0.5–1           | 100                        |
|                                                    | Tigecycline                  | 0.5                      | 2                 | 0.25–2          | 100                        |
|                                                    | Levofloxacin                 | 0.5                      | >4                | 0.12–>4         | 61.5                       |
| Multidrug-resistant (4) <sup>d</sup>               | Ceftazidime-avibactam        | — <sup>b</sup>           | —                 | 0.12–1          | 100                        |
|                                                    | Ceftazidime                  | —                        | —                 | 4–>128          | 25.0                       |
|                                                    | Cefepime                     | —                        | —                 | 1–16            | 50.0                       |
|                                                    | Aztreonam                    | —                        | —                 | 32–64           | 0                          |
|                                                    | Piperacillin-tazobactam      | —                        | —                 | 32–>128         | 0                          |
|                                                    | Doripenem                    | —                        | —                 | 0.03–0.12       | 100                        |
|                                                    | Imipenem                     | —                        | —                 | 0.25–0.5        | 100                        |
|                                                    | Meropenem                    | —                        | —                 | 0.03–0.06       | 100                        |
|                                                    | Amikacin                     | —                        | —                 | 4–>32           | 25.0                       |
|                                                    | Colistin (n=0) <sup>e</sup>  | —                        | —                 | ND <sup>e</sup> | ND                         |
|                                                    | Tigecycline                  | —                        | —                 | 0.5–1           | 100                        |
|                                                    | Levofloxacin                 | —                        | —                 | 0.25–>4         | 75.0                       |
| <hr/>                                              |                              |                          |                   |                 |                            |
| Proteaceae <sup>j</sup>                            |                              |                          |                   |                 |                            |
| All (180) <sup>d,k</sup>                           | Ceftazidime-avibactam        | 0.06                     | 0.12              | ≤0.015–1        | 100                        |
|                                                    | Ceftazidime                  | 0.06                     | 4                 | 0.03–>128       | 93.9                       |
|                                                    | Cefepime                     | ≤0.12                    | 4                 | ≤0.12–>16       | 86.1                       |
|                                                    | Aztreonam                    | ≤0.015                   | 2                 | ≤0.015–128      | 96.1                       |
|                                                    | Piperacillin-tazobactam      | 0.5                      | 2                 | ≤0.25–>128      | 96.7                       |
|                                                    | Doripenem                    | 0.25                     | 0.5               | 0.06–2          | 99.4                       |
|                                                    | Imipenem                     | 2                        | 4                 | 0.25–8          | 27.2                       |
|                                                    | Meropenem                    | 0.12                     | 0.12              | 0.03–1          | 100                        |
|                                                    | Amikacin                     | 4                        | 8                 | ≤0.25–>32       | 96.7                       |
|                                                    | Colistin (n=97) <sup>e</sup> | >4                       | >4                | >4–>4           | 0                          |
|                                                    | Tigecycline                  | 2                        | 4                 | 0.25–8          | 65.0                       |
|                                                    | Levofloxacin                 | 0.12                     | >4                | ≤0.03–>4        | 72.2                       |
| Ceftazidime-non-susceptible (11) <sup>d</sup>      | Ceftazidime-avibactam        | 0.06                     | 0.5               | 0.03–1          | 100                        |
|                                                    | Ceftazidime                  | 16                       | 32                | 8–>128          | 0                          |
|                                                    | Cefepime                     | ≤0.12                    | 4                 | ≤0.12–>16       | 72.7                       |
|                                                    | Aztreonam                    | 2                        | 16                | 0.25–128        | 81.8                       |
|                                                    | Piperacillin-tazobactam      | 2                        | 8                 | 0.5–128         | 90.9                       |

| Organism, phenotype (no. of isolates) <sup>a</sup>                     | Antimicrobial agent                          | MIC (µg/ml) <sup>b</sup> |                   |            | % Susceptible <sup>c</sup> |      |
|------------------------------------------------------------------------|----------------------------------------------|--------------------------|-------------------|------------|----------------------------|------|
|                                                                        |                                              | MIC <sub>50</sub>        | MIC <sub>90</sub> | Range      |                            |      |
|                                                                        | Doripenem                                    | 0.25                     | 0.5               | 0.12–0.5   | 100                        |      |
|                                                                        | Imipenem                                     | 2                        | 2                 | 1–4        | 9.1                        |      |
|                                                                        | Meropenem                                    | 0.12                     | 0.12              | 0.06–0.25  | 100                        |      |
|                                                                        | Amikacin                                     | 4                        | 32                | 0.5–>32    | 81.8                       |      |
|                                                                        | Colistin (n=5) <sup>e</sup>                  | — <sup>b</sup>           | —                 | >4–>4      | 0                          |      |
|                                                                        | Tigecycline                                  | 4                        | 8                 | 1–8        | 36.4                       |      |
|                                                                        | Levofloxacin                                 | >4                       | >4                | ≤0.03–>4   | 18.2                       |      |
|                                                                        | Multidrug-resistant (11) <sup>d</sup>        | Ceftazidime-avibactam    | 0.06              | 0.12       | 0.03–0.12                  | 100  |
|                                                                        |                                              | Ceftazidime              | 2                 | 16         | 0.12–>128                  | 81.8 |
|                                                                        |                                              | Cefepime                 | >16               | >16        | 0.25–>16                   | 9.1  |
| Aztreonam                                                              |                                              | 4                        | 32                | ≤0.015–128 | 54.6                       |      |
| Piperacillin-tazobactam                                                |                                              | 1                        | 128               | ≤0.25–>128 | 81.8                       |      |
| Doripenem                                                              |                                              | 0.25                     | 0.25              | 0.06–2     | 90.9                       |      |
| Imipenem                                                               |                                              | 2                        | 4                 | 0.25–8     | 27.3                       |      |
| Meropenem                                                              |                                              | 0.06                     | 0.12              | 0.06–1     | 100                        |      |
| Amikacin                                                               |                                              | 8                        | 32                | 1–>32      | 81.8                       |      |
| Colistin (n=9) <sup>e</sup>                                            |                                              | — <sup>b</sup>           | —                 | >4–>4      | 0                          |      |
| Tigecycline                                                            |                                              | 4                        | 8                 | 2–8        | 45.5                       |      |
| Levofloxacin                                                           |                                              | >4                       | >4                | 1–>4       | 9.1                        |      |
| Other <i>Enterobacteriaceae</i> <sup>g</sup><br>All (39) <sup>d1</sup> |                                              | Ceftazidime-avibactam    | 0.25              | 0.5        | 0.06–>128                  | 97.4 |
|                                                                        | Ceftazidime                                  | 0.25                     | 8                 | 0.06–>128  | 87.2                       |      |
|                                                                        | Cefepime                                     | ≤0.12                    | >16               | ≤0.12–>16  | 84.6                       |      |
|                                                                        | Aztreonam                                    | 0.12                     | 64                | 0.03–>128  | 79.5                       |      |
|                                                                        | Piperacillin-tazobactam                      | 2                        | >128              | 1–>128     | 84.6                       |      |
|                                                                        | Doripenem                                    | 0.12                     | 0.25              | 0.03–>4    | 94.9                       |      |
|                                                                        | Imipenem                                     | 0.5                      | 2                 | 0.06–>8    | 89.7                       |      |
|                                                                        | Meropenem                                    | 0.06                     | 0.12              | 0.03–>8    | 94.9                       |      |
|                                                                        | Amikacin                                     | 2                        | 32                | 1–>32      | 84.6                       |      |
|                                                                        | Colistin (n=21) <sup>e</sup>                 | >4                       | >4                | 0.5–>4     | 28.6                       |      |
|                                                                        | Tigecycline                                  | 1                        | 2                 | 0.25–2     | 100                        |      |
|                                                                        | Levofloxacin                                 | 0.12                     | 1                 | ≤0.03–2    | 100                        |      |
|                                                                        | Ceftazidime-non-susceptible (5) <sup>d</sup> | Ceftazidime-avibactam    | — <sup>b</sup>    | —          | 0.25–>128                  | 80.0 |
|                                                                        |                                              | Ceftazidime              | —                 | —          | 8–>128                     | 0    |
|                                                                        |                                              | Cefepime                 | —                 | —          | 0.5–>16                    | 20.0 |
| Aztreonam                                                              |                                              | —                        | —                 | 16–>128    | 0                          |      |
| Piperacillin-tazobactam                                                |                                              | —                        | —                 | 16–>128    | 20.0                       |      |
| Doripenem                                                              |                                              | —                        | —                 | 0.06–>4    | 80.0                       |      |
| Imipenem                                                               |                                              | —                        | —                 | 0.25–>8    | 80.0                       |      |
| Meropenem                                                              |                                              | —                        | —                 | 0.06–>8    | 80.0                       |      |
| Amikacin                                                               |                                              | —                        | —                 | 2–>32      | 40.0                       |      |
| Colistin (n=2) <sup>e</sup>                                            |                                              | —                        | —                 | 1–>4       | 50.0                       |      |
| Meropenem non-susceptible (2) <sup>d</sup>                             | Ceftazidime-avibactam                        | — <sup>b</sup>           | —                 | 0.5–0.5    | 100                        |      |
|                                                                        | Ceftazidime                                  | —                        | —                 | 2–8        | 50.0                       |      |
|                                                                        | Cefepime                                     | —                        | —                 | 1–16       | 50.0                       |      |
|                                                                        | Aztreonam                                    | —                        | —                 | 4–128      | 50.0                       |      |
|                                                                        | Piperacillin-tazobactam                      | —                        | —                 | 64–128     | 0                          |      |
|                                                                        | Doripenem                                    | —                        | —                 | 2–>4       | 0                          |      |
|                                                                        | Imipenem                                     | —                        | —                 | >8–>8      | 0                          |      |
|                                                                        | Meropenem                                    | —                        | —                 | 2–>8       | 0                          |      |
|                                                                        | Amikacin                                     | —                        | —                 | 2–2        | 100                        |      |
|                                                                        | Colistin (n=2) <sup>e</sup>                  | —                        | —                 | >4–>4      | 0                          |      |
| Multidrug-resistant (5) <sup>d</sup>                                   | Ceftazidime-avibactam                        | — <sup>b</sup>           | —                 | 0.5–1      | 100                        |      |
|                                                                        | Ceftazidime                                  | —                        | —                 | 1–8        | 40.0                       |      |
|                                                                        | Cefepime                                     | —                        | —                 | 16–>16     | 0                          |      |

| Organism, phenotype (no. of isolates) <sup>a</sup> | Antimicrobial agent           | MIC (µg/ml) <sup>b</sup> |                   |            | % Susceptible <sup>c</sup> |
|----------------------------------------------------|-------------------------------|--------------------------|-------------------|------------|----------------------------|
|                                                    |                               | MIC <sub>50</sub>        | MIC <sub>90</sub> | Range      |                            |
|                                                    | Aztreonam                     | —                        | —                 | 64–128     | 0                          |
|                                                    | Piperacillin-tazobactam       | —                        | —                 | 16–>128    | 20.0                       |
|                                                    | Doripenem                     | —                        | —                 | 0.12–>4    | 80.0                       |
|                                                    | Imipenem                      | —                        | —                 | 0.25–>8    | 80.0                       |
|                                                    | Meropenem                     | —                        | —                 | 0.06–>8    | 80.0                       |
|                                                    | Amikacin                      | —                        | —                 | 2–>32      | 20.0                       |
|                                                    | Colistin (n=2) <sup>c</sup>   | —                        | —                 | >4–>4      | 0                          |
|                                                    | Tigecycline                   | —                        | —                 | 1–2        | 100                        |
|                                                    | Levofloxacin                  | —                        | —                 | 0.25–2     | 100                        |
| <i>Pseudomonas aeruginosa</i>                      |                               |                          |                   |            |                            |
| All (282)                                          | Ceftazidime-avibactam         | 2                        | 8                 | 0.25–>128  | 94.7                       |
|                                                    | Ceftazidime                   | 4                        | 32                | 0.25–>128  | 76.2                       |
|                                                    | Cefepime                      | 4                        | >16               | 0.25–>16   | 77.7                       |
|                                                    | Aztreonam                     | 8                        | 32                | 0.12–>128  | 58.2                       |
|                                                    | Piperacillin-tazobactam       | 8                        | >128              | ≤0.25–>128 | 65.3                       |
|                                                    | Doripenem                     | 1                        | >4                | 0.06–>4    | 69.2                       |
|                                                    | Imipenem                      | 2                        | >8                | 0.25–>8    | 61.7                       |
|                                                    | Meropenem                     | 0.5                      | >8                | ≤0.06–>8   | 65.3                       |
|                                                    | Amikacin                      | 4                        | >32               | ≤0.25–>32  | 83.0                       |
|                                                    | Colistin (n=210) <sup>c</sup> | 2                        | 2                 | 0.5–8      | 96.2                       |
|                                                    | Levofloxacin                  | 1                        | >4                | ≤0.03–>4   | 63.8                       |
| All, MBL-negative (280)                            | Ceftazidime-avibactam         | 2                        | 8                 | 0.25–32    | 95.4                       |
|                                                    | Ceftazidime                   | 4                        | 32                | 0.25–128   | 76.8                       |
|                                                    | Cefepime                      | 4                        | >16               | 0.25–>16   | 78.2                       |
|                                                    | Aztreonam                     | 8                        | 32                | 0.12–>128  | 57.9                       |
|                                                    | Piperacillin-tazobactam       | 8                        | >128              | ≤0.25–>128 | 65.4                       |
|                                                    | Doripenem                     | 1                        | >4                | 0.06–>4    | 69.6                       |
|                                                    | Imipenem                      | 2                        | >8                | 0.25–>8    | 62.1                       |
|                                                    | Meropenem                     | 0.5                      | >8                | ≤0.06–>8   | 65.7                       |
|                                                    | Amikacin                      | 4                        | >32               | ≤0.25–>32  | 83.2                       |
|                                                    | Colistin (n=209) <sup>c</sup> | 2                        | 2                 | 0.5–8      | 96.2                       |
|                                                    | Levofloxacin                  | 1                        | >4                | ≤0.03–>4   | 64.3                       |
| Ceftazidime-non-susceptible (67)                   | Ceftazidime-avibactam         | 8                        | 16                | 1–>128     | 77.6                       |
|                                                    | Ceftazidime                   | 32                       | 64                | 16–>128    | 0                          |
|                                                    | Cefepime                      | >16                      | >16               | 0.25–>16   | 16.4                       |
|                                                    | Aztreonam                     | 32                       | 128               | 4–>128     | 7.5                        |
|                                                    | Piperacillin-tazobactam       | >128                     | >128              | 8–>128     | 3.0                        |
|                                                    | Doripenem                     | >4                       | >4                | 0.12–>4    | 23.9                       |
|                                                    | Imipenem                      | 4                        | >8                | 1–>8       | 38.8                       |
|                                                    | Meropenem                     | 8                        | >8                | ≤0.06–>8   | 20.9                       |
|                                                    | Amikacin                      | 32                       | >32               | 2–>32      | 44.8                       |
|                                                    | Colistin (n=49) <sup>c</sup>  | 2                        | 2                 | 0.5–8      | 93.9                       |
|                                                    | Levofloxacin                  | >4                       | >4                | 0.25–>4    | 20.9                       |
| Ceftazidime-non-susceptible, MBL-negative (65)     | Ceftazidime-avibactam         | 8                        | 16                | 1–32       | 80.0                       |
|                                                    | Ceftazidime                   | 32                       | 64                | 16–128     | 0                          |
|                                                    | Cefepime                      | >16                      | >16               | 0.25–>16   | 16.9                       |
|                                                    | Aztreonam                     | 32                       | 128               | 4–>128     | 4.6                        |
|                                                    | Piperacillin-tazobactam       | >128                     | >128              | 8–>128     | 1.5                        |
|                                                    | Doripenem                     | >4                       | >4                | 0.12–>4    | 24.6                       |
|                                                    | Imipenem                      | 4                        | >8                | 1–>8       | 40.0                       |
|                                                    | Meropenem                     | 8                        | >8                | ≤0.06–>8   | 21.5                       |
|                                                    | Amikacin                      | 32                       | >32               | 2–>32      | 44.6                       |
|                                                    | Colistin (n=48) <sup>c</sup>  | 2                        | 2                 | 0.5–8      | 93.8                       |
|                                                    | Levofloxacin                  | >4                       | >4                | 0.25–>4    | 21.5                       |
| Meropenem non-susceptible (98)                     | Ceftazidime-avibactam         | 4                        | 16                | 1–>128     | 84.7                       |
|                                                    | Ceftazidime                   | 16                       | 64                | 2–>128     | 45.9                       |
|                                                    | Cefepime                      | 16                       | >16               | 0.25–>16   | 49.0                       |
|                                                    | Aztreonam                     | 32                       | 64                | 4–>128     | 17.4                       |
|                                                    | Piperacillin-tazobactam       | 64                       | >128              | 4–>128     | 30.6                       |

| Organism, phenotype (no. of isolates) <sup>a</sup> | Antimicrobial agent          | MIC (µg/ml) <sup>b</sup> |                   |          | % Susceptible <sup>c</sup> |
|----------------------------------------------------|------------------------------|--------------------------|-------------------|----------|----------------------------|
|                                                    |                              | MIC <sub>50</sub>        | MIC <sub>90</sub> | Range    |                            |
|                                                    | Doripenem                    | >4                       | >4                | 1->4     | 12.2                       |
|                                                    | Imipenem                     | >8                       | >8                | 2->8     | 19.4                       |
|                                                    | Meropenem                    | 8                        | >8                | 4->8     | 0                          |
|                                                    | Amikacin                     | 8                        | >32               | 2->32    | 59.2                       |
|                                                    | Colistin (n=70) <sup>e</sup> | 2                        | 2                 | 1-8      | 97.1                       |
|                                                    | Levofloxacin                 | >4                       | >4                | 0.25->4  | 29.6                       |
| Meropenem-non-susceptible, MBL-negative (96)       | Ceftazidime-avibactam        | 4                        | 16                | 1-32     | 86.5                       |
|                                                    | Ceftazidime                  | 16                       | 64                | 2-128    | 46.9                       |
|                                                    | Cefepime                     | 8                        | >16               | 0.25->16 | 50.0                       |
|                                                    | Aztreonam                    | 32                       | 64                | 4->128   | 15.6                       |
|                                                    | Piperacillin-tazobactam      | 64                       | >128              | 4->128   | 30.2                       |
|                                                    | Doripenem                    | >4                       | >4                | 1->4     | 12.5                       |
|                                                    | Imipenem                     | >8                       | >8                | 2->8     | 19.8                       |
|                                                    | Meropenem                    | 8                        | >8                | 4->8     | 0                          |
|                                                    | Amikacin                     | 8                        | >32               | 2->32    | 59.4                       |
|                                                    | Colistin (n=69) <sup>e</sup> | 2                        | 2                 | 1-8      | 97.1                       |
|                                                    | Levofloxacin                 | >4                       | >4                | 0.25->4  | 30.2                       |
| Colistin-resistant (1) <sup>d</sup>                | Ceftazidime-avibactam        | — <sup>b</sup>           | —                 | 4        | 100                        |
|                                                    | Ceftazidime                  | —                        | —                 | 16       | 0                          |
|                                                    | Cefepime                     | —                        | —                 | >16      | 0                          |
|                                                    | Aztreonam                    | —                        | —                 | 16       | 0                          |
|                                                    | Piperacillin-tazobactam      | —                        | —                 | >128     | 0                          |
|                                                    | Doripenem                    | —                        | —                 | 2        | 100                        |
|                                                    | Imipenem                     | —                        | —                 | 2        | 100                        |
|                                                    | Meropenem                    | —                        | —                 | 8        | 0                          |
|                                                    | Amikacin                     | —                        | —                 | >32      | 0                          |
|                                                    | Colistin (n=1) <sup>e</sup>  | —                        | —                 | 8        | 0                          |
|                                                    | Levofloxacin                 | —                        | —                 | >4       | 0                          |
| Multidrug-resistant (67)                           | Ceftazidime-avibactam        | 8                        | 16                | 1->128   | 77.6                       |
|                                                    | Ceftazidime                  | 32                       | 64                | 4->128   | 16.4                       |
|                                                    | Cefepime                     | >16                      | >16               | 0.25->16 | 17.9                       |
|                                                    | Aztreonam                    | 32                       | 128               | 4->128   | 4.5                        |
|                                                    | Piperacillin-tazobactam      | >128                     | >128              | 8->128   | 6.0                        |
|                                                    | Doripenem                    | >4                       | >4                | 0.25->4  | 13.4                       |
|                                                    | Imipenem                     | >8                       | >8                | 1->8     | 34.3                       |
|                                                    | Meropenem                    | 8                        | >8                | 0.25->8  | 10.5                       |
|                                                    | Amikacin                     | >32                      | >32               | 2->32    | 38.8                       |
|                                                    | Colistin (n=46) <sup>e</sup> | 2                        | 2                 | 1-8      | 97.8                       |
|                                                    | Levofloxacin                 | >4                       | >4                | 0.25->4  | 4.5                        |
| Multidrug-resistant, MBL-negative (65)             | Ceftazidime-avibactam        | 8                        | 16                | 1-32     | 80.0                       |
|                                                    | Ceftazidime                  | 32                       | 64                | 4-128    | 16.9                       |
|                                                    | Cefepime                     | >16                      | >16               | 0.25->16 | 18.5                       |
|                                                    | Aztreonam                    | 32                       | 128               | 4->128   | 1.5                        |
|                                                    | Piperacillin-tazobactam      | >128                     | >128              | 8->128   | 4.6                        |
|                                                    | Doripenem                    | >4                       | >4                | 0.25->4  | 13.9                       |
|                                                    | Imipenem                     | >8                       | >8                | 1->8     | 35.4                       |
|                                                    | Meropenem                    | 8                        | >8                | 0.25->8  | 10.8                       |
|                                                    | Amikacin                     | >32                      | >32               | 2->32    | 38.5                       |
|                                                    | Colistin (n=45) <sup>e</sup> | 2                        | 2                 | 1-8      | 97.8                       |
|                                                    | Levofloxacin                 | >4                       | >4                | 0.25->4  | 4.6                        |

158 <sup>a</sup> MBL-negative, no gene encoding a metallo-β-lactamase was detected by polymerase chain reaction assay.

159 <sup>b</sup> —, MIC<sub>50</sub> and MIC<sub>90</sub> were not calculated for n <10 isolates.

160 <sup>c</sup> % Susceptibility was determined according to CLSI 2016 breakpoints with the exception of ceftazidime-avibactam  
161 and tigecycline where US FDA breakpoints were applied and colistin where EUCAST breakpoints were applied.

162 <sup>d</sup> All isolates were MBL-negative.

163 <sup>e</sup> Values are for colistin tested without 0.002% polysorbate-80; isolates collected in 2014-2015 only. ND, not  
164 determined; MIC range and % susceptible were not determined for n=0 isolates.  
165 <sup>f</sup> Excluded isolates of Proteeae and *Serratia* spp., which are intrinsically resistant to colistin.  
166 <sup>g</sup> No colistin-resistant isolates were collected.  
167 <sup>h</sup> *Enterobacter* spp. included *Enterobacter aerogenes* (n=48), *Enterobacter asburiae* (n=2), *Enterobacter cloacae*  
168 (n=81), and *Enterobacter kobei* (n=5).  
169 <sup>i</sup> *Citrobacter* spp. included *Citrobacter amalonaticus* (n=1), *Citrobacter braakii* (n=2), *Citrobacter farmeri* (n=1),  
170 *Citrobacter freundii* (n=45), and *Citrobacter koseri* (n=22).  
171 <sup>j</sup> No meropenem non-susceptible isolates were collected.  
172 <sup>k</sup> Proteeae included *Morganella morganii* (n=34), *Proteus mirabilis* (n=85), *Proteus penneri* (n=4), *Proteus vulgaris*  
173 (n=40), *Providencia rettgeri* (n=6), and *Providencia stuartii* (n=11).  
174 <sup>l</sup> Other *Enterobacteriaceae* included *Raoultella ornithinolytica* (n=7), *Serratia marcescens* (n=31), and *Serratia*  
175 *ureilytica* (n=1).



176 **Table S2B.** Argentina - *In vitro* activities of ceftazidime-avibactam and comparator  
 177 antimicrobial agents tested against 427 isolates of  $\beta$ -lactamase-positive *Enterobacteriaceae*  
 178 (n=312) and *P. aeruginosa* (n=115) collected as part of the INFORM global surveillance  
 179 program in 2012–2015.  
 180

| Organism/Genotype (no. of isolates) <sup>a</sup> | Antimicrobial agent          | MIC ( $\mu\text{g/ml}$ ) <sup>b</sup> |                   |                    | % Susceptible <sup>c</sup> |
|--------------------------------------------------|------------------------------|---------------------------------------|-------------------|--------------------|----------------------------|
|                                                  |                              | MIC <sub>50</sub>                     | MIC <sub>90</sub> | Range              |                            |
| <i>Enterobacteriaceae</i> (312)                  |                              |                                       |                   |                    |                            |
| OSBL-positive (14)                               | Ceftazidime-avibactam        | 0.12                                  | 0.25              | 0.06–0.5           | 100                        |
|                                                  | Ceftazidime                  | 4                                     | 32                | 0.06–32            | 57.1                       |
|                                                  | Cefepime                     | 0.5                                   | 16                | $\leq 0.12$ –>16   | 85.7                       |
|                                                  | Aztreonam                    | 0.5                                   | 16                | $\leq 0.015$ –64   | 71.4                       |
|                                                  | Piperacillin-tazobactam      | >128                                  | >128              | $\leq 0.25$ –>128  | 21.4                       |
|                                                  | Doripenem                    | 0.06                                  | 0.5               | 0.03–1             | 100                        |
|                                                  | Imipenem                     | 0.25                                  | 1                 | 0.12–8             | 92.9                       |
|                                                  | Meropenem                    | 0.03                                  | 0.25              | 0.03–2             | 92.9                       |
|                                                  | Amikacin                     | 1                                     | 4                 | 1–16               | 100                        |
|                                                  | Colistin (n=9) <sup>d</sup>  | — <sup>b</sup>                        | —                 | 0.25–>4            | 88.9                       |
|                                                  | Tigecycline                  | 0.5                                   | 1                 | 0.25–4             | 92.9                       |
|                                                  | Levofloxacin                 | 0.12                                  | >4                | 0.06–>4            | 64.3                       |
| ESBL-positive (168) <sup>e</sup>                 |                              |                                       |                   |                    |                            |
|                                                  | Ceftazidime-avibactam        | 0.25                                  | 1                 | $\leq 0.015$ –4    | 100                        |
|                                                  | Ceftazidime                  | 32                                    | >128              | 0.25–>128          | 17.9                       |
|                                                  | Cefepime                     | >16                                   | >16               | $\leq 0.12$ –>16   | 8.3                        |
|                                                  | Aztreonam                    | 64                                    | >128              | 1–>128             | 8.3                        |
|                                                  | Piperacillin-tazobactam      | 32                                    | >128              | 0.5–>128           | 47.6                       |
|                                                  | Doripenem                    | 0.06                                  | 0.12              | 0.015–>4           | 99.4                       |
|                                                  | Imipenem                     | 0.25                                  | 0.5               | 0.06–>8            | 94.0                       |
|                                                  | Meropenem                    | 0.06                                  | 0.12              | 0.015–>8           | 98.8                       |
|                                                  | Amikacin                     | 4                                     | 32                | 1–>32              | 85.1                       |
|                                                  | Colistin (n=82) <sup>d</sup> | 0.5                                   | >4                | 0.25–>4            | 87.8                       |
|                                                  | Tigecycline                  | 1                                     | 2                 | 0.06–8             | 91.1                       |
|                                                  | Levofloxacin                 | >4                                    | >4                | $\leq 0.03$ –>4    | 35.1                       |
| AmpC-positive (39) <sup>f</sup>                  |                              |                                       |                   |                    |                            |
|                                                  | Ceftazidime-avibactam        | 0.25                                  | 2                 | 0.03–32            | 94.9                       |
|                                                  | Ceftazidime                  | 32                                    | >128              | 0.06–>128          | 43.6                       |
|                                                  | Cefepime                     | 0.25                                  | 16                | $\leq 0.12$ –>16   | 82.1                       |
|                                                  | Aztreonam                    | 8                                     | 128               | $\leq 0.015$ –>128 | 46.2                       |
|                                                  | Piperacillin-tazobactam      | 4                                     | 128               | 0.5–>128           | 66.7                       |
|                                                  | Doripenem                    | 0.06                                  | 0.25              | 0.03–1             | 100                        |
|                                                  | Imipenem                     | 2                                     | 2                 | 0.12–8             | 48.7                       |
|                                                  | Meropenem                    | 0.06                                  | 0.25              | 0.03–1             | 100                        |
|                                                  | Amikacin                     | 2                                     | 16                | 1–>32              | 97.4                       |
|                                                  | Colistin (n=18) <sup>d</sup> | 1                                     | 2                 | 0.5–>4             | 94.4                       |
|                                                  | Tigecycline                  | 0.5                                   | 2                 | 0.12–4             | 94.9                       |
|                                                  | Levofloxacin                 | 0.5                                   | >4                | $\leq 0.03$ –>4    | 64.1                       |
| ESBL-positive + AmpC-positive (4) <sup>g</sup>   |                              |                                       |                   |                    |                            |
|                                                  | Ceftazidime-avibactam        | — <sup>b</sup>                        | —                 | 0.25–2             | 100                        |
|                                                  | Ceftazidime                  | —                                     | —                 | 64–>128            | 0                          |
|                                                  | Cefepime                     | —                                     | —                 | 16–>16             | 0                          |
|                                                  | Aztreonam                    | —                                     | —                 | 64–>128            | 0                          |
|                                                  | Piperacillin-tazobactam      | —                                     | —                 | 16–>128            | 25.0                       |
|                                                  | Doripenem                    | —                                     | —                 | 0.12–0.25          | 100                        |
|                                                  | Imipenem                     | —                                     | —                 | 0.06–0.25          | 100                        |
|                                                  | Meropenem                    | —                                     | —                 | 0.06–0.25          | 100                        |
|                                                  | Amikacin                     | —                                     | —                 | 2–32               | 75.0                       |
|                                                  | Colistin (n=0) <sup>d</sup>  | —                                     | —                 | ND <sup>d</sup>    | ND                         |
|                                                  | Tigecycline                  | —                                     | —                 | 0.5–2              | 100                        |
|                                                  | Levofloxacin                 | —                                     | —                 | >4–>4              | 0                          |
| KPC-positive (77) <sup>h</sup>                   |                              |                                       |                   |                    |                            |
|                                                  | Ceftazidime-avibactam        | 0.5                                   | 2                 | 0.03–16            | 98.7                       |

| Organism/Genotype (no. of isolates) <sup>a</sup> | Antimicrobial agent          | MIC ( $\mu\text{g/ml}$ ) <sup>b</sup> |                   |                  | % Susceptible <sup>c</sup> |
|--------------------------------------------------|------------------------------|---------------------------------------|-------------------|------------------|----------------------------|
|                                                  |                              | MIC <sub>50</sub>                     | MIC <sub>90</sub> | Range            |                            |
|                                                  | Ceftazidime                  | 64                                    | >128              | 2->128           | 2.6                        |
|                                                  | Cefepime                     | >16                                   | >16               | $\leq 0.12$ ->16 | 5.2                        |
|                                                  | Aztreonam                    | >128                                  | >128              | 4->128           | 1.3                        |
|                                                  | Piperacillin-tazobactam      | >128                                  | >128              | 64->128          | 0                          |
|                                                  | Doripenem                    | >4                                    | >4                | 0.5->4           | 5.2                        |
|                                                  | Imipenem                     | >8                                    | >8                | 0.5->8           | 1.3                        |
|                                                  | Meropenem                    | >8                                    | >8                | 0.5->8           | 3.9                        |
|                                                  | Amikacin                     | 16                                    | >32               | 0.5->32          | 53.2                       |
|                                                  | Colistin (n=47) <sup>d</sup> | 1                                     | >4                | 0.25->4          | 66.0                       |
|                                                  | Tigecycline                  | 1                                     | 2                 | 0.12-4           | 97.4                       |
|                                                  | Levofloxacin                 | >4                                    | >4                | 0.12->4          | 10.4                       |
| <hr/>                                            |                              |                                       |                   |                  |                            |
| OXA-48-like-positive (10) <sup>i</sup>           | Ceftazidime-avibactam        | 1                                     | 2                 | 0.06-8           | 90.0                       |
|                                                  | Ceftazidime                  | 128                                   | >128              | 16->128          | 0                          |
|                                                  | Cefepime                     | >16                                   | >16               | 2->16            | 10.0                       |
|                                                  | Aztreonam                    | 64                                    | 64                | 1->128           | 10.0                       |
|                                                  | Piperacillin-tazobactam      | >128                                  | >128              | 64->128          | 0                          |
|                                                  | Doripenem                    | 0.12                                  | >4                | 0.06->4          | 80.0                       |
|                                                  | Imipenem                     | 0.5                                   | 1                 | 0.12-2           | 90.0                       |
|                                                  | Meropenem                    | 0.12                                  | >8                | 0.03->8          | 80.0                       |
|                                                  | Amikacin                     | 8                                     | 32                | 1->32            | 70.0                       |
|                                                  | Colistin (n=9) <sup>d</sup>  | — <sup>b</sup>                        | —                 | 0.5-1            | 100                        |
|                                                  | Tigecycline                  | 1                                     | 1                 | 0.12-2           | 100                        |
|                                                  | Levofloxacin                 | >4                                    | >4                | 0.06->4          | 20.0                       |
| <hr/>                                            |                              |                                       |                   |                  |                            |
| <i>P. aeruginosa</i> (115)                       |                              |                                       |                   |                  |                            |
| OSBL-positive (1) <sup>j</sup>                   | Ceftazidime-avibactam        | — <sup>b</sup>                        | —                 | 4                | 100                        |
|                                                  | Ceftazidime                  | —                                     | —                 | 4                | 100                        |
|                                                  | Cefepime                     | —                                     | —                 | 8                | 100                        |
|                                                  | Aztreonam                    | —                                     | —                 | 32               | 0                          |
|                                                  | Piperacillin-tazobactam      | —                                     | —                 | 64               | 0                          |
|                                                  | Doripenem                    | —                                     | —                 | >4               | 0                          |
|                                                  | Imipenem                     | —                                     | —                 | >8               | 0                          |
|                                                  | Meropenem                    | —                                     | —                 | >8               | 0                          |
|                                                  | Amikacin                     | —                                     | —                 | >32              | 0                          |
|                                                  | Colistin (n=0) <sup>d</sup>  | —                                     | —                 | ND <sup>d</sup>  | ND                         |
|                                                  | Levofloxacin                 | —                                     | —                 | >4               | 0                          |
| <hr/>                                            |                              |                                       |                   |                  |                            |
| ESBL-positive (1) <sup>j,k</sup>                 | Ceftazidime-avibactam        | — <sup>b</sup>                        | —                 | 8                | 100                        |
|                                                  | Ceftazidime                  | —                                     | —                 | 128              | 0                          |
|                                                  | Cefepime                     | —                                     | —                 | 16               | 0                          |
|                                                  | Aztreonam                    | —                                     | —                 | 16               | 0                          |
|                                                  | Piperacillin-tazobactam      | —                                     | —                 | 64               | 0                          |
|                                                  | Doripenem                    | —                                     | —                 | 2                | 100                        |
|                                                  | Imipenem                     | —                                     | —                 | >8               | 0                          |
|                                                  | Meropenem                    | —                                     | —                 | 4                | 0                          |
|                                                  | Amikacin                     | —                                     | —                 | >32              | 0                          |
|                                                  | Colistin (n=1) <sup>d</sup>  | —                                     | —                 | 4                | 0                          |
|                                                  | Levofloxacin                 | —                                     | —                 | 2                | 100                        |
| <hr/>                                            |                              |                                       |                   |                  |                            |
| KPC-positive (3) <sup>j,l</sup>                  | Ceftazidime-avibactam        | — <sup>b</sup>                        | —                 | 4-8              | 100                        |
|                                                  | Ceftazidime                  | —                                     | —                 | 64-128           | 0                          |
|                                                  | Cefepime                     | —                                     | —                 | 0.5->16          | 33.3                       |
|                                                  | Aztreonam                    | —                                     | —                 | >128->128        | 0                          |
|                                                  | Piperacillin-tazobactam      | —                                     | —                 | >128->128        | 0                          |
|                                                  | Doripenem                    | —                                     | —                 | >4->4            | 0                          |
|                                                  | Imipenem                     | —                                     | —                 | >8->8            | 0                          |
|                                                  | Meropenem                    | —                                     | —                 | >8->8            | 0                          |
|                                                  | Amikacin                     | —                                     | —                 | 4-16             | 100                        |
|                                                  | Colistin (n=2) <sup>d</sup>  | —                                     | —                 | 1-2              | 100                        |
|                                                  | Levofloxacin                 | —                                     | —                 | >4->4            | 0                          |
| <hr/>                                            |                              |                                       |                   |                  |                            |
| MBL-positive (2) <sup>j,m</sup>                  | Ceftazidime-avibactam        | — <sup>b</sup>                        | —                 | 64->128          | 0                          |

| Organism/Genotype (no. of isolates) <sup>a</sup>           | Antimicrobial agent          | MIC ( $\mu\text{g/ml}$ ) <sup>b</sup> |                   |                  | % Susceptible <sup>c</sup> |
|------------------------------------------------------------|------------------------------|---------------------------------------|-------------------|------------------|----------------------------|
|                                                            |                              | MIC <sub>50</sub>                     | MIC <sub>90</sub> | Range            |                            |
|                                                            | Ceftazidime                  | —                                     | —                 | 64->128          | 0                          |
|                                                            | Cefepime                     | —                                     | —                 | >16->16          | 0                          |
|                                                            | Aztreonam                    | —                                     | —                 | 4-8              | 100                        |
|                                                            | Piperacillin-tazobactam      | —                                     | —                 | 16->128          | 50.0                       |
|                                                            | Doripenem                    | —                                     | —                 | >4->4            | 0                          |
|                                                            | Imipenem                     | —                                     | —                 | >8->8            | 0                          |
|                                                            | Meropenem                    | —                                     | —                 | >8->8            | 0                          |
|                                                            | Amikacin                     | —                                     | —                 | 8->32            | 50.0                       |
|                                                            | Colistin (n=1) <sup>d</sup>  | —                                     | —                 | 2                | 100                        |
|                                                            | Levofloxacin                 | —                                     | —                 | >4->4            | 0                          |
| No acquired $\beta$ -lactamase detected (108) <sup>j</sup> | Ceftazidime-avibactam        | 4                                     | 16                | 0.5-32           | 88.0                       |
|                                                            | Ceftazidime                  | 8                                     | 64                | 1-128            | 55.6                       |
|                                                            | Cefepime                     | 8                                     | >16               | 0.25->16         | 57.4                       |
|                                                            | Aztreonam                    | 32                                    | 64                | 0.25->128        | 28.7                       |
|                                                            | Piperacillin-tazobactam      | 32                                    | >128              | $\leq$ 0.25->128 | 40.7                       |
|                                                            | Doripenem                    | 4                                     | >4                | 0.12->4          | 25.9                       |
|                                                            | Imipenem                     | >8                                    | >8                | 2->8             | 17.6                       |
|                                                            | Meropenem                    | 8                                     | >8                | $\leq$ 0.06->8   | 15.7                       |
|                                                            | Amikacin                     | 8                                     | >32               | 1->32            | 64.8                       |
|                                                            | Colistin (n=75) <sup>d</sup> | 2                                     | 2                 | 1-8              | 98.7                       |
|                                                            | Levofloxacin                 | >4                                    | >4                | $\leq$ 0.03->4   | 35.2                       |

181 <sup>a</sup> OSBL, original-spectrum  $\beta$ -lactamase (e.g., TEM-1, SHV-1, SHV-11); ESBL, extended-spectrum  $\beta$ -lactamase;  
182 MBL, metallo- $\beta$ -lactamase.

183 <sup>b</sup> —, MIC<sub>50</sub> and MIC<sub>90</sub> were not calculated for n <10 isolates.

184 <sup>c</sup> % Susceptibility was determined according to CLSI 2016 breakpoints with the exception of ceftazidime-avibactam  
185 and tigecycline where US FDA breakpoints were applied and colistin where EUCAST breakpoints were applied.

186 <sup>d</sup> Values are for colistin tested without 0.002% polysorbate-80; isolates collected in 2014-2015 only. ND, not  
187 determined; MIC range and % susceptible were not determined for n=0 isolates.

188 <sup>e</sup> Included isolates carrying CTX-M-2; CTX-M-14; CTX-M-15; CTX-M-3 and SHV-2; CTX-M-3 and SHV-5;  
189 CTX-M-3 and SHV-12; CTX-M-14 and CTX-M-15; CTX-M-15 and CTX-M-2; CTX-M-15 and SHV-5; CTX-M-  
190 15 and SHV-7; SHV-2; SHV-2A; SHV-5; SHV-12; SHV-18; SHV-28; TEM-28; GES-7; and the chromosomal  
191 ESBL common to *K. oxytoca*, with or without a SHV-OSBL and/or TEM-OSBL.

192 <sup>f</sup> Included isolates carrying CMY-2; CMY-132; CMY-type; or the chromosomal AmpCs common to *Citrobacter*  
193 spp., *Enterobacter* spp., *M. organii*, and *Serratia* spp. with or without a TEM-OSBL.

194 <sup>g</sup> Included isolates carrying the chromosomal AmpC common to *Enterobacter* spp. and CTX-M-2, CTX-M-15 or  
195 SHV-5 with a TEM-OSBL.

196 <sup>h</sup> Included isolates carrying KPC-2; KPC-3; KPC-2 and CTX-M-2; KPC-2 and CTX-M-15; KPC-2 and SHV-12;  
197 KPC-3 and SHV-12; KPC-2 and CTX-M-2 and OXA-163; with and without the chromosomal  $\beta$ -lactamases  
198 common to *Enterobacter* spp., *M. organii*, *S. marcescens* and *K. oxytoca*, a SHV-OSBL, and/or TEM-OSBL.

199 <sup>i</sup> Included isolates carrying OXA-439; OXA-163; OXA-163 and CTX-M-15; OXA-163 and SHV-2A; OXA-163 and  
200 the chromosomal AmpC common to *Enterobacter* spp.; with and without a SHV-OSBL and/or TEM-OSBL.

201 <sup>j</sup> Assumed to carry the chromosomal AmpC common to *P. aeruginosa*.

202 <sup>k</sup> Isolate carrying GES-1.

203 <sup>l</sup> Isolates carrying KPC-2.

204 <sup>m</sup> Isolates carrying IMP-16 or VIM-2.

205 **Table S3A.** Brazil - *In vitro* activities of ceftazidime-avibactam and comparator antimicrobial  
 206 agents tested against 1,391 isolates of *Enterobacteriaceae* and *P. aeruginosa* collected as part of  
 207 the INFORM global surveillance program in 2012-2015.  
 208

| Organism, phenotype (no. of isolates) <sup>a</sup> | Antimicrobial agent                            | MIC (µg/ml) <sup>b</sup> |                   |             | % Susceptible <sup>c</sup> |      |
|----------------------------------------------------|------------------------------------------------|--------------------------|-------------------|-------------|----------------------------|------|
|                                                    |                                                | MIC <sub>50</sub>        | MIC <sub>90</sub> | Range       |                            |      |
| <i>Enterobacteriaceae</i>                          |                                                |                          |                   |             |                            |      |
| All (1,115) <sup>d</sup>                           | Ceftazidime-avibactam                          | 0.12                     | 1                 | ≤0.015-→128 | 99.9                       |      |
|                                                    | Ceftazidime                                    | 0.25                     | 128               | 0.03-→128   | 71.8                       |      |
|                                                    | Cefepime                                       | ≤0.12                    | >16               | ≤0.12-→16   | 67.6                       |      |
|                                                    | Aztreonam                                      | 0.12                     | 128               | ≤0.015-→128 | 67.7                       |      |
|                                                    | Piperacillin-tazobactam                        | 2                        | >128              | ≤0.25-→128  | 78.0                       |      |
|                                                    | Doripenem                                      | 0.06                     | 1                 | ≤0.008-→4   | 90.2                       |      |
|                                                    | Imipenem                                       | 0.25                     | 4                 | ≤0.03-→8    | 79.9                       |      |
|                                                    | Meropenem                                      | 0.03                     | 2                 | 0.015-→8    | 89.8                       |      |
|                                                    | Amikacin                                       | 2                        | 8                 | ≤0.25-→32   | 96.8                       |      |
|                                                    | Colistin (n=711) <sup>e</sup>                  | 1                        | >4                | ≤0.12-→4    | 83.1                       |      |
|                                                    | Tigecycline                                    | 0.5                      | 2                 | ≤0.015-8    | 95.2                       |      |
|                                                    | Levofloxacin                                   | 0.25                     | >4                | ≤0.03-→4    | 62.6                       |      |
|                                                    | Ceftazidime non-susceptible (314) <sup>d</sup> | Ceftazidime-avibactam    | 0.5               | 2           | ≤0.015-→128                | 99.7 |
|                                                    |                                                | Ceftazidime              | 64                | >128        | 8-→128                     | 0    |
| Cefepime                                           |                                                | >16                      | >16               | ≤0.12-→16   | 13.7                       |      |
| Aztreonam                                          |                                                | 128                      | >128              | 0.12-→128   | 2.6                        |      |
| Piperacillin-tazobactam                            |                                                | 128                      | >128              | ≤0.25-→128  | 28.3                       |      |
| Doripenem                                          |                                                | 0.12                     | >4                | 0.03-→4     | 66.9                       |      |
| Imipenem                                           |                                                | 0.5                      | >8                | 0.06-→8     | 65.3                       |      |
| Meropenem                                          |                                                | 0.12                     | >8                | 0.015-→8    | 65.0                       |      |
| Amikacin                                           |                                                | 4                        | 16                | 0.5-→32     | 90.5                       |      |
| Colistin (n=185) <sup>e</sup>                      |                                                | 1                        | >4                | ≤0.12-→4    | 86.0                       |      |
| Tigecycline                                        |                                                | 0.5                      | 2                 | 0.06-8      | 94.9                       |      |
| Levofloxacin                                       |                                                | >4                       | >4                | ≤0.03-→4    | 23.3                       |      |
| Meropenem non-susceptible (114) <sup>d</sup>       |                                                | Ceftazidime-avibactam    | 1                 | 2           | 0.06-→128                  | 99.1 |
|                                                    |                                                | Ceftazidime              | 64                | >128        | 0.12-→128                  | 3.5  |
|                                                    | Cefepime                                       | >16                      | >16               | ≤0.12-→16   | 5.3                        |      |
|                                                    | Aztreonam                                      | >128                     | >128              | 0.06-→128   | 3.5                        |      |
|                                                    | Piperacillin-tazobactam                        | >128                     | >128              | 1-→128      | 4.4                        |      |
|                                                    | Doripenem                                      | >4                       | >4                | 0.12-→4     | 6.1                        |      |
|                                                    | Imipenem                                       | >8                       | >8                | 0.25-→8     | 10.5                       |      |
|                                                    | Meropenem                                      | >8                       | >8                | 2-→8        | 0                          |      |
|                                                    | Amikacin                                       | 4                        | >32               | 0.5-→32     | 80.7                       |      |
|                                                    | Colistin (n=72) <sup>e</sup>                   | 1                        | >4                | 0.25-→4     | 73.6                       |      |
|                                                    | Tigecycline                                    | 1                        | 2                 | 0.25-8      | 91.2                       |      |
|                                                    | Levofloxacin                                   | >4                       | >4                | ≤0.03-→4    | 8.8                        |      |
|                                                    | Colistin-resistant (23) <sup>d,f</sup>         | Ceftazidime-avibactam    | 0.5               | 2           | 0.06-→128                  | 95.7 |
|                                                    |                                                | Ceftazidime              | 64                | >128        | 0.12-→128                  | 13.0 |
| Cefepime                                           |                                                | >16                      | >16               | ≤0.12-→16   | 17.4                       |      |
| Aztreonam                                          |                                                | >128                     | >128              | 0.12-→128   | 13.0                       |      |
| Piperacillin-tazobactam                            |                                                | >128                     | >128              | 2-→128      | 21.7                       |      |
| Doripenem                                          |                                                | >4                       | >4                | 0.03-→4     | 17.4                       |      |
| Imipenem                                           |                                                | >8                       | >8                | 0.25-→8     | 17.4                       |      |
| Meropenem                                          |                                                | >8                       | >8                | 0.03-→8     | 17.4                       |      |
| Amikacin                                           |                                                | 4                        | 32                | 1-→32       | 78.3                       |      |
| Colistin (n=23) <sup>e</sup>                       |                                                | >4                       | >4                | 4-→4        | 0                          |      |
| Tigecycline                                        |                                                | 1                        | 4                 | 0.25-4      | 87.0                       |      |
| Levofloxacin                                       |                                                | >4                       | >4                | 0.06-→4     | 17.4                       |      |
| Multidrug-resistant (260) <sup>d</sup>             |                                                | Ceftazidime-avibactam    | 0.5               | 2           | 0.06-→128                  | 99.6 |
|                                                    |                                                | Ceftazidime              | 64                | >128        | 0.12-→128                  | 6.9  |
|                                                    | Cefepime                                       | >16                      | >16               | ≤0.12-→16   | 0.8                        |      |

| Organism, phenotype (no. of isolates) <sup>a</sup> | Antimicrobial agent                           | MIC (µg/ml) <sup>b</sup> |                   |             | % Susceptible <sup>c</sup> |      |
|----------------------------------------------------|-----------------------------------------------|--------------------------|-------------------|-------------|----------------------------|------|
|                                                    |                                               | MIC <sub>50</sub>        | MIC <sub>90</sub> | Range       |                            |      |
|                                                    | Aztreonam                                     | 128                      | >128              | ≤0.015->128 | 1.2                        |      |
|                                                    | Piperacillin-tazobactam                       | >128                     | >128              | ≤0.25->128  | 26.9                       |      |
|                                                    | Doripenem                                     | 0.25                     | >4                | 0.015->4    | 60.0                       |      |
|                                                    | Imipenem                                      | 0.5                      | >8                | 0.06->8     | 60.4                       |      |
|                                                    | Meropenem                                     | 0.25                     | >8                | 0.015->8    | 58.9                       |      |
|                                                    | Amikacin                                      | 4                        | 32                | 0.5->32     | 87.7                       |      |
|                                                    | Colistin (n=149) <sup>e</sup>                 | 1                        | >4                | ≤0.12->4    | 81.2                       |      |
|                                                    | Tigecycline                                   | 1                        | 2                 | ≤0.015-8    | 93.9                       |      |
|                                                    | Levofloxacin                                  | >4                       | >4                | 0.06->4     | 5.8                        |      |
|                                                    | <hr/>                                         |                          |                   |             |                            |      |
| <i>Escherichia coli</i> <sup>g</sup>               |                                               |                          |                   |             |                            |      |
| All (416) <sup>d</sup>                             | Ceftazidime-avibactam                         | 0.12                     | 0.25              | ≤0.015-4    | 100                        |      |
|                                                    | Ceftazidime                                   | 0.25                     | 16                | 0.03->128   | 86.3                       |      |
|                                                    | Cefepime                                      | ≤0.12                    | >16               | ≤0.12->16   | 73.3                       |      |
|                                                    | Aztreonam                                     | 0.12                     | 32                | ≤0.015->128 | 77.9                       |      |
|                                                    | Piperacillin-tazobactam                       | 2                        | 16                | 0.5->128    | 93.5                       |      |
|                                                    | Doripenem                                     | 0.03                     | 0.06              | ≤0.008->4   | 99.0                       |      |
|                                                    | Imipenem                                      | 0.12                     | 0.25              | ≤0.03-8     | 98.8                       |      |
|                                                    | Meropenem                                     | 0.03                     | 0.06              | 0.015-8     | 99.0                       |      |
|                                                    | Amikacin                                      | 2                        | 8                 | 0.5-32      | 99.8                       |      |
|                                                    | Colistin (n=266) <sup>e</sup>                 | 0.5                      | 1                 | ≤0.12-2     | 100                        |      |
|                                                    | Tigecycline                                   | 0.25                     | 0.5               | ≤0.015-2    | 100                        |      |
|                                                    | Levofloxacin                                  | 0.5                      | >4                | ≤0.03->4    | 58.4                       |      |
|                                                    | Ceftazidime non-susceptible (57) <sup>d</sup> | Ceftazidime-avibactam    | 0.25              | 1           | ≤0.015-4                   | 100  |
|                                                    |                                               | Ceftazidime              | 32                | 128         | 8->128                     | 0    |
|                                                    |                                               | Cefepime                 | >16               | >16         | ≤0.12->16                  | 14.0 |
| Aztreonam                                          |                                               | 64                       | 128               | 4->128      | 3.5                        |      |
| Piperacillin-tazobactam                            |                                               | 16                       | >128              | 2->128      | 68.4                       |      |
| Doripenem                                          |                                               | 0.03                     | 0.12              | 0.03->4     | 93.0                       |      |
| Imipenem                                           |                                               | 0.25                     | 0.5               | 0.06-8      | 94.7                       |      |
| Meropenem                                          |                                               | 0.03                     | 0.25              | 0.015-8     | 93.0                       |      |
| Amikacin                                           |                                               | 4                        | 16                | 1-16        | 100                        |      |
| Colistin (n=31) <sup>e</sup>                       |                                               | 0.5                      | 1                 | ≤0.12-2     | 100                        |      |
| Tigecycline                                        |                                               | 0.25                     | 0.5               | 0.06-2      | 100                        |      |
| Levofloxacin                                       |                                               | >4                       | >4                | ≤0.03->4    | 14.0                       |      |
| Meropenem non-susceptible (4) <sup>d</sup>         |                                               | Ceftazidime-avibactam    | — <sup>b</sup>    | —           | 0.5-4                      | 100  |
|                                                    | Ceftazidime                                   | —                        | —                 | 16-32       | 0                          |      |
|                                                    | Cefepime                                      | —                        | —                 | >16->16     | 0                          |      |
|                                                    | Aztreonam                                     | —                        | —                 | 64->128     | 0                          |      |
|                                                    | Piperacillin-tazobactam                       | —                        | —                 | >128->128   | 0                          |      |
|                                                    | Doripenem                                     | —                        | —                 | 2->4        | 0                          |      |
|                                                    | Imipenem                                      | —                        | —                 | 1-8         | 50.0                       |      |
|                                                    | Meropenem                                     | —                        | —                 | 4-8         | 0                          |      |
|                                                    | Amikacin                                      | —                        | —                 | 4-8         | 100                        |      |
|                                                    | Colistin (n=1) <sup>e</sup>                   | —                        | —                 | 1           | 100                        |      |
|                                                    | Tigecycline                                   | —                        | —                 | 0.5-0.5     | 100                        |      |
|                                                    | Levofloxacin                                  | —                        | —                 | >4->4       | 0                          |      |
|                                                    | Multidrug-resistant (54) <sup>d</sup>         | Ceftazidime-avibactam    | 0.25              | 1           | 0.06-4                     | 100  |
| Ceftazidime                                        |                                               | 16                       | 128               | 1->128      | 20.4                       |      |
| Cefepime                                           |                                               | >16                      | >16               | 4->16       | 0                          |      |
| Aztreonam                                          |                                               | 64                       | 128               | 16->128     | 0                          |      |
| Piperacillin-tazobactam                            |                                               | 16                       | >128              | 2->128      | 68.5                       |      |
| Doripenem                                          |                                               | 0.03                     | 0.12              | 0.015->4    | 92.6                       |      |
| Imipenem                                           |                                               | 0.25                     | 0.5               | 0.06-8      | 94.4                       |      |
| Meropenem                                          |                                               | 0.03                     | 0.25              | 0.015-8     | 92.6                       |      |
| Amikacin                                           |                                               | 4                        | 16                | 1-16        | 100                        |      |
| Colistin (n=27) <sup>e</sup>                       |                                               | 0.5                      | 1                 | ≤0.12-2     | 100                        |      |
| Tigecycline                                        |                                               | 0.25                     | 0.5               | ≤0.015-2    | 100                        |      |
| Levofloxacin                                       |                                               | >4                       | >4                | 0.5->4      | 1.9                        |      |

*Klebsiella pneumoniae*

| Organism, phenotype (no. of isolates) <sup>a</sup> | Antimicrobial agent                            | MIC (µg/ml) <sup>b</sup> |                   |             | % Susceptible <sup>c</sup> |      |
|----------------------------------------------------|------------------------------------------------|--------------------------|-------------------|-------------|----------------------------|------|
|                                                    |                                                | MIC <sub>50</sub>        | MIC <sub>90</sub> | Range       |                            |      |
| All (317) <sup>d</sup>                             | Ceftazidime-avibactam                          | 0.25                     | 2                 | ≤0.015->128 | 99.7                       |      |
|                                                    | Ceftazidime                                    | 16                       | >128              | 0.06->128   | 42.9                       |      |
|                                                    | Cefepime                                       | 16                       | >16               | ≤0.12->16   | 42.6                       |      |
|                                                    | Aztreonam                                      | 64                       | >128              | ≤0.015->128 | 41.3                       |      |
|                                                    | Piperacillin-tazobactam                        | 32                       | >128              | 0.5->128    | 48.9                       |      |
|                                                    | Doripenem                                      | 0.06                     | >4                | 0.015->4    | 69.7                       |      |
|                                                    | Imipenem                                       | 0.25                     | >8                | 0.06->8     | 71.0                       |      |
|                                                    | Meropenem                                      | 0.06                     | >8                | 0.015->8    | 67.8                       |      |
|                                                    | Amikacin                                       | 2                        | 16                | 0.5->32     | 91.2                       |      |
|                                                    | Colistin (n=207) <sup>e</sup>                  | 1                        | 2                 | 0.25->4     | 90.3                       |      |
|                                                    | Tigecycline                                    | 0.5                      | 2                 | 0.12-8      | 96.2                       |      |
|                                                    | Levofloxacin                                   | >4                       | >4                | ≤0.03->4    | 42.6                       |      |
|                                                    | Ceftazidime non-susceptible (181) <sup>d</sup> | Ceftazidime-avibactam    | 0.5               | 2           | 0.06->128                  | 99.5 |
|                                                    |                                                | Ceftazidime              | 64                | >128        | 8->128                     | 0    |
| Cefepime                                           |                                                | >16                      | >16               | ≤0.12->16   | 3.9                        |      |
| Aztreonam                                          |                                                | 128                      | >128              | 16->128     | 0                          |      |
| Piperacillin-tazobactam                            |                                                | >128                     | >128              | 1->128      | 14.4                       |      |
| Doripenem                                          |                                                | 2                        | >4                | 0.03->4     | 48.1                       |      |
| Imipenem                                           |                                                | 2                        | >8                | 0.06->8     | 49.7                       |      |
| Meropenem                                          |                                                | 4                        | >8                | 0.03->8     | 44.8                       |      |
| Amikacin                                           |                                                | 4                        | 32                | 0.5->32     | 85.1                       |      |
| Colistin (n=110) <sup>e</sup>                      |                                                | 1                        | >4                | 0.25->4     | 82.7                       |      |
| Tigecycline                                        |                                                | 1                        | 2                 | 0.12-8      | 93.9                       |      |
| Levofloxacin                                       |                                                | >4                       | >4                | ≤0.03->4    | 8.8                        |      |
| Meropenem non-susceptible (102) <sup>d</sup>       |                                                | Ceftazidime-avibactam    | 1                 | 2           | 0.12->128                  | 99.0 |
|                                                    |                                                | Ceftazidime              | 64                | >128        | 1->128                     | 2.0  |
|                                                    | Cefepime                                       | >16                      | >16               | ≤0.12->16   | 3.9                        |      |
|                                                    | Aztreonam                                      | >128                     | >128              | 0.5->128    | 2.0                        |      |
|                                                    | Piperacillin-tazobactam                        | >128                     | >128              | 2->128      | 2.9                        |      |
|                                                    | Doripenem                                      | >4                       | >4                | 1->4        | 5.9                        |      |
|                                                    | Imipenem                                       | >8                       | >8                | 0.25->8     | 9.8                        |      |
|                                                    | Meropenem                                      | >8                       | >8                | 2->8        | 0                          |      |
|                                                    | Amikacin                                       | 4                        | >32               | 0.5->32     | 78.4                       |      |
|                                                    | Colistin (n=65) <sup>e</sup>                   | 1                        | >4                | 0.25->4     | 72.3                       |      |
|                                                    | Tigecycline                                    | 1                        | 2                 | 0.25-8      | 90.2                       |      |
|                                                    | Levofloxacin                                   | >4                       | >4                | ≤0.03->4    | 4.9                        |      |
|                                                    | Colistin-resistant (20) <sup>d</sup>           | Ceftazidime-avibactam    | 0.5               | 2           | 0.25->128                  | 95.0 |
|                                                    |                                                | Ceftazidime              | 64                | >128        | 0.5->128                   | 5.0  |
| Cefepime                                           |                                                | >16                      | >16               | ≤0.12->16   | 5.0                        |      |
| Aztreonam                                          |                                                | >128                     | >128              | 0.12->128   | 5.0                        |      |
| Piperacillin-tazobactam                            |                                                | >128                     | >128              | 4->128      | 10.0                       |      |
| Doripenem                                          |                                                | >4                       | >4                | 0.06->4     | 10.0                       |      |
| Imipenem                                           |                                                | >8                       | >8                | 0.25->8     | 10.0                       |      |
| Meropenem                                          |                                                | >8                       | >8                | 0.06->8     | 10.0                       |      |
| Amikacin                                           |                                                | 4                        | 32                | 1->32       | 75.0                       |      |
| Colistin (n=20) <sup>e</sup>                       |                                                | >4                       | >4                | 4->4        | 0                          |      |
| Tigecycline                                        |                                                | 1                        | 4                 | 0.5-4       | 85.0                       |      |
| Levofloxacin                                       |                                                | >4                       | >4                | 0.12->4     | 5.0                        |      |
| Multidrug-resistant (168) <sup>d</sup>             |                                                | Ceftazidime-avibactam    | 0.5               | 2           | 0.12->128                  | 99.4 |
|                                                    |                                                | Ceftazidime              | 64                | >128        | 4->128                     | 0.6  |
|                                                    | Cefepime                                       | >16                      | >16               | ≤0.12->16   | 0.6                        |      |
|                                                    | Aztreonam                                      | 128                      | >128              | 16->128     | 0                          |      |
|                                                    | Piperacillin-tazobactam                        | >128                     | >128              | 2->128      | 11.9                       |      |
|                                                    | Doripenem                                      | 2                        | >4                | 0.03->4     | 44.1                       |      |
|                                                    | Imipenem                                       | 4                        | >8                | 0.06->8     | 47.0                       |      |
|                                                    | Meropenem                                      | 4                        | >8                | 0.03->8     | 41.7                       |      |
|                                                    | Amikacin                                       | 4                        | 32                | 0.5->32     | 83.9                       |      |
|                                                    | Colistin (n=101) <sup>e</sup>                  | 1                        | >4                | 0.25->4     | 81.2                       |      |
|                                                    | Tigecycline                                    | 1                        | 2                 | 0.12-8      | 93.5                       |      |
|                                                    | Levofloxacin                                   | >4                       | >4                | 0.06->4     | 3.0                        |      |

| Organism, phenotype (no. of isolates) <sup>a</sup> | Antimicrobial agent                          | MIC (µg/ml) <sup>b</sup> |                   |             | % Susceptible <sup>c</sup> |
|----------------------------------------------------|----------------------------------------------|--------------------------|-------------------|-------------|----------------------------|
|                                                    |                                              | MIC <sub>50</sub>        | MIC <sub>90</sub> | Range       |                            |
| <i>Klebsiella oxytoca</i> <sup>g</sup>             |                                              |                          |                   |             |                            |
| All (39) <sup>d</sup>                              | Ceftazidime-avibactam                        | 0.12                     | 0.25              | ≤0.015–1    | 100                        |
|                                                    | Ceftazidime                                  | 0.12                     | 4                 | 0.03–>128   | 92.3                       |
|                                                    | Cefepime                                     | ≤0.12                    | 4                 | ≤0.12–>16   | 89.7                       |
|                                                    | Aztreonam                                    | 0.12                     | 128               | ≤0.015–>128 | 87.2                       |
|                                                    | Piperacillin-tazobactam                      | 2                        | 128               | 1–>128      | 89.7                       |
|                                                    | Doripenem                                    | 0.06                     | 0.06              | 0.03–>4     | 94.9                       |
|                                                    | Imipenem                                     | 0.25                     | 0.5               | 0.12–8      | 94.9                       |
|                                                    | Meropenem                                    | 0.03                     | 0.06              | 0.03–4      | 94.9                       |
|                                                    | Amikacin                                     | 1                        | 2                 | 1–16        | 100                        |
|                                                    | Colistin (n=28) <sup>e</sup>                 | 0.5                      | 1                 | 0.25–1      | 100                        |
|                                                    | Tigecycline                                  | 0.25                     | 1                 | 0.25–2      | 100                        |
|                                                    | Levofloxacin                                 | 0.06                     | 4                 | ≤0.03–>4    | 89.7                       |
|                                                    | Ceftazidime non-susceptible (3) <sup>d</sup> | Ceftazidime-avibactam    | — <sup>b</sup>    | —           | 0.25–1                     |
| Ceftazidime                                        |                                              | —                        | —                 | 32–>128     | 0                          |
| Cefepime                                           |                                              | —                        | —                 | 16–>16      | 0                          |
| Aztreonam                                          |                                              | —                        | —                 | 128–>128    | 0                          |
| Piperacillin-tazobactam                            |                                              | —                        | —                 | 128–>128    | 0                          |
| Doripenem                                          |                                              | —                        | —                 | 0.12–>4     | 33.3                       |
| Imipenem                                           |                                              | —                        | —                 | 0.25–8      | 33.3                       |
| Meropenem                                          |                                              | —                        | —                 | 0.12–4      | 33.3                       |
| Amikacin                                           |                                              | —                        | —                 | 1–16        | 100                        |
| Colistin (n=2) <sup>e</sup>                        |                                              | —                        | —                 | 0.5–1       | 100                        |
| Tigecycline                                        |                                              | —                        | —                 | 0.5–2       | 100                        |
| Levofloxacin                                       |                                              | —                        | —                 | 0.06–>4     | 33.3                       |
| Meropenem non-susceptible (2) <sup>d</sup>         |                                              | Ceftazidime-avibactam    | — <sup>b</sup>    | —           | 0.25–1                     |
|                                                    | Ceftazidime                                  | —                        | —                 | 32–64       | 0                          |
|                                                    | Cefepime                                     | —                        | —                 | 16–>16      | 0                          |
|                                                    | Aztreonam                                    | —                        | —                 | 128–>128    | 0                          |
|                                                    | Piperacillin-tazobactam                      | —                        | —                 | 128–>128    | 0                          |
|                                                    | Doripenem                                    | —                        | —                 | 2–>4        | 0                          |
|                                                    | Imipenem                                     | —                        | —                 | 4–8         | 0                          |
|                                                    | Meropenem                                    | —                        | —                 | 4–4         | 0                          |
|                                                    | Amikacin                                     | —                        | —                 | 1–8         | 100                        |
|                                                    | Colistin (n=2) <sup>e</sup>                  | —                        | —                 | 0.5–1       | 100                        |
|                                                    | Tigecycline                                  | —                        | —                 | 0.5–2       | 100                        |
|                                                    | Levofloxacin                                 | —                        | —                 | 0.06–>4     | 50.0                       |
|                                                    | Multidrug-resistant (3) <sup>d</sup>         | Ceftazidime-avibactam    | — <sup>b</sup>    | —           | 0.25–1                     |
| Ceftazidime                                        |                                              | —                        | —                 | 32–>128     | 0                          |
| Cefepime                                           |                                              | —                        | —                 | 16–>16      | 0                          |
| Aztreonam                                          |                                              | —                        | —                 | 128–>128    | 0                          |
| Piperacillin-tazobactam                            |                                              | —                        | —                 | 128–>128    | 0                          |
| Doripenem                                          |                                              | —                        | —                 | 0.12–>4     | 33.3                       |
| Imipenem                                           |                                              | —                        | —                 | 0.25–8      | 33.3                       |
| Meropenem                                          |                                              | —                        | —                 | 0.12–4      | 33.3                       |
| Amikacin                                           |                                              | —                        | —                 | 1–16        | 100                        |
| Colistin (n=2) <sup>e</sup>                        |                                              | —                        | —                 | 0.5–1       | 100                        |
| Tigecycline                                        |                                              | —                        | —                 | 0.5–2       | 100                        |
| Levofloxacin                                       |                                              | —                        | —                 | 0.06–>4     | 33.3                       |
| <i>Enterobacter</i> spp.                           |                                              |                          |                   |             |                            |
| All (130) <sup>d,h</sup>                           | Ceftazidime-avibactam                        | 0.25                     | 1                 | 0.06–2      | 100                        |
|                                                    | Ceftazidime                                  | 0.5                      | 128               | 0.12–>128   | 60.0                       |
|                                                    | Cefepime                                     | ≤0.12                    | >16               | ≤0.12–>16   | 67.7                       |
|                                                    | Aztreonam                                    | 0.25                     | 128               | ≤0.015–>128 | 58.5                       |
|                                                    | Piperacillin-tazobactam                      | 4                        | >128              | 1–>128      | 68.5                       |
|                                                    | Doripenem                                    | 0.06                     | 0.25              | 0.03–>4     | 96.2                       |
|                                                    | Imipenem                                     | 1                        | 2                 | 0.12–>8     | 79.2                       |
|                                                    | Meropenem                                    | 0.06                     | 0.25              | 0.015–>8    | 95.4                       |
|                                                    | Amikacin                                     | 1                        | 8                 | 0.5–32      | 97.7                       |

| Organism, phenotype (no. of isolates) <sup>a</sup> | Antimicrobial agent          | MIC (µg/ml) <sup>b</sup> |                   |            | % Susceptible <sup>c</sup> |
|----------------------------------------------------|------------------------------|--------------------------|-------------------|------------|----------------------------|
|                                                    |                              | MIC <sub>50</sub>        | MIC <sub>90</sub> | Range      |                            |
|                                                    | Colistin (n=74) <sup>e</sup> | 0.5                      | 1                 | ≤0.12-→4   | 96.0                       |
|                                                    | Tigecycline                  | 0.5                      | 2                 | 0.25-4     | 98.5                       |
|                                                    | Levofloxacin                 | 0.06                     | >4                | ≤0.03-→4   | 82.3                       |
| Ceftazidime non-susceptible (52) <sup>d</sup>      | Ceftazidime-avibactam        | 0.5                      | 2                 | 0.12-2     | 100                        |
|                                                    | Ceftazidime                  | 128                      | >128              | 16-→128    | 0                          |
|                                                    | Cefepime                     | 16                       | >16               | ≤0.12-→16  | 26.9                       |
|                                                    | Aztreonam                    | 64                       | 128               | 8-→128     | 0                          |
|                                                    | Piperacillin-tazobactam      | 64                       | >128              | 4-→128     | 23.1                       |
|                                                    | Doripenem                    | 0.12                     | 0.5               | 0.03-4     | 92.3                       |
|                                                    | Imipenem                     | 0.5                      | 2                 | 0.12-8     | 88.5                       |
|                                                    | Meropenem                    | 0.12                     | 0.5               | 0.015-8    | 92.3                       |
|                                                    | Amikacin                     | 2                        | 8                 | 0.5-32     | 96.2                       |
|                                                    | Colistin (n=28) <sup>e</sup> | 0.5                      | 1                 | 0.25-→4    | 96.4                       |
|                                                    | Tigecycline                  | 1                        | 2                 | 0.25-4     | 96.2                       |
|                                                    | Levofloxacin                 | 0.5                      | >4                | ≤0.03-→4   | 63.5                       |
| Meropenem non-susceptible (6) <sup>d</sup>         | Ceftazidime-avibactam        | — <sup>b</sup>           | —                 | 0.06-1     | 100                        |
|                                                    | Ceftazidime                  | —                        | —                 | 0.12-128   | 33.3                       |
|                                                    | Cefepime                     | —                        | —                 | ≤0.12-→16  | 33.3                       |
|                                                    | Aztreonam                    | —                        | —                 | 0.06-→128  | 33.3                       |
|                                                    | Piperacillin-tazobactam      | —                        | —                 | 1-→128     | 33.3                       |
|                                                    | Doripenem                    | —                        | —                 | 0.12-→4    | 16.7                       |
|                                                    | Imipenem                     | —                        | —                 | 2-→8       | 0                          |
|                                                    | Meropenem                    | —                        | —                 | 2-→8       | 0                          |
|                                                    | Amikacin                     | —                        | —                 | 1-4        | 100                        |
|                                                    | Colistin (n=4) <sup>e</sup>  | —                        | —                 | 1-→4       | 75.0                       |
|                                                    | Tigecycline                  | —                        | —                 | 0.5-2      | 100                        |
|                                                    | Levofloxacin                 | —                        | —                 | 0.06-→4    | 66.7                       |
| Colistin-resistant (3) <sup>d</sup>                | Ceftazidime-avibactam        | — <sup>b</sup>           | —                 | 0.06-0.5   | 100                        |
|                                                    | Ceftazidime                  | —                        | —                 | 0.12-32    | 66.7                       |
|                                                    | Cefepime                     | —                        | —                 | ≤0.12-0.25 | 100                        |
|                                                    | Aztreonam                    | —                        | —                 | 0.12-32    | 66.7                       |
|                                                    | Piperacillin-tazobactam      | —                        | —                 | 2-16       | 100                        |
|                                                    | Doripenem                    | —                        | —                 | 0.03-→4    | 66.7                       |
|                                                    | Imipenem                     | —                        | —                 | 0.5-→8     | 66.7                       |
|                                                    | Meropenem                    | —                        | —                 | 0.03-→8    | 66.7                       |
|                                                    | Amikacin                     | —                        | —                 | 1-2        | 100                        |
|                                                    | Colistin (n=3) <sup>e</sup>  | —                        | —                 | >4-→4      | 0                          |
|                                                    | Tigecycline                  | —                        | —                 | 0.25-1     | 100                        |
|                                                    | Levofloxacin                 | —                        | —                 | 0.06-0.12  | 100                        |
| Multidrug-resistant (22) <sup>d</sup>              | Ceftazidime-avibactam        | 1                        | 2                 | 0.12-2     | 100                        |
|                                                    | Ceftazidime                  | 128                      | >128              | 16-→128    | 0                          |
|                                                    | Cefepime                     | >16                      | >16               | 4-→16      | 0                          |
|                                                    | Aztreonam                    | 128                      | >128              | 32-→128    | 0                          |
|                                                    | Piperacillin-tazobactam      | >128                     | >128              | 8-→128     | 13.6                       |
|                                                    | Doripenem                    | 0.12                     | 2                 | 0.06-2     | 86.4                       |
|                                                    | Imipenem                     | 0.5                      | 8                 | 0.12-8     | 86.4                       |
|                                                    | Meropenem                    | 0.12                     | 4                 | 0.015-8    | 86.4                       |
|                                                    | Amikacin                     | 4                        | 16                | 1-32       | 90.9                       |
|                                                    | Colistin (n=9) <sup>e</sup>  | — <sup>b</sup>           | —                 | 0.25-1     | 100                        |
|                                                    | Tigecycline                  | 2                        | 2                 | 0.5-4      | 90.9                       |
|                                                    | Levofloxacin                 | >4                       | >4                | 0.5-→4     | 18.2                       |
| <i>Citrobacter</i> spp. <sup>g,j</sup>             |                              |                          |                   |            |                            |
| All (53) <sup>d,i</sup>                            | Ceftazidime-avibactam        | 0.12                     | 0.5               | ≤0.015-1   | 100                        |
|                                                    | Ceftazidime                  | 0.5                      | 128               | 0.12-→128  | 81.1                       |
|                                                    | Cefepime                     | ≤0.12                    | 8                 | ≤0.12-→16  | 86.8                       |
|                                                    | Aztreonam                    | 0.12                     | 32                | 0.03-128   | 77.4                       |
|                                                    | Piperacillin-tazobactam      | 4                        | 64                | 1-→128     | 83.0                       |
|                                                    | Doripenem                    | 0.03                     | 0.12              | 0.03-0.5   | 100                        |
|                                                    | Imipenem                     | 0.5                      | 1                 | 0.06-2     | 92.5                       |



| Organism, phenotype (no. of isolates) <sup>a</sup>  | Antimicrobial agent                          | MIC (µg/ml) <sup>b</sup> |                   |            | % Susceptible <sup>c</sup> |      |
|-----------------------------------------------------|----------------------------------------------|--------------------------|-------------------|------------|----------------------------|------|
|                                                     |                                              | MIC <sub>50</sub>        | MIC <sub>90</sub> | Range      |                            |      |
|                                                     | Meropenem                                    | 0.03                     | 0.06              | 0.015–0.25 | 100                        |      |
|                                                     | Amikacin                                     | 2                        | 8                 | 0.5–32     | 98.1                       |      |
|                                                     | Colistin (n=37) <sup>e</sup>                 | 1                        | 1                 | ≤0.12–2    | 100                        |      |
|                                                     | Tigecycline                                  | 0.25                     | 1                 | 0.12–2     | 100                        |      |
|                                                     | Levofloxacin                                 | 0.06                     | 2                 | ≤0.03–>4   | 90.6                       |      |
| Ceftazidime non-susceptible (10) <sup>d</sup>       | Ceftazidime-avibactam                        | 0.5                      | 0.5               | 0.12–0.5   | 100                        |      |
|                                                     | Ceftazidime                                  | 128                      | 128               | 8–>128     | 0                          |      |
|                                                     | Cefepime                                     | 1                        | >16               | ≤0.12–>16  | 70.0                       |      |
|                                                     | Aztreonam                                    | 32                       | 64                | 2–128      | 10.0                       |      |
|                                                     | Piperacillin-tazobactam                      | 64                       | 128               | 2–>128     | 30.0                       |      |
|                                                     | Doripenem                                    | 0.06                     | 0.12              | 0.03–0.12  | 100                        |      |
|                                                     | Imipenem                                     | 0.5                      | 1                 | 0.5–1      | 100                        |      |
|                                                     | Meropenem                                    | 0.06                     | 0.06              | 0.03–0.12  | 100                        |      |
|                                                     | Amikacin                                     | 2                        | 8                 | 1–16       | 100                        |      |
|                                                     | Colistin (n=8) <sup>e</sup>                  | — <sup>b</sup>           | —                 | 0.25–2     | 100                        |      |
|                                                     | Tigecycline                                  | 0.5                      | 2                 | 0.25–2     | 100                        |      |
|                                                     | Levofloxacin                                 | 0.12                     | 2                 | 0.06–>4    | 90.0                       |      |
|                                                     | Multidrug-resistant (2) <sup>d</sup>         | Ceftazidime-avibactam    | — <sup>b</sup>    | —          | 0.5–0.5                    | 100  |
| Ceftazidime                                         |                                              | —                        | —                 | 128–128    | 0                          |      |
| Cefepime                                            |                                              | —                        | —                 | >16–>16    | 0                          |      |
| Aztreonam                                           |                                              | —                        | —                 | 64–128     | 0                          |      |
| Piperacillin-tazobactam                             |                                              | —                        | —                 | 128–>128   | 0                          |      |
| Doripenem                                           |                                              | —                        | —                 | 0.12–0.12  | 100                        |      |
| Imipenem                                            |                                              | —                        | —                 | 0.5–1      | 100                        |      |
| Meropenem                                           |                                              | —                        | —                 | 0.06–0.06  | 100                        |      |
| Amikacin                                            |                                              | —                        | —                 | 8–16       | 100                        |      |
| Colistin (n=1) <sup>e</sup>                         |                                              | —                        | —                 | 1          | 100                        |      |
| Tigecycline                                         |                                              | —                        | —                 | 1–2        | 100                        |      |
| Levofloxacin                                        |                                              | —                        | —                 | 2–>4       | 50.0                       |      |
| Proteaceae <sup>l</sup><br>All (128) <sup>d,k</sup> |                                              | Ceftazidime-avibactam    | 0.03              | 0.12       | ≤0.015–0.5                 | 100  |
|                                                     | Ceftazidime                                  | 0.06                     | 4                 | 0.03–16    | 93.8                       |      |
|                                                     | Cefepime                                     | ≤0.12                    | 2                 | ≤0.12–>16  | 90.6                       |      |
|                                                     | Aztreonam                                    | ≤0.015                   | 0.5               | ≤0.015–16  | 95.3                       |      |
|                                                     | Piperacillin-tazobactam                      | ≤0.25                    | 1                 | ≤0.25–8    | 100                        |      |
|                                                     | Doripenem                                    | 0.25                     | 0.5               | 0.03–4     | 98.4                       |      |
|                                                     | Imipenem                                     | 2                        | 4                 | 0.12–8     | 30.5                       |      |
|                                                     | Meropenem                                    | 0.06                     | 0.25              | 0.03–1     | 100                        |      |
|                                                     | Amikacin                                     | 4                        | 8                 | ≤0.25–>32  | 99.2                       |      |
|                                                     | Colistin (n=81) <sup>e</sup>                 | >4                       | >4                | >4–>4      | 0                          |      |
|                                                     | Tigecycline                                  | 2                        | 4                 | 0.5–8      | 71.1                       |      |
|                                                     | Levofloxacin                                 | 0.06                     | >4                | ≤0.03–>4   | 78.9                       |      |
|                                                     | Ceftazidime-non-susceptible (8) <sup>d</sup> | Ceftazidime-avibactam    | — <sup>b</sup>    | —          | 0.03–0.5                   | 100  |
|                                                     |                                              | Ceftazidime              | —                 | —          | 8–16                       | 0    |
|                                                     |                                              | Cefepime                 | —                 | —          | ≤0.12–>16                  | 62.5 |
| Aztreonam                                           |                                              | —                        | —                 | 0.12–16    | 62.5                       |      |
| Piperacillin-tazobactam                             |                                              | —                        | —                 | ≤0.25–8    | 100                        |      |
| Doripenem                                           |                                              | —                        | —                 | 0.06–1     | 100                        |      |
| Imipenem                                            |                                              | —                        | —                 | 0.25–4     | 25.0                       |      |
| Meropenem                                           |                                              | —                        | —                 | 0.06–0.25  | 100                        |      |
| Amikacin                                            |                                              | —                        | —                 | 1–4        | 100                        |      |
| Colistin (n=4) <sup>e</sup>                         |                                              | —                        | —                 | >4–>4      | 0                          |      |
| Tigecycline                                         | —                                            | —                        | 1–8               | 62.5       |                            |      |
| Levofloxacin                                        | —                                            | —                        | ≤0.03–>4          | 37.5       |                            |      |
| Multidrug-resistant (8) <sup>d</sup>                | Ceftazidime-avibactam                        | — <sup>b</sup>           | —                 | 0.06–0.5   | 100                        |      |
|                                                     | Ceftazidime                                  | —                        | —                 | 0.12–16    | 62.5                       |      |
|                                                     | Cefepime                                     | —                        | —                 | 16–>16     | 0                          |      |
|                                                     | Aztreonam                                    | —                        | —                 | ≤0.015–16  | 37.5                       |      |
|                                                     | Piperacillin-tazobactam                      | —                        | —                 | ≤0.25–8    | 100                        |      |

| Organism, phenotype (no. of isolates) <sup>a</sup> | Antimicrobial agent           | MIC (µg/ml) <sup>b</sup> |                   |            | % Susceptible <sup>c</sup> |
|----------------------------------------------------|-------------------------------|--------------------------|-------------------|------------|----------------------------|
|                                                    |                               | MIC <sub>50</sub>        | MIC <sub>90</sub> | Range      |                            |
|                                                    | Doripenem                     | —                        | —                 | 0.06–4     | 87.5                       |
|                                                    | Imipenem                      | —                        | —                 | 0.25–8     | 37.5                       |
|                                                    | Meropenem                     | —                        | —                 | 0.06–1     | 100                        |
|                                                    | Amikacin                      | —                        | —                 | 1–>32      | 87.5                       |
|                                                    | Colistin (n=6) <sup>e</sup>   | —                        | —                 | >4–>4      | 0                          |
|                                                    | Tigecycline                   | —                        | —                 | 1–8        | 62.5                       |
|                                                    | Levofloxacin                  | —                        | —                 | 0.5–>4     | 12.5                       |
| <hr/>                                              |                               |                          |                   |            |                            |
| <i>Other Enterobacteriaceae</i> <sup>g,i</sup>     |                               |                          |                   |            |                            |
| All (32) <sup>d,l</sup>                            | Ceftazidime-avibactam         | 0.12                     | 0.25              | ≤0.015–0.5 | 100                        |
|                                                    | Ceftazidime                   | 0.25                     | 2                 | 0.12–32    | 90.6                       |
|                                                    | Cefepime                      | ≤0.12                    | 1                 | ≤0.12–>16  | 90.6                       |
|                                                    | Aztreonam                     | 0.12                     | 64                | 0.03–64    | 84.4                       |
|                                                    | Piperacillin-tazobactam       | 2                        | 8                 | 0.5–128    | 93.8                       |
|                                                    | Doripenem                     | 0.12                     | 0.25              | 0.03–0.5   | 100                        |
|                                                    | Imipenem                      | 1                        | 2                 | 0.25–2     | 84.4                       |
|                                                    | Meropenem                     | 0.06                     | 0.06              | 0.03–0.12  | 100                        |
|                                                    | Amikacin                      | 2                        | 8                 | 1–>32      | 93.8                       |
|                                                    | Colistin (n=18) <sup>e</sup>  | >4                       | >4                | 1–>4       | 11.1                       |
|                                                    | Tigecycline                   | 1                        | 2                 | 0.25–4     | 90.6                       |
|                                                    | Levofloxacin                  | 0.12                     | 2                 | ≤0.03–>4   | 90.6                       |
| Ceftazidime-non-susceptible (3) <sup>d</sup>       | Ceftazidime-avibactam         | — <sup>b</sup>           | —                 | 0.25–0.25  | 100                        |
|                                                    | Ceftazidime                   | —                        | —                 | 16–32      | 0                          |
|                                                    | Cefepime                      | —                        | —                 | 0.25–>16   | 66.7                       |
|                                                    | Aztreonam                     | —                        | —                 | 16–64      | 0                          |
|                                                    | Piperacillin-tazobactam       | —                        | —                 | 8–128      | 33.3                       |
|                                                    | Doripenem                     | —                        | —                 | 0.12–0.12  | 100                        |
|                                                    | Imipenem                      | —                        | —                 | 1–2        | 66.7                       |
|                                                    | Meropenem                     | —                        | —                 | 0.06–0.12  | 100                        |
|                                                    | Amikacin                      | —                        | —                 | 8–>32      | 66.7                       |
|                                                    | Colistin (n=2) <sup>e</sup>   | —                        | —                 | >4–>4      | 0                          |
|                                                    | Tigecycline                   | —                        | —                 | 1–2        | 100                        |
|                                                    | Levofloxacin                  | —                        | —                 | 0.12–2     | 100                        |
| Multidrug-resistant (3) <sup>d</sup>               | Ceftazidime-avibactam         | — <sup>b</sup>           | —                 | 0.25–0.25  | 100                        |
|                                                    | Ceftazidime                   | —                        | —                 | 2–32       | 33.3                       |
|                                                    | Cefepime                      | —                        | —                 | 0.25–>16   | 33.3                       |
|                                                    | Aztreonam                     | —                        | —                 | 64–64      | 0                          |
|                                                    | Piperacillin-tazobactam       | —                        | —                 | 4–128      | 66.7                       |
|                                                    | Doripenem                     | —                        | —                 | 0.12–0.12  | 100                        |
|                                                    | Imipenem                      | —                        | —                 | 1–2        | 66.7                       |
|                                                    | Meropenem                     | —                        | —                 | 0.06–0.12  | 100                        |
|                                                    | Amikacin                      | —                        | —                 | 8–>32      | 33.3                       |
|                                                    | Colistin (n=3) <sup>e</sup>   | —                        | —                 | >4–>4      | 0                          |
|                                                    | Tigecycline                   | —                        | —                 | 1–2        | 100                        |
|                                                    | Levofloxacin                  | —                        | —                 | 2–>4       | 66.7                       |
| <hr/>                                              |                               |                          |                   |            |                            |
| <i>Pseudomonas aeruginosa</i> <sup>g</sup>         |                               |                          |                   |            |                            |
| All (276)                                          | Ceftazidime-avibactam         | 2                        | 8                 | 0.25–>128  | 92.0                       |
|                                                    | Ceftazidime                   | 4                        | 64                | 0.5–>128   | 69.9                       |
|                                                    | Cefepime                      | 4                        | >16               | 0.25–>16   | 73.9                       |
|                                                    | Aztreonam                     | 16                       | 64                | 0.25–>128  | 49.3                       |
|                                                    | Piperacillin-tazobactam       | 16                       | >128              | ≤0.25–>128 | 54.7                       |
|                                                    | Doripenem                     | 1                        | >4                | 0.03–>4    | 68.5                       |
|                                                    | Imipenem                      | 2                        | >8                | 0.25–>8    | 57.6                       |
|                                                    | Meropenem                     | 1                        | >8                | 0.03–>8    | 66.7                       |
|                                                    | Amikacin                      | 4                        | >32               | 0.5–>32    | 84.1                       |
|                                                    | Colistin (n=185) <sup>e</sup> | 2                        | 2                 | 0.25–4     | 94.1                       |
|                                                    | Levofloxacin                  | 1                        | >4                | ≤0.03–>4   | 65.2                       |
| All, MBL-negative (271)                            | Ceftazidime-avibactam         | 2                        | 8                 | 0.25–32    | 93.7                       |
|                                                    | Ceftazidime                   | 4                        | 64                | 0.5–>128   | 71.2                       |
|                                                    | Cefepime                      | 4                        | >16               | 0.25–>16   | 75.3                       |

| Organism, phenotype (no. of isolates) <sup>a</sup> | Antimicrobial agent           | MIC (µg/ml) <sup>b</sup> |                   |            | % Susceptible <sup>c</sup> |
|----------------------------------------------------|-------------------------------|--------------------------|-------------------|------------|----------------------------|
|                                                    |                               | MIC <sub>50</sub>        | MIC <sub>90</sub> | Range      |                            |
|                                                    | Aztreonam                     | 16                       | 64                | 0.25->128  | 49.8                       |
|                                                    | Piperacillin-tazobactam       | 16                       | >128              | ≤0.25->128 | 55.7                       |
|                                                    | Doripenem                     | 1                        | >4                | 0.03->4    | 69.7                       |
|                                                    | Imipenem                      | 2                        | >8                | 0.25->8    | 58.7                       |
|                                                    | Meropenem                     | 1                        | >8                | 0.03->8    | 67.9                       |
|                                                    | Amikacin                      | 4                        | >32               | 0.5->32    | 85.2                       |
|                                                    | Colistin (n=180) <sup>e</sup> | 2                        | 2                 | 0.25-4     | 93.9                       |
|                                                    | Levofloxacin                  | 1                        | >4                | ≤0.03->4   | 66.1                       |
| Ceftazidime-non-susceptible (83)                   | Ceftazidime-avibactam         | 8                        | 16                | 0.25->128  | 73.5                       |
|                                                    | Ceftazidime                   | 32                       | >128              | 16->128    | 0                          |
|                                                    | Cefepime                      | 16                       | >16               | 1->16      | 32.5                       |
|                                                    | Aztreonam                     | 32                       | 128               | 4->128     | 13.3                       |
|                                                    | Piperacillin-tazobactam       | 128                      | >128              | 4->128     | 3.6                        |
|                                                    | Doripenem                     | >4                       | >4                | 0.03->4    | 38.6                       |
|                                                    | Imipenem                      | >8                       | >8                | 1->8       | 25.3                       |
|                                                    | Meropenem                     | >8                       | >8                | 0.12->8    | 38.6                       |
|                                                    | Amikacin                      | 8                        | >32               | 0.5->32    | 72.3                       |
|                                                    | Colistin (n=53) <sup>e</sup>  | 2                        | 2                 | 0.5-4      | 96.2                       |
|                                                    | Levofloxacin                  | >4                       | >4                | 0.25->4    | 39.8                       |
| Ceftazidime-non-susceptible, MBL-negative (78)     | Ceftazidime-avibactam         | 8                        | 16                | 0.25-32    | 78.2                       |
|                                                    | Ceftazidime                   | 32                       | 128               | 16->128    | 0                          |
|                                                    | Cefepime                      | 16                       | >16               | 1->16      | 34.6                       |
|                                                    | Aztreonam                     | 32                       | 128               | 4->128     | 12.8                       |
|                                                    | Piperacillin-tazobactam       | 128                      | >128              | 4->128     | 3.9                        |
|                                                    | Doripenem                     | >4                       | >4                | 0.03->4    | 41.0                       |
|                                                    | Imipenem                      | >8                       | >8                | 1->8       | 26.9                       |
|                                                    | Meropenem                     | >8                       | >8                | 0.12->8    | 41.0                       |
|                                                    | Amikacin                      | 4                        | >32               | 0.5->32    | 75.6                       |
|                                                    | Colistin (n=48) <sup>e</sup>  | 2                        | 2                 | 0.5-4      | 95.8                       |
|                                                    | Levofloxacin                  | >4                       | >4                | 0.25->4    | 41.0                       |
| Meropenem non-susceptible (92)                     | Ceftazidime-avibactam         | 8                        | 16                | 1->128     | 78.3                       |
|                                                    | Ceftazidime                   | 16                       | 128               | 1->128     | 44.6                       |
|                                                    | Cefepime                      | 16                       | >16               | 2->16      | 39.1                       |
|                                                    | Aztreonam                     | 32                       | 128               | 2->128     | 12.0                       |
|                                                    | Piperacillin-tazobactam       | 64                       | >128              | 4->128     | 18.5                       |
|                                                    | Doripenem                     | >4                       | >4                | 1->4       | 5.4                        |
|                                                    | Imipenem                      | >8                       | >8                | 1->8       | 3.3                        |
|                                                    | Meropenem                     | >8                       | >8                | 4->8       | 0                          |
|                                                    | Amikacin                      | 8                        | >32               | 0.5->32    | 60.9                       |
|                                                    | Colistin (n=63) <sup>e</sup>  | 2                        | 2                 | 0.25-4     | 95.2                       |
|                                                    | Levofloxacin                  | >4                       | >4                | 0.25->4    | 28.3                       |
| Meropenem non-susceptible, MBL-negative (87)       | Ceftazidime-avibactam         | 8                        | 16                | 1-32       | 82.8                       |
|                                                    | Ceftazidime                   | 16                       | 64                | 1->128     | 47.1                       |
|                                                    | Cefepime                      | 16                       | >16               | 2->16      | 41.4                       |
|                                                    | Aztreonam                     | 32                       | 128               | 2->128     | 11.5                       |
|                                                    | Piperacillin-tazobactam       | 64                       | >128              | 4->128     | 19.5                       |
|                                                    | Doripenem                     | >4                       | >4                | 1->4       | 5.8                        |
|                                                    | Imipenem                      | >8                       | >8                | 1->8       | 3.5                        |
|                                                    | Meropenem                     | >8                       | >8                | 4->8       | 0                          |
|                                                    | Amikacin                      | 8                        | >32               | 0.5->32    | 63.2                       |
|                                                    | Colistin (n=58) <sup>e</sup>  | 2                        | 2                 | 0.25-4     | 94.8                       |
|                                                    | Levofloxacin                  | >4                       | >4                | 0.25->4    | 28.7                       |
| Multidrug-resistant (76)                           | Ceftazidime-avibactam         | 8                        | 32                | 0.5->128   | 72.4                       |
|                                                    | Ceftazidime                   | 32                       | 128               | 2->128     | 30.3                       |
|                                                    | Cefepime                      | >16                      | >16               | 2->16      | 17.1                       |
|                                                    | Aztreonam                     | 32                       | 128               | 8->128     | 5.3                        |
|                                                    | Piperacillin-tazobactam       | >128                     | >128              | 4->128     | 6.6                        |
|                                                    | Doripenem                     | >4                       | >4                | 0.12->4    | 17.1                       |
|                                                    | Imipenem                      | >8                       | >8                | 1->8       | 11.8                       |

| Organism, phenotype (no. of isolates) <sup>a</sup> | Antimicrobial agent          | MIC (µg/ml) <sup>b</sup> |                   |         | % Susceptible <sup>c</sup> |
|----------------------------------------------------|------------------------------|--------------------------|-------------------|---------|----------------------------|
|                                                    |                              | MIC <sub>50</sub>        | MIC <sub>90</sub> | Range   |                            |
|                                                    | Meropenem                    | >8                       | >8                | 0.12->8 | 14.5                       |
|                                                    | Amikacin                     | 32                       | >32               | 0.5->32 | 47.4                       |
|                                                    | Colistin (n=52) <sup>e</sup> | 2                        | 2                 | 0.25-4  | 94.2                       |
|                                                    | Levofloxacin                 | >4                       | >4                | 0.5->4  | 13.2                       |
| Multidrug-resistant, MBL-negative (71)             | Ceftazidime-avibactam        | 8                        | 16                | 0.5-32  | 77.5                       |
|                                                    | Ceftazidime                  | 32                       | 128               | 2->128  | 32.4                       |
|                                                    | Cefepime                     | >16                      | >16               | 2->16   | 18.3                       |
|                                                    | Aztreonam                    | 64                       | 128               | 8->128  | 4.2                        |
|                                                    | Piperacillin-tazobactam      | >128                     | >128              | 4->128  | 7.0                        |
|                                                    | Doripenem                    | >4                       | >4                | 0.12->4 | 18.3                       |
|                                                    | Imipenem                     | >8                       | >8                | 1->8    | 12.7                       |
|                                                    | Meropenem                    | >8                       | >8                | 0.12->8 | 15.5                       |
|                                                    | Amikacin                     | 32                       | >32               | 0.5->32 | 49.3                       |
|                                                    | Colistin (n=47) <sup>e</sup> | 2                        | 2                 | 0.25-4  | 93.6                       |
|                                                    | Levofloxacin                 | >4                       | >4                | 0.5->4  | 12.7                       |

209 <sup>a</sup> MBL-negative, no gene encoding a metallo-β-lactamase was detected by polymerase chain reaction assay.

210 <sup>b</sup> —, MIC<sub>50</sub> and MIC<sub>90</sub> were not calculated for n <10 isolates.

211 <sup>c</sup> % Susceptibility was determined according to CLSI 2016 breakpoints with the exception of ceftazidime-avibactam  
212 and tigecycline where US FDA breakpoints were applied and colistin where EUCAST breakpoints were applied.

213 <sup>d</sup> All isolates were MBL-negative.

214 <sup>e</sup> Values are for colistin tested without 0.002% polysorbate-80; isolates collected in 2014-2015 only.

215 <sup>f</sup> Excluded isolates of Proteeae and *Serratia* spp., which are intrinsically resistant to colistin.

216 <sup>g</sup> No colistin-resistant isolates were collected.

217 <sup>h</sup> *Enterobacter* spp. included *Enterobacter aerogenes* (n=46), *Enterobacter asburiae* (n=11), *Enterobacter cloacae*  
218 (n=69), and *Enterobacter kobei* (n=4).

219 <sup>i</sup> *Citrobacter* spp. included *Citrobacter amalonaticus* (n=2), *Citrobacter braakii* (n=1), *Citrobacter freundii* (n=36),  
220 and *Citrobacter koseri* (n=14).

221 <sup>j</sup> No meropenem non-susceptible isolates were collected.

222 <sup>k</sup> Proteeae included *Morganella morganii* (n=26), *Proteus mirabilis* (n=76), *Proteus penneri* (n=1), *Proteus vulgaris*  
223 (n=16), *Providencia rettgeri* (n=5), and *Providencia stuartii* (n=4).

224 <sup>l</sup> Other *Enterobacteriaceae* included *Raoultella ornithinolytica* (n=2) and *Serratia marcescens* (n=30).

225 **Table S3B.** Brazil - *In vitro* activities of ceftazidime-avibactam and comparator antimicrobial  
 226 agents tested against 457 isolates of  $\beta$ -lactamase-positive *Enterobacteriaceae* (n=352) and *P.*  
 227 *aeruginosa* (n=105) collected as part of the INFORM global surveillance program in 2012–2015.  
 228

| Organism/Genotype (no. of isolates) <sup>a</sup> | Antimicrobial agent                             | MIC ( $\mu\text{g/ml}$ ) <sup>b</sup> |                   |                    | % Susceptible <sup>c</sup> |
|--------------------------------------------------|-------------------------------------------------|---------------------------------------|-------------------|--------------------|----------------------------|
|                                                  |                                                 | MIC <sub>50</sub>                     | MIC <sub>90</sub> | Range              |                            |
| <i>Enterobacteriaceae</i> (352)                  |                                                 |                                       |                   |                    |                            |
| OSBL-positive (5)                                | Ceftazidime-avibactam                           | — <sup>b</sup>                        | —                 | 0.06–0.5           | 100                        |
|                                                  | Ceftazidime                                     | —                                     | —                 | 0.06–2             | 100                        |
|                                                  | Cefepime                                        | —                                     | —                 | $\leq 0.12$ –>16   | 40.0                       |
|                                                  | Aztreonam                                       | —                                     | —                 | $\leq 0.015$ –4    | 100                        |
|                                                  | Piperacillin-tazobactam                         | —                                     | —                 | 0.5–>128           | 80.0                       |
|                                                  | Doripenem                                       | —                                     | —                 | 0.06–2             | 80.0                       |
|                                                  | Imipenem                                        | —                                     | —                 | 0.12–8             | 60.0                       |
|                                                  | Meropenem                                       | —                                     | —                 | 0.03–2             | 80.0                       |
|                                                  | Amikacin                                        | —                                     | —                 | 2–32               | 80.0                       |
|                                                  | Colistin (n=0) <sup>d</sup>                     | —                                     | —                 | ND <sup>d</sup>    | ND                         |
|                                                  | Tigecycline                                     | —                                     | —                 | 1–4                | 80.0                       |
|                                                  | Levofloxacin                                    | —                                     | —                 | 0.06–>4            | 40.0                       |
|                                                  | ESBL-positive (211) <sup>e</sup>                |                                       |                   |                    |                            |
|                                                  | Ceftazidime-avibactam                           | 0.25                                  | 1                 | $\leq 0.015$ –>128 | 99.5                       |
|                                                  | Ceftazidime                                     | 32                                    | >128              | 0.5–>128           | 34.6                       |
|                                                  | Cefepime                                        | >16                                   | >16               | $\leq 0.12$ –>16   | 6.2                        |
|                                                  | Aztreonam                                       | 64                                    | >128              | 2–>128             | 14.7                       |
|                                                  | Piperacillin-tazobactam                         | 16                                    | >128              | 0.5–>128           | 59.7                       |
|                                                  | Doripenem                                       | 0.06                                  | 1                 | 0.015–>4           | 92.4                       |
|                                                  | Imipenem                                        | 0.25                                  | 0.5               | 0.06–>8            | 95.7                       |
|                                                  | Meropenem                                       | 0.06                                  | 1                 | 0.015–>8           | 91.0                       |
|                                                  | Amikacin                                        | 4                                     | 16                | 0.5–>32            | 96.7                       |
|                                                  | Colistin (n=113) <sup>d</sup>                   | 1                                     | 1                 | $\leq 0.12$ –>4    | 96.5                       |
|                                                  | Tigecycline                                     | 0.5                                   | 1                 | $\leq 0.015$ –8    | 97.2                       |
|                                                  | Levofloxacin                                    | >4                                    | >4                | $\leq 0.03$ –>4    | 22.7                       |
|                                                  | AmpC-positive (34) <sup>f</sup>                 |                                       |                   |                    |                            |
|                                                  | Ceftazidime-avibactam                           | 0.25                                  | 2                 | 0.06–2             | 100                        |
|                                                  | Ceftazidime                                     | 0.5                                   | >128              | 0.12–>128          | 52.9                       |
|                                                  | Cefepime                                        | 0.25                                  | 4                 | $\leq 0.12$ –16    | 76.5                       |
|                                                  | Aztreonam                                       | 0.25                                  | 128               | 0.03–128           | 58.8                       |
|                                                  | Piperacillin-tazobactam                         | 4                                     | >128              | 1–>128             | 70.6                       |
|                                                  | Doripenem                                       | 0.12                                  | 0.25              | 0.03–>4            | 91.2                       |
|                                                  | Imipenem                                        | 2                                     | 4                 | 0.25–>8            | 32.4                       |
|                                                  | Meropenem                                       | 0.06                                  | 2                 | 0.03–>8            | 88.2                       |
|                                                  | Amikacin                                        | 2                                     | 4                 | 0.5–8              | 100                        |
|                                                  | Colistin (n=16) <sup>d</sup>                    | 1                                     | >4                | 0.25–>4            | 87.5                       |
|                                                  | Tigecycline                                     | 0.5                                   | 2                 | 0.25–4             | 94.1                       |
|                                                  | Levofloxacin                                    | 0.12                                  | >4                | $\leq 0.03$ –>4    | 73.5                       |
|                                                  | ESBL-positive + AmpC-positive (11) <sup>g</sup> |                                       |                   |                    |                            |
|                                                  | Ceftazidime-avibactam                           | 1                                     | 2                 | 0.25–2             | 100                        |
|                                                  | Ceftazidime                                     | >128                                  | >128              | 32–>128            | 0                          |
|                                                  | Cefepime                                        | >16                                   | >16               | 16–>16             | 0                          |
|                                                  | Aztreonam                                       | 128                                   | >128              | 64–>128            | 0                          |
|                                                  | Piperacillin-tazobactam                         | >128                                  | >128              | 32–>128            | 0                          |
|                                                  | Doripenem                                       | 0.12                                  | 0.25              | 0.06–0.5           | 100                        |
|                                                  | Imipenem                                        | 0.5                                   | 1                 | 0.25–1             | 100                        |
|                                                  | Meropenem                                       | 0.12                                  | 0.25              | 0.06–0.5           | 100                        |
|                                                  | Amikacin                                        | 4                                     | 8                 | 1–32               | 90.9                       |
|                                                  | Colistin (n=2) <sup>d</sup>                     | — <sup>b</sup>                        | —                 | 0.25–1             | 100                        |
|                                                  | Tigecycline                                     | 1                                     | 2                 | 0.5–4              | 90.9                       |
|                                                  | Levofloxacin                                    | >4                                    | >4                | 0.5–>4             | 9.1                        |
|                                                  | KPC-positive (89) <sup>h</sup>                  |                                       |                   |                    |                            |
|                                                  | Ceftazidime-avibactam                           | 1                                     | 2                 | 0.25–4             | 100                        |
|                                                  | Ceftazidime                                     | 32                                    | >128              | 8–>128             | 0                          |

| Organism/Genotype (no. of isolates) <sup>a</sup>               | Antimicrobial agent          | MIC ( $\mu\text{g/ml}$ ) <sup>b</sup> |                   |                 | % Susceptible <sup>c</sup> |
|----------------------------------------------------------------|------------------------------|---------------------------------------|-------------------|-----------------|----------------------------|
|                                                                |                              | MIC <sub>50</sub>                     | MIC <sub>90</sub> | Range           |                            |
|                                                                | Cefepime                     | >16                                   | >16               | 2->16           | 2.2                        |
|                                                                | Aztreonam                    | >128                                  | >128              | 32->128         | 0                          |
|                                                                | Piperacillin-tazobactam      | >128                                  | >128              | 8->128          | 1.1                        |
|                                                                | Doripenem                    | >4                                    | >4                | 1->4            | 3.4                        |
|                                                                | Imipenem                     | >8                                    | >8                | 2->8            | 0                          |
|                                                                | Meropenem                    | >8                                    | >8                | 2-8             | 0                          |
|                                                                | Amikacin                     | 4                                     | >32               | 0.5->32         | 77.5                       |
|                                                                | Colistin (n=62) <sup>d</sup> | 1                                     | >4                | 0.25->4         | 72.6                       |
|                                                                | Tigecycline                  | 1                                     | 4                 | 0.25-8          | 89.9                       |
|                                                                | Levofloxacin                 | >4                                    | >4                | 0.03->4         | 5.6                        |
| OXA-48-like-positive (2) <sup>i</sup>                          | Ceftazidime-avibactam        | — <sup>b</sup>                        | —                 | 0.5-1           | 0                          |
|                                                                | Ceftazidime                  | —                                     | —                 | 64-128          | 0                          |
|                                                                | Cefepime                     | —                                     | —                 | 16-16           | 0                          |
|                                                                | Aztreonam                    | —                                     | —                 | 64-128          | 0                          |
|                                                                | Piperacillin-tazobactam      | —                                     | —                 | 128->128        | 0                          |
|                                                                | Doripenem                    | —                                     | —                 | 0.06-0.25       | 100                        |
|                                                                | Imipenem                     | —                                     | —                 | 0.12-1          | 100                        |
|                                                                | Meropenem                    | —                                     | —                 | 0.03-0.12       | 100                        |
|                                                                | Amikacin                     | —                                     | —                 | 2-4             | 100                        |
|                                                                | Colistin (n=0) <sup>d</sup>  | —                                     | —                 | ND <sup>d</sup> | ND                         |
|                                                                | Tigecycline                  | —                                     | —                 | 0.5-2           | 100                        |
|                                                                | Levofloxacin                 | —                                     | —                 | 4->4            | 0                          |
| <i>P. aeruginosa</i> (105)<br>ESBL-positive (1) <sup>j,k</sup> | Ceftazidime-avibactam        | — <sup>b</sup>                        | —                 | 8               | 100                        |
|                                                                | Ceftazidime                  | —                                     | —                 | >128            | 0                          |
|                                                                | Cefepime                     | —                                     | —                 | >16             | 0                          |
|                                                                | Aztreonam                    | —                                     | —                 | >32             | 0                          |
|                                                                | Piperacillin-tazobactam      | —                                     | —                 | >128            | 0                          |
|                                                                | Doripenem                    | —                                     | —                 | >4              | 0                          |
|                                                                | Imipenem                     | —                                     | —                 | >8              | 0                          |
|                                                                | Meropenem                    | —                                     | —                 | >8              | 0                          |
|                                                                | Amikacin                     | —                                     | —                 | >32             | 0                          |
|                                                                | Colistin (n=1) <sup>d</sup>  | —                                     | —                 | 1               | 100                        |
|                                                                | Levofloxacin                 | —                                     | —                 | >4              | 0                          |
| MBL-positive (5) <sup>j,l</sup>                                | Ceftazidime-avibactam        | — <sup>b</sup>                        | —                 | 32->128         | 0                          |
|                                                                | Ceftazidime                  | —                                     | —                 | 32->128         | 0                          |
|                                                                | Cefepime                     | —                                     | —                 | 16->16          | 0                          |
|                                                                | Aztreonam                    | —                                     | —                 | 8-64            | 20.0                       |
|                                                                | Piperacillin-tazobactam      | —                                     | —                 | 32->128         | 0                          |
|                                                                | Doripenem                    | —                                     | —                 | >4->4           | 0                          |
|                                                                | Imipenem                     | —                                     | —                 | 4->8            | 0                          |
|                                                                | Meropenem                    | —                                     | —                 | >8->8           | 0                          |
|                                                                | Amikacin                     | —                                     | —                 | 8->32           | 20.0                       |
|                                                                | Colistin (n=5) <sup>d</sup>  | —                                     | —                 | 1-2             | 100                        |
|                                                                | Levofloxacin                 | —                                     | —                 | 1->4            | 20.0                       |
| No acquired $\beta$ -lactamase detected<br>(99) <sup>j</sup>   | Ceftazidime-avibactam        | 8                                     | 16                | 1-32            | 83.8                       |
|                                                                | Ceftazidime                  | 16                                    | 64                | 1->128          | 47.5                       |
|                                                                | Cefepime                     | 16                                    | >16               | 1->16           | 43.3                       |
|                                                                | Aztreonam                    | 32                                    | 64                | 0.5->128        | 17.2                       |
|                                                                | Piperacillin-tazobactam      | 64                                    | >128              | 1->128          | 23.2                       |
|                                                                | Doripenem                    | >4                                    | >4                | 0.12->4         | 18.2                       |
|                                                                | Imipenem                     | >8                                    | >8                | 1->8            | 3.0                        |
|                                                                | Meropenem                    | >8                                    | >8                | 0.12->8         | 13.1                       |
|                                                                | Amikacin                     | 8                                     | >32               | 0.5->32         | 65.7                       |
|                                                                | Colistin (n=64) <sup>d</sup> | 2                                     | 2                 | 0.25-4          | 93.8                       |
|                                                                | Levofloxacin                 | >4                                    | >4                | 0.25->4         | 33.3                       |

229 <sup>a</sup> OSBL, original-spectrum  $\beta$ -lactamase (e.g. TEM-1, SHV-1, SHV-11); ESBL, extended-spectrum  $\beta$ -lactamase;  
230 MBL, metallo- $\beta$ -lactamase.

231 <sup>b</sup> —, MIC<sub>50</sub> and MIC<sub>90</sub> were not calculated for n < 10 isolates.

232 <sup>c</sup> % Susceptibility was determined according to CLSI 2016 breakpoints with the exception of ceftazidime-avibactam  
233 and tigecycline where US FDA breakpoints were applied and colistin where EUCAST breakpoints were applied.

234 <sup>d</sup> Values are for colistin tested without 0.002% polysorbate-80; isolates collected in 2014-2015 only. ND, not  
235 determined; MIC range and % susceptible were not determined for n=0 isolates.

236 <sup>e</sup> Included isolates carrying CTX-M-2; CTX-M-3; CTX-M-8; CTX-M-9; CTX-M-14; CTX-M-15; CTX-M-24;  
237 CTX-M-59; CTX-M-2 and CTX-M-28; CTX-M-15 and CTX-M-2; CTX-M-15 and CTX-M-8; CTX-M-15 and  
238 SHV-136; CTX-M-15 and TEM-15; CTX-M-15 and CTX-M-2 and SHV-12; SHV-12; and the chromosomal ESBL  
239 common to *K. oxytoca*, with or without a SHV-OSBL and/or TEM-OSBL.

240 <sup>f</sup> Included isolates carrying CMY-2 and/or the chromosomal AmpCs common to *Citrobacter* spp., *Enterobacter*  
241 spp., and *Serratia* spp. with or without a TEM-OSBL.

242 <sup>g</sup> Included isolates carrying CTX-M-15 and CMY-2; CTX-M-15 and DHA-1; and the chromosomal AmpCs  
243 common to *Citrobacter* spp. and *Enterobacter* spp. with CTX-M-2, CTX-M-15, or CTX-M-9 and SHV-12; with or  
244 without a SHV-OSBL or TEM-OSBL.

245 <sup>h</sup> Included isolates carrying KPC-2; KPC-3; KPC-2 and CTX-M-2; KPC-2 and CTX-M-8; KPC-2 and CTX-M-9;  
246 KPC-2 and CTX-M-14; KPC-2 and CTX-M-15; KPC-2 and CTX-M-67; KPC-2 and SHV-12; KPC-2 and SHV-52;  
247 KPC-2 and CTX-M-2 and CTX-M-15; KPC-2 and CTX-M-14 and OXA-370; with and without a SHV-OSBL  
248 and/or TEM-OSBL and the chromosomal  $\beta$ -lactamases common to *Enterobacter* spp. and *K. oxytoca*.

249 <sup>i</sup> Isolates carrying OXA-48, CTX-M-15 and a TEM-OSBL; and OXA-370, CTX-M-15; a SHV-OSBL and a TEM-  
250 OSBL.

251 <sup>j</sup> Assumed to carry the chromosomal AmpC common to *P. aeruginosa*.

252 <sup>k</sup> Isolate carrying PER-1.

253 <sup>l</sup> Isolates carrying IMP-49, VIM-2, or SPM-1.

254 **Table S4A.** Chile - *In vitro* activities of ceftazidime-avibactam and comparator antimicrobial  
 255 agents tested against 1,518 isolates of *Enterobacteriaceae* and *P. aeruginosa* collected as part of  
 256 the INFORM global surveillance program in 2012-2015.  
 257

| Organism, phenotype (no. of isolates) <sup>a</sup> | Antimicrobial agent           | MIC (µg/ml) <sup>b</sup> |                   |             | % Susceptible <sup>c</sup> |
|----------------------------------------------------|-------------------------------|--------------------------|-------------------|-------------|----------------------------|
|                                                    |                               | MIC <sub>50</sub>        | MIC <sub>90</sub> | Range       |                            |
| <i>Enterobacteriaceae</i>                          |                               |                          |                   |             |                            |
| All (1,236) <sup>d</sup>                           | Ceftazidime-avibactam         | 0.12                     | 1                 | ≤0.015–8    | 100                        |
|                                                    | Ceftazidime                   | 0.25                     | 128               | ≤0.015–>128 | 66.6                       |
|                                                    | Cefepime                      | ≤0.12                    | >16               | ≤0.12–>16   | 65.2                       |
|                                                    | Aztreonam                     | 0.12                     | >128              | ≤0.015–>128 | 62.4                       |
|                                                    | Piperacillin-tazobactam       | 2                        | >128              | ≤0.25–>128  | 78.0                       |
|                                                    | Doripenem                     | 0.06                     | 0.5               | ≤0.008–>4   | 96.4                       |
|                                                    | Imipenem                      | 0.25                     | 2                 | ≤0.03–8     | 86.1                       |
|                                                    | Meropenem                     | 0.06                     | 0.25              | ≤0.004–8    | 94.0                       |
|                                                    | Amikacin                      | 2                        | 16                | ≤0.25–>32   | 92.1                       |
|                                                    | Colistin (n=685) <sup>e</sup> | 1                        | >4                | ≤0.12–>4    | 80.2                       |
|                                                    | Tigecycline                   | 0.5                      | 2                 | ≤0.015–>8   | 92.7                       |
|                                                    | Levofloxacin                  | 0.25                     | >4                | ≤0.03–>4    | 64.4                       |
| Ceftazidime non-susceptible (413) <sup>d</sup>     | Ceftazidime-avibactam         | 0.5                      | 2                 | ≤0.015–8    | 100                        |
|                                                    | Ceftazidime                   | 64                       | >128              | 8–>128      | 0                          |
|                                                    | Cefepime                      | >16                      | >16               | ≤0.12–>16   | 17.7                       |
|                                                    | Aztreonam                     | 128                      | >128              | 0.06–>128   | 4.1                        |
|                                                    | Piperacillin-tazobactam       | 32                       | >128              | ≤0.25–>128  | 41.9                       |
|                                                    | Doripenem                     | 0.12                     | 2                 | ≤0.008–>4   | 89.8                       |
|                                                    | Imipenem                      | 0.25                     | 1                 | 0.06–8      | 92.5                       |
|                                                    | Meropenem                     | 0.06                     | 2                 | 0.015–8     | 82.6                       |
|                                                    | Amikacin                      | 4                        | >32               | 0.5–>32     | 84.3                       |
|                                                    | Colistin (n=238) <sup>e</sup> | 1                        | >4                | 0.25–>4     | 84.9                       |
|                                                    | Tigecycline                   | 0.5                      | 2                 | 0.06–8      | 95.6                       |
|                                                    | Levofloxacin                  | >4                       | >4                | ≤0.03–>4    | 33.7                       |
| Meropenem non-susceptible (74) <sup>d</sup>        | Ceftazidime-avibactam         | 2                        | 4                 | 0.5–8       | 100                        |
|                                                    | Ceftazidime                   | 128                      | >128              | 0.5–>128    | 2.7                        |
|                                                    | Cefepime                      | >16                      | >16               | 1–>16       | 1.4                        |
|                                                    | Aztreonam                     | >128                     | >128              | 2–>128      | 2.7                        |
|                                                    | Piperacillin-tazobactam       | >128                     | >128              | 128–>128    | 0                          |
|                                                    | Doripenem                     | 2                        | 4                 | 0.5–>4      | 43.2                       |
|                                                    | Imipenem                      | 0.5                      | 1                 | 0.25–8      | 90.5                       |
|                                                    | Meropenem                     | 2                        | 4                 | 2–8         | 0                          |
|                                                    | Amikacin                      | 8                        | >32               | 1–>32       | 63.5                       |
|                                                    | Colistin (n=47) <sup>e</sup>  | 1                        | >4                | 0.25–>4     | 63.8                       |
|                                                    | Tigecycline                   | 1                        | 2                 | 0.06–4      | 96.0                       |
|                                                    | Levofloxacin                  | >4                       | >4                | 0.12–>4     | 1.4                        |
| Colistin-resistant (28) <sup>d,f</sup>             | Ceftazidime-avibactam         | 2                        | 4                 | 0.06–4      | 100                        |
|                                                    | Ceftazidime                   | 64                       | 128               | 0.12–>128   | 35.7                       |
|                                                    | Cefepime                      | >16                      | >16               | ≤0.12–>16   | 32.1                       |
|                                                    | Aztreonam                     | 128                      | >128              | 0.06–>128   | 35.7                       |
|                                                    | Piperacillin-tazobactam       | >128                     | >128              | 2–>128      | 35.7                       |
|                                                    | Doripenem                     | 1                        | 4                 | 0.06–4      | 53.6                       |
|                                                    | Imipenem                      | 0.5                      | 1                 | 0.12–1      | 100                        |
|                                                    | Meropenem                     | 2                        | 4                 | 0.03–8      | 39.3                       |
|                                                    | Amikacin                      | >32                      | >32               | 1–>32       | 32.1                       |
|                                                    | Colistin (n=28) <sup>e</sup>  | >4                       | >4                | 4–>4        | 0                          |
|                                                    | Tigecycline                   | 1                        | 2                 | 0.5–4       | 92.9                       |
|                                                    | Levofloxacin                  | >4                       | >4                | 0.06–>4     | 14.3                       |
| Multidrug-resistant (299) <sup>d</sup>             | Ceftazidime-avibactam         | 1                        | 4                 | ≤0.015–8    | 100                        |
|                                                    | Ceftazidime                   | 64                       | >128              | 0.12–>128   | 12.4                       |
|                                                    | Cefepime                      | >16                      | >16               | ≤0.12–>16   | 3.7                        |



| Organism, phenotype (no. of isolates) <sup>a</sup> | Antimicrobial agent                           | MIC (µg/ml) <sup>b</sup> |                   |             | % Susceptible <sup>c</sup> |     |
|----------------------------------------------------|-----------------------------------------------|--------------------------|-------------------|-------------|----------------------------|-----|
|                                                    |                                               | MIC <sub>50</sub>        | MIC <sub>90</sub> | Range       |                            |     |
|                                                    | Aztreonam                                     | 128                      | >128              | 0.12->128   | 5.4                        |     |
|                                                    | Piperacillin-tazobactam                       | 128                      | >128              | ≤0.25->128  | 32.4                       |     |
|                                                    | Doripenem                                     | 0.12                     | 2                 | 0.03->4     | 85.6                       |     |
|                                                    | Imipenem                                      | 0.5                      | 2                 | 0.06-8      | 88.6                       |     |
|                                                    | Meropenem                                     | 0.12                     | 2                 | 0.015-8     | 75.6                       |     |
|                                                    | Amikacin                                      | 8                        | >32               | 0.5->32     | 74.3                       |     |
|                                                    | Colistin (n=171) <sup>e</sup>                 | 1                        | >4                | 0.25->4     | 74.9                       |     |
|                                                    | Tigecycline                                   | 1                        | 4                 | 0.06->8     | 89.6                       |     |
|                                                    | Levofloxacin                                  | >4                       | >4                | ≤0.03->4    | 6.7                        |     |
|                                                    | <hr/>                                         |                          |                   |             |                            |     |
| <i>Escherichia coli</i> <sup>g,h</sup>             |                                               |                          |                   |             |                            |     |
| All (432) <sup>d</sup>                             | Ceftazidime-avibactam                         | 0.12                     | 0.25              | ≤0.015-1    | 100                        |     |
|                                                    | Ceftazidime                                   | 0.25                     | 32                | ≤0.015->128 | 81.3                       |     |
|                                                    | Cefepime                                      | ≤0.12                    | >16               | ≤0.12->16   | 75.5                       |     |
|                                                    | Aztreonam                                     | 0.12                     | 64                | ≤0.015->128 | 75.7                       |     |
|                                                    | Piperacillin-tazobactam                       | 2                        | 16                | ≤0.25->128  | 92.8                       |     |
|                                                    | Doripenem                                     | 0.03                     | 0.06              | ≤0.008-0.25 | 100                        |     |
|                                                    | Imipenem                                      | 0.25                     | 0.25              | ≤0.03-1     | 100                        |     |
|                                                    | Meropenem                                     | 0.03                     | 0.06              | ≤0.004-0.5  | 100                        |     |
|                                                    | Amikacin                                      | 4                        | 8                 | 0.5->32     | 95.8                       |     |
|                                                    | Colistin (n=214) <sup>e</sup>                 | 0.5                      | 1                 | ≤0.12-2     | 100                        |     |
|                                                    | Tigecycline                                   | 0.25                     | 0.5               | ≤0.015-2    | 100                        |     |
|                                                    | Levofloxacin                                  | 0.06                     | >4                | ≤0.03->4    | 66.0                       |     |
|                                                    | Ceftazidime non-susceptible (81) <sup>d</sup> | Ceftazidime-avibactam    | 0.25              | 0.5         | ≤0.015-1                   | 100 |
|                                                    |                                               | Ceftazidime              | 32                | 128         | 8->128                     | 0   |
|                                                    |                                               | Cefepime                 | >16               | >16         | ≤0.12->16                  | 2.5 |
| Aztreonam                                          |                                               | 64                       | 128               | 8->128      | 0                          |     |
| Piperacillin-tazobactam                            |                                               | 16                       | 64                | 1->128      | 74.1                       |     |
| Doripenem                                          |                                               | 0.03                     | 0.06              | ≤0.008-0.12 | 100                        |     |
| Imipenem                                           |                                               | 0.25                     | 0.5               | 0.06-1      | 100                        |     |
| Meropenem                                          |                                               | 0.03                     | 0.06              | 0.015-0.12  | 100                        |     |
| Amikacin                                           |                                               | 8                        | 32                | 1->32       | 84.0                       |     |
| Colistin (n=36) <sup>e</sup>                       |                                               | 0.5                      | 1                 | 0.25-1      | 100                        |     |
| Tigecycline                                        |                                               | 0.25                     | 0.5               | 0.06-1      | 100                        |     |
| Levofloxacin                                       |                                               | >4                       | >4                | ≤0.03->4    | 9.9                        |     |
| Multidrug-resistant (69) <sup>d</sup>              |                                               | Ceftazidime-avibactam    | 0.25              | 0.5         | ≤0.015-1                   | 100 |
|                                                    |                                               | Ceftazidime              | 64                | 128         | 0.12->128                  | 5.8 |
|                                                    |                                               | Cefepime                 | >16               | >16         | 8->16                      | 0   |
|                                                    | Aztreonam                                     | 64                       | 128               | 0.12->128   | 1.5                        |     |
|                                                    | Piperacillin-tazobactam                       | 16                       | 64                | 1->128      | 69.6                       |     |
|                                                    | Doripenem                                     | 0.03                     | 0.06              | 0.03-0.12   | 100                        |     |
|                                                    | Imipenem                                      | 0.25                     | 0.5               | 0.06-1      | 100                        |     |
|                                                    | Meropenem                                     | 0.03                     | 0.06              | 0.015-0.12  | 100                        |     |
|                                                    | Amikacin                                      | 8                        | >32               | 2->32       | 81.2                       |     |
|                                                    | Colistin (n=29) <sup>e</sup>                  | 0.5                      | 1                 | 0.25-1      | 100                        |     |
|                                                    | Tigecycline                                   | 0.25                     | 0.5               | 0.06-1      | 100                        |     |
|                                                    | Levofloxacin                                  | >4                       | >4                | ≤0.03->4    | 4.4                        |     |
|                                                    | <hr/>                                         |                          |                   |             |                            |     |
|                                                    | <i>Klebsiella pneumoniae</i>                  |                          |                   |             |                            |     |
|                                                    | All (341) <sup>d</sup>                        | Ceftazidime-avibactam    | 0.5               | 2           | ≤0.015-8                   | 100 |
| Ceftazidime                                        |                                               | 64                       | >128              | 0.03->128   | 35.8                       |     |
| Cefepime                                           |                                               | >16                      | >16               | ≤0.12->16   | 37.0                       |     |
| Aztreonam                                          |                                               | 64                       | >128              | ≤0.015->128 | 34.6                       |     |
| Piperacillin-tazobactam                            |                                               | 16                       | >128              | ≤0.25->128  | 50.4                       |     |
| Doripenem                                          |                                               | 0.06                     | 2                 | 0.03->4     | 87.7                       |     |
| Imipenem                                           |                                               | 0.25                     | 1                 | 0.06-8      | 97.4                       |     |
| Meropenem                                          |                                               | 0.06                     | 2                 | 0.015-8     | 78.6                       |     |
| Amikacin                                           |                                               | 2                        | >32               | ≤0.25->32   | 85.6                       |     |
| Colistin (n=215) <sup>e</sup>                      |                                               | 1                        | >4                | 0.25->4     | 87.4                       |     |
| Tigecycline                                        |                                               | 0.5                      | 2                 | 0.06-8      | 96.5                       |     |
| Levofloxacin                                       |                                               | >4                       | >4                | ≤0.03->4    | 44.3                       |     |

| Organism, phenotype (no. of isolates) <sup>a</sup> | Antimicrobial agent                         | MIC (µg/ml) <sup>b</sup> |                   |             | % Susceptible <sup>c</sup> |
|----------------------------------------------------|---------------------------------------------|--------------------------|-------------------|-------------|----------------------------|
|                                                    |                                             | MIC <sub>50</sub>        | MIC <sub>90</sub> | Range       |                            |
| Ceftazidime non-susceptible (219) <sup>d</sup>     | Ceftazidime-avibactam                       | 1                        | 4                 | 0.03–8      | 100                        |
|                                                    | Ceftazidime                                 | 128                      | >128              | 8–>128      | 0                          |
|                                                    | Cefepime                                    | >16                      | >16               | ≤0.12–>16   | 5.5                        |
|                                                    | Aztreonam                                   | 128                      | >128              | 1–>128      | 0.9                        |
|                                                    | Piperacillin-tazobactam                     | >128                     | >128              | 1–>128      | 27.4                       |
|                                                    | Doripenem                                   | 0.12                     | 2                 | 0.03–>4     | 81.3                       |
|                                                    | Imipenem                                    | 0.25                     | 1                 | 0.06–8      | 96.8                       |
|                                                    | Meropenem                                   | 0.12                     | 2                 | 0.015–8     | 67.6                       |
|                                                    | Amikacin                                    | 4                        | >32               | 0.5–>32     | 83.1                       |
|                                                    | Colistin (n=139) <sup>e</sup>               | 1                        | >4                | 0.25–>4     | 87.1                       |
|                                                    | Tigecycline                                 | 1                        | 2                 | 0.06–8      | 96.4                       |
|                                                    | Levofloxacin                                | >4                       | >4                | ≤0.03–>4    | 26.9                       |
|                                                    | Meropenem non-susceptible (73) <sup>d</sup> | Ceftazidime-avibactam    | 2                 | 4           | 0.5–8                      |
| Ceftazidime                                        |                                             | 128                      | >128              | 0.5–>128    | 2.7                        |
| Cefepime                                           |                                             | >16                      | >16               | 1–>16       | 1.4                        |
| Aztreonam                                          |                                             | >128                     | >128              | 2–>128      | 2.7                        |
| Piperacillin-tazobactam                            |                                             | >128                     | >128              | 128–>128    | 0                          |
| Doripenem                                          |                                             | 2                        | 4                 | 0.5–>4      | 43.8                       |
| Imipenem                                           |                                             | 0.5                      | 1                 | 0.25–8      | 91.8                       |
| Meropenem                                          |                                             | 2                        | 4                 | 2–8         | 0                          |
| Amikacin                                           |                                             | 8                        | >32               | 1–>32       | 63.0                       |
| Colistin (n=47) <sup>e</sup>                       |                                             | 1                        | >4                | 0.25–>4     | 63.8                       |
| Tigecycline                                        |                                             | 1                        | 2                 | 0.06–4      | 95.9                       |
| Levofloxacin                                       |                                             | >4                       | >4                | 0.12–>4     | 1.4                        |
| Colistin-resistant (27) <sup>d</sup>               |                                             | Ceftazidime-avibactam    | 2                 | 4           | 0.06–4                     |
|                                                    | Ceftazidime                                 | 64                       | 128               | 0.12–>128   | 33.3                       |
|                                                    | Cefepime                                    | >16                      | >16               | ≤0.12–>16   | 29.6                       |
|                                                    | Aztreonam                                   | 128                      | >128              | 0.06–>128   | 33.3                       |
|                                                    | Piperacillin-tazobactam                     | >128                     | >128              | 2–>128      | 33.3                       |
|                                                    | Doripenem                                   | 1                        | 4                 | 0.06–4      | 51.9                       |
|                                                    | Imipenem                                    | 0.5                      | 1                 | 0.12–1      | 100                        |
|                                                    | Meropenem                                   | 2                        | 4                 | 0.03–8      | 37.0                       |
|                                                    | Amikacin                                    | >32                      | >32               | 1–>32       | 29.6                       |
|                                                    | Colistin (n=27) <sup>e</sup>                | >4                       | >4                | 4–>4        | 0                          |
|                                                    | Tigecycline                                 | 1                        | 2                 | 0.5–4       | 92.6                       |
|                                                    | Levofloxacin                                | >4                       | >4                | 0.06–>4     | 11.1                       |
|                                                    | Multidrug-resistant (166) <sup>d</sup>      | Ceftazidime-avibactam    | 1                 | 4           | 0.06–8                     |
| Ceftazidime                                        |                                             | 128                      | >128              | 0.5–>128    | 3.6                        |
| Cefepime                                           |                                             | >16                      | >16               | ≤0.12–>16   | 4.8                        |
| Aztreonam                                          |                                             | >128                     | >128              | 0.25–>128   | 3.6                        |
| Piperacillin-tazobactam                            |                                             | >128                     | >128              | 2–>128      | 9.6                        |
| Doripenem                                          |                                             | 0.5                      | 2                 | 0.03–>4     | 74.7                       |
| Imipenem                                           |                                             | 0.25                     | 1                 | 0.12–8      | 95.8                       |
| Meropenem                                          |                                             | 1                        | 4                 | 0.015–8     | 56.6                       |
| Amikacin                                           |                                             | 4                        | >32               | 0.5–>32     | 74.7                       |
| Colistin (n=105) <sup>e</sup>                      |                                             | 1                        | >4                | 0.25–>4     | 78.1                       |
| Tigecycline                                        |                                             | 1                        | 2                 | 0.06–8      | 95.2                       |
| Levofloxacin                                       |                                             | >4                       | >4                | 0.06–>4     | 4.8                        |
| <i>Klebsiella oxytoca</i> <sup>g</sup>             |                                             |                          |                   |             |                            |
| All (68) <sup>d</sup>                              | Ceftazidime-avibactam                       | 0.12                     | 0.5               | ≤0.015–1    | 100                        |
|                                                    | Ceftazidime                                 | 0.12                     | 8                 | 0.03–>128   | 89.7                       |
|                                                    | Cefepime                                    | ≤0.12                    | 4                 | ≤0.12–>16   | 85.3                       |
|                                                    | Aztreonam                                   | 0.12                     | 64                | ≤0.015–>128 | 76.5                       |
|                                                    | Piperacillin-tazobactam                     | 2                        | >128              | 0.5–>128    | 83.8                       |
|                                                    | Doripenem                                   | 0.06                     | 0.12              | 0.03–0.25   | 100                        |
|                                                    | Imipenem                                    | 0.25                     | 0.5               | 0.12–2      | 98.5                       |
|                                                    | Meropenem                                   | 0.03                     | 0.06              | 0.03–0.25   | 100                        |
|                                                    | Amikacin                                    | 1                        | 4                 | 0.5–>32     | 97.1                       |
|                                                    | Colistin (n=41) <sup>e</sup>                | 0.5                      | 1                 | 0.25–4      | 97.6                       |
|                                                    | Tigecycline                                 | 0.25                     | 1                 | 0.06–2      | 100                        |

| Organism, phenotype (no. of isolates) <sup>a</sup> | Antimicrobial agent                           | MIC (µg/ml) <sup>b</sup> |                   |             | % Susceptible <sup>c</sup> |     |
|----------------------------------------------------|-----------------------------------------------|--------------------------|-------------------|-------------|----------------------------|-----|
|                                                    |                                               | MIC <sub>50</sub>        | MIC <sub>90</sub> | Range       |                            |     |
|                                                    | Levofloxacin                                  | 0.06                     | 1                 | ≤0.03->4    | 95.6                       |     |
| Ceftazidime non-susceptible (7) <sup>d</sup>       | Ceftazidime-avibactam                         | — <sup>b</sup>           | —                 | 0.03-1      | 100                        |     |
|                                                    | Ceftazidime                                   | —                        | —                 | 8->128      | 0                          |     |
|                                                    | Cefepime                                      | —                        | —                 | 0.5->16     | 42.9                       |     |
|                                                    | Aztreonam                                     | —                        | —                 | 64->128     | 0                          |     |
|                                                    | Piperacillin-tazobactam                       | —                        | —                 | 2->128      | 28.6                       |     |
|                                                    | Doripenem                                     | —                        | —                 | 0.06-0.25   | 100                        |     |
|                                                    | Imipenem                                      | —                        | —                 | 0.25-2      | 85.7                       |     |
|                                                    | Meropenem                                     | —                        | —                 | 0.03-0.25   | 100                        |     |
|                                                    | Amikacin                                      | —                        | —                 | 2->32       | 85.7                       |     |
|                                                    | Colistin (n=5) <sup>e</sup>                   | —                        | —                 | 0.25-1      | 100                        |     |
|                                                    | Tigecycline                                   | —                        | —                 | 0.25-2      | 100                        |     |
|                                                    | Levofloxacin                                  | —                        | —                 | 0.12->4     | 85.7                       |     |
| Colistin-resistant (1) <sup>d</sup>                | Ceftazidime-avibactam                         | — <sup>b</sup>           | —                 | 0.12        | 100                        |     |
|                                                    | Ceftazidime                                   | —                        | —                 | 0.25        | 100                        |     |
|                                                    | Cefepime                                      | —                        | —                 | 0.25        | 100                        |     |
|                                                    | Aztreonam                                     | —                        | —                 | 0.12        | 100                        |     |
|                                                    | Piperacillin-tazobactam                       | —                        | —                 | 4           | 100                        |     |
|                                                    | Doripenem                                     | —                        | —                 | 0.06        | 100                        |     |
|                                                    | Imipenem                                      | —                        | —                 | 0.25        | 100                        |     |
|                                                    | Meropenem                                     | —                        | —                 | 0.03        | 100                        |     |
|                                                    | Amikacin                                      | —                        | —                 | 2           | 100                        |     |
|                                                    | Colistin (n=1) <sup>e</sup>                   | —                        | —                 | 4           | 0                          |     |
|                                                    | Tigecycline                                   | —                        | —                 | 0.5         | 100                        |     |
|                                                    | Levofloxacin                                  | —                        | —                 | 2           | 100                        |     |
| Multidrug-resistant (3) <sup>d</sup>               | Ceftazidime-avibactam                         | — <sup>b</sup>           | —                 | 0.5-1       | 100                        |     |
|                                                    | Ceftazidime                                   | —                        | —                 | 32->128     | 0                          |     |
|                                                    | Cefepime                                      | —                        | —                 | 4->16       | 0                          |     |
|                                                    | Aztreonam                                     | —                        | —                 | 64->128     | 0                          |     |
|                                                    | Piperacillin-tazobactam                       | —                        | —                 | 128->128    | 0                          |     |
|                                                    | Doripenem                                     | —                        | —                 | 0.06-0.12   | 100                        |     |
|                                                    | Imipenem                                      | —                        | —                 | 0.25-1      | 100                        |     |
|                                                    | Meropenem                                     | —                        | —                 | 0.06-0.12   | 100                        |     |
|                                                    | Amikacin                                      | —                        | —                 | 8->32       | 66.7                       |     |
|                                                    | Colistin (n=1) <sup>e</sup>                   | —                        | —                 | 0.25        | 100                        |     |
|                                                    | Tigecycline                                   | —                        | —                 | 1-2         | 100                        |     |
|                                                    | Levofloxacin                                  | —                        | —                 | 0.12->4     | 66.7                       |     |
| <i>Enterobacter</i> spp. <sup>h</sup>              |                                               |                          |                   |             |                            |     |
| All (126) <sup>d,i</sup>                           | Ceftazidime-avibactam                         | 0.25                     | 1                 | ≤0.015-4    | 100                        |     |
|                                                    | Ceftazidime                                   | 1                        | >128              | 0.03->128   | 57.9                       |     |
|                                                    | Cefepime                                      | 0.25                     | >16               | ≤0.12->16   | 73.8                       |     |
|                                                    | Aztreonam                                     | 0.5                      | 128               | ≤0.015->128 | 55.6                       |     |
|                                                    | Piperacillin-tazobactam                       | 4                        | >128              | ≤0.25->128  | 67.5                       |     |
|                                                    | Doripenem                                     | 0.06                     | 0.25              | 0.015-4     | 99.2                       |     |
|                                                    | Imipenem                                      | 0.5                      | 2                 | 0.12-8      | 84.9                       |     |
|                                                    | Meropenem                                     | 0.06                     | 0.25              | 0.015-4     | 99.2                       |     |
|                                                    | Amikacin                                      | 1                        | 16                | 0.5->32     | 95.2                       |     |
|                                                    | Colistin (n=66) <sup>e</sup>                  | 0.5                      | 1                 | 0.25-2      | 100                        |     |
|                                                    | Tigecycline                                   | 0.5                      | 2                 | 0.12-8      | 96.8                       |     |
|                                                    | Levofloxacin                                  | 0.06                     | >4                | ≤0.03->4    | 81.0                       |     |
|                                                    | Ceftazidime non-susceptible (53) <sup>d</sup> | Ceftazidime-avibactam    | 0.5               | 2           | 0.12-4                     | 100 |
|                                                    |                                               | Ceftazidime              | 128               | >128        | 8->128                     | 0   |
| Cefepime                                           |                                               | 2                        | >16               | ≤0.12->16   | 50.9                       |     |
| Aztreonam                                          |                                               | 64                       | >128              | 0.06->128   | 5.7                        |     |
| Piperacillin-tazobactam                            |                                               | 64                       | >128              | 2->128      | 28.3                       |     |
| Doripenem                                          |                                               | 0.12                     | 0.5               | 0.015-4     | 98.1                       |     |
| Imipenem                                           |                                               | 0.5                      | 1                 | 0.12-8      | 90.6                       |     |
| Meropenem                                          |                                               | 0.12                     | 0.5               | 0.03-4      | 98.1                       |     |
| Amikacin                                           |                                               | 2                        | 16                | 0.5->32     | 90.6                       |     |

| Organism, phenotype (no. of isolates) <sup>a</sup> | Antimicrobial agent          | MIC (µg/ml) <sup>b</sup> |                   |                 | % Susceptible <sup>c</sup> |
|----------------------------------------------------|------------------------------|--------------------------|-------------------|-----------------|----------------------------|
|                                                    |                              | MIC <sub>50</sub>        | MIC <sub>90</sub> | Range           |                            |
|                                                    | Colistin (n=27) <sup>e</sup> | 0.5                      | 1                 | 0.25–1          | 100                        |
|                                                    | Tigecycline                  | 1                        | 2                 | 0.12–8          | 94.3                       |
|                                                    | Levofloxacin                 | 1                        | >4                | 0.06–>4         | 60.4                       |
| Meropenem non-susceptible (1) <sup>d</sup>         | Ceftazidime-avibactam        | — <sup>b</sup>           | —                 | 1               | 100                        |
|                                                    | Ceftazidime                  | —                        | —                 | 128             | 0                          |
|                                                    | Cefepime                     | —                        | —                 | 8               | 0                          |
|                                                    | Aztreonam                    | —                        | —                 | 32              | 0                          |
|                                                    | Piperacillin-tazobactam      | —                        | —                 | 128             | 0                          |
|                                                    | Doripenem                    | —                        | —                 | 4               | 0                          |
|                                                    | Imipenem                     | —                        | —                 | 8               | 0                          |
|                                                    | Meropenem                    | —                        | —                 | 4               | 0                          |
|                                                    | Amikacin                     | —                        | —                 | 4               | 100                        |
|                                                    | Colistin (n=0) <sup>e</sup>  | —                        | —                 | ND <sup>e</sup> | ND                         |
|                                                    | Tigecycline                  | —                        | —                 | 2               | 100                        |
|                                                    | Levofloxacin                 | —                        | —                 | >4              | 0                          |
| Multidrug-resistant (20) <sup>d</sup>              | Ceftazidime-avibactam        | 1                        | 2                 | 0.12–4          | 100                        |
|                                                    | Ceftazidime                  | 128                      | >128              | 2–>128          | 10.0                       |
|                                                    | Cefepime                     | >16                      | >16               | 1–>16           | 5.0                        |
|                                                    | Aztreonam                    | 128                      | >128              | 32–>128         | 0                          |
|                                                    | Piperacillin-tazobactam      | >128                     | >128              | 4–>128          | 15.0                       |
|                                                    | Doripenem                    | 0.12                     | 0.5               | 0.06–4          | 95.0                       |
|                                                    | Imipenem                     | 0.5                      | 1                 | 0.25–8          | 90.0                       |
|                                                    | Meropenem                    | 0.12                     | 0.5               | 0.06–4          | 95.0                       |
|                                                    | Amikacin                     | 4                        | 32                | 1–>32           | 75.0                       |
|                                                    | Colistin (n=12) <sup>e</sup> | 0.5                      | 1                 | 0.25–1          | 100                        |
|                                                    | Tigecycline                  | 1                        | 2                 | 0.5–8           | 90.0                       |
|                                                    | Levofloxacin                 | >4                       | >4                | 1–>4            | 5.0                        |
| <i>Citrobacter</i> spp. <sup>g,h</sup>             |                              |                          |                   |                 |                            |
| All (68) <sup>d,j</sup>                            | Ceftazidime-avibactam        | 0.12                     | 0.5               | ≤0.015–4        | 100                        |
|                                                    | Ceftazidime                  | 0.5                      | 128               | 0.12–>128       | 64.7                       |
|                                                    | Cefepime                     | 0.25                     | >16               | ≤0.12–>16       | 77.9                       |
|                                                    | Aztreonam                    | 0.25                     | 64                | 0.06–>128       | 58.8                       |
|                                                    | Piperacillin-tazobactam      | 4                        | 128               | 1–>128          | 80.9                       |
|                                                    | Doripenem                    | 0.06                     | 0.12              | 0.015–0.12      | 100                        |
|                                                    | Imipenem                     | 0.5                      | 1                 | 0.12–2          | 92.7                       |
|                                                    | Meropenem                    | 0.03                     | 0.06              | 0.015–0.12      | 100                        |
|                                                    | Amikacin                     | 2                        | 8                 | 1–>32           | 94.1                       |
|                                                    | Colistin (n=38) <sup>e</sup> | 0.5                      | 1                 | 0.25–2          | 100                        |
|                                                    | Tigecycline                  | 0.5                      | 1                 | 0.12–4          | 98.5                       |
|                                                    | Levofloxacin                 | 0.06                     | >4                | ≤0.03–>4        | 80.9                       |
| Ceftazidime non-susceptible (24) <sup>d</sup>      | Ceftazidime-avibactam        | 0.25                     | 0.5               | 0.03–4          | 100                        |
|                                                    | Ceftazidime                  | 64                       | 128               | 8–>128          | 0                          |
|                                                    | Cefepime                     | 2                        | >16               | ≤0.12–>16       | 54.2                       |
|                                                    | Aztreonam                    | 32                       | 128               | 2–>128          | 4.2                        |
|                                                    | Piperacillin-tazobactam      | 16                       | 128               | 2–>128          | 54.2                       |
|                                                    | Doripenem                    | 0.06                     | 0.12              | 0.03–0.12       | 100                        |
|                                                    | Imipenem                     | 0.5                      | 1                 | 0.12–2          | 91.7                       |
|                                                    | Meropenem                    | 0.06                     | 0.06              | 0.015–0.12      | 100                        |
|                                                    | Amikacin                     | 2                        | 32                | 1–>32           | 83.3                       |
|                                                    | Colistin (n=11) <sup>e</sup> | 1                        | 1                 | 0.25–1          | 100                        |
|                                                    | Tigecycline                  | 0.5                      | 2                 | 0.25–4          | 95.8                       |
|                                                    | Levofloxacin                 | 0.25                     | >4                | ≤0.03–>4        | 62.5                       |
| Multidrug-resistant (8) <sup>d</sup>               | Ceftazidime-avibactam        | — <sup>b</sup>           | —                 | 0.03–4          | 100                        |
|                                                    | Ceftazidime                  | —                        | —                 | 4–>128          | 25.0                       |
|                                                    | Cefepime                     | —                        | —                 | 16–>16          | 0                          |
|                                                    | Aztreonam                    | —                        | —                 | 16–>128         | 0                          |
|                                                    | Piperacillin-tazobactam      | —                        | —                 | 8–>128          | 50.0                       |
|                                                    | Doripenem                    | —                        | —                 | 0.03–0.12       | 100                        |
|                                                    | Imipenem                     | —                        | —                 | 0.5–2           | 75.0                       |

| Organism, phenotype (no. of isolates) <sup>a</sup> | Antimicrobial agent          | MIC (µg/ml) <sup>b</sup> |                   |             | % Susceptible <sup>c</sup> |
|----------------------------------------------------|------------------------------|--------------------------|-------------------|-------------|----------------------------|
|                                                    |                              | MIC <sub>50</sub>        | MIC <sub>90</sub> | Range       |                            |
|                                                    | Meropenem                    | —                        | —                 | 0.03–0.12   | 100                        |
|                                                    | Amikacin                     | —                        | —                 | 2–>32       | 50.0                       |
|                                                    | Colistin (n=3) <sup>e</sup>  | —                        | —                 | 1–1         | 100                        |
|                                                    | Tigecycline                  | —                        | —                 | 0.5–2       | 100                        |
|                                                    | Levofloxacin                 | —                        | —                 | 4–>4        | 0.0                        |
| <hr/>                                              |                              |                          |                   |             |                            |
| Proteaceae <sup>g</sup>                            |                              |                          |                   |             |                            |
| All (162) <sup>d,k</sup>                           | Ceftazidime-avibactam        | 0.06                     | 0.12              | ≤0.015–1    | 100                        |
|                                                    | Ceftazidime                  | 0.12                     | 4                 | ≤0.015–64   | 90.1                       |
|                                                    | Cefepime                     | ≤0.12                    | >16               | ≤0.12–>16   | 74.1                       |
|                                                    | Aztreonam                    | 0.06                     | 8                 | ≤0.015–>128 | 85.2                       |
|                                                    | Piperacillin-tazobactam      | 0.5                      | 2                 | ≤0.25–64    | 99.4                       |
|                                                    | Doripenem                    | 0.25                     | 0.5               | 0.015–2     | 98.8                       |
|                                                    | Imipenem                     | 2                        | 4                 | 0.12–8      | 17.3                       |
|                                                    | Meropenem                    | 0.12                     | 0.12              | 0.03–1      | 100                        |
|                                                    | Amikacin                     | 4                        | 16                | ≤0.25–>32   | 90.7                       |
|                                                    | Colistin (n=91) <sup>e</sup> | >4                       | >4                | >4–>4       | 0                          |
|                                                    | Tigecycline                  | 2                        | 4                 | 0.5–>8      | 56.8                       |
|                                                    | Levofloxacin                 | 0.12                     | >4                | ≤0.03–>4    | 63.6                       |
| Ceftazidime-non-susceptible (16) <sup>d</sup>      | Ceftazidime-avibactam        | 0.06                     | 0.25              | 0.03–0.5    | 100                        |
|                                                    | Ceftazidime                  | 16                       | 64                | 8–64        | 0                          |
|                                                    | Cefepime                     | ≤0.12                    | >16               | ≤0.12–>16   | 75.0                       |
|                                                    | Aztreonam                    | 2                        | 16                | 0.5–>128    | 68.8                       |
|                                                    | Piperacillin-tazobactam      | 0.5                      | 16                | ≤0.25–16    | 100                        |
|                                                    | Doripenem                    | 0.25                     | 0.5               | 0.25–0.5    | 100                        |
|                                                    | Imipenem                     | 4                        | 4                 | 2–4         | 0                          |
|                                                    | Meropenem                    | 0.12                     | 0.12              | 0.06–0.25   | 100                        |
|                                                    | Amikacin                     | 2                        | 32                | 1–32        | 87.5                       |
|                                                    | Colistin (n=12) <sup>e</sup> | >4                       | >4                | >4–>4       | 0                          |
|                                                    | Tigecycline                  | 2                        | 4                 | 1–4         | 75.0                       |
|                                                    | Levofloxacin                 | 1                        | >4                | 0.06–>4     | 56.3                       |
| Multidrug-resistant (25) <sup>d</sup>              | Ceftazidime-avibactam        | 0.06                     | 0.12              | ≤0.015–0.25 | 100                        |
|                                                    | Ceftazidime                  | 1                        | 4                 | 0.25–8      | 92.0                       |
|                                                    | Cefepime                     | >16                      | >16               | 2–>16       | 4.0                        |
|                                                    | Aztreonam                    | 16                       | 64                | 0.25–>128   | 36.0                       |
|                                                    | Piperacillin-tazobactam      | 1                        | 2                 | ≤0.25–64    | 96.0                       |
|                                                    | Doripenem                    | 0.5                      | 0.5               | 0.12–1      | 100                        |
|                                                    | Imipenem                     | 4                        | 4                 | 0.25–8      | 8.0                        |
|                                                    | Meropenem                    | 0.12                     | 0.25              | 0.06–0.5    | 100                        |
|                                                    | Amikacin                     | 16                       | >32               | 2–>32       | 64.0                       |
|                                                    | Colistin (n=15) <sup>e</sup> | >4                       | >4                | >4–>4       | 0                          |
|                                                    | Tigecycline                  | 4                        | 8                 | 0.5–>8      | 24.0                       |
|                                                    | Levofloxacin                 | >4                       | >4                | 0.12–>4     | 4.0                        |
| <hr/>                                              |                              |                          |                   |             |                            |
| Other <i>Enterobacteriaceae</i> <sup>g,h</sup>     |                              |                          |                   |             |                            |
| All (39) <sup>d,l</sup>                            | Ceftazidime-avibactam        | 0.25                     | 1                 | 0.06–4      | 100                        |
|                                                    | Ceftazidime                  | 0.25                     | 64                | 0.12–>128   | 66.7                       |
|                                                    | Cefepime                     | 0.25                     | >16               | ≤0.12–>16   | 76.9                       |
|                                                    | Aztreonam                    | 0.25                     | 128               | 0.06–>128   | 66.7                       |
|                                                    | Piperacillin-tazobactam      | 2                        | 128               | 0.5–>128    | 84.6                       |
|                                                    | Doripenem                    | 0.12                     | 0.25              | 0.06–0.5    | 100                        |
|                                                    | Imipenem                     | 0.5                      | 2                 | 0.25–4      | 89.7                       |
|                                                    | Meropenem                    | 0.06                     | 0.25              | 0.03–0.5    | 100                        |
|                                                    | Amikacin                     | 2                        | 32                | 0.5–>32     | 89.7                       |
|                                                    | Colistin (n=20) <sup>e</sup> | >4                       | >4                | 1–>4        | 15.0                       |
|                                                    | Tigecycline                  | 2                        | 2                 | 0.5–8       | 92.3                       |
|                                                    | Levofloxacin                 | 0.25                     | 4                 | ≤0.03–>4    | 89.7                       |
| Ceftazidime-non-susceptible (13) <sup>d</sup>      | Ceftazidime-avibactam        | 0.5                      | 1                 | 0.25–4      | 100                        |
|                                                    | Ceftazidime                  | 16                       | >128              | 8–>128      | 0                          |
|                                                    | Cefepime                     | >16                      | >16               | ≤0.12–>16   | 30.8                       |
|                                                    | Aztreonam                    | 128                      | >128              | 32–>128     | 0                          |

| Organism, phenotype (no. of isolates) <sup>a</sup> | Antimicrobial agent                  | MIC (µg/ml) <sup>b</sup> |                   |            | % Susceptible <sup>c</sup> |      |
|----------------------------------------------------|--------------------------------------|--------------------------|-------------------|------------|----------------------------|------|
|                                                    |                                      | MIC <sub>50</sub>        | MIC <sub>90</sub> | Range      |                            |      |
|                                                    | Piperacillin-tazobactam              | 16                       | >128              | 0.5->128   | 53.9                       |      |
|                                                    | Doripenem                            | 0.25                     | 0.5               | 0.06-0.5   | 100                        |      |
|                                                    | Imipenem                             | 1                        | 1                 | 0.25-1     | 100                        |      |
|                                                    | Meropenem                            | 0.12                     | 0.5               | 0.06-0.5   | 100                        |      |
|                                                    | Amikacin                             | 8                        | 32                | 2->32      | 76.9                       |      |
|                                                    | Colistin (n=8) <sup>e</sup>          | — <sup>b</sup>           | —                 | 1->4       | 25.0                       |      |
|                                                    | Tigecycline                          | 2                        | 4                 | 1-8        | 84.6                       |      |
|                                                    | Levofloxacin                         | 1                        | >4                | 0.25->4    | 76.9                       |      |
|                                                    | Multidrug-resistant (8) <sup>d</sup> | Ceftazidime-avibactam    | — <sup>b</sup>    | —          | 0.25-4                     | 100  |
|                                                    |                                      | Ceftazidime              | —                 | —          | 8->128                     | 0    |
|                                                    |                                      | Cefepime                 | —                 | —          | 0.5->16                    | 12.5 |
| Aztreonam                                          |                                      | —                        | —                 | 64->128    | 0                          |      |
| Piperacillin-tazobactam                            |                                      | —                        | —                 | 0.5->128   | 25.0                       |      |
| Doripenem                                          |                                      | —                        | —                 | 0.06-0.5   | 100                        |      |
| Imipenem                                           |                                      | —                        | —                 | 0.25-1     | 100                        |      |
| Meropenem                                          |                                      | —                        | —                 | 0.06-0.5   | 100                        |      |
| Amikacin                                           |                                      | —                        | —                 | 4->32      | 62.5                       |      |
| Colistin (n=6) <sup>e</sup>                        |                                      | —                        | —                 | 2->4       | 16.7                       |      |
| Tigecycline                                        |                                      | —                        | —                 | 1-8        | 75.0                       |      |
| Levofloxacin                                       |                                      | —                        | —                 | 0.5->4     | 62.5                       |      |
| <i>Pseudomonas aeruginosa</i> <sup>h</sup>         |                                      |                          |                   |            |                            |      |
| All (282)                                          |                                      | Ceftazidime-avibactam    | 4                 | 32         | 0.25->128                  | 79.1 |
|                                                    | Ceftazidime                          | 8                        | 128               | 0.5->128   | 51.1                       |      |
|                                                    | Cefepime                             | 8                        | >16               | 0.25->16   | 57.5                       |      |
|                                                    | Aztreonam                            | 16                       | >128              | 0.25->128  | 42.6                       |      |
|                                                    | Piperacillin-tazobactam              | 32                       | >128              | ≤0.25->128 | 48.6                       |      |
|                                                    | Doripenem                            | 2                        | >4                | 0.12->4    | 55.3                       |      |
|                                                    | Imipenem                             | 8                        | >8                | 0.25->8    | 42.9                       |      |
|                                                    | Meropenem                            | 2                        | >8                | ≤0.06->8   | 53.2                       |      |
|                                                    | Amikacin                             | 4                        | >32               | ≤0.25->32  | 79.8                       |      |
|                                                    | Colistin (n=203) <sup>e</sup>        | 2                        | 2                 | 0.5-4      | 95.1                       |      |
|                                                    | Levofloxacin                         | 2                        | >4                | ≤0.03->4   | 54.3                       |      |
|                                                    | All, MBL-negative (249)              | Ceftazidime-avibactam    | 2                 | 16         | 0.25->128                  | 89.2 |
|                                                    |                                      | Ceftazidime              | 4                 | 128        | 0.5->128                   | 57.4 |
| Cefepime                                           |                                      | 8                        | >16               | 0.25->16   | 62.7                       |      |
| Aztreonam                                          |                                      | 16                       | >128              | 0.25->128  | 45.8                       |      |
| Piperacillin-tazobactam                            |                                      | 16                       | >128              | ≤0.25->128 | 54.6                       |      |
| Doripenem                                          |                                      | 1                        | >4                | 0.12->4    | 61.5                       |      |
| Imipenem                                           |                                      | 4                        | >8                | 0.25->8    | 48.6                       |      |
| Meropenem                                          |                                      | 1                        | >8                | ≤0.06->8   | 59.0                       |      |
| Amikacin                                           |                                      | 4                        | 32                | ≤0.25->32  | 88.0                       |      |
| Colistin (n=173) <sup>e</sup>                      |                                      | 2                        | 2                 | 0.5-4      | 96.0                       |      |
| Levofloxacin                                       |                                      | 1                        | >4                | ≤0.03->4   | 59.0                       |      |
| Ceftazidime-non-susceptible (138)                  | Ceftazidime-avibactam                | 8                        | 64                | 0.5->128   | 57.3                       |      |
|                                                    | Ceftazidime                          | 64                       | >128              | 16->128    | 0                          |      |
|                                                    | Cefepime                             | 16                       | >16               | 4->16      | 16.7                       |      |
|                                                    | Aztreonam                            | 32                       | >128              | 4->128     | 4.4                        |      |
|                                                    | Piperacillin-tazobactam              | 128                      | >128              | 8->128     | 7.3                        |      |
|                                                    | Doripenem                            | >4                       | >4                | 0.25->4    | 26.1                       |      |
|                                                    | Imipenem                             | >8                       | >8                | 1->8       | 17.4                       |      |
|                                                    | Meropenem                            | >8                       | >8                | 0.12->8    | 24.6                       |      |
|                                                    | Amikacin                             | 8                        | >32               | 0.5->32    | 62.3                       |      |
|                                                    | Colistin (n=110) <sup>e</sup>        | 2                        | 2                 | 0.5-4      | 93.6                       |      |
|                                                    | Levofloxacin                         | >4                       | >4                | 0.25->4    | 25.4                       |      |
| Ceftazidime-non-susceptible, MBL-negative (106)    | Ceftazidime-avibactam                | 8                        | 32                | 0.5->128   | 74.5                       |      |
|                                                    | Ceftazidime                          | 64                       | >128              | 16->128    | 0                          |      |
|                                                    | Cefepime                             | >16                      | >16               | 4->16      | 17.0                       |      |
|                                                    | Aztreonam                            | 128                      | >128              | 8->128     | 0.9                        |      |
|                                                    | Piperacillin-tazobactam              | 128                      | >128              | 8->128     | 9.4                        |      |

| Organism, phenotype (no. of isolates) <sup>a</sup> | Antimicrobial agent           | MIC (µg/ml) <sup>b</sup> |                   |          | % Susceptible <sup>c</sup> |
|----------------------------------------------------|-------------------------------|--------------------------|-------------------|----------|----------------------------|
|                                                    |                               | MIC <sub>50</sub>        | MIC <sub>90</sub> | Range    |                            |
|                                                    | Doripenem                     | >4                       | >4                | 0.25->4  | 31.1                       |
|                                                    | Imipenem                      | >8                       | >8                | 1->8     | 22.6                       |
|                                                    | Meropenem                     | 8                        | >8                | 0.12->8  | 29.3                       |
|                                                    | Amikacin                      | 8                        | >32               | 0.5->32  | 76.4                       |
|                                                    | Colistin (n=81) <sup>e</sup>  | 2                        | 2                 | 0.5-4    | 95.1                       |
|                                                    | Levofloxacin                  | >4                       | >4                | 0.25->4  | 27.4                       |
| Meropenem non-susceptible (132)                    | Ceftazidime-avibactam         | 8                        | 64                | 0.5->128 | 59.9                       |
|                                                    | Ceftazidime                   | 32                       | >128              | 2->128   | 21.2                       |
|                                                    | Cefepime                      | >16                      | >16               | 2->16    | 26.5                       |
|                                                    | Aztreonam                     | 32                       | >128              | 2->128   | 12.9                       |
|                                                    | Piperacillin-tazobactam       | 64                       | >128              | 2->128   | 18.9                       |
|                                                    | Doripenem                     | >4                       | >4                | 1->4     | 6.1                        |
|                                                    | Imipenem                      | >8                       | >8                | 2->8     | 0.8                        |
|                                                    | Meropenem                     | >8                       | >8                | 4->8     | 0                          |
|                                                    | Amikacin                      | 16                       | >32               | 1->32    | 63.6                       |
|                                                    | Colistin (n=104) <sup>e</sup> | 2                        | 2                 | 0.5-4    | 93.3                       |
|                                                    | Levofloxacin                  | >4                       | >4                | 0.25->4  | 24.2                       |
| Meropenem non-susceptible, MBL-negative (102)      | Ceftazidime-avibactam         | 8                        | 32                | 0.5->128 | 76.5                       |
|                                                    | Ceftazidime                   | 64                       | >128              | 2->128   | 26.5                       |
|                                                    | Cefepime                      | >16                      | >16               | 2->16    | 29.4                       |
|                                                    | Aztreonam                     | 64                       | >128              | 2->128   | 10.8                       |
|                                                    | Piperacillin-tazobactam       | 128                      | >128              | 2->128   | 23.5                       |
|                                                    | Doripenem                     | >4                       | >4                | 1->4     | 7.8                        |
|                                                    | Imipenem                      | >8                       | >8                | 2->8     | 1.0                        |
|                                                    | Meropenem                     | >8                       | >8                | 4->8     | 0                          |
|                                                    | Amikacin                      | 8                        | >32               | 1->32    | 76.5                       |
|                                                    | Colistin (n=75) <sup>e</sup>  | 2                        | 2                 | 0.5-4    | 94.7                       |
|                                                    | Levofloxacin                  | >4                       | >4                | 0.25->4  | 25.5                       |
| Multidrug-resistant (96)                           | Ceftazidime-avibactam         | 8                        | 64                | 0.5->128 | 57.3                       |
|                                                    | Ceftazidime                   | 64                       | >128              | 4->128   | 8.3                        |
|                                                    | Cefepime                      | >16                      | >16               | 8->16    | 5.2                        |
|                                                    | Aztreonam                     | 128                      | >128              | 8->128   | 2.1                        |
|                                                    | Piperacillin-tazobactam       | >128                     | >128              | 2->128   | 7.3                        |
|                                                    | Doripenem                     | >4                       | >4                | 0.12->4  | 7.3                        |
|                                                    | Imipenem                      | >8                       | >8                | 1->8     | 7.3                        |
|                                                    | Meropenem                     | >8                       | >8                | 0.12->8  | 7.3                        |
|                                                    | Amikacin                      | 16                       | >32               | 1->32    | 58.3                       |
|                                                    | Colistin (n=79) <sup>e</sup>  | 2                        | 2                 | 0.5-4    | 92.4                       |
|                                                    | Levofloxacin                  | >4                       | >4                | 0.25->4  | 8.3                        |
| Multidrug-resistant, MBL-negative (76)             | Ceftazidime-avibactam         | 8                        | 64                | 0.5->128 | 72.4                       |
|                                                    | Ceftazidime                   | 64                       | >128              | 4->128   | 10.5                       |
|                                                    | Cefepime                      | >16                      | >16               | 8->16    | 6.6                        |
|                                                    | Aztreonam                     | 128                      | >128              | 16->128  | 0                          |
|                                                    | Piperacillin-tazobactam       | >128                     | >128              | 2->128   | 9.2                        |
|                                                    | Doripenem                     | >4                       | >4                | 0.12->4  | 9.2                        |
|                                                    | Imipenem                      | >8                       | >8                | 1->8     | 9.2                        |
|                                                    | Meropenem                     | >8                       | >8                | 0.12->8  | 9.2                        |
|                                                    | Amikacin                      | 8                        | >32               | 1->32    | 71.1                       |
|                                                    | Colistin (n=59) <sup>e</sup>  | 2                        | 2                 | 0.5-4    | 93.2                       |
|                                                    | Levofloxacin                  | >4                       | >4                | 0.25->4  | 5.3                        |

258 <sup>a</sup> MBL-negative, no gene encoding a metallo-β-lactamase was detected by polymerase chain reaction assay.

259 <sup>b</sup> —, MIC<sub>50</sub> and MIC<sub>90</sub> were not calculated for n <10 isolates.

260 <sup>c</sup> % Susceptibility was determined according to CLSI 2016 breakpoints with the exception of ceftazidime-avibactam  
261 and tigecycline where US FDA breakpoints were applied and colistin where EUCAST breakpoints were applied.

262 <sup>d</sup> All isolates were MBL-negative.

263 <sup>e</sup> Values are for colistin tested without 0.002% polysorbate-80; isolates collected in 2014-2015 only. ND, not  
264 determined; MIC range and % susceptible were not determined for n=0 isolates.  
265 <sup>f</sup> Excluded isolates of Proteeae and *Serratia* spp., which are intrinsically resistant to colistin.  
266 <sup>g</sup> No meropenem non-susceptible isolates were collected.  
267 <sup>h</sup> No colistin-resistant isolates were collected.  
268 <sup>i</sup> *Enterobacter* spp. included *Enterobacter aerogenes* (n=30), *Enterobacter amnigenus* (n=1), *Enterobacter asburiae*  
269 (n=1), *Enterobacter cloacae* (n=87), *Enterobacter kobei* (n=4), and *Enterobacter ludwigii* (n=3).  
270 <sup>j</sup> *Citrobacter* spp. included *Citrobacter amalonaticus* (n=2), *Citrobacter braakii* (n=9), *Citrobacter freundii* (n=51),  
271 and *Citrobacter koseri* (n=6).  
272 <sup>k</sup> Proteeae included *Morganella morganii* (n=40), *Proteus mirabilis* (n=87), *Proteus penneri* (n=3), *Proteus vulgaris*  
273 (n=26), *Providencia rettgeri* (n=1), and *Providencia stuartii* (n=5).  
274 <sup>l</sup> Other *Enterobacteriaceae* included *Kluyvera ascorbata* (n=1), *Serratia liquefaciens* (n=2), and *Serratia*  
275 *marcescens* (n=36).



276 **Table S4B.** Chile - *In vitro* activities of ceftazidime-avibactam and comparator antimicrobial  
 277 agents tested against 559 isolates of  $\beta$ -lactamase-positive *Enterobacteriaceae* (n=403) and *P.*  
 278 *aeruginosa* (n=156) collected as part of the INFORM global surveillance program in 2012–2015.

| Organism/Genotype (no. of isolates) <sup>a</sup> | Antimicrobial agent           | MIC ( $\mu\text{g/ml}$ ) <sup>b</sup> |                   |                   | % Susceptible <sup>c</sup> |
|--------------------------------------------------|-------------------------------|---------------------------------------|-------------------|-------------------|----------------------------|
|                                                  |                               | MIC <sub>50</sub>                     | MIC <sub>90</sub> | Range             |                            |
| <i>Enterobacteriaceae</i> (403)                  |                               |                                       |                   |                   |                            |
| OSBL-positive (10)                               |                               |                                       |                   |                   |                            |
|                                                  | Ceftazidime-avibactam         | 0.25                                  | 1                 | 0.03–1            | 100                        |
|                                                  | Ceftazidime                   | 1                                     | 32                | $\leq 0.015$ –64  | 60.0                       |
|                                                  | Cefepime                      | 0.25                                  | 16                | $\leq 0.12$ –16   | 80.0                       |
|                                                  | Aztreonam                     | 1                                     | 64                | $\leq 0.015$ –128 | 70.0                       |
|                                                  | Piperacillin-tazobactam       | 16                                    | >128              | $\leq 0.25$ –>128 | 80.0                       |
|                                                  | Doripenem                     | 0.06                                  | 0.5               | 0.03–2            | 90.0                       |
|                                                  | Imipenem                      | 0.25                                  | 8                 | 0.06–8            | 70.0                       |
|                                                  | Meropenem                     | 0.06                                  | 0.12              | 0.03–0.5          | 100                        |
|                                                  | Amikacin                      | 2                                     | 16                | $\leq 0.25$ –>32  | 90.0                       |
|                                                  | Colistin (n=2) <sup>d</sup>   | — <sup>b</sup>                        | —                 | 0.5–>4            | 50.0                       |
|                                                  | Tigecycline                   | 0.5                                   | 2                 | 0.5–4             | 90.0                       |
|                                                  | Levofloxacin                  | >4                                    | >4                | 0.06–>4           | 40.0                       |
| Spectrum undefined-positive (1) <sup>e</sup>     |                               |                                       |                   |                   |                            |
|                                                  | Ceftazidime-avibactam         | — <sup>b</sup>                        | —                 | 0.12              | 100                        |
|                                                  | Ceftazidime                   | —                                     | —                 | 32                | 0                          |
|                                                  | Cefepime                      | —                                     | —                 | $\leq 0.12$       | 100                        |
|                                                  | Aztreonam                     | —                                     | —                 | 4                 | 100                        |
|                                                  | Piperacillin-tazobactam       | —                                     | —                 | 64                | 0                          |
|                                                  | Doripenem                     | —                                     | —                 | 0.06              | 100                        |
|                                                  | Imipenem                      | —                                     | —                 | 0.25              | 100                        |
|                                                  | Meropenem                     | —                                     | —                 | 0.06              | 100                        |
|                                                  | Amikacin                      | —                                     | —                 | 1                 | 100                        |
|                                                  | Colistin (n=0) <sup>d</sup>   | —                                     | —                 | ND <sup>d</sup>   | ND                         |
|                                                  | Tigecycline                   | —                                     | —                 | 2                 | 100                        |
|                                                  | Levofloxacin                  | —                                     | —                 | 0.5               | 100                        |
| ESBL-positive (360) <sup>f</sup>                 |                               |                                       |                   |                   |                            |
|                                                  | Ceftazidime-avibactam         | 0.5                                   | 2                 | $\leq 0.015$ –8   | 100                        |
|                                                  | Ceftazidime                   | 64                                    | >128              | 0.25–>128         | 18.3                       |
|                                                  | Cefepime                      | >16                                   | >16               | 0.5–>16           | 5.6                        |
|                                                  | Aztreonam                     | 128                                   | >128              | 0.25–>128         | 5.6                        |
|                                                  | Piperacillin-tazobactam       | 32                                    | >128              | $\leq 0.25$ –>128 | 48.6                       |
|                                                  | Doripenem                     | 0.06                                  | 2                 | $\leq 0.008$ –>4  | 88.6                       |
|                                                  | Imipenem                      | 0.25                                  | 1                 | 0.06–8            | 92.8                       |
|                                                  | Meropenem                     | 0.06                                  | 2                 | $\leq 0.004$ –8   | 80.0                       |
|                                                  | Amikacin                      | 4                                     | >32               | 0.5–>32           | 82.2                       |
|                                                  | Colistin (n=213) <sup>d</sup> | 1                                     | >4                | 0.25–>4           | 85.4                       |
|                                                  | Tigecycline                   | 0.5                                   | 2                 | 0.06–>8           | 92.8                       |
|                                                  | Levofloxacin                  | >4                                    | >4                | $\leq 0.03$ –>4   | 28.9                       |
| AmpC-positive (16) <sup>g</sup>                  |                               |                                       |                   |                   |                            |
|                                                  | Ceftazidime-avibactam         | 0.25                                  | 1                 | 0.03–1            | 100                        |
|                                                  | Ceftazidime                   | 1                                     | >128              | 0.25–>128         | 50.0                       |
|                                                  | Cefepime                      | 0.5                                   | 8                 | $\leq 0.12$ –8    | 75.0                       |
|                                                  | Aztreonam                     | 2                                     | 128               | 0.06–128          | 50.0                       |
|                                                  | Piperacillin-tazobactam       | 8                                     | >128              | 0.5–>128          | 56.3                       |
|                                                  | Doripenem                     | 0.12                                  | 1                 | 0.03–4            | 93.8                       |
|                                                  | Imipenem                      | 2                                     | 4                 | 0.25–8            | 37.5                       |
|                                                  | Meropenem                     | 0.12                                  | 0.5               | 0.03–4            | 93.8                       |
|                                                  | Amikacin                      | 2                                     | 8                 | 1–>32             | 93.8                       |
|                                                  | Colistin (n=8) <sup>d</sup>   | — <sup>b</sup>                        | —                 | 0.25–>4           | 87.5                       |
|                                                  | Tigecycline                   | 0.5                                   | 2                 | 0.12–2            | 100                        |
|                                                  | Levofloxacin                  | 0.06                                  | >4                | $\leq 0.03$ –>4   | 87.5                       |
| ESBL-positive + AmpC-positive (15) <sup>h</sup>  |                               |                                       |                   |                   |                            |
|                                                  | Ceftazidime-avibactam         | 0.5                                   | 2                 | 0.03–2            | 100                        |
|                                                  | Ceftazidime                   | 64                                    | >128              | 2–>128            | 6.7                        |
|                                                  | Cefepime                      | 16                                    | >16               | $\leq 0.12$ –>16  | 20.0                       |
|                                                  | Aztreonam                     | 128                                   | >128              | 8–>128            | 0                          |

| Organism/Genotype (no. of isolates) <sup>a</sup>             | Antimicrobial agent               | MIC ( $\mu\text{g/ml}$ ) <sup>b</sup> |                   |                 | % Susceptible <sup>c</sup> |
|--------------------------------------------------------------|-----------------------------------|---------------------------------------|-------------------|-----------------|----------------------------|
|                                                              |                                   | MIC <sub>50</sub>                     | MIC <sub>90</sub> | Range           |                            |
|                                                              | Piperacillin-tazobactam           | 32                                    | >128              | 2->128          | 46.7                       |
|                                                              | Doripenem                         | 0.12                                  | 0.5               | 0.03-0.5        | 100                        |
|                                                              | Imipenem                          | 1                                     | 2                 | 0.25-2          | 73.3                       |
|                                                              | Meropenem                         | 0.12                                  | 0.5               | 0.03-0.5        | 100                        |
|                                                              | Amikacin                          | 8                                     | 32                | 1->32           | 80.0                       |
|                                                              | Colistin (n=5) <sup>d</sup>       | — <sup>b</sup>                        | —                 | 0.25-1          | 100                        |
|                                                              | Tigecycline                       | 1                                     | 2                 | 0.12-4          | 93.3                       |
|                                                              | Levofloxacin                      | >4                                    | >4                | 0.06->4         | 26.7                       |
| KPC-positive (1) <sup>i</sup>                                | Ceftazidime-avibactam             | — <sup>b</sup>                        | —                 | 1               | 100                        |
|                                                              | Ceftazidime                       | —                                     | —                 | 128             | 0                          |
|                                                              | Cefepime                          | —                                     | —                 | >16             | 0                          |
|                                                              | Aztreonam                         | —                                     | —                 | >128            | 0                          |
|                                                              | Piperacillin-tazobactam           | —                                     | —                 | >128            | 0                          |
|                                                              | Doripenem                         | —                                     | —                 | 4               | 0                          |
|                                                              | Imipenem                          | —                                     | —                 | 8               | 0                          |
|                                                              | Meropenem                         | —                                     | —                 | 8               | 0                          |
|                                                              | Amikacin                          | —                                     | —                 | 32              | 0                          |
|                                                              | Colistin (n=0) <sup>d</sup>       | —                                     | —                 | ND <sup>d</sup> | ND                         |
|                                                              | Tigecycline                       | —                                     | —                 | 2               | 100                        |
|                                                              | Levofloxacin                      | —                                     | —                 | >4              | 0                          |
| <i>P. aeruginosa</i> (156)<br>OSBL-positive (3) <sup>j</sup> | Ceftazidime-avibactam             | — <sup>b</sup>                        | —                 | 4-16            | 66.7                       |
|                                                              | Ceftazidime                       | —                                     | —                 | 8-64            | 33.3                       |
|                                                              | Cefepime                          | —                                     | —                 | 16->16          | 0                          |
|                                                              | Aztreonam                         | —                                     | —                 | 16-64           | 0                          |
|                                                              | Piperacillin-tazobactam           | —                                     | —                 | 64->128         | 0                          |
|                                                              | Doripenem                         | —                                     | —                 | 1->4            | 66.7                       |
|                                                              | Imipenem                          | —                                     | —                 | 2->8            | 33.3                       |
|                                                              | Meropenem                         | —                                     | —                 | 2->8            | 33.3                       |
|                                                              | Amikacin                          | —                                     | —                 | >32->32         | 0                          |
|                                                              | Colistin (n=1) <sup>d</sup>       | —                                     | —                 | 1               | 100                        |
|                                                              | Levofloxacin                      | —                                     | —                 | >4->4           | 0                          |
|                                                              | ESBL-positive (16) <sup>j,k</sup> | Ceftazidime-avibactam                 | 16                | 128             | 4->128                     |
| Ceftazidime                                                  |                                   | >128                                  | >128              | >128->128       | 0                          |
| Cefepime                                                     |                                   | >16                                   | >16               | 16->16          | 0                          |
| Aztreonam                                                    |                                   | >128                                  | >128              | >128->128       | 0                          |
| Piperacillin-tazobactam                                      |                                   | 32                                    | 64                | 8-128           | 37.5                       |
| Doripenem                                                    |                                   | 4                                     | >4                | 2->4            | 18.8                       |
| Imipenem                                                     |                                   | >8                                    | >8                | >8->8           | 0                          |
| Meropenem                                                    |                                   | 4                                     | >8                | 4->8            | 0                          |
| Amikacin                                                     |                                   | 32                                    | >32               | 16->32          | 31.3                       |
| Colistin (n=11) <sup>d</sup>                                 |                                   | 1                                     | 2                 | 1-4             | 90.9                       |
| Levofloxacin                                                 |                                   | 4                                     | >4                | 1->4            | 31.3                       |
| KPC-positive (24) <sup>j,l</sup>                             |                                   | Ceftazidime-avibactam                 | 8                 | 16              | 1-16                       |
|                                                              | Ceftazidime                       | 64                                    | 128               | 64-128          | 0                          |
|                                                              | Cefepime                          | >16                                   | >16               | >16->16         | 0                          |
|                                                              | Aztreonam                         | >128                                  | >128              | >128->128       | 0                          |
|                                                              | Piperacillin-tazobactam           | >128                                  | >128              | >128->128       | 0                          |
|                                                              | Doripenem                         | >4                                    | >4                | >4->4           | 0                          |
|                                                              | Imipenem                          | >8                                    | >8                | >8->8           | 0                          |
|                                                              | Meropenem                         | >8                                    | >8                | >8->8           | 0                          |
|                                                              | Amikacin                          | 8                                     | 16                | 1-32            | 95.8                       |
|                                                              | Colistin (n=15) <sup>d</sup>      | 2                                     | 4                 | 1-4             | 86.7                       |
|                                                              | Levofloxacin                      | >4                                    | >4                | >4->4           | 0                          |
|                                                              | MBL-positive (33) <sup>j,m</sup>  | Ceftazidime-avibactam                 | 32                | 64              | 4->128                     |
| Ceftazidime                                                  |                                   | 32                                    | 128               | 4->128          | 3.0                        |
| Cefepime                                                     |                                   | 16                                    | >16               | 8->16           | 18.2                       |
| Aztreonam                                                    |                                   | 16                                    | >128              | 2->128          | 18.2                       |

| Organism/Genotype (no. of isolates) <sup>a</sup>   | Antimicrobial agent          | MIC (µg/ml) <sup>b</sup> |                   |          | % Susceptible <sup>c</sup> |
|----------------------------------------------------|------------------------------|--------------------------|-------------------|----------|----------------------------|
|                                                    |                              | MIC <sub>50</sub>        | MIC <sub>90</sub> | Range    |                            |
|                                                    | Piperacillin-tazobactam      | 64                       | >128              | 16->128  | 3.0                        |
|                                                    | Doripenem                    | >4                       | >4                | 1->4     | 9.1                        |
|                                                    | Imipenem                     | >8                       | >8                | >8->8    | 0                          |
|                                                    | Meropenem                    | >8                       | >8                | 1->8     | 9.1                        |
|                                                    | Amikacin                     | >32                      | >32               | 4->32    | 18.2                       |
|                                                    | Colistin (n=30) <sup>d</sup> | 2                        | 2                 | 1-4      | 90.0                       |
|                                                    | Levofloxacin                 | >4                       | >4                | 0.5->4   | 18.2                       |
| No acquired β-lactamase detected (80) <sup>j</sup> | Ceftazidime-avibactam        | 4                        | 8                 | 0.5->128 | 91.3                       |
|                                                    | Ceftazidime                  | 8                        | 64                | 1->128   | 51.3                       |
|                                                    | Cefepime                     | 8                        | >16               | 1->16    | 57.5                       |
|                                                    | Aztreonam                    | 32                       | 128               | 2->128   | 31.3                       |
|                                                    | Piperacillin-tazobactam      | 64                       | >128              | 2->128   | 41.3                       |
|                                                    | Doripenem                    | 4                        | >4                | 0.25->4  | 27.5                       |
|                                                    | Imipenem                     | >8                       | >8                | 1->8     | 1.3                        |
|                                                    | Meropenem                    | 8                        | >8                | 0.5->8   | 25.0                       |
|                                                    | Amikacin                     | 8                        | 32                | 1->32    | 86.3                       |
|                                                    | Colistin (n=60) <sup>d</sup> | 2                        | 2                 | 0.5-4    | 96.7                       |
|                                                    | Levofloxacin                 | 4                        | >4                | 0.12->4  | 47.5                       |

279 <sup>a</sup> OSBL, original-spectrum β-lactamase (e.g. TEM-1, SHV-1, SHV-11); ESBL, extended-spectrum β-lactamase;  
280 MBL, metallo-β-lactamase.

281 <sup>b</sup> —, MIC<sub>50</sub> and MIC<sub>90</sub> were not calculated for n <10 isolates.

282 <sup>c</sup> % Susceptibility was determined according to CLSI 2016 breakpoints with the exception of ceftazidime-avibactam  
283 and tigecycline where US FDA breakpoints were applied and colistin where EUCAST breakpoints were applied.

284 <sup>d</sup> Values are for colistin tested without 0.002% polysorbate-80; isolates collected in 2014-2015 only. ND, not  
285 determined; MIC range and % susceptible were not determined for n=0 isolates.

286 <sup>e</sup> Spectrum undefined, SHV-type and/or TEM-type β-lactamase with undefined spectrum of activity; isolate carrying  
287 SHV-36.

288 <sup>f</sup> Included isolates carrying CTX-M-1; CTX-M-2; CTX-M-3; CTX-M-14; CTX-M-15; CTX-M-29; CTX-M-30;  
289 CTX-M-32; CTX-M-55; CTX-M-104; CTX-M-116; CTX-M-136; CTX-M-165; CTX-M-3 and CTX-M-2; CTX-M-  
290 14 and CTX-M-2; CTX-M-15 and CTX-M-2; CTX-M-15 and CTX-M-13; CTX-M-15 and CTX-M-14; CTX-M-30  
291 and CTX-M-2; CTX-M-30 and CTX-M-75; CTX-M-2 and SHV-2; CTX-M-2 and SHV-5; CTX-M-2 and SHV-12;  
292 CTX-M-2 and SHV-31; CTX-M-3 and SHV-5; CTX-M-3 and SHV-12; CTX-M-15 and SHV-12; CTX-M-15 and  
293 SHV-32; CTX-M-15 and SHV-55; CTX-M-15 and PER-1; CTX-M-15 and CTX-M-2 and SHV-12; SHV-5; SHV-  
294 12; SHV-55; and the chromosomal ESBL common to *K. oxytoca*, with or without a SHV-OSBL and/or TEM-  
295 OSBL.

296 <sup>g</sup> Included isolates carrying CMY-2, DHA-1, and/or the chromosomal AmpCs common to *Citrobacter* spp.,  
297 *Enterobacter* spp., and *Serratia* spp.

298 <sup>h</sup> Included isolates carrying CTX-M-15 and CMY-2; SHV-12 and DHA-1; SHV-12 and DHA-6; and the  
299 chromosomal AmpCs common to *Citrobacter* spp. and *Enterobacter* spp. with CTX-M-1; CTX-M-3; SHV-5; SHV-  
300 12; CTX-M-30; CTX-M-3 and SHV-12 and DHA-1; CTX-M-30 and SHV-12 and DHA-1; with or without a TEM-  
301 OSBL.

302 <sup>i</sup> Isolate co-carrying KPC-2, a SHV-OSBL and a TEM-OSBL.

303 <sup>j</sup> Assumed to carry the chromosomal AmpC common to *P. aeruginosa*.

- 304 <sup>k</sup>Included isolates carrying PER-1 or PER-3.
- 305 <sup>l</sup>Isolates carrying KPC-2.
- 306 <sup>m</sup>Isolates carrying VIM-2, or VIM-2 and KPC-2.

307 **Table S5A.** Colombia - *In vitro* activities of ceftazidime-avibactam and comparator  
 308 antimicrobial agents tested against 1,172 isolates of *Enterobacteriaceae* and *P. aeruginosa*  
 309 collected as part of the INFORM global surveillance program in 2012-2015.  
 310

| Organism, phenotype (no. of isolates) <sup>a</sup> | Antimicrobial agent                             | MIC (µg/ml) <sup>b</sup> |                   |             | % Susceptible <sup>c</sup> |      |
|----------------------------------------------------|-------------------------------------------------|--------------------------|-------------------|-------------|----------------------------|------|
|                                                    |                                                 | MIC <sub>50</sub>        | MIC <sub>90</sub> | Range       |                            |      |
| <i>Enterobacteriaceae</i>                          |                                                 |                          |                   |             |                            |      |
| All (972)                                          | Ceftazidime-avibactam                           | 0.12                     | 0.5               | ≤0.015->128 | 99.6                       |      |
|                                                    | Ceftazidime                                     | 0.25                     | 64                | ≤0.015->128 | 72.4                       |      |
|                                                    | Cefepime                                        | ≤0.12                    | >16               | ≤0.12->16   | 75.9                       |      |
|                                                    | Aztreonam                                       | 0.12                     | 64                | ≤0.015->128 | 70.7                       |      |
|                                                    | Piperacillin-tazobactam                         | 4                        | >128              | ≤0.25->128  | 79.8                       |      |
|                                                    | Doripenem                                       | 0.06                     | 0.5               | ≤0.008->4   | 92.9                       |      |
|                                                    | Imipenem                                        | 0.25                     | 4                 | 0.06->8     | 79.4                       |      |
|                                                    | Meropenem                                       | 0.03                     | 0.25              | 0.008->8    | 91.9                       |      |
|                                                    | Amikacin                                        | 2                        | 8                 | 0.5->32     | 95.8                       |      |
|                                                    | Colistin (n=541) <sup>d</sup>                   | 0.5                      | >4                | ≤0.12->4    | 84.1                       |      |
|                                                    | Tigecycline                                     | 0.5                      | 2                 | ≤0.015-8    | 94.4                       |      |
|                                                    | Levofloxacin                                    | 0.12                     | >4                | ≤0.03->4    | 76.5                       |      |
|                                                    | All, MBL-negative (968)                         | Ceftazidime-avibactam    | 0.12              | 0.5         | ≤0.015-8                   | 100  |
|                                                    |                                                 | Ceftazidime              | 0.25              | 64          | ≤0.015->128                | 72.7 |
| Cefepime                                           |                                                 | ≤0.12                    | >16               | ≤0.12->16   | 76.2                       |      |
| Aztreonam                                          |                                                 | 0.12                     | 64                | ≤0.015->128 | 70.9                       |      |
| Piperacillin-tazobactam                            |                                                 | 4                        | >128              | ≤0.25->128  | 80.2                       |      |
| Doripenem                                          |                                                 | 0.06                     | 0.5               | ≤0.008->4   | 93.3                       |      |
| Imipenem                                           |                                                 | 0.25                     | 4                 | 0.06->8     | 79.8                       |      |
| Meropenem                                          |                                                 | 0.03                     | 0.25              | 0.008->8    | 92.3                       |      |
| Amikacin                                           |                                                 | 2                        | 8                 | 0.5->32     | 95.8                       |      |
| Colistin (n=537) <sup>d</sup>                      |                                                 | 0.5                      | >4                | ≤0.12->4    | 84.2                       |      |
| Tigecycline                                        |                                                 | 0.5                      | 2                 | ≤0.015-8    | 94.6                       |      |
| Levofloxacin                                       |                                                 | 0.12                     | >4                | ≤0.03->4    | 76.6                       |      |
| Ceftazidime non-susceptible (268)                  |                                                 | Ceftazidime-avibactam    | 0.25              | 1           | 0.03->128                  | 98.5 |
|                                                    |                                                 | Ceftazidime              | 32                | >128        | 8->128                     | 0    |
|                                                    | Cefepime                                        | 16                       | >16               | ≤0.12->16   | 22.8                       |      |
|                                                    | Aztreonam                                       | 64                       | >128              | 0.06->128   | 8.2                        |      |
|                                                    | Piperacillin-tazobactam                         | 32                       | >128              | 0.5->128    | 48.1                       |      |
|                                                    | Doripenem                                       | 0.06                     | >4                | 0.015->4    | 76.9                       |      |
|                                                    | Imipenem                                        | 0.25                     | >8                | 0.06->8     | 70.5                       |      |
|                                                    | Meropenem                                       | 0.06                     | >8                | 0.015->8    | 75.0                       |      |
|                                                    | Amikacin                                        | 4                        | 32                | 0.5->32     | 86.6                       |      |
|                                                    | Colistin (n=145) <sup>d</sup>                   | 0.5                      | 2                 | 0.25->4     | 91.7                       |      |
|                                                    | Tigecycline                                     | 0.5                      | 2                 | ≤0.015-8    | 94.8                       |      |
|                                                    | Levofloxacin                                    | >4                       | >4                | ≤0.03->4    | 45.9                       |      |
|                                                    | Ceftazidime non-susceptible, MBL-negative (264) | Ceftazidime-avibactam    | 0.25              | 1           | 0.03-8                     | 100  |
|                                                    |                                                 | Ceftazidime              | 32                | >128        | 8->128                     | 0    |
| Cefepime                                           |                                                 | 16                       | >16               | ≤0.12->16   | 23.1                       |      |
| Aztreonam                                          |                                                 | 64                       | >128              | 0.25->128   | 8.0                        |      |
| Piperacillin-tazobactam                            |                                                 | 32                       | >128              | 0.5->128    | 48.9                       |      |
| Doripenem                                          |                                                 | 0.06                     | >4                | 0.015->4    | 78.0                       |      |
| Imipenem                                           |                                                 | 0.25                     | >8                | 0.06->8     | 71.6                       |      |
| Meropenem                                          |                                                 | 0.06                     | >8                | 0.015->8    | 76.1                       |      |
| Amikacin                                           |                                                 | 4                        | 32                | 0.5->32     | 86.4                       |      |
| Colistin (n=141) <sup>d</sup>                      |                                                 | 0.5                      | 2                 | 0.25->4     | 92.2                       |      |
| Tigecycline                                        |                                                 | 0.5                      | 2                 | ≤0.015-8    | 95.5                       |      |
| Levofloxacin                                       |                                                 | >4                       | >4                | ≤0.03->4    | 45.5                       |      |
| Meropenem non-susceptible (79)                     |                                                 | Ceftazidime-avibactam    | 0.5               | 4           | 0.06->128                  | 94.9 |
|                                                    |                                                 | Ceftazidime              | 32                | >128        | 1->128                     | 15.2 |
|                                                    | Cefepime                                        | 16                       | >16               | ≤0.12->16   | 17.7                       |      |

| Organism, phenotype (no. of isolates) <sup>a</sup> | Antimicrobial agent                     | MIC (µg/ml) <sup>b</sup> |                   |           | % Susceptible <sup>c</sup> |
|----------------------------------------------------|-----------------------------------------|--------------------------|-------------------|-----------|----------------------------|
|                                                    |                                         | MIC <sub>50</sub>        | MIC <sub>90</sub> | Range     |                            |
|                                                    | Aztreonam                               | 128                      | >128              | 0.06->128 | 1.3                        |
|                                                    | Piperacillin-tazobactam                 | >128                     | >128              | 32->128   | 0                          |
|                                                    | Doripenem                               | >4                       | >4                | 0.5->4    | 12.7                       |
|                                                    | Imipenem                                | 8                        | >8                | 2->8      | 0                          |
|                                                    | Meropenem                               | 8                        | >8                | 2->8      | 0                          |
|                                                    | Amikacin                                | 4                        | 32                | 0.5->32   | 74.7                       |
|                                                    | Colistin (n=52) <sup>d</sup>            | 0.5                      | 2                 | 0.25->4   | 90.4                       |
|                                                    | Tigecycline                             | 1                        | 2                 | 0.25-4    | 94.9                       |
|                                                    | Levofloxacin                            | 1                        | >4                | ≤0.03->4  | 54.4                       |
| Meropenem non-susceptible, MBL-negative (75)       | Ceftazidime-avibactam                   | 0.5                      | 2                 | 0.06-4    | 100                        |
|                                                    | Ceftazidime                             | 32                       | >128              | 1->128    | 16.0                       |
|                                                    | Cefepime                                | 16                       | >16               | ≤0.12->16 | 18.7                       |
|                                                    | Aztreonam                               | 128                      | >128              | 8->128    | 0                          |
|                                                    | Piperacillin-tazobactam                 | >128                     | >128              | 32->128   | 0                          |
|                                                    | Doripenem                               | >4                       | >4                | 0.5->4    | 13.3                       |
|                                                    | Imipenem                                | 8                        | >8                | 2->8      | 0                          |
|                                                    | Meropenem                               | 8                        | >8                | 2->8      | 0                          |
|                                                    | Amikacin                                | 4                        | 32                | 0.5->32   | 73.3                       |
|                                                    | Colistin (n=48) <sup>d</sup>            | 0.5                      | 2                 | 0.25->4   | 91.7                       |
|                                                    | Tigecycline                             | 0.5                      | 2                 | 0.25-4    | 97.3                       |
|                                                    | Levofloxacin                            | 1                        | >4                | ≤0.03->4  | 53.3                       |
|                                                    | Colistin-resistant (13) <sup>e,f</sup>  | Ceftazidime-avibactam    | 0.25              | 2         | 0.12-2                     |
| Ceftazidime                                        |                                         | 32                       | 128               | 0.12->128 | 46.2                       |
| Cefepime                                           |                                         | 0.5                      | >16               | ≤0.12->16 | 53.9                       |
| Aztreonam                                          |                                         | 8                        | >128              | 0.03->128 | 46.2                       |
| Piperacillin-tazobactam                            |                                         | 8                        | >128              | 1->128    | 53.9                       |
| Doripenem                                          |                                         | 0.06                     | >4                | 0.03->4   | 69.2                       |
| Imipenem                                           |                                         | 1                        | >8                | 0.12->8   | 53.9                       |
| Meropenem                                          |                                         | 0.06                     | >8                | 0.03->8   | 69.2                       |
| Amikacin                                           |                                         | 4                        | 32                | 1->32     | 84.6                       |
| Colistin (n=13) <sup>d</sup>                       |                                         | >4                       | >4                | 4->4      | 0                          |
| Tigecycline                                        |                                         | 1                        | 2                 | 0.12-4    | 92.3                       |
| Levofloxacin                                       |                                         | 1                        | >4                | 0.06->4   | 53.9                       |
| Multidrug-resistant (178)                          |                                         | Ceftazidime-avibactam    | 0.25              | 2         | 0.03->128                  |
|                                                    | Ceftazidime                             | 32                       | >128              | 0.12->128 | 6.7                        |
|                                                    | Cefepime                                | >16                      | >16               | 0.5->16   | 4.5                        |
|                                                    | Aztreonam                               | 64                       | >128              | 0.06->128 | 2.3                        |
|                                                    | Piperacillin-tazobactam                 | 128                      | >128              | 1->128    | 37.1                       |
|                                                    | Doripenem                               | 0.12                     | >4                | 0.015->4  | 65.2                       |
|                                                    | Imipenem                                | 0.5                      | >8                | 0.06->8   | 58.4                       |
|                                                    | Meropenem                               | 0.06                     | >8                | 0.015->8  | 61.8                       |
|                                                    | Amikacin                                | 8                        | 32                | 0.5->32   | 80.3                       |
|                                                    | Colistin (n=101) <sup>d</sup>           | 0.5                      | 2                 | 0.25->4   | 92.1                       |
|                                                    | Tigecycline                             | 0.5                      | 2                 | 0.06-8    | 92.7                       |
|                                                    | Levofloxacin                            | >4                       | >4                | ≤0.03->4  | 25.3                       |
|                                                    | Multidrug-resistant, MBL-negative (174) | Ceftazidime-avibactam    | 0.25              | 2         | 0.03-4                     |
| Ceftazidime                                        |                                         | 32                       | >128              | 0.12->128 | 6.9                        |
| Cefepime                                           |                                         | >16                      | >16               | 0.5->16   | 4.6                        |
| Aztreonam                                          |                                         | 64                       | >128              | 0.5->128  | 1.7                        |
| Piperacillin-tazobactam                            |                                         | 64                       | >128              | 1->128    | 37.9                       |
| Doripenem                                          |                                         | 0.12                     | >4                | 0.015->4  | 66.7                       |
| Imipenem                                           |                                         | 0.25                     | >8                | 0.06->8   | 59.8                       |
| Meropenem                                          |                                         | 0.06                     | >8                | 0.015->8  | 63.2                       |
| Amikacin                                           |                                         | 8                        | 32                | 0.5->32   | 79.9                       |
| Colistin (n=97) <sup>d</sup>                       |                                         | 0.5                      | 2                 | 0.25->4   | 92.8                       |
| Tigecycline                                        |                                         | 0.5                      | 2                 | 0.06-8    | 93.7                       |
| Levofloxacin                                       |                                         | >4                       | >4                | ≤0.03->4  | 24.1                       |
| <i>Escherichia coli</i><br>All (347) <sup>e</sup>  |                                         | Ceftazidime-avibactam    | 0.12              | 0.25      | ≤0.015-1                   |

| Organism, phenotype (no. of isolates) <sup>a</sup> | Antimicrobial agent                           | MIC (µg/ml) <sup>b</sup> |                   |             | % Susceptible <sup>c</sup> |      |
|----------------------------------------------------|-----------------------------------------------|--------------------------|-------------------|-------------|----------------------------|------|
|                                                    |                                               | MIC <sub>50</sub>        | MIC <sub>90</sub> | Range       |                            |      |
|                                                    | Ceftazidime                                   | 0.25                     | 32                | ≤0.015-→128 | 71.5                       |      |
|                                                    | Cefepime                                      | ≤0.12                    | >16               | ≤0.12-→16   | 74.1                       |      |
|                                                    | Aztreonam                                     | 0.12                     | 64                | ≤0.015-→128 | 69.7                       |      |
|                                                    | Piperacillin-tazobactam                       | 2                        | 32                | ≤0.25-→128  | 89.3                       |      |
|                                                    | Doripenem                                     | 0.03                     | 0.06              | 0.015-4     | 99.4                       |      |
|                                                    | Imipenem                                      | 0.12                     | 0.25              | 0.06-4      | 97.4                       |      |
|                                                    | Meropenem                                     | 0.03                     | 0.06              | 0.008-4     | 98.6                       |      |
|                                                    | Amikacin                                      | 4                        | 8                 | 1-→32       | 97.4                       |      |
|                                                    | Colistin (n=176) <sup>d</sup>                 | 0.5                      | 1                 | ≤0.12-4     | 98.3                       |      |
|                                                    | Tigecycline                                   | 0.25                     | 0.5               | 0.06-2      | 100                        |      |
|                                                    | Levofloxacin                                  | 0.5                      | >4                | ≤0.03-→4    | 59.4                       |      |
|                                                    | Ceftazidime non-susceptible (99) <sup>e</sup> | Ceftazidime-avibactam    | 0.25              | 0.25        | 0.03-1                     | 100  |
|                                                    |                                               | Ceftazidime              | 32                | 64          | 8-→128                     | 0    |
|                                                    |                                               | Cefepime                 | >16               | >16         | ≤0.12-→16                  | 21.2 |
| Aztreonam                                          |                                               | 64                       | 128               | 4-→128      | 7.1                        |      |
| Piperacillin-tazobactam                            |                                               | 8                        | 64                | 2-→128      | 77.8                       |      |
| Doripenem                                          |                                               | 0.06                     | 0.12              | 0.015-4     | 98.0                       |      |
| Imipenem                                           |                                               | 0.25                     | 0.5               | 0.06-4      | 92.9                       |      |
| Meropenem                                          |                                               | 0.03                     | 0.06              | 0.015-4     | 95.0                       |      |
| Amikacin                                           |                                               | 8                        | 16                | 2-→32       | 91.9                       |      |
| Colistin (n=44) <sup>d</sup>                       |                                               | 0.5                      | 1                 | 0.25-4      | 97.7                       |      |
| Tigecycline                                        |                                               | 0.25                     | 0.5               | 0.06-2      | 100                        |      |
| Levofloxacin                                       |                                               | >4                       | >4                | ≤0.03-→4    | 23.2                       |      |
| Meropenem non-susceptible (5) <sup>e</sup>         |                                               | Ceftazidime-avibactam    | — <sup>b</sup>    | —           | 0.12-0.25                  | 100  |
|                                                    | Ceftazidime                                   | —                        | —                 | 8-32        | 0                          |      |
|                                                    | Cefepime                                      | —                        | —                 | 4-→16       | 0                          |      |
|                                                    | Aztreonam                                     | —                        | —                 | 64-→128     | 0                          |      |
|                                                    | Piperacillin-tazobactam                       | —                        | —                 | 128-→128    | 0                          |      |
|                                                    | Doripenem                                     | —                        | —                 | 1-4         | 60.0                       |      |
|                                                    | Imipenem                                      | —                        | —                 | 2-4         | 0                          |      |
|                                                    | Meropenem                                     | —                        | —                 | 2-4         | 0                          |      |
|                                                    | Amikacin                                      | —                        | —                 | 4-→32       | 60.0                       |      |
|                                                    | Colistin (n=1) <sup>d</sup>                   | —                        | —                 | 0.25        | 100                        |      |
|                                                    | Tigecycline                                   | —                        | —                 | 0.25-0.5    | 100                        |      |
|                                                    | Levofloxacin                                  | —                        | —                 | 0.06-→4     | 60.0                       |      |
|                                                    | Colistin-resistant (3) <sup>e</sup>           | Ceftazidime-avibactam    | — <sup>b</sup>    | —           | 0.12-0.25                  | 100  |
| Ceftazidime                                        |                                               | —                        | —                 | 0.12-32     | 66.7                       |      |
| Cefepime                                           |                                               | —                        | —                 | ≤0.12-0.5   | 100                        |      |
| Aztreonam                                          |                                               | —                        | —                 | 0.06-4      | 100                        |      |
| Piperacillin-tazobactam                            |                                               | —                        | —                 | 2-8         | 100                        |      |
| Doripenem                                          |                                               | —                        | —                 | 0.03-0.06   | 100                        |      |
| Imipenem                                           |                                               | —                        | —                 | 0.12-0.25   | 100                        |      |
| Meropenem                                          |                                               | —                        | —                 | 0.03-0.06   | 100                        |      |
| Amikacin                                           |                                               | —                        | —                 | 2-8         | 100                        |      |
| Colistin (n=3) <sup>d</sup>                        |                                               | —                        | —                 | 4-4         | 0                          |      |
| Tigecycline                                        |                                               | —                        | —                 | 0.12-0.5    | 100                        |      |
| Levofloxacin                                       |                                               | —                        | —                 | 1-→4        | 33.3                       |      |
| Multidrug-resistant (73) <sup>e</sup>              |                                               | Ceftazidime-avibactam    | 0.25              | 0.5         | 0.03-1                     | 100  |
|                                                    | Ceftazidime                                   | 32                       | 64                | 2-→128      | 4.1                        |      |
|                                                    | Cefepime                                      | >16                      | >16               | 4-→16       | 0.0                        |      |
|                                                    | Aztreonam                                     | 64                       | 128               | 16-→128     | 0.0                        |      |
|                                                    | Piperacillin-tazobactam                       | 16                       | >128              | 2-→128      | 72.6                       |      |
|                                                    | Doripenem                                     | 0.06                     | 0.12              | 0.015-4     | 97.3                       |      |
|                                                    | Imipenem                                      | 0.25                     | 0.25              | 0.06-4      | 93.2                       |      |
|                                                    | Meropenem                                     | 0.03                     | 0.06              | 0.015-4     | 93.2                       |      |
|                                                    | Amikacin                                      | 8                        | 16                | 2-→32       | 90.4                       |      |
|                                                    | Colistin (n=33) <sup>d</sup>                  | 0.5                      | 1                 | 0.25-2      | 100                        |      |
|                                                    | Tigecycline                                   | 0.25                     | 0.5               | 0.06-2      | 100                        |      |
|                                                    | Levofloxacin                                  | >4                       | >4                | 0.06-→4     | 5.5                        |      |

| Organism, phenotype (no. of isolates) <sup>a</sup> | Antimicrobial agent                             | MIC (µg/ml) <sup>b</sup> |                   |             | % Susceptible <sup>c</sup> |      |
|----------------------------------------------------|-------------------------------------------------|--------------------------|-------------------|-------------|----------------------------|------|
|                                                    |                                                 | MIC <sub>50</sub>        | MIC <sub>90</sub> | Range       |                            |      |
| <i>Klebsiella pneumoniae</i>                       |                                                 |                          |                   |             |                            |      |
| All (284)                                          | Ceftazidime-avibactam                           | 0.12                     | 1                 | ≤0.015-→128 | 98.9                       |      |
|                                                    | Ceftazidime                                     | 1                        | 128               | ≤0.015-→128 | 62.3                       |      |
|                                                    | Cefepime                                        | 0.25                     | >16               | ≤0.12-→16   | 64.4                       |      |
|                                                    | Aztreonam                                       | 0.25                     | >128              | ≤0.015-→128 | 59.2                       |      |
|                                                    | Piperacillin-tazobactam                         | 8                        | >128              | ≤0.25-→128  | 63.0                       |      |
|                                                    | Doripenem                                       | 0.06                     | >4                | ≤0.008-→4   | 79.6                       |      |
|                                                    | Imipenem                                        | 0.25                     | >8                | 0.06-→8     | 76.8                       |      |
|                                                    | Meropenem                                       | 0.06                     | >8                | 0.015-→8    | 79.2                       |      |
|                                                    | Amikacin                                        | 1                        | 16                | 0.5-→32     | 94.4                       |      |
|                                                    | Colistin (n=170) <sup>d</sup>                   | 0.5                      | 1                 | 0.25-→4     | 96.5                       |      |
|                                                    | Tigecycline                                     | 0.5                      | 2                 | 0.06-8      | 96.5                       |      |
|                                                    | Levofloxacin                                    | 0.12                     | >4                | ≤0.03-→4    | 79.2                       |      |
|                                                    | All, MBL-negative (281)                         | Ceftazidime-avibactam    | 0.12              | 0.5         | ≤0.015-4                   | 100  |
|                                                    |                                                 | Ceftazidime              | 0.5               | 128         | ≤0.015-→128                | 63.0 |
| Cefepime                                           |                                                 | 0.25                     | >16               | ≤0.12-→16   | 65.1                       |      |
| Aztreonam                                          |                                                 | 0.25                     | >128              | ≤0.015-→128 | 59.8                       |      |
| Piperacillin-tazobactam                            |                                                 | 8                        | >128              | ≤0.25-→128  | 63.7                       |      |
| Doripenem                                          |                                                 | 0.06                     | >4                | ≤0.008-→4   | 80.4                       |      |
| Imipenem                                           |                                                 | 0.25                     | >8                | 0.06-→8     | 77.6                       |      |
| Meropenem                                          |                                                 | 0.06                     | >8                | 0.015-→8    | 80.1                       |      |
| Amikacin                                           |                                                 | 1                        | 16                | 0.5-→32     | 94.3                       |      |
| Colistin (n=167) <sup>d</sup>                      |                                                 | 0.5                      | 1                 | 0.25-→4     | 96.4                       |      |
| Tigecycline                                        |                                                 | 0.5                      | 2                 | 0.06-8      | 96.8                       |      |
| Levofloxacin                                       |                                                 | 0.12                     | >4                | ≤0.03-→4    | 79.4                       |      |
| Ceftazidime non-susceptible (107)                  |                                                 | Ceftazidime-avibactam    | 0.5               | 2           | 0.06-→128                  | 97.2 |
|                                                    |                                                 | Ceftazidime              | 32                | >128        | 8-→128                     | 0    |
|                                                    | Cefepime                                        | 16                       | >16               | 0.5-→16     | 12.2                       |      |
|                                                    | Aztreonam                                       | 64                       | >128              | 1-→128      | 4.7                        |      |
|                                                    | Piperacillin-tazobactam                         | >128                     | >128              | 2-→128      | 28.0                       |      |
|                                                    | Doripenem                                       | 0.5                      | >4                | 0.03-→4     | 51.4                       |      |
|                                                    | Imipenem                                        | 1                        | >8                | 0.12-→8     | 51.4                       |      |
|                                                    | Meropenem                                       | 0.25                     | >8                | 0.03-→8     | 51.4                       |      |
|                                                    | Amikacin                                        | 4                        | 32                | 0.5-→32     | 86.0                       |      |
|                                                    | Colistin (n=69) <sup>d</sup>                    | 0.5                      | 2                 | 0.25-→4     | 92.8                       |      |
|                                                    | Tigecycline                                     | 1                        | 2                 | 0.25-8      | 93.5                       |      |
|                                                    | Levofloxacin                                    | 2                        | >4                | 0.06-→4     | 52.3                       |      |
|                                                    | Ceftazidime non-susceptible, MBL-negative (104) | Ceftazidime-avibactam    | 0.5               | 2           | 0.06-4                     | 100  |
|                                                    |                                                 | Ceftazidime              | 32                | >128        | 8-→128                     | 0    |
| Cefepime                                           |                                                 | 16                       | >16               | 0.5-→16     | 12.5                       |      |
| Aztreonam                                          |                                                 | 64                       | >128              | 1-→128      | 4.8                        |      |
| Piperacillin-tazobactam                            |                                                 | >128                     | >128              | 2-→128      | 28.9                       |      |
| Doripenem                                          |                                                 | 0.12                     | >4                | 0.03-→4     | 52.9                       |      |
| Imipenem                                           |                                                 | 0.5                      | >8                | 0.12-→8     | 52.9                       |      |
| Meropenem                                          |                                                 | 0.12                     | >8                | 0.03-→8     | 52.9                       |      |
| Amikacin                                           |                                                 | 4                        | 32                | 0.5-→32     | 85.6                       |      |
| Colistin (n=66) <sup>d</sup>                       |                                                 | 0.5                      | 2                 | 0.25-→4     | 92.4                       |      |
| Tigecycline                                        |                                                 | 1                        | 2                 | 0.25-8      | 94.2                       |      |
| Levofloxacin                                       |                                                 | 2                        | >4                | 0.06-→4     | 51.9                       |      |
| Meropenem non-susceptible (59)                     |                                                 | Ceftazidime-avibactam    | 0.5               | 4           | 0.12-→128                  | 94.9 |
|                                                    |                                                 | Ceftazidime              | 64                | >128        | 1-→128                     | 11.9 |
|                                                    | Cefepime                                        | >16                      | >16               | ≤0.12-→16   | 15.3                       |      |
|                                                    | Aztreonam                                       | 128                      | >128              | 8-→128      | 0                          |      |
|                                                    | Piperacillin-tazobactam                         | >128                     | >128              | 32-→128     | 0                          |      |
|                                                    | Doripenem                                       | >4                       | >4                | 0.5-→4      | 1.7                        |      |
|                                                    | Imipenem                                        | >8                       | >8                | 4-→8        | 0                          |      |
|                                                    | Meropenem                                       | >8                       | >8                | 2-→8        | 0                          |      |
|                                                    | Amikacin                                        | 8                        | 32                | 0.5-→32     | 74.6                       |      |
|                                                    | Colistin (n=41) <sup>d</sup>                    | 0.5                      | 2                 | 0.25-→4     | 90.2                       |      |
|                                                    | Tigecycline                                     | 1                        | 2                 | 0.25-4      | 96.6                       |      |



| Organism, phenotype (no. of isolates) <sup>a</sup> | Antimicrobial agent          | MIC (µg/ml) <sup>b</sup> |                   |             | % Susceptible <sup>c</sup> |
|----------------------------------------------------|------------------------------|--------------------------|-------------------|-------------|----------------------------|
|                                                    |                              | MIC <sub>50</sub>        | MIC <sub>90</sub> | Range       |                            |
|                                                    | Levofloxacin                 | 4                        | >4                | 0.06->4     | 49.2                       |
| Meropenem non-susceptible, MBL-negative (56)       | Ceftazidime-avibactam        | 0.5                      | 2                 | 0.12-4      | 100                        |
|                                                    | Ceftazidime                  | 64                       | >128              | 1->128      | 12.5                       |
|                                                    | Cefepime                     | 16                       | >16               | ≤0.12->16   | 16.1                       |
|                                                    | Aztreonam                    | 128                      | >128              | 8->128      | 0                          |
|                                                    | Piperacillin-tazobactam      | >128                     | >128              | 32->128     | 0                          |
|                                                    | Doripenem                    | >4                       | >4                | 0.5->4      | 1.8                        |
|                                                    | Imipenem                     | >8                       | >8                | 4->8        | 0                          |
|                                                    | Meropenem                    | >8                       | >8                | 2->8        | 0                          |
|                                                    | Amikacin                     | 4                        | 32                | 0.5->32     | 73.2                       |
|                                                    | Colistin (n=38) <sup>d</sup> | 0.5                      | >4                | 0.25->4     | 89.5                       |
|                                                    | Tigecycline                  | 1                        | 2                 | 0.25-4      | 98.2                       |
|                                                    | Levofloxacin                 | 4                        | >4                | 0.06->4     | 48.2                       |
| Colistin-resistant (6) <sup>e</sup>                | Ceftazidime-avibactam        | — <sup>b</sup>           | —                 | 0.25-2      | 100                        |
|                                                    | Ceftazidime                  | —                        | —                 | 2->128      | 16.7                       |
|                                                    | Cefepime                     | —                        | —                 | 8->16       | 0.0                        |
|                                                    | Aztreonam                    | —                        | —                 | 8->128      | 0.0                        |
|                                                    | Piperacillin-tazobactam      | —                        | —                 | 8->128      | 16.7                       |
|                                                    | Doripenem                    | —                        | —                 | 0.06->4     | 33.3                       |
|                                                    | Imipenem                     | —                        | —                 | 0.12->8     | 33.3                       |
|                                                    | Meropenem                    | —                        | —                 | 0.03->8     | 33.3                       |
|                                                    | Amikacin                     | —                        | —                 | 4->32       | 66.7                       |
|                                                    | Colistin (n=6) <sup>d</sup>  | —                        | —                 | >4->4       | 0.0                        |
|                                                    | Tigecycline                  | —                        | —                 | 1-4         | 83.3                       |
|                                                    | Levofloxacin                 | —                        | —                 | 0.06->4     | 33.3                       |
| Multidrug-resistant (74)                           | Ceftazidime-avibactam        | 0.5                      | 2                 | 0.06->128   | 96.0                       |
|                                                    | Ceftazidime                  | 64                       | >128              | 1->128      | 5.4                        |
|                                                    | Cefepime                     | >16                      | >16               | 2->16       | 6.8                        |
|                                                    | Aztreonam                    | 128                      | >128              | 16->128     | 0.0                        |
|                                                    | Piperacillin-tazobactam      | >128                     | >128              | 16->128     | 9.5                        |
|                                                    | Doripenem                    | 4                        | >4                | 0.03->4     | 29.7                       |
|                                                    | Imipenem                     | 8                        | >8                | 0.12->8     | 29.7                       |
|                                                    | Meropenem                    | 8                        | >8                | 0.03->8     | 29.7                       |
|                                                    | Amikacin                     | 4                        | 32                | 0.5->32     | 78.4                       |
|                                                    | Colistin (n=52) <sup>d</sup> | 0.5                      | 2                 | 0.25->4     | 90.4                       |
|                                                    | Tigecycline                  | 1                        | 2                 | 0.25-8      | 90.5                       |
|                                                    | Levofloxacin                 | >4                       | >4                | 0.06->4     | 36.5                       |
| Multidrug-resistant, MBL-negative (71)             | Ceftazidime-avibactam        | 0.5                      | 2                 | 0.06-4      | 100                        |
|                                                    | Ceftazidime                  | 64                       | >128              | 1->128      | 5.6                        |
|                                                    | Cefepime                     | >16                      | >16               | 2->16       | 7.0                        |
|                                                    | Aztreonam                    | 128                      | >128              | 16->128     | 0.0                        |
|                                                    | Piperacillin-tazobactam      | >128                     | >128              | 16->128     | 9.9                        |
|                                                    | Doripenem                    | 4                        | >4                | 0.03->4     | 31.0                       |
|                                                    | Imipenem                     | 8                        | >8                | 0.12->8     | 31.0                       |
|                                                    | Meropenem                    | 8                        | >8                | 0.03->8     | 31.0                       |
|                                                    | Amikacin                     | 4                        | 32                | 0.5->32     | 77.5                       |
|                                                    | Colistin (n=49) <sup>d</sup> | 0.5                      | >4                | 0.25->4     | 89.8                       |
|                                                    | Tigecycline                  | 1                        | 2                 | 0.25-8      | 91.6                       |
|                                                    | Levofloxacin                 | >4                       | >4                | 0.06->4     | 35.2                       |
| <i>Klebsiella oxytoca</i> <sup>g</sup>             |                              |                          |                   |             |                            |
| All (40) <sup>e</sup>                              | Ceftazidime-avibactam        | 0.12                     | 0.25              | ≤0.015-1    | 100                        |
|                                                    | Ceftazidime                  | 0.12                     | 2                 | 0.03-8      | 97.5                       |
|                                                    | Cefepime                     | ≤0.12                    | 2                 | ≤0.12-16    | 92.5                       |
|                                                    | Aztreonam                    | 0.12                     | 32                | ≤0.015->128 | 82.5                       |
|                                                    | Piperacillin-tazobactam      | 2                        | >128              | ≤0.25->128  | 75.0                       |
|                                                    | Doripenem                    | 0.06                     | 0.12              | 0.03-2      | 97.5                       |
|                                                    | Imipenem                     | 0.25                     | 4                 | 0.12->8     | 87.5                       |
|                                                    | Meropenem                    | 0.03                     | 0.25              | 0.015-4     | 92.5                       |
|                                                    | Amikacin                     | 1                        | 4                 | 0.5-16      | 100                        |

| Organism, phenotype (no. of isolates) <sup>a</sup> | Antimicrobial agent                           | MIC (µg/ml) <sup>b</sup> |                   |             | % Susceptible <sup>c</sup> |
|----------------------------------------------------|-----------------------------------------------|--------------------------|-------------------|-------------|----------------------------|
|                                                    |                                               | MIC <sub>50</sub>        | MIC <sub>90</sub> | Range       |                            |
|                                                    | Colistin (n=28) <sup>d</sup>                  | 0.5                      | 1                 | 0.25–1      | 100                        |
|                                                    | Tigecycline                                   | 0.25                     | 0.5               | 0.06–4      | 97.5                       |
|                                                    | Levofloxacin                                  | 0.06                     | 0.12              | ≤0.03–1     | 100                        |
| Ceftazidime non-susceptible (1) <sup>e</sup>       | Ceftazidime-avibactam                         | — <sup>b</sup>           | —                 | 0.5         | 100                        |
|                                                    | Ceftazidime                                   | —                        | —                 | 8           | 0                          |
|                                                    | Cefepime                                      | —                        | —                 | 16          | 0                          |
|                                                    | Aztreonam                                     | —                        | —                 | 64          | 0                          |
|                                                    | Piperacillin-tazobactam                       | —                        | —                 | 128         | 0                          |
|                                                    | Doripenem                                     | —                        | —                 | 1           | 100                        |
|                                                    | Imipenem                                      | —                        | —                 | 4           | 0                          |
|                                                    | Meropenem                                     | —                        | —                 | 1           | 100                        |
|                                                    | Amikacin                                      | —                        | —                 | 16          | 100                        |
|                                                    | Colistin (n=1) <sup>d</sup>                   | —                        | —                 | 0.5         | 100                        |
|                                                    | Tigecycline                                   | —                        | —                 | 0.25        | 100                        |
|                                                    | Levofloxacin                                  | —                        | —                 | 1           | 100                        |
|                                                    | Meropenem non-susceptible (3) <sup>e</sup>    | Ceftazidime-avibactam    | — <sup>b</sup>    | —           | 0.06–0.25                  |
| Ceftazidime                                        |                                               | —                        | —                 | 2–4         | 100                        |
| Cefepime                                           |                                               | —                        | —                 | 1–4         | 66.7                       |
| Aztreonam                                          |                                               | —                        | —                 | 16–32       | 0                          |
| Piperacillin-tazobactam                            |                                               | —                        | —                 | 128–128     | 0                          |
| Doripenem                                          |                                               | —                        | —                 | 1–2         | 66.7                       |
| Imipenem                                           |                                               | —                        | —                 | 4–4         | 0                          |
| Meropenem                                          |                                               | —                        | —                 | 2–4         | 0                          |
| Amikacin                                           |                                               | —                        | —                 | 1–4         | 100                        |
| Colistin (n=3) <sup>d</sup>                        |                                               | —                        | —                 | 0.25–0.5    | 100                        |
| Tigecycline                                        |                                               | —                        | —                 | 0.25–0.5    | 100                        |
| Levofloxacin                                       |                                               | —                        | —                 | 0.06–0.5    | 100                        |
| Multidrug-resistant (2) <sup>e</sup>               |                                               | Ceftazidime-avibactam    | — <sup>b</sup>    | —           | 0.06–0.5                   |
|                                                    | Ceftazidime                                   | —                        | —                 | 2–8         | 50.0                       |
|                                                    | Cefepime                                      | —                        | —                 | 1–16        | 50.0                       |
|                                                    | Aztreonam                                     | —                        | —                 | 16–64       | 0.0                        |
|                                                    | Piperacillin-tazobactam                       | —                        | —                 | 128–128     | 0.0                        |
|                                                    | Doripenem                                     | —                        | —                 | 1–1         | 100                        |
|                                                    | Imipenem                                      | —                        | —                 | 4–4         | 0.0                        |
|                                                    | Meropenem                                     | —                        | —                 | 1–4         | 50.0                       |
|                                                    | Amikacin                                      | —                        | —                 | 4–16        | 100                        |
|                                                    | Colistin (n=2) <sup>d</sup>                   | —                        | —                 | 0.5–0.5     | 100                        |
|                                                    | Tigecycline                                   | —                        | —                 | 0.25–0.25   | 100                        |
|                                                    | Levofloxacin                                  | —                        | —                 | 0.5–1       | 100                        |
|                                                    | <i>Enterobacter</i> spp.                      |                          |                   |             |                            |
| All (102) <sup>e,h</sup>                           | Ceftazidime-avibactam                         | 0.25                     | 1                 | 0.03–4      | 100                        |
|                                                    | Ceftazidime                                   | 0.5                      | 128               | 0.03–>128   | 65.7                       |
|                                                    | Cefepime                                      | ≤0.12                    | >16               | ≤0.12–>16   | 80.4                       |
|                                                    | Aztreonam                                     | 0.12                     | 64                | ≤0.015–>128 | 66.7                       |
|                                                    | Piperacillin-tazobactam                       | 4                        | >128              | 1–>128      | 74.5                       |
|                                                    | Doripenem                                     | 0.06                     | 0.25              | 0.015–>4    | 97.1                       |
|                                                    | Imipenem                                      | 1                        | 2                 | 0.12–>8     | 83.3                       |
|                                                    | Meropenem                                     | 0.06                     | 0.25              | 0.015–>8    | 96.1                       |
|                                                    | Amikacin                                      | 1                        | 4                 | 0.5–>32     | 92.2                       |
|                                                    | Colistin (n=62) <sup>d</sup>                  | 0.5                      | 1                 | ≤0.12–>4    | 93.6                       |
|                                                    | Tigecycline                                   | 0.5                      | 2                 | 0.25–2      | 100                        |
|                                                    | Levofloxacin                                  | 0.06                     | 1                 | ≤0.03–>4    | 90.2                       |
|                                                    | Ceftazidime non-susceptible (35) <sup>e</sup> | Ceftazidime-avibactam    | 0.5               | 2           | 0.06–4                     |
| Ceftazidime                                        |                                               | 64                       | >128              | 8–>128      | 0                          |
| Cefepime                                           |                                               | 8                        | >16               | ≤0.12–>16   | 42.9                       |
| Aztreonam                                          |                                               | 64                       | 128               | 1–>128      | 5.7                        |
| Piperacillin-tazobactam                            |                                               | 64                       | >128              | 1–>128      | 25.7                       |
| Doripenem                                          |                                               | 0.12                     | 1                 | 0.06–>4     | 91.4                       |
| Imipenem                                           |                                               | 0.5                      | 4                 | 0.25–>8     | 82.9                       |

| Organism, phenotype (no. of isolates) <sup>a</sup> | Antimicrobial agent          | MIC (µg/ml) <sup>b</sup> |                   |             | % Susceptible <sup>c</sup> |
|----------------------------------------------------|------------------------------|--------------------------|-------------------|-------------|----------------------------|
|                                                    |                              | MIC <sub>50</sub>        | MIC <sub>90</sub> | Range       |                            |
|                                                    | Meropenem                    | 0.12                     | 2                 | 0.03->8     | 88.6                       |
|                                                    | Amikacin                     | 2                        | 32                | 0.5->32     | 77.1                       |
|                                                    | Colistin (n=18) <sup>d</sup> | 0.5                      | 2                 | 0.25->4     | 94.4                       |
|                                                    | Tigecycline                  | 1                        | 2                 | 0.25-2      | 100                        |
|                                                    | Levofloxacin                 | 0.25                     | >4                | ≤0.03->4    | 71.4                       |
| Meropenem non-susceptible (4) <sup>e</sup>         | Ceftazidime-avibactam        | — <sup>b</sup>           | —                 | 0.12-2      | 100                        |
|                                                    | Ceftazidime                  | —                        | —                 | 8->128      | 0                          |
|                                                    | Cefepime                     | —                        | —                 | 2->16       | 25.0                       |
|                                                    | Aztreonam                    | —                        | —                 | 16->128     | 0                          |
|                                                    | Piperacillin-tazobactam      | —                        | —                 | 32->128     | 0                          |
|                                                    | Doripenem                    | —                        | —                 | 1->4        | 25.0                       |
|                                                    | Imipenem                     | —                        | —                 | 4->8        | 0                          |
|                                                    | Meropenem                    | —                        | —                 | 2->8        | 0                          |
|                                                    | Amikacin                     | —                        | —                 | 4-32        | 75.0                       |
|                                                    | Colistin (n=2) <sup>d</sup>  | —                        | —                 | 0.5-1       | 100                        |
|                                                    | Tigecycline                  | —                        | —                 | 0.25-2      | 100                        |
|                                                    | Levofloxacin                 | —                        | —                 | 0.12->4     | 75.0                       |
| Colistin-resistant (4) <sup>e</sup>                | Ceftazidime-avibactam        | — <sup>b</sup>           | —                 | 0.12-1      | 100                        |
|                                                    | Ceftazidime                  | —                        | —                 | 0.12-128    | 75.0                       |
|                                                    | Cefepime                     | —                        | —                 | ≤0.12-0.5   | 100                        |
|                                                    | Aztreonam                    | —                        | —                 | 0.03-64     | 75.0                       |
|                                                    | Piperacillin-tazobactam      | —                        | —                 | 1-128       | 75.0                       |
|                                                    | Doripenem                    | —                        | —                 | 0.03-0.12   | 100                        |
|                                                    | Imipenem                     | —                        | —                 | 1-2         | 50.0                       |
|                                                    | Meropenem                    | —                        | —                 | 0.06-0.25   | 100                        |
|                                                    | Amikacin                     | —                        | —                 | 1-2         | 100                        |
|                                                    | Colistin (n=4) <sup>d</sup>  | —                        | —                 | >4->4       | 0.0                        |
|                                                    | Tigecycline                  | —                        | —                 | 0.5-1       | 100                        |
|                                                    | Levofloxacin                 | —                        | —                 | 0.06-0.12   | 100                        |
| Multidrug-resistant (16) <sup>e</sup>              | Ceftazidime-avibactam        | 1                        | 4                 | 0.12-4      | 100                        |
|                                                    | Ceftazidime                  | 128                      | >128              | 8->128      | 0                          |
|                                                    | Cefepime                     | >16                      | >16               | 0.5->16     | 6.3                        |
|                                                    | Aztreonam                    | 64                       | >128              | 32->128     | 0                          |
|                                                    | Piperacillin-tazobactam      | >128                     | >128              | 4->128      | 12.5                       |
|                                                    | Doripenem                    | 0.25                     | >4                | 0.06->4     | 81.3                       |
|                                                    | Imipenem                     | 0.5                      | >8                | 0.25->8     | 68.8                       |
|                                                    | Meropenem                    | 0.12                     | >8                | 0.03->8     | 81.3                       |
|                                                    | Amikacin                     | 4                        | >32               | 1->32       | 50.0                       |
|                                                    | Colistin (n=7) <sup>d</sup>  | — <sup>b</sup>           | —                 | 0.5->4      | 85.7                       |
|                                                    | Tigecycline                  | 1                        | 2                 | 0.25-2      | 100                        |
|                                                    | Levofloxacin                 | >4                       | >4                | 0.12->4     | 43.8                       |
| <i>Citrobacter</i> spp. <sup>g</sup>               |                              |                          |                   |             |                            |
| All (52) <sup>e,i</sup>                            | Ceftazidime-avibactam        | 0.12                     | 0.5               | ≤0.015-2    | 100                        |
|                                                    | Ceftazidime                  | 0.5                      | 64                | ≤0.015->128 | 67.3                       |
|                                                    | Cefepime                     | ≤0.12                    | >16               | ≤0.12->16   | 76.9                       |
|                                                    | Aztreonam                    | 0.25                     | 64                | 0.03->128   | 57.7                       |
|                                                    | Piperacillin-tazobactam      | 4                        | 128               | 1->128      | 71.2                       |
|                                                    | Doripenem                    | 0.06                     | 1                 | 0.015->4    | 94.2                       |
|                                                    | Imipenem                     | 0.5                      | 2                 | 0.12->8     | 76.9                       |
|                                                    | Meropenem                    | 0.03                     | 2                 | 0.015->8    | 88.5                       |
|                                                    | Amikacin                     | 2                        | 4                 | 0.5->32     | 92.3                       |
|                                                    | Colistin (n=29) <sup>d</sup> | 0.5                      | 1                 | ≤0.12-1     | 100                        |
|                                                    | Tigecycline                  | 0.25                     | 1                 | 0.06-4      | 98.1                       |
|                                                    | Levofloxacin                 | 0.12                     | >4                | ≤0.03->4    | 82.7                       |
| Ceftazidime non-susceptible (17) <sup>e</sup>      | Ceftazidime-avibactam        | 0.25                     | 1                 | 0.12-1      | 100                        |
|                                                    | Ceftazidime                  | 32                       | 128               | 8->128      | 0                          |
|                                                    | Cefepime                     | >16                      | >16               | 0.25->16    | 35.3                       |
|                                                    | Aztreonam                    | 32                       | >128              | 16->128     | 0                          |
|                                                    | Piperacillin-tazobactam      | 32                       | >128              | 4->128      | 41.2                       |

| Organism, phenotype (no. of isolates) <sup>a</sup> | Antimicrobial agent          | MIC (µg/ml) <sup>b</sup> |                   |            | % Susceptible <sup>c</sup> |
|----------------------------------------------------|------------------------------|--------------------------|-------------------|------------|----------------------------|
|                                                    |                              | MIC <sub>50</sub>        | MIC <sub>90</sub> | Range      |                            |
|                                                    | Doripenem                    | 0.12                     | >4                | 0.03->4    | 82.4                       |
|                                                    | Imipenem                     | 1                        | >8                | 0.25->8    | 70.6                       |
|                                                    | Meropenem                    | 0.06                     | >8                | 0.03->8    | 76.5                       |
|                                                    | Amikacin                     | 2                        | >32               | 1->32      | 88.2                       |
|                                                    | Colistin (n=8) <sup>d</sup>  | — <sup>b</sup>           | —                 | 0.25-1     | 100                        |
|                                                    | Tigecycline                  | 0.5                      | 2                 | 0.25-4     | 94.1                       |
|                                                    | Levofloxacin                 | 0.5                      | >4                | ≤0.03->4   | 64.7                       |
| Meropenem non-susceptible (6) <sup>e</sup>         | Ceftazidime-avibactam        | — <sup>b</sup>           | —                 | 0.06-1     | 100                        |
|                                                    | Ceftazidime                  | —                        | —                 | 4-128      | 33.3                       |
|                                                    | Cefepime                     | —                        | —                 | 1->16      | 33.3                       |
|                                                    | Aztreonam                    | —                        | —                 | 16->128    | 0                          |
|                                                    | Piperacillin-tazobactam      | —                        | —                 | 64->128    | 0                          |
|                                                    | Doripenem                    | —                        | —                 | 1->4       | 50.0                       |
|                                                    | Imipenem                     | —                        | —                 | 2->8       | 0                          |
|                                                    | Meropenem                    | —                        | —                 | 2->8       | 0                          |
|                                                    | Amikacin                     | —                        | —                 | 1->32      | 66.7                       |
|                                                    | Colistin (n=4) <sup>d</sup>  | —                        | —                 | 0.25-1     | 100                        |
|                                                    | Tigecycline                  | —                        | —                 | 0.25-2     | 100                        |
|                                                    | Levofloxacin                 | —                        | —                 | ≤0.03->4   | 50.0                       |
| Multidrug-resistant (8) <sup>e</sup>               | Ceftazidime-avibactam        | — <sup>b</sup>           | —                 | 0.06-1     | 100                        |
|                                                    | Ceftazidime                  | —                        | —                 | 4->128     | 12.5                       |
|                                                    | Cefepime                     | —                        | —                 | 2->16      | 12.5                       |
|                                                    | Aztreonam                    | —                        | —                 | 16->128    | 0                          |
|                                                    | Piperacillin-tazobactam      | —                        | —                 | 4->128     | 12.5                       |
|                                                    | Doripenem                    | —                        | —                 | 0.12->4    | 62.5                       |
|                                                    | Imipenem                     | —                        | —                 | 0.5->8     | 37.5                       |
|                                                    | Meropenem                    | —                        | —                 | 0.06->8    | 37.5                       |
|                                                    | Amikacin                     | —                        | —                 | 1->32      | 62.5                       |
|                                                    | Colistin (n=5) <sup>d</sup>  | —                        | —                 | 0.25-1     | 100                        |
|                                                    | Tigecycline                  | —                        | —                 | 0.25-4     | 87.5                       |
|                                                    | Levofloxacin                 | —                        | —                 | ≤0.03->4   | 37.5                       |
| Proteaceae                                         |                              |                          |                   |            |                            |
| All (112) <sup>j</sup>                             | Ceftazidime-avibactam        | 0.06                     | 0.12              | ≤0.015-64  | 99.1                       |
|                                                    | Ceftazidime                  | 0.06                     | 2                 | 0.03-64    | 92.9                       |
|                                                    | Cefepime                     | ≤0.12                    | 0.5               | ≤0.12->16  | 93.8                       |
|                                                    | Aztreonam                    | ≤0.015                   | 0.5               | ≤0.015-4   | 100                        |
|                                                    | Piperacillin-tazobactam      | ≤0.25                    | 1                 | ≤0.25->128 | 98.2                       |
|                                                    | Doripenem                    | 0.25                     | 0.5               | 0.015->4   | 99.1                       |
|                                                    | Imipenem                     | 2                        | 4                 | 0.12->8    | 23.2                       |
|                                                    | Meropenem                    | 0.12                     | 0.25              | 0.03-8     | 99.1                       |
|                                                    | Amikacin                     | 4                        | 8                 | 0.5->32    | 96.4                       |
|                                                    | Colistin (n=55) <sup>d</sup> | >4                       | >4                | 2->4       | 1.8                        |
|                                                    | Tigecycline                  | 2                        | 4                 | ≤0.015-8   | 65.2                       |
|                                                    | Levofloxacin                 | 0.06                     | 2                 | ≤0.03->4   | 92.0                       |
| All, MBL-negative (111)                            | Ceftazidime-avibactam        | 0.06                     | 0.12              | ≤0.015-8   | 100                        |
|                                                    | Ceftazidime                  | 0.06                     | 0.5               | 0.03-32    | 93.7                       |
|                                                    | Cefepime                     | ≤0.12                    | 0.25              | ≤0.12->16  | 94.6                       |
|                                                    | Aztreonam                    | ≤0.015                   | 0.5               | ≤0.015-4   | 100                        |
|                                                    | Piperacillin-tazobactam      | ≤0.25                    | 1                 | ≤0.25-32   | 99.1                       |
|                                                    | Doripenem                    | 0.25                     | 0.5               | 0.015-1    | 100                        |
|                                                    | Imipenem                     | 2                        | 4                 | 0.12-8     | 23.4                       |
|                                                    | Meropenem                    | 0.12                     | 0.25              | 0.03-0.5   | 100                        |
|                                                    | Amikacin                     | 4                        | 8                 | 0.5->32    | 96.4                       |
|                                                    | Colistin (n=55) <sup>d</sup> | >4                       | >4                | 2->4       | 1.8                        |
|                                                    | Tigecycline                  | 2                        | 4                 | ≤0.015-8   | 65.8                       |
|                                                    | Levofloxacin                 | 0.06                     | 2                 | ≤0.03->4   | 91.9                       |
| Ceftazidime-non-susceptible (8)                    | Ceftazidime-avibactam        | — <sup>b</sup>           | —                 | 0.06-64    | 87.5                       |
|                                                    | Ceftazidime                  | —                        | —                 | 8-64       | 0                          |
|                                                    | Cefepime                     | —                        | —                 | ≤0.12->16  | 75.0                       |

| Organism, phenotype (no. of isolates) <sup>a</sup> | Antimicrobial agent                                                     | MIC (µg/ml) <sup>b</sup> |                   |           | % Susceptible <sup>c</sup> |
|----------------------------------------------------|-------------------------------------------------------------------------|--------------------------|-------------------|-----------|----------------------------|
|                                                    |                                                                         | MIC <sub>50</sub>        | MIC <sub>90</sub> | Range     |                            |
|                                                    | Aztreonam                                                               | —                        | —                 | 0.06–4    | 100                        |
|                                                    | Piperacillin-tazobactam                                                 | —                        | —                 | 0.5–>128  | 75.0                       |
|                                                    | Doripenem                                                               | —                        | —                 | 0.25–>4   | 87.5                       |
|                                                    | Imipenem                                                                | —                        | —                 | 1–>8      | 12.5                       |
|                                                    | Meropenem                                                               | —                        | —                 | 0.12–8    | 87.5                       |
|                                                    | Amikacin                                                                | —                        | —                 | 2–32      | 62.5                       |
|                                                    | Colistin (n=5) <sup>d</sup>                                             | —                        | —                 | >4–>4     | 0                          |
|                                                    | Tigecycline                                                             | —                        | —                 | ≤0.015–4  | 37.5                       |
|                                                    | Levofloxacin                                                            | —                        | —                 | 0.06–4    | 75.0                       |
|                                                    | Ceftazidime-non-susceptible, MBL negative (7)                           | Ceftazidime-avibactam    | — <sup>b</sup>    | —         | 0.06–8                     |
| Ceftazidime                                        |                                                                         | —                        | —                 | 8–32      | 0                          |
| Cefepime                                           |                                                                         | —                        | —                 | ≤0.12–>16 | 85.7                       |
| Aztreonam                                          |                                                                         | —                        | —                 | 0.25–4    | 100                        |
| Piperacillin-tazobactam                            |                                                                         | —                        | —                 | 0.5–32    | 85.7                       |
| Doripenem                                          |                                                                         | —                        | —                 | 0.25–0.5  | 100                        |
| Imipenem                                           |                                                                         | —                        | —                 | 1–4       | 14.3                       |
| Meropenem                                          |                                                                         | —                        | —                 | 0.12–0.25 | 100                        |
| Amikacin                                           |                                                                         | —                        | —                 | 2–32      | 57.1                       |
| Colistin (n=5) <sup>d</sup>                        |                                                                         | —                        | —                 | >4–>4     | 0                          |
| Tigecycline                                        |                                                                         | —                        | —                 | ≤0.015–4  | 42.9                       |
| Levofloxacin                                       |                                                                         | —                        | —                 | 0.06–4    | 71.4                       |
| Meropenem non-susceptible (1) <sup>k</sup>         |                                                                         | Ceftazidime-avibactam    | — <sup>b</sup>    | —         | 64                         |
|                                                    | Ceftazidime                                                             | —                        | —                 | 64        | 0                          |
|                                                    | Cefepime                                                                | —                        | —                 | 16        | 0                          |
|                                                    | Aztreonam                                                               | —                        | —                 | 0.06      | 100                        |
|                                                    | Piperacillin-tazobactam                                                 | —                        | —                 | >128      | 0                          |
|                                                    | Doripenem                                                               | —                        | —                 | >4        | 0                          |
|                                                    | Imipenem                                                                | —                        | —                 | >8        | 0                          |
|                                                    | Meropenem                                                               | —                        | —                 | 8         | 0                          |
|                                                    | Amikacin                                                                | —                        | —                 | 2         | 100                        |
|                                                    | Colistin (n=1) <sup>d</sup>                                             | —                        | —                 | >4        | 0                          |
|                                                    | Tigecycline                                                             | —                        | —                 | 4         | 0                          |
|                                                    | Levofloxacin                                                            | —                        | —                 | 2         | 100                        |
|                                                    | Multidrug-resistant (4)                                                 | Ceftazidime-avibactam    | — <sup>b</sup>    | —         | 0.03–64                    |
| Ceftazidime                                        |                                                                         | —                        | —                 | 0.12–64   | 75.0                       |
| Cefepime                                           |                                                                         | —                        | —                 | 16–>16    | 0                          |
| Aztreonam                                          |                                                                         | —                        | —                 | 0.06–2    | 100                        |
| Piperacillin-tazobactam                            |                                                                         | —                        | —                 | 1–>128    | 75.0                       |
| Doripenem                                          |                                                                         | —                        | —                 | 0.25–>4   | 75.0                       |
| Imipenem                                           |                                                                         | —                        | —                 | 2–>8      | 0.0                        |
| Meropenem                                          |                                                                         | —                        | —                 | 0.06–8    | 75.0                       |
| Amikacin                                           |                                                                         | —                        | —                 | 2–>32     | 75.0                       |
| Colistin (n=2) <sup>d</sup>                        |                                                                         | —                        | —                 | >4–>4     | 0                          |
| Tigecycline                                        |                                                                         | —                        | —                 | 4–8       | 0                          |
| Levofloxacin                                       |                                                                         | —                        | —                 | 2–>4      | 25.0                       |
| Multidrug-resistant, MBL-negative (3)              |                                                                         | Ceftazidime-avibactam    | — <sup>b</sup>    | —         | 0.03–0.06                  |
|                                                    | Ceftazidime                                                             | —                        | —                 | 0.12–2    | 100                        |
|                                                    | Cefepime                                                                | —                        | —                 | >16–>16   | 0                          |
|                                                    | Aztreonam                                                               | —                        | —                 | 0.5–2     | 100                        |
|                                                    | Piperacillin-tazobactam                                                 | —                        | —                 | 1–2       | 100                        |
|                                                    | Doripenem                                                               | —                        | —                 | 0.25–0.5  | 100                        |
|                                                    | Imipenem                                                                | —                        | —                 | 2–4       | 0                          |
|                                                    | Meropenem                                                               | —                        | —                 | 0.06–0.12 | 100                        |
|                                                    | Amikacin                                                                | —                        | —                 | 4–>32     | 66.7                       |
|                                                    | Colistin (n=1) <sup>d</sup>                                             | —                        | —                 | >4        | 0                          |
|                                                    | Tigecycline                                                             | —                        | —                 | 4–8       | 0                          |
|                                                    | Levofloxacin                                                            | —                        | —                 | >4–>4     | 0                          |
|                                                    | Other <i>Enterobacteriaceae</i> <sup>g</sup><br>All (35) <sup>e,l</sup> | Ceftazidime-avibactam    | 0.12              | 0.25      | 0.03–0.5                   |

| Organism, phenotype (no. of isolates) <sup>a</sup>      | Antimicrobial agent                          | MIC (µg/ml) <sup>b</sup> |                   |                 | % Susceptible <sup>c</sup> |      |
|---------------------------------------------------------|----------------------------------------------|--------------------------|-------------------|-----------------|----------------------------|------|
|                                                         |                                              | MIC <sub>50</sub>        | MIC <sub>90</sub> | Range           |                            |      |
|                                                         | Ceftazidime                                  | 0.25                     | 0.5               | 0.06–8          | 97.1                       |      |
|                                                         | Cefepime                                     | ≤0.12                    | 0.25              | ≤0.12–>16       | 97.1                       |      |
|                                                         | Aztreonam                                    | 0.12                     | 0.25              | 0.03–>128       | 97.1                       |      |
|                                                         | Piperacillin-tazobactam                      | 1                        | 4                 | ≤0.25–>128      | 97.1                       |      |
|                                                         | Doripenem                                    | 0.12                     | 0.25              | 0.06–>4         | 97.1                       |      |
|                                                         | Imipenem                                     | 0.5                      | 2                 | 0.25–>8         | 85.7                       |      |
|                                                         | Meropenem                                    | 0.06                     | 0.12              | 0.06–>8         | 97.1                       |      |
|                                                         | Amikacin                                     | 2                        | 4                 | 0.5–16          | 100                        |      |
|                                                         | Colistin (n=21) <sup>d</sup>                 | >4                       | >4                | 0.25–>4         | 9.5                        |      |
|                                                         | Tigecycline                                  | 1                        | 2                 | 0.12–4          | 91.4                       |      |
|                                                         | Levofloxacin                                 | 0.12                     | 0.5               | ≤0.03–2         | 100                        |      |
|                                                         | Ceftazidime-non-susceptible (1) <sup>e</sup> | Ceftazidime-avibactam    | —                 | —               | 0.5                        | 100  |
|                                                         |                                              | Ceftazidime              | — <sup>b</sup>    | —               | 8                          | 0    |
|                                                         |                                              | Cefepime                 | —                 | —               | >16                        | 0    |
| Aztreonam                                               |                                              | —                        | —                 | >128            | 0                          |      |
| Piperacillin-tazobactam                                 |                                              | —                        | —                 | >128            | 0                          |      |
| Doripenem                                               |                                              | —                        | —                 | >4              | 0                          |      |
| Imipenem                                                |                                              | —                        | —                 | >8              | 0                          |      |
| Meropenem                                               |                                              | —                        | —                 | >8              | 0                          |      |
| Amikacin                                                |                                              | —                        | —                 | 16              | 100                        |      |
| Colistin (n=0) <sup>d</sup>                             |                                              | —                        | —                 | ND <sup>d</sup> | ND                         |      |
| Tigecycline                                             |                                              | —                        | —                 | 4               | 0                          |      |
| Levofloxacin                                            |                                              | —                        | —                 | 0.25            | 100                        |      |
| Meropenem non-susceptible (1) <sup>e</sup>              |                                              | Ceftazidime-avibactam    | — <sup>b</sup>    | —               | 0.5                        | 100  |
|                                                         |                                              | Ceftazidime              | —                 | —               | 8                          | 0    |
|                                                         | Cefepime                                     | —                        | —                 | >16             | 0                          |      |
|                                                         | Aztreonam                                    | —                        | —                 | >128            | 0                          |      |
|                                                         | Piperacillin-tazobactam                      | —                        | —                 | >128            | 0                          |      |
|                                                         | Doripenem                                    | —                        | —                 | >4              | 0                          |      |
|                                                         | Imipenem                                     | —                        | —                 | >8              | 0                          |      |
|                                                         | Meropenem                                    | —                        | —                 | >8              | 0                          |      |
|                                                         | Amikacin                                     | —                        | —                 | 16              | 100                        |      |
|                                                         | Colistin (n=0) <sup>d</sup>                  | —                        | —                 | ND <sup>d</sup> | ND                         |      |
|                                                         | Tigecycline                                  | —                        | —                 | 4               | 0                          |      |
|                                                         | Levofloxacin                                 | —                        | —                 | 0.25            | 100                        |      |
|                                                         | Multidrug-resistant (1) <sup>e</sup>         | Ceftazidime-avibactam    | — <sup>b</sup>    | —               | 0.5                        | 100  |
|                                                         |                                              | Ceftazidime              | —                 | —               | 8                          | 0    |
| Cefepime                                                |                                              | —                        | —                 | >16             | 0                          |      |
| Aztreonam                                               |                                              | —                        | —                 | >128            | 0                          |      |
| Piperacillin-tazobactam                                 |                                              | —                        | —                 | >128            | 0                          |      |
| Doripenem                                               |                                              | —                        | —                 | >4              | 0                          |      |
| Imipenem                                                |                                              | —                        | —                 | >8              | 0                          |      |
| Meropenem                                               |                                              | —                        | —                 | >8              | 0                          |      |
| Amikacin                                                |                                              | —                        | —                 | 16              | 100                        |      |
| Colistin (n=0) <sup>d</sup>                             |                                              | —                        | —                 | ND <sup>d</sup> | ND                         |      |
| Tigecycline                                             |                                              | —                        | —                 | 4               | 0                          |      |
| Levofloxacin                                            |                                              | —                        | —                 | 0.25            | 100                        |      |
| <i>Pseudomonas aeruginosa</i> <sup>g</sup><br>All (200) |                                              | Ceftazidime-avibactam    | 2                 | 32              | 0.12–>128                  | 86.0 |
|                                                         |                                              | Ceftazidime              | 4                 | 128             | 0.25–>128                  | 68.5 |
|                                                         | Cefepime                                     | 4                        | >16               | ≤0.12–>16       | 68.0                       |      |
|                                                         | Aztreonam                                    | 8                        | >128              | 0.12–>128       | 56.0                       |      |
|                                                         | Piperacillin-tazobactam                      | 16                       | >128              | 1–>128          | 55.0                       |      |
|                                                         | Doripenem                                    | 1                        | >4                | 0.03–>4         | 67.0                       |      |
|                                                         | Imipenem                                     | 2                        | >8                | 0.5–>8          | 58.0                       |      |
|                                                         | Meropenem                                    | 0.5                      | >8                | ≤0.06–>8        | 66.5                       |      |
|                                                         | Amikacin                                     | 4                        | >32               | ≤0.25–>32       | 83.5                       |      |
|                                                         | Colistin (n=142) <sup>d</sup>                | 1                        | 2                 | 0.25–4          | 96.5                       |      |
|                                                         | Levofloxacin                                 | 1                        | >4                | ≤0.03–>4        | 75.5                       |      |

| Organism, phenotype (no. of isolates) <sup>a</sup> | Antimicrobial agent           | MIC (µg/ml) <sup>b</sup> |                   |           | % Susceptible <sup>c</sup> |
|----------------------------------------------------|-------------------------------|--------------------------|-------------------|-----------|----------------------------|
|                                                    |                               | MIC <sub>50</sub>        | MIC <sub>90</sub> | Range     |                            |
| All, MBL-negative (187)                            | Ceftazidime-avibactam         | 2                        | 8                 | 0.12–128  | 90.9                       |
|                                                    | Ceftazidime                   | 4                        | 128               | 0.25–>128 | 72.7                       |
|                                                    | Cefepime                      | 4                        | >16               | ≤0.12–>16 | 71.7                       |
|                                                    | Aztreonam                     | 8                        | >128              | 0.12–>128 | 56.7                       |
|                                                    | Piperacillin-tazobactam       | 16                       | >128              | 1–>128    | 57.8                       |
|                                                    | Doripenem                     | 1                        | >4                | 0.03–>4   | 71.7                       |
|                                                    | Imipenem                      | 2                        | >8                | 0.5–>8    | 62.0                       |
|                                                    | Meropenem                     | 0.5                      | >8                | ≤0.06–>8  | 70.6                       |
|                                                    | Amikacin                      | 4                        | >32               | ≤0.25–>32 | 88.8                       |
|                                                    | Colistin (n=131) <sup>d</sup> | 1                        | 2                 | 0.25–4    | 96.2                       |
|                                                    | Levofloxacin                  | 1                        | >4                | ≤0.03–>4  | 78.1                       |
| Ceftazidime-non-susceptible (63)                   | Ceftazidime-avibactam         | 8                        | 64                | 2–>128    | 55.6                       |
|                                                    | Ceftazidime                   | 64                       | 128               | 16–>128   | 0                          |
|                                                    | Cefepime                      | 16                       | >16               | 4–>16     | 12.7                       |
|                                                    | Aztreonam                     | 64                       | >128              | 4–>128    | 12.7                       |
|                                                    | Piperacillin-tazobactam       | >128                     | >128              | 8–>128    | 3.2                        |
|                                                    | Doripenem                     | >4                       | >4                | 0.25–>4   | 30.2                       |
|                                                    | Imipenem                      | >8                       | >8                | 1–>8      | 23.8                       |
|                                                    | Meropenem                     | >8                       | >8                | 0.12–>8   | 33.3                       |
|                                                    | Amikacin                      | 16                       | >32               | 2–>32     | 55.6                       |
|                                                    | Colistin (n=43) <sup>d</sup>  | 1                        | 2                 | 0.5–2     | 100                        |
|                                                    | Levofloxacin                  | 4                        | >4                | 0.25–>4   | 47.6                       |
| Ceftazidime-non-susceptible, MBL-negative (51)     | Ceftazidime-avibactam         | 8                        | 64                | 2–128     | 66.7                       |
|                                                    | Ceftazidime                   | 64                       | 128               | 16–>128   | 0                          |
|                                                    | Cefepime                      | >16                      | >16               | 4–>16     | 13.7                       |
|                                                    | Aztreonam                     | 128                      | >128              | 4–>128    | 5.9                        |
|                                                    | Piperacillin-tazobactam       | >128                     | >128              | 8–>128    | 2.0                        |
|                                                    | Doripenem                     | >4                       | >4                | 0.25–>4   | 37.3                       |
|                                                    | Imipenem                      | >8                       | >8                | 1–>8      | 29.4                       |
|                                                    | Meropenem                     | >8                       | >8                | 0.12–>8   | 39.2                       |
|                                                    | Amikacin                      | 8                        | >32               | 2–>32     | 66.7                       |
|                                                    | Colistin (n=33) <sup>d</sup>  | 1                        | 2                 | 0.5–2     | 100                        |
|                                                    | Levofloxacin                  | 2                        | >4                | 0.25–>4   | 51.0                       |
| Meropenem non-susceptible (67)                     | Ceftazidime-avibactam         | 8                        | 64                | 2–>128    | 67.2                       |
|                                                    | Ceftazidime                   | 64                       | 128               | 2–>128    | 37.3                       |
|                                                    | Cefepime                      | 16                       | >16               | 2–>16     | 26.9                       |
|                                                    | Aztreonam                     | 32                       | >128              | 4–>128    | 19.4                       |
|                                                    | Piperacillin-tazobactam       | 64                       | >128              | 8–>128    | 23.9                       |
|                                                    | Doripenem                     | >4                       | >4                | 0.5–>4    | 4.5                        |
|                                                    | Imipenem                      | >8                       | >8                | 2–>8      | 4.5                        |
|                                                    | Meropenem                     | >8                       | >8                | 4–>8      | 0                          |
|                                                    | Amikacin                      | 16                       | >32               | 2–>32     | 56.7                       |
|                                                    | Colistin (n=48) <sup>d</sup>  | 2                        | 2                 | 0.5–4     | 97.9                       |
|                                                    | Levofloxacin                  | >4                       | >4                | 0.25–>4   | 37.3                       |
| Meropenem non-susceptible, MBL-negative (55)       | Ceftazidime-avibactam         | 8                        | 32                | 2–128     | 78.2                       |
|                                                    | Ceftazidime                   | 64                       | 128               | 2–>128    | 43.6                       |
|                                                    | Cefepime                      | >16                      | >16               | 2–>16     | 29.1                       |
|                                                    | Aztreonam                     | 64                       | >128              | 4–>128    | 14.6                       |
|                                                    | Piperacillin-tazobactam       | >128                     | >128              | 8–>128    | 25.5                       |
|                                                    | Doripenem                     | >4                       | >4                | 0.5–>4    | 5.5                        |
|                                                    | Imipenem                      | >8                       | >8                | 2–>8      | 5.5                        |
|                                                    | Meropenem                     | >8                       | >8                | 4–>8      | 0                          |
|                                                    | Amikacin                      | 8                        | >32               | 2–>32     | 67.3                       |
|                                                    | Colistin (n=37) <sup>d</sup>  | 1                        | 2                 | 0.5–4     | 97.3                       |
|                                                    | Levofloxacin                  | >4                       | >4                | 0.25–>4   | 38.2                       |
| Multidrug-resistant (47)                           | Ceftazidime-avibactam         | 8                        | 64                | 2–>128    | 57.5                       |
|                                                    | Ceftazidime                   | 64                       | 128               | 2–>128    | 14.9                       |
|                                                    | Cefepime                      | >16                      | >16               | 16–>16    | 0                          |
|                                                    | Aztreonam                     | 128                      | >128              | 8–>128    | 2.1                        |

| Organism, phenotype (no. of isolates) <sup>a</sup> | Antimicrobial agent          | MIC (µg/ml) <sup>b</sup> |                   |         | % Susceptible <sup>c</sup> |
|----------------------------------------------------|------------------------------|--------------------------|-------------------|---------|----------------------------|
|                                                    |                              | MIC <sub>50</sub>        | MIC <sub>90</sub> | Range   |                            |
|                                                    | Piperacillin-tazobactam      | >128                     | >128              | 16->128 | 2.1                        |
|                                                    | Doripenem                    | >4                       | >4                | 1->4    | 4.3                        |
|                                                    | Imipenem                     | >8                       | >8                | 1->8    | 6.4                        |
|                                                    | Meropenem                    | >8                       | >8                | 0.5->8  | 6.4                        |
|                                                    | Amikacin                     | 32                       | >32               | 2->32   | 48.9                       |
|                                                    | Colistin (n=29) <sup>d</sup> | 2                        | 2                 | 0.5-2   | 100                        |
|                                                    | Levofloxacin                 | >4                       | >4                | 0.25->4 | 21.3                       |
| Multidrug-resistant, MBL-negative (39)             | Ceftazidime-avibactam        | 8                        | 64                | 2-128   | 66.7                       |
|                                                    | Ceftazidime                  | 128                      | >128              | 2->128  | 18.0                       |
|                                                    | Cefepime                     | >16                      | >16               | 16->16  | 0                          |
|                                                    | Aztreonam                    | >128                     | >128              | 16->128 | 0                          |
|                                                    | Piperacillin-tazobactam      | >128                     | >128              | 16->128 | 2.6                        |
|                                                    | Doripenem                    | >4                       | >4                | 1->4    | 5.1                        |
|                                                    | Imipenem                     | >8                       | >8                | 1->8    | 7.7                        |
|                                                    | Meropenem                    | >8                       | >8                | 0.5->8  | 7.7                        |
|                                                    | Amikacin                     | 16                       | >32               | 2->32   | 56.4                       |
|                                                    | Colistin (n=22) <sup>d</sup> | 1                        | 2                 | 0.5-2   | 100                        |
|                                                    | Levofloxacin                 | >4                       | >4                | 0.25->4 | 23.1                       |

311 <sup>a</sup> MBL-negative, no gene encoding a metallo-β-lactamase was detected by polymerase chain reaction assay.

312 <sup>b</sup> —, MIC<sub>50</sub> and MIC<sub>90</sub> were not calculated for n <10 isolates.

313 <sup>c</sup> % Susceptibility was determined according to CLSI 2016 breakpoints with the exception of ceftazidime-avibactam  
314 and tigecycline where US FDA breakpoints were applied and colistin where EUCAST breakpoints were applied.

315 <sup>d</sup> Values are for colistin tested without 0.002% polysorbate-80; isolates collected in 2014-2015 only. ND, not  
316 determined; MIC range and % susceptible were not determined for n=0 isolates.

317 <sup>e</sup> All isolates were MBL-negative.

318 <sup>f</sup> Excluded isolates of Proteae and *Serratia* spp., which are intrinsically resistant to colistin.

319 <sup>g</sup> No colistin-resistant isolates were collected.

320 <sup>h</sup> *Enterobacter* spp. included *Enterobacter aerogenes* (n=34), *Enterobacter asburiae* (n=7), *Enterobacter cloacae*  
321 (n=59), *Enterobacter kobei* (n=1), and *Enterobacter ludwigii* (n=1).

322 <sup>i</sup> *Citrobacter* spp. included *Citrobacter braakii* (n=3), *Citrobacter freundii* (n=37), and *Citrobacter koseri* (n=12).

323 <sup>j</sup> Proteae included *Morganella morganii* (n=29), *Proteus mirabilis* (n=58), *Proteus penneri* (n=1), *Proteus vulgaris*  
324 (n=17), *Providencia rettgeri* (n=5), and *Providencia stuartii* (n=2).

325 <sup>k</sup> The one meropenem non-susceptible Proteae isolate carried an MBL.

326 <sup>l</sup> Other *Enterobacteriaceae* included *Raoultella ornithinolytica* (n=3) and *Serratia marcescens* (n=32).



327 **Table S5B.** Colombia - *In vitro* activities of ceftazidime-avibactam and comparator  
 328 antimicrobial agents tested against 357 isolates of  $\beta$ -lactamase-positive *Enterobacteriaceae*  
 329 (n=279) and *P. aeruginosa* (n=78) collected as part of the INFORM global surveillance program  
 330 in 2012–2015.  
 331

| Organism/Genotype (no. of isolates) <sup>a</sup> | Antimicrobial agent          | MIC ( $\mu\text{g/ml}$ ) <sup>b</sup> |                   |                   | % Susceptible <sup>c</sup> |
|--------------------------------------------------|------------------------------|---------------------------------------|-------------------|-------------------|----------------------------|
|                                                  |                              | MIC <sub>50</sub>                     | MIC <sub>90</sub> | Range             |                            |
| <i>Enterobacteriaceae</i> (279)                  |                              |                                       |                   |                   |                            |
| OSBL-positive (12)                               |                              |                                       |                   |                   |                            |
|                                                  | Ceftazidime-avibactam        | 0.5                                   | 1                 | 0.12–2            | 100                        |
|                                                  | Ceftazidime                  | 4                                     | 32                | 2–128             | 58.3                       |
|                                                  | Cefepime                     | 0.5                                   | 2                 | 0.25–2            | 100                        |
|                                                  | Aztreonam                    | 0.5                                   | 4                 | 0.25–128          | 91.7                       |
|                                                  | Piperacillin-tazobactam      | >128                                  | >128              | 8–>128            | 8.3                        |
|                                                  | Doripenem                    | 0.06                                  | 0.12              | 0.06–0.12         | 100                        |
|                                                  | Imipenem                     | 0.25                                  | 0.5               | 0.12–0.5          | 100                        |
|                                                  | Meropenem                    | 0.03                                  | 0.06              | 0.03–0.12         | 100                        |
|                                                  | Amikacin                     | 1                                     | 2                 | 0.5–4             | 100                        |
|                                                  | Colistin (n=4) <sup>d</sup>  | — <sup>b</sup>                        | —                 | 0.25–1            | 100                        |
|                                                  | Tigecycline                  | 0.5                                   | 1                 | 0.25–2            | 100                        |
|                                                  | Levofloxacin                 | 0.06                                  | 0.12              | 0.03–1            | 100                        |
| ESBL-positive (140) <sup>e</sup>                 |                              |                                       |                   |                   |                            |
|                                                  | Ceftazidime-avibactam        | 0.25                                  | 0.5               | 0.03–1            | 100                        |
|                                                  | Ceftazidime                  | 32                                    | 64                | 1–>128            | 13.6                       |
|                                                  | Cefepime                     | >16                                   | >16               | $\leq 0.12$ –>16  | 7.1                        |
|                                                  | Aztreonam                    | 32                                    | 128               | 0.5–>128          | 3.6                        |
|                                                  | Piperacillin-tazobactam      | 8                                     | 128               | 0.5–>128          | 72.1                       |
|                                                  | Doripenem                    | 0.06                                  | 0.12              | 0.015–1           | 100                        |
|                                                  | Imipenem                     | 0.25                                  | 0.25              | 0.06–4            | 97.9                       |
|                                                  | Meropenem                    | 0.03                                  | 0.06              | 0.015–2           | 99.3                       |
|                                                  | Amikacin                     | 4                                     | 16                | 0.5–>32           | 95.7                       |
|                                                  | Colistin (n=74) <sup>d</sup> | 0.5                                   | 1                 | 0.25–>4           | 98.6                       |
|                                                  | Tigecycline                  | 0.5                                   | 2                 | 0.06–8            | 96.4                       |
|                                                  | Levofloxacin                 | >4                                    | >4                | $\leq 0.03$ –>4   | 32.9                       |
| AmpC-positive (33) <sup>f</sup>                  |                              |                                       |                   |                   |                            |
|                                                  | Ceftazidime-avibactam        | 0.25                                  | 2                 | 0.03–4            | 100                        |
|                                                  | Ceftazidime                  | 32                                    | 128               | 0.06–>128         | 33.3                       |
|                                                  | Cefepime                     | 0.25                                  | 8                 | $\leq 0.12$ –>16  | 78.8                       |
|                                                  | Aztreonam                    | 8                                     | 64                | $\leq 0.015$ –128 | 39.4                       |
|                                                  | Piperacillin-tazobactam      | 8                                     | >128              | $\leq 0.25$ –>128 | 72.7                       |
|                                                  | Doripenem                    | 0.12                                  | 0.25              | 0.03–>4           | 97.0                       |
|                                                  | Imipenem                     | 0.5                                   | 2                 | 0.12–>8           | 60.6                       |
|                                                  | Meropenem                    | 0.06                                  | 0.25              | 0.015–>8          | 93.9                       |
|                                                  | Amikacin                     | 4                                     | 8                 | 0.5–32            | 93.9                       |
|                                                  | Colistin (n=12) <sup>d</sup> | 1                                     | >4                | 0.25–>4           | 75.0                       |
|                                                  | Tigecycline                  | 0.5                                   | 2                 | 0.06–4            | 97.0                       |
|                                                  | Levofloxacin                 | 0.25                                  | >4                | $\leq 0.03$ –>4   | 69.7                       |
| ESBL-positive + AmpC-positive (6) <sup>g</sup>   |                              |                                       |                   |                   |                            |
|                                                  | Ceftazidime-avibactam        | — <sup>b</sup>                        | —                 | 0.25–2            | 100                        |
|                                                  | Ceftazidime                  | —                                     | —                 | 4–>128            | 16.7                       |
|                                                  | Cefepime                     | —                                     | —                 | 8–>16             | 0                          |
|                                                  | Aztreonam                    | —                                     | —                 | 64–>128           | 0                          |
|                                                  | Piperacillin-tazobactam      | —                                     | —                 | 32–>128           | 0                          |
|                                                  | Doripenem                    | —                                     | —                 | 0.03–1            | 100                        |
|                                                  | Imipenem                     | —                                     | —                 | 0.25–>8           | 66.7                       |
|                                                  | Meropenem                    | —                                     | —                 | 0.03–1            | 100                        |
|                                                  | Amikacin                     | —                                     | —                 | 1–>32             | 66.7                       |
|                                                  | Colistin (n=1) <sup>d</sup>  | —                                     | —                 | 0.5               | 100                        |
|                                                  | Tigecycline                  | —                                     | —                 | 0.12–4            | 83.3                       |
|                                                  | Levofloxacin                 | —                                     | —                 | 0.06–>4           | 16.7                       |
| KPC-positive (84) <sup>h</sup>                   |                              |                                       |                   |                   |                            |
|                                                  | Ceftazidime-avibactam        | 0.5                                   | 2                 | 0.03–4            | 100                        |

|                                                    |                              |                |      |           |      |
|----------------------------------------------------|------------------------------|----------------|------|-----------|------|
|                                                    | Ceftazidime                  | 16             | >128 | 0.5->128  | 22.6 |
|                                                    | Cefepime                     | 16             | >16  | ≤0.12->16 | 26.2 |
|                                                    | Aztreonam                    | 128            | >128 | 4->128    | 3.6  |
|                                                    | Piperacillin-tazobactam      | >128           | >128 | 16->128   | 1.2  |
|                                                    | Doripenem                    | 4              | >4   | 0.06->4   | 25.0 |
|                                                    | Imipenem                     | 8              | >8   | 0.12->8   | 3.6  |
|                                                    | Meropenem                    | 8              | >8   | 0.03->8   | 15.5 |
|                                                    | Amikacin                     | 4              | 32   | 0.5->32   | 76.2 |
|                                                    | Colistin (n=58) <sup>d</sup> | 0.5            | 2    | 0.25->4   | 91.4 |
|                                                    | Tigecycline                  | 0.5            | 2    | 0.12-4    | 96.4 |
|                                                    | Levofloxacin                 | 1              | >4   | ≤0.03->4  | 57.1 |
| <hr/>                                              |                              |                |      |           |      |
| MBL-positive (4) <sup>i</sup>                      | Ceftazidime-avibactam        | — <sup>b</sup> | —    | 64->128   | 0    |
|                                                    | Ceftazidime                  | —              | —    | 64->128   | 0    |
|                                                    | Cefepime                     | —              | —    | 16->16    | 0    |
|                                                    | Aztreonam                    | —              | —    | 0.06-64   | 25.0 |
|                                                    | Piperacillin-tazobactam      | —              | —    | >128->128 | 0    |
|                                                    | Doripenem                    | —              | —    | 4->4      | 0    |
|                                                    | Imipenem                     | —              | —    | 8->8      | 0    |
|                                                    | Meropenem                    | —              | —    | 4->8      | 0    |
|                                                    | Amikacin                     | —              | —    | 2-16      | 100  |
|                                                    | Colistin (n=4) <sup>d</sup>  | —              | —    | 0.25->4   | 75.0 |
|                                                    | Tigecycline                  | —              | —    | 0.5-4     | 50.0 |
|                                                    | Levofloxacin                 | —              | —    | 0.5->4    | 75.0 |
| <hr/>                                              |                              |                |      |           |      |
| <i>P. aeruginosa</i> (78)                          |                              |                |      |           |      |
| KPC-positive (21) <sup>j,k</sup>                   | Ceftazidime-avibactam        | 8              | 64   | 4-128     | 61.9 |
|                                                    | Ceftazidime                  | 128            | >128 | 8->128    | 4.8  |
|                                                    | Cefepime                     | >16            | >16  | 16->16    | 0    |
|                                                    | Aztreonam                    | >128           | >128 | 64->128   | 0    |
|                                                    | Piperacillin-tazobactam      | >128           | >128 | 32->128   | 0    |
|                                                    | Doripenem                    | >4             | >4   | >4->4     | 0    |
|                                                    | Imipenem                     | >8             | >8   | >8->8     | 0    |
|                                                    | Meropenem                    | >8             | >8   | >8->8     | 0    |
|                                                    | Amikacin                     | 16             | >32  | 2->32     | 52.4 |
|                                                    | Colistin (n=14) <sup>d</sup> | 1              | 2    | 0.5-2     | 100  |
|                                                    | Levofloxacin                 | >4             | >4   | 0.25->4   | 19.0 |
| <hr/>                                              |                              |                |      |           |      |
| MBL-positive (13) <sup>j,l</sup>                   | Ceftazidime-avibactam        | 32             | 128  | 8->128    | 15.4 |
|                                                    | Ceftazidime                  | 32             | 128  | 8-128     | 7.7  |
|                                                    | Cefepime                     | 16             | >16  | 8->16     | 15.4 |
|                                                    | Aztreonam                    | 16             | 32   | 4-64      | 46.2 |
|                                                    | Piperacillin-tazobactam      | 64             | 128  | 16-128    | 15.4 |
|                                                    | Doripenem                    | >4             | >4   | 4->4      | 0    |
|                                                    | Imipenem                     | >8             | >8   | >8->8     | 0    |
|                                                    | Meropenem                    | >8             | >8   | 2->8      | 7.7  |
|                                                    | Amikacin                     | >32            | >32  | 16->32    | 7.7  |
|                                                    | Colistin (n=11) <sup>d</sup> | 2              | 2    | 1-2       | 100  |
|                                                    | Levofloxacin                 | >4             | >4   | 0.25->4   | 38.5 |
| <hr/>                                              |                              |                |      |           |      |
| No acquired β-lactamase detected (44) <sup>j</sup> | Ceftazidime-avibactam        | 4              | 32   | 1-128     | 88.6 |
|                                                    | Ceftazidime                  | 4              | 128  | 2-128     | 70.5 |
|                                                    | Cefepime                     | 8              | >16  | 1->16     | 56.8 |
|                                                    | Aztreonam                    | 32             | 64   | 4->128    | 36.4 |
|                                                    | Piperacillin-tazobactam      | 32             | >128 | 4->128    | 45.5 |
|                                                    | Doripenem                    | >4             | >4   | 0.25->4   | 27.3 |
|                                                    | Imipenem                     | >8             | >8   | 2->8      | 9.1  |
|                                                    | Meropenem                    | 8              | >8   | 0.25->8   | 22.7 |
|                                                    | Amikacin                     | 4              | >32  | 2->32     | 79.5 |
|                                                    | Colistin (n=26) <sup>d</sup> | 2              | 2    | 0.5-4     | 96.2 |
|                                                    | Levofloxacin                 | 2              | >4   | 0.25->4   | 59.1 |

332 <sup>a</sup> OSBL, original-spectrum β-lactamase (e.g. TEM-1, SHV-1, SHV-11); ESBL, extended-spectrum β-lactamase;

333 MBL, metallo-β-lactamase.

334 <sup>b</sup>—, MIC<sub>50</sub> and MIC<sub>90</sub> were not calculated for n <10 isolates.

335 <sup>c</sup>% Susceptibility was determined according to CLSI 2016 breakpoints with the exception of ceftazidime-avibactam  
336 and tigecycline where US FDA breakpoints were applied and colistin where EUCAST breakpoints were applied.

337 <sup>d</sup> Values are for colistin tested without 0.002% polysorbate-80; isolates collected in 2014-2015 only.

338 <sup>e</sup> Included isolates carrying CTX-M-1; CTX-M-2; CTX-M-3; CTX-M-8; CTX-M-12; CTX-M-15; CTX-M-27;  
339 CTX-M-55; CTX-M-65; CTX-M-15 and CTX-M-2; CTX-M-15 and CTX-M-12; CTX-M-15 and CTX-M-27; CTX-  
340 M-15 and CTX-M-65; CTX-M-2 and SHV-41; CTX-M-15 and SHV-12; SHV-5; SHV-12; with or without a SHV-  
341 OSBL and/or TEM-OSBL.

342 <sup>f</sup> Included isolates carrying CMY-2 and/ or the chromosomal AmpCs common to *Citrobacter* spp., *Enterobacter*  
343 spp., *M. morgani*, and *Serratia* spp. with or without a TEM-OSBL.

344 <sup>g</sup> Included isolates carrying CTX-M-15 and CMY-2; the chromosomal ESBL common to *K. oxytoca* and CMY-2;  
345 and the chromosomal AmpC common to *Enterobacter* spp. with CTX-M-12 or CTX-M-12 and SHV-5; with or  
346 without a TEM-OSBL.

347 <sup>h</sup> Included isolates carrying KPC-2; KPC-3; KPC-2 and CTX-M-1; KPC-2 and CTX-M-12; KPC-2 and CTX-M-15;  
348 KPC-3 and SHV-12; KPC-2 and CTX-M-1 and CTX-M-2; KPC-3 and CTX-M-12 and SHV-12; and the  
349 chromosomal β-lactamases common to *Citrobacter* spp., *Enterobacter* spp., *Serratia* spp., and *K. oxytoca* with or  
350 without a SHV-OSBL and/or TEM-OSBL.

351 <sup>i</sup> Included isolates carrying NDM-1 and CTX-M-15, and NDM-1 and the chromosomal AmpC common to  
352 *Providencia* spp., with or without a SHV-OSBL and/or TEM-OSBL.

353 <sup>j</sup> Assumed to carry the chromosomal AmpC common to *P. aeruginosa*.

354 <sup>k</sup> Isolates carrying KPC-2.

355 <sup>l</sup> Isolates carrying VIM-2.

356 **Table S6A.** Mexico - *In vitro* activities of ceftazidime-avibactam and comparator antimicrobial  
 357 agents tested against 2,319 isolates of *Enterobacteriaceae* and *P. aeruginosa* collected as part of  
 358 the INFORM global surveillance program in 2012-2015.  
 359

| Organism, phenotype (no. of isolates) <sup>a</sup> | Antimicrobial agent                             | MIC (µg/ml) <sup>b</sup> |                   |             | % Susceptible <sup>c</sup> |      |
|----------------------------------------------------|-------------------------------------------------|--------------------------|-------------------|-------------|----------------------------|------|
|                                                    |                                                 | MIC <sub>50</sub>        | MIC <sub>90</sub> | Range       |                            |      |
| <i>Enterobacteriaceae</i>                          |                                                 |                          |                   |             |                            |      |
| All (1,862)                                        | Ceftazidime-avibactam                           | 0.12                     | 0.5               | ≤0.015->128 | 99.4                       |      |
|                                                    | Ceftazidime                                     | 0.5                      | 64                | 0.03->128   | 61.4                       |      |
|                                                    | Cefepime                                        | ≤0.12                    | >16               | ≤0.12->16   | 63.7                       |      |
|                                                    | Aztreonam                                       | 0.12                     | 64                | ≤0.015->128 | 61.6                       |      |
|                                                    | Piperacillin-tazobactam                         | 4                        | 32                | ≤0.25->128  | 85.0                       |      |
|                                                    | Doripenem                                       | 0.06                     | 0.25              | ≤0.008->4   | 98.7                       |      |
|                                                    | Imipenem                                        | 0.25                     | 2                 | 0.06->8     | 88.1                       |      |
|                                                    | Meropenem                                       | 0.03                     | 0.12              | 0.008->8    | 98.8                       |      |
|                                                    | Amikacin                                        | 2                        | 8                 | ≤0.25->32   | 96.2                       |      |
|                                                    | Colistin (n=1,181) <sup>d</sup>                 | 1                        | >4                | ≤0.12->4    | 85.4                       |      |
|                                                    | Tigecycline                                     | 0.5                      | 2                 | 0.06-8      | 93.0                       |      |
|                                                    | Levofloxacin                                    | 0.5                      | >4                | ≤0.03->4    | 65.0                       |      |
|                                                    | All, MBL-negative (1,851)                       | Ceftazidime-avibactam    | 0.12              | 0.5         | ≤0.015-128                 | 100  |
|                                                    |                                                 | Ceftazidime              | 0.5               | 64          | 0.03->128                  | 61.7 |
| Cefepime                                           |                                                 | ≤0.12                    | >16               | ≤0.12->16   | 64.0                       |      |
| Aztreonam                                          |                                                 | 0.12                     | 64                | ≤0.015->128 | 61.5                       |      |
| Piperacillin-tazobactam                            |                                                 | 4                        | 32                | ≤0.25->128  | 85.4                       |      |
| Doripenem                                          |                                                 | 0.06                     | 0.25              | ≤0.008->4   | 99.2                       |      |
| Imipenem                                           |                                                 | 0.25                     | 2                 | 0.06->8     | 88.7                       |      |
| Meropenem                                          |                                                 | 0.03                     | 0.12              | 0.008->8    | 99.4                       |      |
| Amikacin                                           |                                                 | 2                        | 8                 | ≤0.25->32   | 96.5                       |      |
| Colistin (n=1,171) <sup>d</sup>                    |                                                 | 1                        | >4                | ≤0.12->4    | 85.7                       |      |
| Tigecycline                                        |                                                 | 0.5                      | 2                 | 0.06-8      | 93.0                       |      |
| Levofloxacin                                       |                                                 | 0.5                      | >4                | ≤0.03->4    | 65.1                       |      |
| Ceftazidime non-susceptible (719)                  |                                                 | Ceftazidime-avibactam    | 0.25              | 1           | ≤0.015->128                | 98.5 |
|                                                    |                                                 | Ceftazidime              | 32                | >128        | 8->128                     | 0    |
|                                                    | Cefepime                                        | >16                      | >16               | ≤0.12->16   | 11.0                       |      |
|                                                    | Aztreonam                                       | 64                       | 128               | 0.06->128   | 2.8                        |      |
|                                                    | Piperacillin-tazobactam                         | 16                       | 128               | ≤0.25->128  | 66.8                       |      |
|                                                    | Doripenem                                       | 0.06                     | 0.12              | 0.015->4    | 97.1                       |      |
|                                                    | Imipenem                                        | 0.25                     | 0.5               | 0.06->8     | 96.0                       |      |
|                                                    | Meropenem                                       | 0.06                     | 0.12              | 0.015->8    | 96.9                       |      |
|                                                    | Amikacin                                        | 4                        | 16                | ≤0.25->32   | 91.1                       |      |
|                                                    | Colistin (n=461) <sup>d</sup>                   | 1                        | 1                 | ≤0.12->4    | 97.0                       |      |
|                                                    | Tigecycline                                     | 0.5                      | 2                 | 0.06-8      | 96.2                       |      |
|                                                    | Levofloxacin                                    | >4                       | >4                | ≤0.03->4    | 34.1                       |      |
|                                                    | Ceftazidime non-susceptible, MBL-negative (709) | Ceftazidime-avibactam    | 0.25              | 0.5         | ≤0.015-128                 | 99.9 |
|                                                    |                                                 | Ceftazidime              | 32                | >128        | 8->128                     | 0    |
| Cefepime                                           |                                                 | >16                      | >16               | ≤0.12->16   | 11.0                       |      |
| Aztreonam                                          |                                                 | 64                       | 128               | 0.06->128   | 2.0                        |      |
| Piperacillin-tazobactam                            |                                                 | 16                       | 128               | ≤0.25->128  | 67.7                       |      |
| Doripenem                                          |                                                 | 0.06                     | 0.12              | 0.015->4    | 98.5                       |      |
| Imipenem                                           |                                                 | 0.25                     | 0.5               | 0.06->8     | 97.3                       |      |
| Meropenem                                          |                                                 | 0.06                     | 0.12              | 0.015->8    | 98.3                       |      |
| Amikacin                                           |                                                 | 4                        | 16                | ≤0.25->32   | 91.8                       |      |
| Colistin (n=451) <sup>d</sup>                      |                                                 | 0.5                      | 1                 | ≤0.12->4    | 97.8                       |      |
| Tigecycline                                        |                                                 | 0.5                      | 2                 | 0.06-8      | 96.3                       |      |
| Levofloxacin                                       |                                                 | >4                       | >4                | ≤0.03->4    | 33.9                       |      |
| Meropenem non-susceptible (22)                     |                                                 | Ceftazidime-avibactam    | 2                 | 64          | 0.25->128                  | 54.6 |
|                                                    |                                                 | Ceftazidime              | 128               | >128        | 8->128                     | 0    |
|                                                    | Cefepime                                        | >16                      | >16               | 1->16       | 9.1                        |      |

| Organism, phenotype (no. of isolates) <sup>a</sup> | Antimicrobial agent           | MIC (µg/ml) <sup>b</sup> |                   |             | % Susceptible <sup>c</sup> |
|----------------------------------------------------|-------------------------------|--------------------------|-------------------|-------------|----------------------------|
|                                                    |                               | MIC <sub>50</sub>        | MIC <sub>90</sub> | Range       |                            |
|                                                    | Aztreonam                     | 128                      | >128              | 0.06->128   | 27.3                       |
|                                                    | Piperacillin-tazobactam       | >128                     | >128              | 16->128     | 4.6                        |
|                                                    | Doripenem                     | 4                        | >4                | 1->4        | 4.6                        |
|                                                    | Imipenem                      | 4                        | >8                | 0.25->8     | 13.6                       |
|                                                    | Meropenem                     | 4                        | >8                | 2->8        | 0                          |
|                                                    | Amikacin                      | 16                       | >32               | 1->32       | 63.6                       |
|                                                    | Colistin (n=20) <sup>d</sup>  | 1                        | >4                | 0.25->4     | 70.0                       |
|                                                    | Tigecycline                   | 0.5                      | 4                 | 0.12-4      | 86.4                       |
|                                                    | Levofloxacin                  | 4                        | >4                | 0.12->4     | 45.5                       |
| Meropenem non-susceptible, MBL-negative (12)       | Ceftazidime-avibactam         | 0.5                      | 2                 | 0.25-8      | 100                        |
|                                                    | Ceftazidime                   | >128                     | >128              | 8->128      | 0                          |
|                                                    | Cefepime                      | >16                      | >16               | 1->16       | 8.3                        |
|                                                    | Aztreonam                     | >128                     | >128              | 8->128      | 0                          |
|                                                    | Piperacillin-tazobactam       | >128                     | >128              | 16->128     | 8.3                        |
|                                                    | Doripenem                     | 4                        | >4                | 1->4        | 8.3                        |
|                                                    | Imipenem                      | 4                        | >8                | 0.25->8     | 25.0                       |
|                                                    | Meropenem                     | 4                        | >8                | 2->8        | 0                          |
|                                                    | Amikacin                      | 8                        | 32                | 1->32       | 83.3                       |
|                                                    | Colistin (n=10) <sup>d</sup>  | 1                        | >4                | 0.25->4     | 80.0                       |
|                                                    | Tigecycline                   | 0.5                      | 4                 | 0.12-4      | 83.3                       |
|                                                    | Levofloxacin                  | >4                       | >4                | 0.12->4     | 41.7                       |
| Colistin-resistant (25) <sup>e</sup>               | Ceftazidime-avibactam         | 0.12                     | 32                | 0.03->128   | 84.0                       |
|                                                    | Ceftazidime                   | 0.5                      | >128              | 0.12->128   | 64.0                       |
|                                                    | Cefepime                      | ≤0.12                    | >16               | ≤0.12->16   | 76.0                       |
|                                                    | Aztreonam                     | 0.25                     | 128               | 0.06->128   | 80.0                       |
|                                                    | Piperacillin-tazobactam       | 4                        | >128              | 0.5->128    | 76.0                       |
|                                                    | Doripenem                     | 0.06                     | >4                | ≤0.008->4   | 80.0                       |
|                                                    | Imipenem                      | 1                        | 8                 | 0.12->8     | 68.0                       |
|                                                    | Meropenem                     | 0.06                     | >8                | 0.03->8     | 80.0                       |
|                                                    | Amikacin                      | 2                        | >32               | 1->32       | 76.0                       |
|                                                    | Colistin (n=25) <sup>d</sup>  | >4                       | >4                | 4->4        | 0                          |
|                                                    | Tigecycline                   | 0.5                      | 2                 | 0.12-4      | 96.0                       |
|                                                    | Levofloxacin                  | 0.12                     | >4                | 0.06->4     | 80.0                       |
| Colistin-resistant, MBL-negative (21) <sup>e</sup> | Ceftazidime-avibactam         | 0.12                     | 0.5               | 0.03-1      | 100                        |
|                                                    | Ceftazidime                   | 0.5                      | 64                | 0.12->128   | 76.2                       |
|                                                    | Cefepime                      | ≤0.12                    | 2                 | ≤0.12->16   | 90.5                       |
|                                                    | Aztreonam                     | 0.12                     | 128               | 0.06-128    | 81.0                       |
|                                                    | Piperacillin-tazobactam       | 4                        | 8                 | 0.5->128    | 90.5                       |
|                                                    | Doripenem                     | 0.06                     | 0.12              | ≤0.008-4    | 95.2                       |
|                                                    | Imipenem                      | 0.5                      | 2                 | 0.12-2      | 81.0                       |
|                                                    | Meropenem                     | 0.06                     | 0.12              | 0.03-4      | 95.2                       |
|                                                    | Amikacin                      | 2                        | 4                 | 1->32       | 90.5                       |
|                                                    | Colistin (n=21) <sup>d</sup>  | >4                       | >4                | 4->4        | 0                          |
|                                                    | Tigecycline                   | 0.5                      | 1                 | 0.12-2      | 100                        |
|                                                    | Levofloxacin                  | 0.12                     | >4                | 0.06->4     | 85.7                       |
| Multidrug-resistant (442)                          | Ceftazidime-avibactam         | 0.25                     | 1                 | ≤0.015->128 | 98.2                       |
|                                                    | Ceftazidime                   | 32                       | >128              | 0.25->128   | 1.1                        |
|                                                    | Cefepime                      | >16                      | >16               | 0.25->16    | 1.1                        |
|                                                    | Aztreonam                     | 64                       | >128              | 0.12->128   | 1.4                        |
|                                                    | Piperacillin-tazobactam       | 16                       | >128              | 0.5->128    | 65.2                       |
|                                                    | Doripenem                     | 0.06                     | 0.12              | 0.015->4    | 95.9                       |
|                                                    | Imipenem                      | 0.25                     | 0.5               | 0.06->8     | 95.5                       |
|                                                    | Meropenem                     | 0.03                     | 0.12              | 0.015->8    | 95.7                       |
|                                                    | Amikacin                      | 8                        | 32                | 0.5->32     | 88.5                       |
|                                                    | Colistin (n=282) <sup>d</sup> | 0.5                      | 1                 | ≤0.12->4    | 95.7                       |
|                                                    | Tigecycline                   | 0.25                     | 2                 | 0.06-8      | 95.3                       |
|                                                    | Levofloxacin                  | >4                       | >4                | ≤0.03->4    | 4.1                        |
| Multidrug-resistant, MBL-negative (434)            | Ceftazidime-avibactam         | 0.25                     | 1                 | ≤0.015-8    | 100                        |
|                                                    | Ceftazidime                   | 32                       | >128              | 0.25->128   | 1.2                        |

| Organism, phenotype (no. of isolates) <sup>a</sup> | Antimicrobial agent           | MIC (µg/ml) <sup>b</sup> |                   |             | % Susceptible <sup>c</sup> |
|----------------------------------------------------|-------------------------------|--------------------------|-------------------|-------------|----------------------------|
|                                                    |                               | MIC <sub>50</sub>        | MIC <sub>90</sub> | Range       |                            |
|                                                    | Cefepime                      | >16                      | >16               | 0.25->16    | 1.2                        |
|                                                    | Aztreonam                     | 64                       | >128              | 0.12->128   | 0.5                        |
|                                                    | Piperacillin-tazobactam       | 16                       | 128               | 0.5->128    | 66.4                       |
|                                                    | Doripenem                     | 0.06                     | 0.12              | 0.015->4    | 97.7                       |
|                                                    | Imipenem                      | 0.25                     | 0.5               | 0.06->8     | 97.2                       |
|                                                    | Meropenem                     | 0.03                     | 0.12              | 0.015->8    | 97.5                       |
|                                                    | Amikacin                      | 8                        | 32                | 0.5->32     | 89.6                       |
|                                                    | Colistin (n=274) <sup>d</sup> | 0.5                      | 1                 | ≤0.12->4    | 97.1                       |
|                                                    | Tigecycline                   | 0.25                     | 1                 | 0.06-8      | 95.4                       |
|                                                    | Levofloxacin                  | >4                       | >4                | ≤0.03->4    | 3.5                        |
| <i>Escherichia coli</i>                            |                               |                          |                   |             |                            |
| All (669)                                          | Ceftazidime-avibactam         | 0.12                     | 0.5               | ≤0.015-32   | 99.7                       |
|                                                    | Ceftazidime                   | 16                       | 128               | 0.03->128   | 42.9                       |
|                                                    | Cefepime                      | 16                       | >16               | ≤0.12->16   | 40.8                       |
|                                                    | Aztreonam                     | 32                       | 128               | ≤0.015->128 | 41.9                       |
|                                                    | Piperacillin-tazobactam       | 4                        | 64                | ≤0.25->128  | 82.5                       |
|                                                    | Doripenem                     | 0.03                     | 0.06              | ≤0.008->4   | 99.6                       |
|                                                    | Imipenem                      | 0.25                     | 0.25              | 0.06-8      | 99.3                       |
|                                                    | Meropenem                     | 0.03                     | 0.06              | 0.008->8    | 99.4                       |
|                                                    | Amikacin                      | 4                        | 16                | 0.5->32     | 94.6                       |
|                                                    | Colistin (n=411) <sup>d</sup> | 0.5                      | 1                 | ≤0.12->4    | 99.8                       |
|                                                    | Tigecycline                   | 0.25                     | 0.5               | 0.06-4      | 99.7                       |
|                                                    | Levofloxacin                  | >4                       | >4                | ≤0.03->4    | 28.4                       |
| All, MBL-negative (667)                            | Ceftazidime-avibactam         | 0.12                     | 0.5               | ≤0.015-4    | 100                        |
|                                                    | Ceftazidime                   | 16                       | 128               | 0.03->128   | 43.0                       |
|                                                    | Cefepime                      | 16                       | >16               | ≤0.12->16   | 40.9                       |
|                                                    | Aztreonam                     | 32                       | 128               | ≤0.015->128 | 42.0                       |
|                                                    | Piperacillin-tazobactam       | 4                        | 64                | ≤0.25->128  | 82.8                       |
|                                                    | Doripenem                     | 0.03                     | 0.06              | ≤0.008-2    | 99.9                       |
|                                                    | Imipenem                      | 0.25                     | 0.25              | 0.06-8      | 99.6                       |
|                                                    | Meropenem                     | 0.03                     | 0.06              | 0.008-2     | 99.7                       |
|                                                    | Amikacin                      | 4                        | 16                | 0.5->32     | 94.8                       |
|                                                    | Colistin (n=409) <sup>d</sup> | 0.5                      | 1                 | 0.12->4     | 99.8                       |
|                                                    | Tigecycline                   | 0.25                     | 0.5               | 0.06-4      | 99.7                       |
|                                                    | Levofloxacin                  | >4                       | >4                | 0.008->4    | 28.5                       |
| Ceftazidime non-susceptible (382)                  | Ceftazidime-avibactam         | 0.12                     | 0.5               | ≤0.015-32   | 99.5                       |
|                                                    | Ceftazidime                   | 32                       | 128               | 8->128      | 0                          |
|                                                    | Cefepime                      | >16                      | >16               | ≤0.12->16   | 2.6                        |
|                                                    | Aztreonam                     | 64                       | >128              | 2->128      | 1.1                        |
|                                                    | Piperacillin-tazobactam       | 8                        | 64                | 0.5->128    | 76.2                       |
|                                                    | Doripenem                     | 0.03                     | 0.06              | 0.015->4    | 99.2                       |
|                                                    | Imipenem                      | 0.25                     | 0.25              | 0.06-8      | 99.0                       |
|                                                    | Meropenem                     | 0.03                     | 0.06              | 0.015->8    | 99.0                       |
|                                                    | Amikacin                      | 8                        | 16                | 1->32       | 91.6                       |
|                                                    | Colistin (n=243) <sup>d</sup> | 0.5                      | 1                 | ≤0.12-2     | 100                        |
|                                                    | Tigecycline                   | 0.25                     | 0.5               | 0.06-4      | 99.5                       |
|                                                    | Levofloxacin                  | >4                       | >4                | ≤0.03->4    | 5.5                        |
| Ceftazidime non-susceptible, MBL-negative (380)    | Ceftazidime-avibactam         | 0.12                     | 0.5               | ≤0.015-4    | 100                        |
|                                                    | Ceftazidime                   | 32                       | 128               | 8->128      | 0                          |
|                                                    | Cefepime                      | >16                      | >16               | ≤0.12->16   | 2.6                        |
|                                                    | Aztreonam                     | 64                       | >128              | 2->128      | 1.1                        |
|                                                    | Piperacillin-tazobactam       | 8                        | 64                | 0.5->128    | 76.6                       |
|                                                    | Doripenem                     | 0.03                     | 0.06              | 0.015-2     | 99.7                       |
|                                                    | Imipenem                      | 0.25                     | 0.25              | 0.06-8      | 99.5                       |
|                                                    | Meropenem                     | 0.03                     | 0.06              | 0.015-2     | 99.5                       |
|                                                    | Amikacin                      | 8                        | 16                | 1->32       | 91.8                       |
|                                                    | Colistin (n=241) <sup>d</sup> | 0.5                      | 1                 | 0.12-2      | 100                        |
|                                                    | Tigecycline                   | 0.25                     | 0.5               | 0.06-4      | 99.5                       |
|                                                    | Levofloxacin                  | >4                       | >4                | ≤0.03->4    | 5.5                        |
| Meropenem non-susceptible (4)                      | Ceftazidime-avibactam         | — <sup>b</sup>           | —                 | 0.5-32      | 50.0                       |

| Organism, phenotype (no. of isolates) <sup>a</sup> | Antimicrobial agent                         | MIC (µg/ml) <sup>b</sup> |                   |           | % Susceptible <sup>c</sup> |      |
|----------------------------------------------------|---------------------------------------------|--------------------------|-------------------|-----------|----------------------------|------|
|                                                    |                                             | MIC <sub>50</sub>        | MIC <sub>90</sub> | Range     |                            |      |
|                                                    | Ceftazidime                                 | —                        | —                 | 128->128  | 0                          |      |
|                                                    | Cefepime                                    | —                        | —                 | >16->16   | 0                          |      |
|                                                    | Aztreonam                                   | —                        | —                 | 128->128  | 0                          |      |
|                                                    | Piperacillin-tazobactam                     | —                        | —                 | 128->128  | 0                          |      |
|                                                    | Doripenem                                   | —                        | —                 | 1->4      | 25.0                       |      |
|                                                    | Imipenem                                    | —                        | —                 | 0.25-8    | 50.0                       |      |
|                                                    | Meropenem                                   | —                        | —                 | 2->8      | 0.0                        |      |
|                                                    | Amikacin                                    | —                        | —                 | 16-32     | 75.0                       |      |
|                                                    | Colistin (n=4) <sup>d</sup>                 | —                        | —                 | 0.25-1    | 100                        |      |
|                                                    | Tigecycline                                 | —                        | —                 | 0.12-0.5  | 100                        |      |
|                                                    | Levofloxacin                                | —                        | —                 | >4->4     | 0                          |      |
|                                                    | Meropenem non-susceptible, MBL-negative (2) | Ceftazidime-avibactam    | — <sup>b</sup>    | —         | 0.5-2                      | 100  |
|                                                    |                                             | Ceftazidime              | —                 | —         | >128->128                  | 0    |
| Cefepime                                           |                                             | —                        | —                 | >16->16   | 0                          |      |
| Aztreonam                                          |                                             | —                        | —                 | >128->128 | 0                          |      |
| Piperacillin-tazobactam                            |                                             | —                        | —                 | 128->128  | 0                          |      |
| Doripenem                                          |                                             | —                        | —                 | 1-2       | 50.0                       |      |
| Imipenem                                           |                                             | —                        | —                 | 0.25-1    | 100                        |      |
| Meropenem                                          |                                             | —                        | —                 | 2-2       | 0                          |      |
| Amikacin                                           |                                             | —                        | —                 | 16-16     | 100                        |      |
| Colistin (n=2) <sup>d</sup>                        |                                             | —                        | —                 | 0.25-0.5  | 100                        |      |
| Tigecycline                                        |                                             | —                        | —                 | 0.12-0.25 | 100                        |      |
| Levofloxacin                                       |                                             | —                        | —                 | >4->4     | 0                          |      |
| Colistin-resistant (1) <sup>f</sup>                |                                             | Ceftazidime-avibactam    | — <sup>b</sup>    | —         | 0.12                       | 100  |
|                                                    | Ceftazidime                                 | —                        | —                 | 0.5       | 100                        |      |
|                                                    | Cefepime                                    | —                        | —                 | ≤0.12     | 100                        |      |
|                                                    | Aztreonam                                   | —                        | —                 | 0.25      | 100                        |      |
|                                                    | Piperacillin-tazobactam                     | —                        | —                 | 4         | 100                        |      |
|                                                    | Doripenem                                   | —                        | —                 | ≤0.008    | 100                        |      |
|                                                    | Imipenem                                    | —                        | —                 | 0.12      | 100                        |      |
|                                                    | Meropenem                                   | —                        | —                 | 0.03      | 100                        |      |
|                                                    | Amikacin                                    | —                        | —                 | 2         | 100                        |      |
|                                                    | Colistin (n=1) <sup>d</sup>                 | —                        | —                 | >4        | 0                          |      |
|                                                    | Tigecycline                                 | —                        | —                 | 0.12      | 100                        |      |
|                                                    | Levofloxacin                                | —                        | —                 | 1         | 100                        |      |
|                                                    | Multidrug-resistant (348)                   | Ceftazidime-avibactam    | 0.25              | 0.5       | ≤0.015-32                  | 99.4 |
| Ceftazidime                                        |                                             | 32                       | >128              | 0.25->128 | 1.2                        |      |
| Cefepime                                           |                                             | >16                      | >16               | 0.5->16   | 0.3                        |      |
| Aztreonam                                          |                                             | 64                       | >128              | 0.12->128 | 0.3                        |      |
| Piperacillin-tazobactam                            |                                             | 8                        | 128               | 0.5->128  | 74.7                       |      |
| Doripenem                                          |                                             | 0.03                     | 0.06              | 0.015->4  | 99.1                       |      |
| Imipenem                                           |                                             | 0.25                     | 0.25              | 0.06-8    | 99.1                       |      |
| Meropenem                                          |                                             | 0.03                     | 0.06              | 0.015->8  | 98.9                       |      |
| Amikacin                                           |                                             | 8                        | 16                | 1->32     | 91.1                       |      |
| Colistin (n=217) <sup>d</sup>                      |                                             | 0.5                      | 1                 | ≤0.12-2   | 100                        |      |
| Tigecycline                                        |                                             | 0.25                     | 0.5               | 0.06-4    | 99.7                       |      |
| Levofloxacin                                       |                                             | >4                       | >4                | ≤0.03->4  | 0.6                        |      |
| Multidrug-resistant, MBL-negative (346)            |                                             | Ceftazidime-avibactam    | 0.12              | 0.5       | ≤0.015-4                   | 100  |
|                                                    | Ceftazidime                                 | 32                       | >128              | 0.25->128 | 1.2                        |      |
|                                                    | Cefepime                                    | >16                      | >16               | 0.5->16   | 0.3                        |      |
|                                                    | Aztreonam                                   | 64                       | >128              | 0.12->128 | 0.3                        |      |
|                                                    | Piperacillin-tazobactam                     | 8                        | 64                | 0.5->128  | 75.1                       |      |
|                                                    | Doripenem                                   | 0.03                     | 0.06              | 0.015-2   | 99.7                       |      |
|                                                    | Imipenem                                    | 0.25                     | 0.25              | 0.06-2    | 99.7                       |      |
|                                                    | Meropenem                                   | 0.03                     | 0.06              | 0.015-2   | 99.4                       |      |
|                                                    | Amikacin                                    | 8                        | 16                | 1->32     | 91.3                       |      |
|                                                    | Colistin (n=215) <sup>d</sup>               | 0.5                      | 1                 | 0.12-2    | 100                        |      |
|                                                    | Tigecycline                                 | 0.25                     | 0.5               | 0.06-4    | 99.7                       |      |
|                                                    | Levofloxacin                                | >4                       | >4                | ≤0.03->4  | 0.6                        |      |

| Organism, phenotype (no. of isolates) <sup>a</sup> | Antimicrobial agent           | MIC (µg/ml) <sup>b</sup> |                   |             | % Susceptible <sup>c</sup> |
|----------------------------------------------------|-------------------------------|--------------------------|-------------------|-------------|----------------------------|
|                                                    |                               | MIC <sub>50</sub>        | MIC <sub>90</sub> | Range       |                            |
| <i>Klebsiella pneumoniae</i>                       |                               |                          |                   |             |                            |
| All (510)                                          |                               |                          |                   |             |                            |
|                                                    | Ceftazidime-avibactam         | 0.12                     | 0.5               | ≤0.015->128 | 99.2                       |
|                                                    | Ceftazidime                   | 0.25                     | 64                | 0.03->128   | 57.5                       |
|                                                    | Cefepime                      | ≤0.12                    | >16               | ≤0.12->16   | 59.2                       |
|                                                    | Aztreonam                     | 0.12                     | 64                | ≤0.015->128 | 58.0                       |
|                                                    | Piperacillin-tazobactam       | 4                        | 64                | ≤0.25->128  | 81.4                       |
|                                                    | Doripenem                     | 0.06                     | 0.12              | 0.03->4     | 98.6                       |
|                                                    | Imipenem                      | 0.25                     | 0.5               | 0.06->8     | 98.6                       |
|                                                    | Meropenem                     | 0.03                     | 0.06              | 0.015->8    | 98.6                       |
|                                                    | Amikacin                      | 2                        | 8                 | 0.5->32     | 97.5                       |
|                                                    | Colistin (n=344) <sup>d</sup> | 1                        | 1                 | 0.25->4     | 97.4                       |
|                                                    | Tigecycline                   | 0.5                      | 2                 | 0.06-8      | 95.5                       |
|                                                    | Levofloxacin                  | 0.25                     | >4                | ≤0.03->4    | 83.3                       |
| All, MBL-negative (506)                            |                               |                          |                   |             |                            |
|                                                    | Ceftazidime-avibactam         | 0.12                     | 0.5               | ≤0.015-8    | 100                        |
|                                                    | Ceftazidime                   | 0.25                     | 64                | 0.03->128   | 57.9                       |
|                                                    | Cefepime                      | ≤0.12                    | >16               | ≤0.12->16   | 59.7                       |
|                                                    | Aztreonam                     | 0.12                     | 64                | ≤0.015->128 | 57.9                       |
|                                                    | Piperacillin-tazobactam       | 4                        | 64                | ≤0.25->128  | 82.0                       |
|                                                    | Doripenem                     | 0.06                     | 0.12              | 0.03->4     | 99.4                       |
|                                                    | Imipenem                      | 0.25                     | 0.5               | 0.06->8     | 99.4                       |
|                                                    | Meropenem                     | 0.03                     | 0.06              | 0.015->8    | 99.4                       |
|                                                    | Amikacin                      | 2                        | 4                 | 0.5->32     | 98.2                       |
|                                                    | Colistin (n=340) <sup>d</sup> | 1                        | 1                 | 0.25->4     | 98.5                       |
|                                                    | Tigecycline                   | 0.5                      | 2                 | 0.06-8      | 95.7                       |
|                                                    | Levofloxacin                  | 0.25                     | >4                | ≤0.03->4    | 83.6                       |
| Ceftazidime non-susceptible (217)                  |                               |                          |                   |             |                            |
|                                                    | Ceftazidime-avibactam         | 0.25                     | 0.5               | ≤0.015->128 | 98.2                       |
|                                                    | Ceftazidime                   | 32                       | 128               | 8->128      | 0                          |
|                                                    | Cefepime                      | 16                       | >16               | ≤0.12->16   | 6.0                        |
|                                                    | Aztreonam                     | 64                       | 128               | 0.25->128   | 2.8                        |
|                                                    | Piperacillin-tazobactam       | 16                       | >128              | 0.5->128    | 61.3                       |
|                                                    | Doripenem                     | 0.06                     | 0.12              | 0.03->4     | 96.8                       |
|                                                    | Imipenem                      | 0.25                     | 0.5               | 0.12->8     | 97.2                       |
|                                                    | Meropenem                     | 0.06                     | 0.12              | 0.03->8     | 96.8                       |
|                                                    | Amikacin                      | 4                        | 8                 | 0.5->32     | 94.0                       |
|                                                    | Colistin (n=143) <sup>d</sup> | 1                        | 2                 | 0.25->4     | 94.4                       |
|                                                    | Tigecycline                   | 1                        | 2                 | 0.12-8      | 91.2                       |
|                                                    | Levofloxacin                  | 1                        | >4                | ≤0.03->4    | 66.8                       |
| Ceftazidime non-susceptible (213)                  |                               |                          |                   |             |                            |
|                                                    | Ceftazidime-avibactam         | 0.25                     | 0.5               | ≤0.015-8    | 100                        |
|                                                    | Ceftazidime                   | 32                       | 128               | 8->128      | 0                          |
|                                                    | Cefepime                      | 16                       | >16               | ≤0.12->16   | 6.1                        |
|                                                    | Aztreonam                     | 64                       | 128               | 2->128      | 1.4                        |
|                                                    | Piperacillin-tazobactam       | 16                       | 128               | 0.5->128    | 62.4                       |
|                                                    | Doripenem                     | 0.06                     | 0.12              | 0.03->4     | 98.6                       |
|                                                    | Imipenem                      | 0.25                     | 0.5               | 0.12->8     | 99.1                       |
|                                                    | Meropenem                     | 0.06                     | 0.12              | 0.03->8     | 98.6                       |
|                                                    | Amikacin                      | 4                        | 8                 | 0.5->32     | 95.8                       |
|                                                    | Colistin (n=139) <sup>d</sup> | 1                        | 1                 | 0.25->4     | 97.1                       |
|                                                    | Tigecycline                   | 1                        | 2                 | 0.12-8      | 91.6                       |
|                                                    | Levofloxacin                  | 1                        | >4                | ≤0.03->4    | 67.1                       |
| Meropenem non-susceptible (7)                      |                               |                          |                   |             |                            |
|                                                    | Ceftazidime-avibactam         | — <sup>b</sup>           | —                 | 0.25->128   | 42.9                       |
|                                                    | Ceftazidime                   | —                        | —                 | 64->128     | 0                          |
|                                                    | Cefepime                      | —                        | —                 | >16->16     | 0                          |
|                                                    | Aztreonam                     | —                        | —                 | 0.25->128   | 42.9                       |
|                                                    | Piperacillin-tazobactam       | —                        | —                 | 128->128    | 0                          |
|                                                    | Doripenem                     | —                        | —                 | 2->4        | 0                          |
|                                                    | Imipenem                      | —                        | —                 | 1->8        | 14.3                       |
|                                                    | Meropenem                     | —                        | —                 | 4->8        | 0                          |
|                                                    | Amikacin                      | —                        | —                 | 4->32       | 42.9                       |
|                                                    | Colistin (n=6) <sup>d</sup>   | —                        | —                 | 1->4        | 16.7                       |
|                                                    | Tigecycline                   | —                        | —                 | 0.25-4      | 71.4                       |



| Organism, phenotype (no. of isolates) <sup>a</sup> | Antimicrobial agent                    | MIC (µg/ml) <sup>b</sup> |                   |           | % Susceptible <sup>c</sup> |      |
|----------------------------------------------------|----------------------------------------|--------------------------|-------------------|-----------|----------------------------|------|
|                                                    |                                        | MIC <sub>50</sub>        | MIC <sub>90</sub> | Range     |                            |      |
|                                                    | Levofloxacin                           | —                        | —                 | 0.5->4    | 28.6                       |      |
| Meropenem non-susceptible, MBL-negative (3)        | Ceftazidime-avibactam                  | 1                        | 8                 | 0.25-8    | 100                        |      |
|                                                    | Ceftazidime                            | >128                     | >128              | 128->128  | 0                          |      |
|                                                    | Cefepime                               | >16                      | >16               | >16->16   | 0                          |      |
|                                                    | Aztreonam                              | 128                      | >128              | 128->128  | 0                          |      |
|                                                    | Piperacillin-tazobactam                | >128                     | >128              | 128->128  | 0                          |      |
|                                                    | Doripenem                              | 4                        | >4                | 2->4      | 0                          |      |
|                                                    | Imipenem                               | 2                        | >8                | 1->8      | 33.3                       |      |
|                                                    | Meropenem                              | 8                        | >8                | 4->8      | 0                          |      |
|                                                    | Amikacin                               | 8                        | 16                | 4-16      | 100                        |      |
|                                                    | Colistin (n=2) <sup>d</sup>            | 1                        | >4                | 1->4      | 50.0                       |      |
|                                                    | Tigecycline                            | 0.5                      | 4                 | 0.25-4    | 66.7                       |      |
|                                                    | Levofloxacin                           | >4                       | >4                | >4->4     | 0                          |      |
| Colistin-resistant (9)                             | Ceftazidime-avibactam                  | — <sup>b</sup>           | —                 | 0.03->128 | 55.6                       |      |
|                                                    | Ceftazidime                            | —                        | —                 | 0.25->128 | 11.1                       |      |
|                                                    | Cefepime                               | —                        | —                 | ≤0.12->16 | 33.3                       |      |
|                                                    | Aztreonam                              | —                        | —                 | 0.06->128 | 44.4                       |      |
|                                                    | Piperacillin-tazobactam                | —                        | —                 | 2->128    | 33.3                       |      |
|                                                    | Doripenem                              | —                        | —                 | 0.03->4   | 44.4                       |      |
|                                                    | Imipenem                               | —                        | —                 | 0.12->8   | 44.4                       |      |
|                                                    | Meropenem                              | —                        | —                 | 0.03->8   | 44.4                       |      |
|                                                    | Amikacin                               | —                        | —                 | 2->32     | 33.3                       |      |
|                                                    | Colistin (n=9) <sup>d</sup>            | —                        | —                 | 4->4      | 0                          |      |
|                                                    | Tigecycline                            | —                        | —                 | 0.25-4    | 88.9                       |      |
|                                                    | Levofloxacin                           | —                        | —                 | 0.5->4    | 44.4                       |      |
|                                                    | Colistin-resistant, MBL-negative (5)   | Ceftazidime-avibactam    | 0.25              | 1         | 0.03-1                     | 100  |
|                                                    |                                        | Ceftazidime              | 64                | >128      | 0.25->128                  | 20.0 |
| Cefepime                                           |                                        | 2                        | >16               | ≤0.12->16 | 60.0                       |      |
| Aztreonam                                          |                                        | 128                      | 128               | 0.06-128  | 20.0                       |      |
| Piperacillin-tazobactam                            |                                        | 8                        | >128              | 2->128    | 60.0                       |      |
| Doripenem                                          |                                        | 0.06                     | 4                 | 0.03-4    | 80.0                       |      |
| Imipenem                                           |                                        | 0.5                      | 2                 | 0.12-2    | 80.0                       |      |
| Meropenem                                          |                                        | 0.06                     | 4                 | 0.03-4    | 80.0                       |      |
| Amikacin                                           |                                        | 4                        | >32               | 2->32     | 60.0                       |      |
| Colistin (n=5) <sup>d</sup>                        |                                        | 4                        | >4                | 4->4      | 0                          |      |
| Tigecycline                                        |                                        | 1                        | 2                 | 0.25-2    | 100                        |      |
| Levofloxacin                                       |                                        | >4                       | >4                | 2->4      | 40.0                       |      |
| Multidrug-resistant (63)                           |                                        | Ceftazidime-avibactam    | 0.5               | 2         | 0.03->128                  | 93.7 |
|                                                    | Ceftazidime                            | 64                       | >128              | 16->128   | 0                          |      |
|                                                    | Cefepime                               | >16                      | >16               | 1->16     | 3.2                        |      |
|                                                    | Aztreonam                              | 128                      | >128              | 0.25->128 | 4.8                        |      |
|                                                    | Piperacillin-tazobactam                | 128                      | >128              | 4->128    | 22.2                       |      |
|                                                    | Doripenem                              | 0.06                     | 2                 | 0.03->4   | 88.9                       |      |
|                                                    | Imipenem                               | 0.25                     | 1                 | 0.12->8   | 90.5                       |      |
|                                                    | Meropenem                              | 0.06                     | 4                 | 0.03->8   | 88.9                       |      |
|                                                    | Amikacin                               | 4                        | 32                | 0.5->32   | 84.1                       |      |
|                                                    | Colistin (n=41) <sup>d</sup>           | 1                        | >4                | 0.25->4   | 80.5                       |      |
|                                                    | Tigecycline                            | 1                        | 4                 | 0.25-8    | 76.2                       |      |
|                                                    | Levofloxacin                           | >4                       | >4                | 0.06->4   | 14.3                       |      |
|                                                    | Multidrug-resistant, MBL-negative (59) | Ceftazidime-avibactam    | 0.5               | 1         | 0.03-8                     | 100  |
|                                                    |                                        | Ceftazidime              | 64                | >128      | 16->128                    | 0    |
|                                                    |                                        | Cefepime                 | >16               | >16       | 1->16                      | 3.4  |
| Aztreonam                                          |                                        | 128                      | >128              | 16->128   | 0                          |      |
| Piperacillin-tazobactam                            |                                        | 64                       | >128              | 4->128    | 23.7                       |      |
| Doripenem                                          |                                        | 0.06                     | 0.25              | 0.03->4   | 94.9                       |      |
| Imipenem                                           |                                        | 0.25                     | 0.5               | 0.12->8   | 96.6                       |      |
| Meropenem                                          |                                        | 0.06                     | 0.25              | 0.03->8   | 94.9                       |      |
| Amikacin                                           |                                        | 4                        | 32                | 0.5->32   | 89.8                       |      |
| Colistin (n=37) <sup>d</sup>                       |                                        | 1                        | 4                 | 0.25->4   | 89.2                       |      |

| Organism, phenotype (no. of isolates) <sup>a</sup> | Antimicrobial agent           | MIC (µg/ml) <sup>b</sup> |                   |             | % Susceptible <sup>c</sup> |
|----------------------------------------------------|-------------------------------|--------------------------|-------------------|-------------|----------------------------|
|                                                    |                               | MIC <sub>50</sub>        | MIC <sub>90</sub> | Range       |                            |
|                                                    | Tigecycline                   | 1                        | 4                 | 0.25–8      | 76.3                       |
|                                                    | Levofloxacin                  | >4                       | >4                | 0.06–>4     | 11.9                       |
| <i>Klebsiella oxytoca</i> <sup>g,h</sup>           |                               |                          |                   |             |                            |
| All (98) <sup>f</sup>                              | Ceftazidime-avibactam         | 0.12                     | 0.25              | ≤0.015–1    | 100                        |
|                                                    | Ceftazidime                   | 0.12                     | 8                 | 0.03–>128   | 87.8                       |
|                                                    | Cefepime                      | ≤0.12                    | 4                 | ≤0.12–>16   | 89.8                       |
|                                                    | Aztreonam                     | 0.12                     | 32                | ≤0.015–>128 | 85.7                       |
|                                                    | Piperacillin-tazobactam       | 2                        | 8                 | 0.5–>128    | 94.9                       |
|                                                    | Doripenem                     | 0.06                     | 0.06              | 0.03–0.25   | 100                        |
|                                                    | Imipenem                      | 0.25                     | 0.5               | 0.06–1      | 100                        |
|                                                    | Meropenem                     | 0.03                     | 0.06              | 0.03–0.25   | 100                        |
|                                                    | Amikacin                      | 2                        | 4                 | 0.5–>32     | 99.0                       |
|                                                    | Colistin (n=62) <sup>d</sup>  | 1                        | 1                 | 0.25–2      | 100                        |
|                                                    | Tigecycline                   | 0.25                     | 1                 | 0.06–2      | 100                        |
|                                                    | Levofloxacin                  | 0.06                     | 4                 | ≤0.03–>4    | 88.8                       |
| Ceftazidime non-susceptible (12) <sup>f</sup>      | Ceftazidime-avibactam         | 0.12                     | 0.5               | 0.03–1      | 100                        |
|                                                    | Ceftazidime                   | 16                       | 128               | 8–>128      | 0                          |
|                                                    | Cefepime                      | 4                        | >16               | ≤0.12–>16   | 33.3                       |
|                                                    | Aztreonam                     | 32                       | 128               | 16–>128     | 0                          |
|                                                    | Piperacillin-tazobactam       | 8                        | 128               | 4–>128      | 66.7                       |
|                                                    | Doripenem                     | 0.06                     | 0.06              | 0.03–0.25   | 100                        |
|                                                    | Imipenem                      | 0.25                     | 0.25              | 0.12–1      | 100                        |
|                                                    | Meropenem                     | 0.06                     | 0.12              | 0.03–0.25   | 100                        |
|                                                    | Amikacin                      | 8                        | 16                | 2–>32       | 91.7                       |
|                                                    | Colistin (n=10) <sup>d</sup>  | 0.5                      | 2                 | 0.5–2       | 100                        |
|                                                    | Tigecycline                   | 0.5                      | 1                 | 0.25–2      | 100                        |
|                                                    | Levofloxacin                  | >4                       | >4                | 0.06–>4     | 33.3                       |
| Multidrug-resistant (3) <sup>f</sup>               | Ceftazidime-avibactam         | — <sup>b</sup>           | —                 | 0.03–1      | 100                        |
|                                                    | Ceftazidime                   | —                        | —                 | 32–>128     | 0                          |
|                                                    | Cefepime                      | —                        | —                 | 2–>16       | 33.3                       |
|                                                    | Aztreonam                     | —                        | —                 | 64–>128     | 0                          |
|                                                    | Piperacillin-tazobactam       | —                        | —                 | 8–128       | 33.3                       |
|                                                    | Doripenem                     | —                        | —                 | 0.03–0.06   | 100                        |
|                                                    | Imipenem                      | —                        | —                 | 0.12–0.25   | 100                        |
|                                                    | Meropenem                     | —                        | —                 | 0.03–0.06   | 100                        |
|                                                    | Amikacin                      | —                        | —                 | 8–>32       | 66.7                       |
|                                                    | Colistin (n=3) <sup>d</sup>   | —                        | —                 | 0.5–2       | 100                        |
|                                                    | Tigecycline                   | —                        | —                 | 1–1         | 100                        |
|                                                    | Levofloxacin                  | —                        | —                 | >4–>4       | 0                          |
| <i>Enterobacter</i> spp.                           |                               |                          |                   |             |                            |
| All (225) <sup>i</sup>                             | Ceftazidime-avibactam         | 0.25                     | 0.5               | 0.03–128    | 98.7                       |
|                                                    | Ceftazidime                   | 0.5                      | 128               | 0.03–>128   | 69.3                       |
|                                                    | Cefepime                      | ≤0.12                    | 4                 | ≤0.12–>16   | 84.4                       |
|                                                    | Aztreonam                     | 0.12                     | 64                | ≤0.015–>128 | 71.1                       |
|                                                    | Piperacillin-tazobactam       | 4                        | 128               | 0.5–>128    | 80.0                       |
|                                                    | Doripenem                     | 0.06                     | 0.25              | 0.015–>4    | 96.0                       |
|                                                    | Imipenem                      | 0.5                      | 2                 | 0.12–8      | 84.4                       |
|                                                    | Meropenem                     | 0.06                     | 0.12              | 0.015–8     | 96.4                       |
|                                                    | Amikacin                      | 2                        | 4                 | ≤0.25–>32   | 96.9                       |
|                                                    | Colistin (n=138) <sup>d</sup> | 0.5                      | 4                 | ≤0.12–>4    | 89.1                       |
|                                                    | Tigecycline                   | 0.5                      | 1                 | 0.06–4      | 98.2                       |
|                                                    | Levofloxacin                  | 0.06                     | 2                 | ≤0.03–>4    | 90.2                       |
| All, MBL-negative (221)                            | Ceftazidime-avibactam         | 0.25                     | 0.5               | 0.03–4      | 100                        |
|                                                    | Ceftazidime                   | 0.5                      | 128               | 0.03–>128   | 70.1                       |
|                                                    | Cefepime                      | ≤0.12                    | 4                 | ≤0.12–>16   | 85.5                       |
|                                                    | Aztreonam                     | 0.12                     | 64                | ≤0.015–>128 | 70.6                       |
|                                                    | Piperacillin-tazobactam       | 4                        | 128               | 0.5–>128    | 81.0                       |
|                                                    | Doripenem                     | 0.06                     | 0.25              | 0.015–>4    | 97.7                       |
|                                                    | Imipenem                      | 0.5                      | 2                 | 0.12–8      | 86.0                       |

| Organism, phenotype (no. of isolates) <sup>a</sup> | Antimicrobial agent           | MIC (µg/ml) <sup>b</sup> |                   |            | % Susceptible <sup>c</sup> |
|----------------------------------------------------|-------------------------------|--------------------------|-------------------|------------|----------------------------|
|                                                    |                               | MIC <sub>50</sub>        | MIC <sub>90</sub> | Range      |                            |
|                                                    | Meropenem                     | 0.06                     | 0.12              | 0.015–8    | 97.7                       |
|                                                    | Amikacin                      | 2                        | 4                 | ≤0.25–>32  | 97.3                       |
|                                                    | Colistin (n=135) <sup>d</sup> | 0.5                      | 4                 | ≤0.12–>4   | 88.9                       |
|                                                    | Tigecycline                   | 0.5                      | 1                 | 0.06–4     | 98.2                       |
|                                                    | Levofloxacin                  | 0.06                     | 2                 | ≤0.03–>4   | 90.0                       |
| Ceftazidime non-susceptible (69)                   | Ceftazidime-avibactam         | 0.5                      | 2                 | 0.03–128   | 95.7                       |
|                                                    | Ceftazidime                   | 64                       | >128              | 8–>128     | 0                          |
|                                                    | Cefepime                      | 2                        | >16               | ≤0.12–>16  | 52.2                       |
|                                                    | Aztreonam                     | 64                       | >128              | 0.06–>128  | 7.3                        |
|                                                    | Piperacillin-tazobactam       | 64                       | >128              | 2–>128     | 36.2                       |
|                                                    | Doripenem                     | 0.12                     | 4                 | 0.015–>4   | 88.4                       |
|                                                    | Imipenem                      | 0.5                      | 4                 | 0.12–8     | 87.0                       |
|                                                    | Meropenem                     | 0.12                     | 2                 | 0.015–8    | 88.4                       |
|                                                    | Amikacin                      | 2                        | 32                | ≤0.25–>32  | 89.9                       |
|                                                    | Colistin (n=39) <sup>d</sup>  | 0.5                      | 1                 | 0.25–>4    | 97.4                       |
|                                                    | Tigecycline                   | 0.5                      | 2                 | 0.25–4     | 94.2                       |
|                                                    | Levofloxacin                  | 0.25                     | >4                | ≤0.03–>4   | 75.4                       |
| Ceftazidime non-susceptible, MBL-negative (66)     | Ceftazidime-avibactam         | 0.5                      | 1                 | 0.03–4     | 100                        |
|                                                    | Ceftazidime                   | 64                       | >128              | 8–>128     | 0                          |
|                                                    | Cefepime                      | 2                        | >16               | ≤0.12–>16  | 53.0                       |
|                                                    | Aztreonam                     | 64                       | >128              | 2–>128     | 3.0                        |
|                                                    | Piperacillin-tazobactam       | 32                       | >128              | 2–>128     | 37.9                       |
|                                                    | Doripenem                     | 0.12                     | 0.25              | 0.015–>4   | 92.4                       |
|                                                    | Imipenem                      | 0.5                      | 1                 | 0.12–8     | 90.9                       |
|                                                    | Meropenem                     | 0.06                     | 0.5               | 0.015–8    | 92.4                       |
|                                                    | Amikacin                      | 2                        | 16                | ≤0.25–>32  | 90.9                       |
|                                                    | Colistin (n=36) <sup>d</sup>  | 0.5                      | 1                 | 0.25–>4    | 97.2                       |
|                                                    | Tigecycline                   | 0.5                      | 2                 | 0.25–4     | 93.9                       |
|                                                    | Levofloxacin                  | 0.12                     | >4                | ≤0.03–>4   | 74.2                       |
| Meropenem non-susceptible (8)                      | Ceftazidime-avibactam         | — <sup>b</sup>           | —                 | 0.5–128    | 62.5                       |
|                                                    | Ceftazidime                   | —                        | —                 | 8–>128     | 0                          |
|                                                    | Cefepime                      | —                        | —                 | 1–>16      | 25.0                       |
|                                                    | Aztreonam                     | —                        | —                 | 0.06–>128  | 37.5                       |
|                                                    | Piperacillin-tazobactam       | —                        | —                 | 16–>128    | 12.5                       |
|                                                    | Doripenem                     | —                        | —                 | 2–>4       | 0                          |
|                                                    | Imipenem                      | —                        | —                 | 4–8        | 0                          |
|                                                    | Meropenem                     | —                        | —                 | 2–8        | 0                          |
|                                                    | Amikacin                      | —                        | —                 | 1–32       | 87.5                       |
|                                                    | Colistin (n=7) <sup>d</sup>   | —                        | —                 | 0.5–1      | 100                        |
|                                                    | Tigecycline                   | —                        | —                 | 0.5–4      | 87.5                       |
|                                                    | Levofloxacin                  | —                        | —                 | 0.12–>4    | 75.0                       |
| Meropenem non-susceptible (5)                      | Ceftazidime-avibactam         | — <sup>b</sup>           | —                 | 0.5–2      | 100                        |
|                                                    | Ceftazidime                   | —                        | —                 | 8–>128     | 0                          |
|                                                    | Cefepime                      | —                        | —                 | 1–>16      | 20.0                       |
|                                                    | Aztreonam                     | —                        | —                 | 8–>128     | 0                          |
|                                                    | Piperacillin-tazobactam       | —                        | —                 | 16–>128    | 20.0                       |
|                                                    | Doripenem                     | —                        | —                 | 2–>4       | 0                          |
|                                                    | Imipenem                      | —                        | —                 | 4–8        | 0                          |
|                                                    | Meropenem                     | —                        | —                 | 2–8        | 0                          |
|                                                    | Amikacin                      | —                        | —                 | 1–8        | 100                        |
|                                                    | Colistin (n=4) <sup>d</sup>   | —                        | —                 | 0.5–1      | 100                        |
|                                                    | Tigecycline                   | —                        | —                 | 0.5–4      | 80.0                       |
|                                                    | Levofloxacin                  | —                        | —                 | 0.12–>4    | 60.0                       |
| Colistin-resistant (15) <sup>f</sup>               | Ceftazidime-avibactam         | 0.12                     | 0.25              | 0.06–0.5   | 100                        |
|                                                    | Ceftazidime                   | 0.25                     | 0.5               | 0.12–8     | 93.3                       |
|                                                    | Cefepime                      | ≤0.12                    | ≤0.12             | ≤0.12–0.25 | 100                        |
|                                                    | Aztreonam                     | 0.12                     | 0.5               | 0.06–2     | 100                        |
|                                                    | Piperacillin-tazobactam       | 2                        | 4                 | 0.5–8      | 100                        |
|                                                    | Doripenem                     | 0.06                     | 0.12              | 0.03–0.25  | 100                        |

| Organism, phenotype (no. of isolates) <sup>a</sup> | Antimicrobial agent          | MIC (µg/ml) <sup>b</sup> |                   |             | % Susceptible <sup>c</sup> |
|----------------------------------------------------|------------------------------|--------------------------|-------------------|-------------|----------------------------|
|                                                    |                              | MIC <sub>50</sub>        | MIC <sub>90</sub> | Range       |                            |
|                                                    | Imipenem                     | 1                        | 2                 | 0.5–2       | 80.0                       |
|                                                    | Meropenem                    | 0.06                     | 0.12              | 0.03–0.12   | 100                        |
|                                                    | Amikacin                     | 2                        | 2                 | 1–4         | 100                        |
|                                                    | Colistin (n=15) <sup>d</sup> | >4                       | >4                | 4–>4        | 0                          |
|                                                    | Tigecycline                  | 0.5                      | 1                 | 0.5–1       | 100                        |
|                                                    | Levofloxacin                 | 0.12                     | 0.12              | 0.06–0.25   | 100                        |
| Multidrug-resistant (14)                           | Ceftazidime-avibactam        | 1                        | 2                 | 0.25–128    | 92.9                       |
|                                                    | Ceftazidime                  | 128                      | >128              | 32–>128     | 0                          |
|                                                    | Cefepime                     | >16                      | >16               | 0.25–>16    | 7.1                        |
|                                                    | Aztreonam                    | 128                      | >128              | 0.12–>128   | 7.1                        |
|                                                    | Piperacillin-tazobactam      | 128                      | >128              | 8–>128      | 28.6                       |
|                                                    | Doripenem                    | 0.25                     | 4                 | 0.03–>4     | 64.3                       |
|                                                    | Imipenem                     | 1                        | 4                 | 0.25–8      | 64.3                       |
|                                                    | Meropenem                    | 0.12                     | 8                 | 0.015–8     | 64.3                       |
|                                                    | Amikacin                     | 4                        | >32               | 2–>32       | 71.4                       |
|                                                    | Colistin (n=8) <sup>d</sup>  | — <sup>b</sup>           | —                 | 0.25–1      | 100                        |
|                                                    | Tigecycline                  | 1                        | 4                 | 0.25–4      | 78.6                       |
|                                                    | Levofloxacin                 | 4                        | >4                | 0.5–>4      | 28.6                       |
| Multidrug-resistant, MBL-negative (13)             | Ceftazidime-avibactam        | 1                        | 2                 | 0.25–2      | 100                        |
|                                                    | Ceftazidime                  | 128                      | >128              | 32–>128     | 0                          |
|                                                    | Cefepime                     | >16                      | >16               | 0.25–>16    | 7.7                        |
|                                                    | Aztreonam                    | 128                      | >128              | 32–>128     | 0                          |
|                                                    | Piperacillin-tazobactam      | >128                     | >128              | 8–>128      | 30.8                       |
|                                                    | Doripenem                    | 0.25                     | 4                 | 0.03–>4     | 69.2                       |
|                                                    | Imipenem                     | 1                        | 4                 | 0.25–8      | 69.2                       |
|                                                    | Meropenem                    | 0.12                     | 8                 | 0.015–8     | 69.2                       |
|                                                    | Amikacin                     | 4                        | >32               | 2–>32       | 76.9                       |
|                                                    | Colistin (n=7) <sup>d</sup>  | — <sup>b</sup>           | —                 | 0.25–1      | 100                        |
|                                                    | Tigecycline                  | 2                        | 4                 | 0.25–4      | 76.9                       |
|                                                    | Levofloxacin                 | >4                       | >4                | 1–>4        | 23.1                       |
| <i>Citrobacter</i> spp. <sup>h</sup>               |                              |                          |                   |             |                            |
| All (84) <sup>i</sup>                              | Ceftazidime-avibactam        | 0.12                     | 0.5               | ≤0.015–128  | 97.6                       |
|                                                    | Ceftazidime                  | 0.5                      | 128               | 0.06–>128   | 73.8                       |
|                                                    | Cefepime                     | ≤0.12                    | 4                 | ≤0.12–>16   | 89.3                       |
|                                                    | Aztreonam                    | 0.12                     | 64                | ≤0.015–>128 | 76.2                       |
|                                                    | Piperacillin-tazobactam      | 4                        | 64                | 0.5–>128    | 84.5                       |
|                                                    | Doripenem                    | 0.06                     | 0.06              | 0.015–>4    | 98.8                       |
|                                                    | Imipenem                     | 0.5                      | 1                 | 0.06–4      | 92.9                       |
|                                                    | Meropenem                    | 0.03                     | 0.06              | 0.015–8     | 98.8                       |
|                                                    | Amikacin                     | 2                        | 4                 | 0.5–>32     | 94.1                       |
|                                                    | Colistin (n=58) <sup>d</sup> | 0.5                      | 1                 | ≤0.12–2     | 100                        |
|                                                    | Tigecycline                  | 0.25                     | 0.5               | 0.06–2      | 100                        |
|                                                    | Levofloxacin                 | 0.06                     | 2                 | ≤0.03–>4    | 91.7                       |
| All, MBL-negative (83)                             | Ceftazidime-avibactam        | 0.12                     | 0.25              | ≤0.015–128  | 98.8                       |
|                                                    | Ceftazidime                  | 0.5                      | 128               | 0.06–>128   | 74.7                       |
|                                                    | Cefepime                     | ≤0.12                    | 2                 | ≤0.12–>16   | 90.4                       |
|                                                    | Aztreonam                    | 0.12                     | 64                | ≤0.015–>128 | 77.1                       |
|                                                    | Piperacillin-tazobactam      | 4                        | 32                | 0.5–128     | 85.5                       |
|                                                    | Doripenem                    | 0.06                     | 0.06              | 0.015–1     | 100                        |
|                                                    | Imipenem                     | 0.5                      | 1                 | 0.06–4      | 94.0                       |
|                                                    | Meropenem                    | 0.03                     | 0.06              | 0.015–0.5   | 100                        |
|                                                    | Amikacin                     | 2                        | 4                 | 0.5–>32     | 94.0                       |
|                                                    | Colistin (n=57) <sup>d</sup> | 0.5                      | 1                 | 0.12–2      | 100                        |
|                                                    | Tigecycline                  | 0.25                     | 0.5               | 0.06–1      | 100                        |
|                                                    | Levofloxacin                 | 0.06                     | 2                 | ≤0.03–>4    | 92.8                       |
| Ceftazidime non-susceptible (22)                   | Ceftazidime-avibactam        | 0.25                     | 4                 | 0.12–128    | 90.9                       |
|                                                    | Ceftazidime                  | 128                      | >128              | 8–>128      | 0                          |
|                                                    | Cefepime                     | 2                        | >16               | 0.25–>16    | 59.1                       |
|                                                    | Aztreonam                    | 32                       | 128               | 0.06–>128   | 9.1                        |

| Organism, phenotype (no. of isolates) <sup>a</sup> | Antimicrobial agent                                 | MIC (µg/ml) <sup>b</sup> |                   |           | % Susceptible <sup>c</sup> |
|----------------------------------------------------|-----------------------------------------------------|--------------------------|-------------------|-----------|----------------------------|
|                                                    |                                                     | MIC <sub>50</sub>        | MIC <sub>90</sub> | Range     |                            |
|                                                    | Piperacillin-tazobactam                             | 32                       | 64                | 4->128    | 40.9                       |
|                                                    | Doripenem                                           | 0.06                     | 0.25              | 0.03->4   | 95.5                       |
|                                                    | Imipenem                                            | 0.5                      | 2                 | 0.12-4    | 86.4                       |
|                                                    | Meropenem                                           | 0.03                     | 0.25              | 0.015-8   | 95.5                       |
|                                                    | Amikacin                                            | 2                        | >32               | 0.5->32   | 77.3                       |
|                                                    | Colistin (n=13) <sup>d</sup>                        | 1                        | 1                 | 0.25-2    | 100                        |
|                                                    | Tigecycline                                         | 0.25                     | 1                 | 0.12-2    | 100                        |
|                                                    | Levofloxacin                                        | 0.5                      | >4                | 0.06->4   | 72.7                       |
| Ceftazidime non-susceptible, MBL-negative (21)     | Ceftazidime-avibactam                               | 0.25                     | 0.5               | 0.12-128  | 95.2                       |
|                                                    | Ceftazidime                                         | 128                      | >128              | 8->128    | 0                          |
|                                                    | Cefepime                                            | 2                        | >16               | 0.25->16  | 61.9                       |
|                                                    | Aztreonam                                           | 32                       | 128               | 0.06->128 | 9.5                        |
|                                                    | Piperacillin-tazobactam                             | 32                       | 64                | 4-128     | 42.9                       |
|                                                    | Doripenem                                           | 0.06                     | 0.25              | 0.03-1    | 100                        |
|                                                    | Imipenem                                            | 0.5                      | 1                 | 0.12-4    | 90.5                       |
|                                                    | Meropenem                                           | 0.03                     | 0.12              | 0.015-0.5 | 100                        |
|                                                    | Amikacin                                            | 2                        | >32               | 0.5->32   | 76.2                       |
|                                                    | Colistin (n=12) <sup>d</sup>                        | 0.5                      | 1                 | 0.25-2    | 100                        |
|                                                    | Tigecycline                                         | 0.25                     | 0.5               | 0.12-1    | 100                        |
|                                                    | Levofloxacin                                        | 0.5                      | >4                | 0.06->4   | 76.2                       |
|                                                    | Meropenem non-susceptible (1) <sup>f</sup>          | Ceftazidime-avibactam    | — <sup>b</sup>    | —         | 64                         |
| Ceftazidime                                        |                                                     | —                        | —                 | >128      | 0                          |
| Cefepime                                           |                                                     | —                        | —                 | 16        | 0                          |
| Aztreonam                                          |                                                     | —                        | —                 | 128       | 0                          |
| Piperacillin-tazobactam                            |                                                     | —                        | —                 | >128      | 0                          |
| Doripenem                                          |                                                     | —                        | —                 | >4        | 0                          |
| Imipenem                                           |                                                     | —                        | —                 | 4         | 0                          |
| Meropenem                                          |                                                     | —                        | —                 | 8         | 0                          |
| Amikacin                                           |                                                     | —                        | —                 | 8         | 100                        |
| Colistin (n=1) <sup>d</sup>                        |                                                     | —                        | —                 | 1         | 100                        |
| Tigecycline                                        |                                                     | —                        | —                 | 2         | 100                        |
| Levofloxacin                                       |                                                     | —                        | —                 | >4        | 0                          |
| Multidrug-resistant (2)                            |                                                     | Ceftazidime-avibactam    | — <sup>b</sup>    | —         | 0.12-64                    |
|                                                    | Ceftazidime                                         | —                        | —                 | 64->128   | 0                          |
|                                                    | Cefepime                                            | —                        | —                 | 16-16     | 0                          |
|                                                    | Aztreonam                                           | —                        | —                 | 32-128    | 0                          |
|                                                    | Piperacillin-tazobactam                             | —                        | —                 | 32->128   | 0                          |
|                                                    | Doripenem                                           | —                        | —                 | 0.06->4   | 50.0                       |
|                                                    | Imipenem                                            | —                        | —                 | 0.5-4     | 50.0                       |
|                                                    | Meropenem                                           | —                        | —                 | 0.03-8    | 50.0                       |
|                                                    | Amikacin                                            | —                        | —                 | 2-8       | 100                        |
|                                                    | Colistin (n=2) <sup>d</sup>                         | —                        | —                 | 0.5-1     | 100                        |
|                                                    | Tigecycline                                         | —                        | —                 | 0.25-2    | 100                        |
| Levofloxacin                                       | —                                                   | —                        | >4->4             | 0         |                            |
| Multidrug-resistant, MBL-negative (1)              | Ceftazidime-avibactam                               | 0.12                     | 0.12              | 0.12      | 100                        |
|                                                    | Ceftazidime                                         | 64                       | 64                | 64        | 0                          |
|                                                    | Cefepime                                            | 16                       | 16                | 16        | 0                          |
|                                                    | Aztreonam                                           | 32                       | 32                | 32        | 0                          |
|                                                    | Piperacillin-tazobactam                             | 32                       | 32                | 32        | 0                          |
|                                                    | Doripenem                                           | 0.06                     | 0.06              | 0.06      | 100                        |
|                                                    | Imipenem                                            | 0.5                      | 0.5               | 0.5       | 100                        |
|                                                    | Meropenem                                           | 0.03                     | 0.03              | 0.03      | 100                        |
|                                                    | Amikacin                                            | 2                        | 2                 | 2         | 100                        |
|                                                    | Colistin (n=1) <sup>d</sup>                         | 0.5                      | 0.5               | 0.5       | 100                        |
|                                                    | Tigecycline                                         | 0.25                     | 0.25              | 0.25      | 100                        |
|                                                    | Levofloxacin                                        | >4                       | >4                | >4        | 0                          |
|                                                    | Proteaceae <sup>g</sup><br>All (214) <sup>f,k</sup> | Ceftazidime-avibactam    | 0.03              | 0.12      | ≤0.015-2                   |
| Ceftazidime                                        |                                                     | 0.06                     | 0.5               | 0.03->128 | 97.2                       |

| Organism, phenotype (no. of isolates) <sup>a</sup> | Antimicrobial agent           | MIC (µg/ml) <sup>b</sup> |                   |            | % Susceptible <sup>c</sup> |
|----------------------------------------------------|-------------------------------|--------------------------|-------------------|------------|----------------------------|
|                                                    |                               | MIC <sub>50</sub>        | MIC <sub>90</sub> | Range      |                            |
|                                                    | Cefepime                      | ≤0.12                    | 0.25              | ≤0.12->16  | 96.7                       |
|                                                    | Aztreonam                     | ≤0.015                   | 0.12              | ≤0.015-128 | 98.6                       |
|                                                    | Piperacillin-tazobactam       | ≤0.25                    | 1                 | ≤0.25-32   | 99.1                       |
|                                                    | Doripenem                     | 0.25                     | 0.5               | 0.03-2     | 98.6                       |
|                                                    | Imipenem                      | 2                        | 4                 | 0.06-8     | 23.8                       |
|                                                    | Meropenem                     | 0.06                     | 0.25              | 0.03-1     | 100                        |
|                                                    | Amikacin                      | 4                        | 8                 | 0.5->32    | 98.6                       |
|                                                    | Colistin (n=125) <sup>d</sup> | >4                       | >4                | 2->4       | 0.8                        |
|                                                    | Tigecycline                   | 2                        | 4                 | 0.12-8     | 53.3                       |
|                                                    | Levofloxacin                  | 0.25                     | >4                | ≤0.03->4   | 80.8                       |
| Ceftazidime-non-susceptible (6) <sup>f</sup>       | Ceftazidime-avibactam         | — <sup>b</sup>           | —                 | 0.06-2     | 100                        |
|                                                    | Ceftazidime                   | —                        | —                 | 8->128     | 0                          |
|                                                    | Cefepime                      | —                        | —                 | ≤0.12->16  | 50.0                       |
|                                                    | Aztreonam                     | —                        | —                 | 0.25-128   | 50.0                       |
|                                                    | Piperacillin-tazobactam       | —                        | —                 | ≤0.25-32   | 83.3                       |
|                                                    | Doripenem                     | —                        | —                 | 0.12-1     | 100                        |
|                                                    | Imipenem                      | —                        | —                 | 0.5-4      | 16.7                       |
|                                                    | Meropenem                     | —                        | —                 | 0.06-0.25  | 100                        |
|                                                    | Amikacin                      | —                        | —                 | 2->32      | 50.0                       |
|                                                    | Colistin (n=3) <sup>d</sup>   | —                        | —                 | >4->4      | 0                          |
|                                                    | Tigecycline                   | —                        | —                 | 0.12-4     | 66.7                       |
|                                                    | Levofloxacin                  | —                        | —                 | 0.06->4    | 50.0                       |
| Multidrug-resistant (3) <sup>f</sup>               | Ceftazidime-avibactam         | — <sup>b</sup>           | —                 | 0.06-2     | 100                        |
|                                                    | Ceftazidime                   | —                        | —                 | 2->128     | 33.3                       |
|                                                    | Cefepime                      | —                        | —                 | 4->16      | 0                          |
|                                                    | Aztreonam                     | —                        | —                 | 4-128      | 33.3                       |
|                                                    | Piperacillin-tazobactam       | —                        | —                 | 2-32       | 66.7                       |
|                                                    | Doripenem                     | —                        | —                 | 0.25-1     | 100                        |
|                                                    | Imipenem                      | —                        | —                 | 2-4        | 0                          |
|                                                    | Meropenem                     | —                        | —                 | 0.12-0.25  | 100                        |
|                                                    | Amikacin                      | —                        | —                 | 8->32      | 33.3                       |
|                                                    | Colistin (n=2) <sup>d</sup>   | —                        | —                 | >4->4      | 0                          |
|                                                    | Tigecycline                   | —                        | —                 | 2-8        | 33.3                       |
|                                                    | Levofloxacin                  | —                        | —                 | 4->4       | 0                          |
| Other <i>Enterobacteriaceae</i> <sup>h</sup>       |                               |                          |                   |            |                            |
| All (62) <sup>f,i</sup>                            | Ceftazidime-avibactam         | 0.25                     | 0.5               | 0.06-1     | 100                        |
|                                                    | Ceftazidime                   | 0.25                     | 32                | 0.06->128  | 82.3                       |
|                                                    | Cefepime                      | ≤0.12                    | 16                | ≤0.12->16  | 82.3                       |
|                                                    | Aztreonam                     | 0.12                     | 64                | 0.03->128  | 82.3                       |
|                                                    | Piperacillin-tazobactam       | 2                        | 16                | 0.5->128   | 95.2                       |
|                                                    | Doripenem                     | 0.12                     | 0.25              | 0.06->4    | 96.8                       |
|                                                    | Imipenem                      | 0.5                      | 1                 | 0.12->8    | 91.9                       |
|                                                    | Meropenem                     | 0.06                     | 0.12              | 0.03->8    | 96.8                       |
|                                                    | Amikacin                      | 2                        | 16                | ≤0.25->32  | 90.3                       |
|                                                    | Colistin (n=43) <sup>d</sup>  | >4                       | >4                | 0.25->4    | 46.5                       |
|                                                    | Tigecycline                   | 1                        | 2                 | 0.12-4     | 98.4                       |
|                                                    | Levofloxacin                  | 0.25                     | >4                | ≤0.03->4   | 88.7                       |
| Ceftazidime-non-susceptible (11) <sup>f</sup>      | Ceftazidime-avibactam         | 0.5                      | 0.5               | 0.25-1     | 100                        |
|                                                    | Ceftazidime                   | 32                       | 64                | 8->128     | 0                          |
|                                                    | Cefepime                      | 16                       | >16               | 4->16      | 0                          |
|                                                    | Aztreonam                     | 64                       | >128              | 16->128    | 0                          |
|                                                    | Piperacillin-tazobactam       | 16                       | >128              | 2->128     | 81.8                       |
|                                                    | Doripenem                     | 0.06                     | >4                | 0.06->4    | 81.8                       |
|                                                    | Imipenem                      | 0.25                     | >8                | 0.12->8    | 81.8                       |
|                                                    | Meropenem                     | 0.06                     | >8                | 0.06->8    | 81.8                       |
|                                                    | Amikacin                      | 4                        | >32               | 2->32      | 72.7                       |
|                                                    | Colistin (n=10) <sup>d</sup>  | 1                        | >4                | 0.25->4    | 80.0                       |
|                                                    | Tigecycline                   | 0.5                      | 1                 | 0.25-2     | 100                        |
|                                                    | Levofloxacin                  | >4                       | >4                | 0.12->4    | 36.4                       |

| Organism, phenotype (no. of isolates) <sup>a</sup> | Antimicrobial agent           | MIC (µg/ml) <sup>b</sup> |                   |           | % Susceptible <sup>c</sup> |
|----------------------------------------------------|-------------------------------|--------------------------|-------------------|-----------|----------------------------|
|                                                    |                               | MIC <sub>50</sub>        | MIC <sub>90</sub> | Range     |                            |
| Meropenem-non-susceptible (2) <sup>f</sup>         | Ceftazidime-avibactam         | — <sup>b</sup>           | —                 | 0.5–1     | 100                        |
|                                                    | Ceftazidime                   | —                        | —                 | 64–>128   | 0                          |
|                                                    | Cefepime                      | —                        | —                 | >16–>16   | 0                          |
|                                                    | Aztreonam                     | —                        | —                 | >128–>128 | 0                          |
|                                                    | Piperacillin-tazobactam       | —                        | —                 | >128–>128 | 0                          |
|                                                    | Doripenem                     | —                        | —                 | >4–>4     | 0                          |
|                                                    | Imipenem                      | —                        | —                 | >8–>8     | 0                          |
|                                                    | Meropenem                     | —                        | —                 | >8–>8     | 0                          |
|                                                    | Amikacin                      | —                        | —                 | 32–>32    | 0                          |
|                                                    | Colistin (n=2) <sup>d</sup>   | —                        | —                 | 2–>4      | 50.0                       |
|                                                    | Tigecycline                   | —                        | —                 | 0.5–1     | 100                        |
| Levofloxacin                                       | —                             | —                        | 1–2               | 100       |                            |
| Multidrug-resistant (9) <sup>f</sup>               | Ceftazidime-avibactam         | — <sup>b</sup>           | —                 | 0.25–1    | 100                        |
|                                                    | Ceftazidime                   | —                        | —                 | 8–>128    | 0                          |
|                                                    | Cefepime                      | —                        | —                 | 4–>16     | 0                          |
|                                                    | Aztreonam                     | —                        | —                 | 16–>128   | 0                          |
|                                                    | Piperacillin-tazobactam       | —                        | —                 | 2–>128    | 77.8                       |
|                                                    | Doripenem                     | —                        | —                 | 0.06–>4   | 77.8                       |
|                                                    | Imipenem                      | —                        | —                 | 0.12–>8   | 77.8                       |
|                                                    | Meropenem                     | —                        | —                 | 0.06–>8   | 77.8                       |
|                                                    | Amikacin                      | —                        | —                 | 4–>32     | 66.7                       |
|                                                    | Colistin (n=9) <sup>d</sup>   | —                        | —                 | 0.5–>4    | 77.8                       |
|                                                    | Tigecycline                   | —                        | —                 | 0.25–1    | 100                        |
| Levofloxacin                                       | —                             | —                        | 0.12–>4           | 33.3      |                            |
| <i>Pseudomonas aeruginosa</i>                      |                               |                          |                   |           |                            |
| All (457)                                          | Ceftazidime-avibactam         | 2                        | 16                | 0.25–>128 | 88.2                       |
|                                                    | Ceftazidime                   | 4                        | >128              | 0.5–>128  | 75.1                       |
|                                                    | Cefepime                      | 4                        | >16               | 0.25–>16  | 79.7                       |
|                                                    | Aztreonam                     | 8                        | 64                | 1–>128    | 63.9                       |
|                                                    | Piperacillin-tazobactam       | 8                        | 128               | 0.5–>128  | 72.4                       |
|                                                    | Doripenem                     | 1                        | >4                | ≤0.015–>4 | 66.7                       |
|                                                    | Imipenem                      | 2                        | >8                | 0.12–>8   | 59.1                       |
|                                                    | Meropenem                     | 1                        | >8                | ≤0.06–>8  | 65.4                       |
|                                                    | Amikacin                      | 4                        | >32               | 0.5–>32   | 82.5                       |
|                                                    | Colistin (n=344) <sup>d</sup> | 2                        | 2                 | 0.5–8     | 93.6                       |
|                                                    | Levofloxacin                  | 1                        | >4                | ≤0.03–>4  | 69.2                       |
| All, MBL-negative (448)                            | Ceftazidime-avibactam         | 2                        | 16                | 0.25–>128 | 89.7                       |
|                                                    | Ceftazidime                   | 4                        | 128               | 0.5–>128  | 76.3                       |
|                                                    | Cefepime                      | 4                        | >16               | 0.25–>16  | 81.0                       |
|                                                    | Aztreonam                     | 8                        | 64                | 1–>128    | 64.1                       |
|                                                    | Piperacillin-tazobactam       | 8                        | 128               | 0.5–>128  | 73.0                       |
|                                                    | Doripenem                     | 1                        | >4                | ≤0.015–>4 | 68.1                       |
|                                                    | Imipenem                      | 2                        | >8                | 0.12–>8   | 60.3                       |
|                                                    | Meropenem                     | 1                        | >8                | ≤0.06–>8  | 66.7                       |
|                                                    | Amikacin                      | 4                        | >32               | 0.5–>32   | 83.0                       |
|                                                    | Colistin (n=337) <sup>d</sup> | 2                        | 2                 | 0.5–8     | 93.5                       |
|                                                    | Levofloxacin                  | 1                        | >4                | ≤0.03–>4  | 70.3                       |
| Ceftazidime-non-susceptible (114)                  | Ceftazidime-avibactam         | 8                        | >128              | 0.5–>128  | 52.6                       |
|                                                    | Ceftazidime                   | 128                      | >128              | 16–>128   | 0                          |
|                                                    | Cefepime                      | >16                      | >16               | 0.25–>16  | 20.2                       |
|                                                    | Aztreonam                     | 32                       | >128              | 4–>128    | 13.2                       |
|                                                    | Piperacillin-tazobactam       | 128                      | >128              | 4–>128    | 9.7                        |
|                                                    | Doripenem                     | >4                       | >4                | 0.12–>4   | 23.7                       |
|                                                    | Imipenem                      | >8                       | >8                | 1–>8      | 22.8                       |
|                                                    | Meropenem                     | >8                       | >8                | ≤0.06–>8  | 23.7                       |
|                                                    | Amikacin                      | 16                       | >32               | 0.5–>32   | 51.8                       |
|                                                    | Colistin (n=94) <sup>d</sup>  | 2                        | 2                 | 0.5–4     | 93.6                       |
|                                                    | Levofloxacin                  | >4                       | >4                | 0.25–>4   | 32.5                       |
| Ceftazidime-non-susceptible, MBL-negative (106)    | Ceftazidime-avibactam         | 8                        | 64                | 0.5–>128  | 56.6                       |

| Organism, phenotype (no. of isolates) <sup>a</sup> | Antimicrobial agent           | MIC (µg/ml) <sup>b</sup> |                   |          | % Susceptible <sup>c</sup> |
|----------------------------------------------------|-------------------------------|--------------------------|-------------------|----------|----------------------------|
|                                                    |                               | MIC <sub>50</sub>        | MIC <sub>90</sub> | Range    |                            |
|                                                    | Ceftazidime                   | 128                      | >128              | 16->128  | 0                          |
|                                                    | Cefepime                      | >16                      | >16               | 0.25->16 | 21.7                       |
|                                                    | Aztreonam                     | 32                       | >128              | 4->128   | 9.4                        |
|                                                    | Piperacillin-tazobactam       | 128                      | >128              | 8->128   | 6.6                        |
|                                                    | Doripenem                     | >4                       | >4                | 0.12->4  | 25.5                       |
|                                                    | Imipenem                      | >8                       | >8                | 1->8     | 24.5                       |
|                                                    | Meropenem                     | >8                       | >8                | ≤0.06->8 | 25.5                       |
|                                                    | Amikacin                      | 16                       | >32               | 0.5->32  | 51.9                       |
|                                                    | Colistin (n=88) <sup>d</sup>  | 2                        | 2                 | 0.5-4    | 93.2                       |
|                                                    | Levofloxacin                  | >4                       | >4                | 0.25->4  | 34.9                       |
| Meropenem non-susceptible (158)                    | Ceftazidime-avibactam         | 8                        | 64                | 0.5->128 | 67.7                       |
|                                                    | Ceftazidime                   | 16                       | >128              | 1->128   | 44.9                       |
|                                                    | Cefepime                      | 16                       | >16               | 0.25->16 | 49.4                       |
|                                                    | Aztreonam                     | 16                       | >128              | 1->128   | 31.7                       |
|                                                    | Piperacillin-tazobactam       | 64                       | >128              | 2->128   | 39.9                       |
|                                                    | Doripenem                     | >4                       | >4                | 1->4     | 6.3                        |
|                                                    | Imipenem                      | >8                       | >8                | 2->8     | 5.7                        |
|                                                    | Meropenem                     | >8                       | >8                | 4->8     | 0                          |
|                                                    | Amikacin                      | 8                        | >32               | 1->32    | 59.5                       |
|                                                    | Colistin (n=132) <sup>d</sup> | 2                        | 2                 | 0.5-4    | 93.2                       |
|                                                    | Levofloxacin                  | >4                       | >4                | 0.25->4  | 38.0                       |
| Meropenem non-susceptible, MBL-negative (149)      | Ceftazidime-avibactam         | 4                        | 64                | 0.5->128 | 71.1                       |
|                                                    | Ceftazidime                   | 16                       | >128              | 1->128   | 47.0                       |
|                                                    | Cefepime                      | 8                        | >16               | 0.25->16 | 51.7                       |
|                                                    | Aztreonam                     | 16                       | >128              | 1->128   | 30.2                       |
|                                                    | Piperacillin-tazobactam       | 64                       | >128              | 2->128   | 39.6                       |
|                                                    | Doripenem                     | >4                       | >4                | 1->4     | 6.7                        |
|                                                    | Imipenem                      | >8                       | >8                | 2->8     | 6.0                        |
|                                                    | Meropenem                     | >8                       | >8                | 4->8     | 0                          |
|                                                    | Amikacin                      | 8                        | >32               | 1->32    | 59.7                       |
|                                                    | Colistin (n=125) <sup>d</sup> | 2                        | 2                 | 0.5-4    | 92.8                       |
|                                                    | Levofloxacin                  | >4                       | >4                | 0.25->4  | 39.6                       |
| Colistin-resistant (1) <sup>f</sup>                | Ceftazidime-avibactam         | — <sup>b</sup>           | —                 | 2        | 100                        |
|                                                    | Ceftazidime                   | —                        | —                 | 2        | 100                        |
|                                                    | Cefepime                      | —                        | —                 | 2        | 100                        |
|                                                    | Aztreonam                     | —                        | —                 | 8        | 100                        |
|                                                    | Piperacillin-tazobactam       | —                        | —                 | 4        | 100                        |
|                                                    | Doripenem                     | —                        | —                 | 0.5      | 100                        |
|                                                    | Imipenem                      | —                        | —                 | 1        | 100                        |
|                                                    | Meropenem                     | —                        | —                 | 0.25     | 100                        |
|                                                    | Amikacin                      | —                        | —                 | 4        | 100                        |
|                                                    | Colistin (n=1) <sup>d</sup>   | —                        | —                 | 8        | 0                          |
|                                                    | Levofloxacin                  | —                        | —                 | 0.5      | 100                        |
| Multidrug-resistant (93)                           | Ceftazidime-avibactam         | 16                       | >128              | 1->128   | 45.2                       |
|                                                    | Ceftazidime                   | 128                      | >128              | 2->128   | 12.9                       |
|                                                    | Cefepime                      | >16                      | >16               | 0.25->16 | 16.1                       |
|                                                    | Aztreonam                     | 64                       | >128              | 4->128   | 12.9                       |
|                                                    | Piperacillin-tazobactam       | 128                      | >128              | 4->128   | 15.1                       |
|                                                    | Doripenem                     | >4                       | >4                | 0.12->4  | 6.5                        |
|                                                    | Imipenem                      | >8                       | >8                | 2->8     | 9.7                        |
|                                                    | Meropenem                     | >8                       | >8                | ≤0.06->8 | 6.5                        |
|                                                    | Amikacin                      | >32                      | >32               | 1->32    | 36.6                       |
|                                                    | Colistin (n=77) <sup>d</sup>  | 2                        | 2                 | 0.5-4    | 93.5                       |
|                                                    | Levofloxacin                  | >4                       | >4                | 0.5->4   | 14.0                       |
| Multidrug-resistant, MBL-negative (88)             | Ceftazidime-avibactam         | 16                       | 64                | 1->128   | 47.7                       |
|                                                    | Ceftazidime                   | 128                      | >128              | 2->128   | 13.6                       |
|                                                    | Cefepime                      | >16                      | >16               | 0.25->16 | 17.1                       |
|                                                    | Aztreonam                     | 64                       | >128              | 4->128   | 10.2                       |
|                                                    | Piperacillin-tazobactam       | 128                      | >128              | 4->128   | 13.6                       |



| Organism, phenotype (no. of isolates) <sup>a</sup> | Antimicrobial agent          | MIC (µg/ml) <sup>b</sup> |                   |          | % Susceptible <sup>c</sup> |
|----------------------------------------------------|------------------------------|--------------------------|-------------------|----------|----------------------------|
|                                                    |                              | MIC <sub>50</sub>        | MIC <sub>90</sub> | Range    |                            |
|                                                    | Doripenem                    | >4                       | >4                | 0.12->4  | 6.8                        |
|                                                    | Imipenem                     | >8                       | >8                | 2->8     | 10.2                       |
|                                                    | Meropenem                    | >8                       | >8                | ≤0.06->8 | 6.8                        |
|                                                    | Amikacin                     | >32                      | >32               | 1->32    | 37.5                       |
|                                                    | Colistin (n=74) <sup>d</sup> | 2                        | 2                 | 0.5-4    | 93.2                       |
|                                                    | Levofloxacin                 | >4                       | >4                | 0.5->4   | 14.8                       |

360 <sup>a</sup> MBL-negative, no gene encoding a metallo-β-lactamase was detected by polymerase chain reaction assay.

361 <sup>b</sup> —, MIC<sub>50</sub> and MIC<sub>90</sub> were not calculated for n <10 isolates.

362 <sup>c</sup> % Susceptibility was determined according to CLSI 2016 breakpoints with the exception of ceftazidime-avibactam  
363 and tigecycline where US FDA breakpoints were applied and colistin where EUCAST breakpoints were applied.

364 <sup>d</sup> Values are for colistin tested without 0.002% polysorbate-80; isolates collected in 2014-2015 only.

365 <sup>e</sup> Excluded isolates of Proteaceae and *Serratia* spp., which are intrinsically resistant to colistin.

366 <sup>f</sup> All isolates were MBL-negative.

367 <sup>g</sup> No meropenem non-susceptible isolates were collected.

368 <sup>h</sup> No colistin-resistant isolates were collected.

369 <sup>i</sup> *Enterobacter* spp. included *Enterobacter aerogenes* (n=64), *Enterobacter asburiae* (n=18), *Enterobacter cloacae*  
370 (n=141), and *Enterobacter kobei* (n=2).

371 <sup>j</sup> *Citrobacter* spp. included *Citrobacter braakii* (n=3), *Citrobacter freundii* (n=62), and *Citrobacter koseri* (n=19).

372 <sup>k</sup> Proteaceae included *Morganella morganii* (n=45), *Proteus mirabilis* (n=115), *Proteus penneri* (n=2), *Proteus*  
373 *vulgaris* (n=38), *Providencia rettgeri* (n=10), and *Providencia stuartii* (n=4).

374 <sup>l</sup> Other *Enterobacteriaceae* included *Pantoea agglomerans* (n=1), *Pluralibacter gergoviae* (n=2), *Raoultella*  
375 *ornithinolytica* (n=20), *Raoultella planticola* (n=1), *Serratia marcescens* (n=37), and *Serratia ureilytica* (n=1).

376 **Table S6B.** Mexico - *In vitro* activities of ceftazidime-avibactam and comparator antimicrobial  
 377 agents tested against 855 isolates of  $\beta$ -lactamase-positive *Enterobacteriaceae* (n=674) and *P.*  
 378 *aeruginosa* (n=181) collected as part of the INFORM global surveillance program in 2012–2015.  
 379

| Organism/Genotype (no. of isolates) <sup>a</sup> | Antimicrobial agent                             | MIC ( $\mu$ g/ml) <sup>b</sup> |                   |                  | % Susceptible <sup>c</sup> |
|--------------------------------------------------|-------------------------------------------------|--------------------------------|-------------------|------------------|----------------------------|
|                                                  |                                                 | MIC <sub>50</sub>              | MIC <sub>90</sub> | Range            |                            |
| <i>Enterobacteriaceae</i> (674)                  |                                                 |                                |                   |                  |                            |
| OSBL-positive (7)                                | Ceftazidime-avibactam                           | — <sup>b</sup>                 | —                 | 0.06–0.5         | 100                        |
|                                                  | Ceftazidime                                     | —                              | —                 | 0.06–>128        | 42.9                       |
|                                                  | Cefepime                                        | —                              | —                 | $\leq$ 0.12–>16  | 57.1                       |
|                                                  | Aztreonam                                       | —                              | —                 | $\leq$ 0.015–128 | 42.9                       |
|                                                  | Piperacillin-tazobactam                         | —                              | —                 | $\leq$ 0.25–>128 | 57.1                       |
|                                                  | Doripenem                                       | —                              | —                 | 0.03–0.5         | 100                        |
|                                                  | Imipenem                                        | —                              | —                 | 0.12–8           | 71.4                       |
|                                                  | Meropenem                                       | —                              | —                 | 0.03–0.12        | 100                        |
|                                                  | Amikacin                                        | —                              | —                 | 1–>32            | 71.4                       |
|                                                  | Colistin (n=4) <sup>d</sup>                     | —                              | —                 | 1–>4             | 75.0                       |
|                                                  | Tigecycline                                     | —                              | —                 | 0.25–2           | 100                        |
|                                                  | Levofloxacin                                    | —                              | —                 | $\leq$ 0.03–>4   | 57.1                       |
|                                                  | ESBL-positive (591) <sup>e</sup>                |                                |                   |                  |                            |
| ESBL-positive (591) <sup>e</sup>                 | Ceftazidime-avibactam                           | 0.25                           | 0.5               | $\leq$ 0.015–4   | 100                        |
|                                                  | Ceftazidime                                     | 32                             | 128               | 0.5–>128         | 4.4                        |
|                                                  | Cefepime                                        | >16                            | >16               | 0.5–>16          | 2.7                        |
|                                                  | Aztreonam                                       | 64                             | 128               | 2–>128           | 2.7                        |
|                                                  | Piperacillin-tazobactam                         | 16                             | 64                | 0.5–>128         | 72.8                       |
|                                                  | Doripenem                                       | 0.06                           | 0.12              | 0.015–4          | 99.5                       |
|                                                  | Imipenem                                        | 0.25                           | 0.5               | 0.06–8           | 99.7                       |
|                                                  | Meropenem                                       | 0.03                           | 0.06              | 0.015–8          | 99.3                       |
|                                                  | Amikacin                                        | 4                              | 16                | 0.5–>32          | 94.2                       |
|                                                  | Colistin (n=376) <sup>d</sup>                   | 0.5                            | 1                 | $\leq$ 0.12–>4   | 99.2                       |
|                                                  | Tigecycline                                     | 0.5                            | 2                 | 0.06–8           | 96.8                       |
|                                                  | Levofloxacin                                    | >4                             | >4                | $\leq$ 0.03–>4   | 27.7                       |
|                                                  | AmpC-positive (39) <sup>f</sup>                 |                                |                   |                  |                            |
| AmpC-positive (39) <sup>f</sup>                  | Ceftazidime-avibactam                           | 0.25                           | 1                 | 0.03–4           | 100                        |
|                                                  | Ceftazidime                                     | 16                             | >128              | 0.03–>128        | 38.5                       |
|                                                  | Cefepime                                        | $\leq$ 0.12                    | 4                 | $\leq$ 0.12–>16  | 79.5                       |
|                                                  | Aztreonam                                       | 8                              | 64                | $\leq$ 0.015–128 | 48.7                       |
|                                                  | Piperacillin-tazobactam                         | 8                              | >128              | 0.5–>128         | 69.2                       |
|                                                  | Doripenem                                       | 0.06                           | 0.5               | 0.03–4           | 94.9                       |
|                                                  | Imipenem                                        | 1                              | 8                 | 0.12–>8          | 53.8                       |
|                                                  | Meropenem                                       | 0.06                           | 0.25              | 0.015–8          | 94.9                       |
|                                                  | Amikacin                                        | 2                              | 8                 | $\leq$ 0.25–>32  | 94.9                       |
|                                                  | Colistin (n=18) <sup>d</sup>                    | 1                              | >4                | 0.25–>4          | 88.9                       |
|                                                  | Tigecycline                                     | 0.5                            | 2                 | 0.12–4           | 97.4                       |
|                                                  | Levofloxacin                                    | 0.12                           | >4                | $\leq$ 0.03–>4   | 76.9                       |
|                                                  | ESBL-positive + AmpC-positive (22) <sup>g</sup> |                                |                   |                  |                            |
| ESBL-positive + AmpC-positive (22) <sup>g</sup>  | Ceftazidime-avibactam                           | 0.5                            | 2                 | 0.03–2           | 100                        |
|                                                  | Ceftazidime                                     | 64                             | >128              | 0.12–>128        | 4.5                        |
|                                                  | Cefepime                                        | >16                            | >16               | $\leq$ 0.12–>16  | 18.2                       |
|                                                  | Aztreonam                                       | 128                            | >128              | 0.25–>128        | 9.1                        |
|                                                  | Piperacillin-tazobactam                         | 32                             | >128              | 2–>128           | 40.9                       |
|                                                  | Doripenem                                       | 0.06                           | 4                 | 0.03–>4          | 81.8                       |
|                                                  | Imipenem                                        | 0.25                           | 4                 | 0.12–>8          | 77.3                       |
|                                                  | Meropenem                                       | 0.06                           | 4                 | 0.03–>8          | 81.8                       |
|                                                  | Amikacin                                        | 4                              | 32                | 0.5–>32          | 72.7                       |
|                                                  | Colistin (n=15) <sup>d</sup>                    | 0.5                            | 4                 | 0.25–>4          | 86.7                       |
|                                                  | Tigecycline                                     | 0.5                            | 4                 | 0.25–4           | 86.4                       |
|                                                  | Levofloxacin                                    | >4                             | >4                | 0.12–>4          | 18.2                       |
|                                                  | KPC-positive (2) <sup>h</sup>                   |                                |                   |                  |                            |
| KPC-positive (2) <sup>h</sup>                    | Ceftazidime-avibactam                           | — <sup>b</sup>                 | —                 | 1–8              | 100                        |
|                                                  | Ceftazidime                                     | —                              | —                 | >128–>128        | 0                          |
|                                                  | Cefepime                                        | —                              | —                 | >16–>16          | 0                          |

| Organism/Genotype (no. of isolates) <sup>a</sup>                | Antimicrobial agent          | MIC ( $\mu\text{g/ml}$ ) <sup>b</sup> |                   |           | % Susceptible <sup>c</sup> |
|-----------------------------------------------------------------|------------------------------|---------------------------------------|-------------------|-----------|----------------------------|
|                                                                 |                              | MIC <sub>50</sub>                     | MIC <sub>90</sub> | Range     |                            |
|                                                                 | Aztreonam                    | —                                     | —                 | >128->128 | 0                          |
|                                                                 | Piperacillin-tazobactam      | —                                     | —                 | >128->128 | 0                          |
|                                                                 | Doripenem                    | —                                     | —                 | >4->4     | 0                          |
|                                                                 | Imipenem                     | —                                     | —                 | >8->8     | 0                          |
|                                                                 | Meropenem                    | —                                     | —                 | >8-8      | 0                          |
|                                                                 | Amikacin                     | —                                     | —                 | 8->32     | 50.0                       |
|                                                                 | Colistin (n=2) <sup>d</sup>  | —                                     | —                 | 1-2       | 100                        |
|                                                                 | Tigecycline                  | —                                     | —                 | 0.25-0.5  | 100                        |
|                                                                 | Levofloxacin                 | —                                     | —                 | 2->4      | 50.0                       |
| <hr/>                                                           |                              |                                       |                   |           |                            |
| OXA-48-like-positive (2) <sup>i</sup>                           | Ceftazidime-avibactam        | — <sup>b</sup>                        | —                 | 0.06-0.06 | 100                        |
|                                                                 | Ceftazidime                  | —                                     | —                 | 16-32     | 0                          |
|                                                                 | Cefepime                     | —                                     | —                 | >16->16   | 0                          |
|                                                                 | Aztreonam                    | —                                     | —                 | 16-64     | 0                          |
|                                                                 | Piperacillin-tazobactam      | —                                     | —                 | 4->128    | 50.0                       |
|                                                                 | Doripenem                    | —                                     | —                 | 0.03-0.25 | 100                        |
|                                                                 | Imipenem                     | —                                     | —                 | 0.12-2    | 50.0                       |
|                                                                 | Meropenem                    | —                                     | —                 | 0.015-0.5 | 100                        |
|                                                                 | Amikacin                     | —                                     | —                 | 2-8       | 100                        |
|                                                                 | Colistin (n=1) <sup>d</sup>  | —                                     | —                 | 0.5       | 100                        |
|                                                                 | Tigecycline                  | —                                     | —                 | 0.25-0.25 | 100                        |
|                                                                 | Levofloxacin                 | —                                     | —                 | 1->4      | 50.0                       |
| <hr/>                                                           |                              |                                       |                   |           |                            |
| MBL-positive (11) <sup>j</sup>                                  | Ceftazidime-avibactam        | 32                                    | 128               | 0.12->128 | 9.1                        |
|                                                                 | Ceftazidime                  | 128                                   | >128              | 0.25->128 | 9.1                        |
|                                                                 | Cefepime                     | >16                                   | >16               | 1->16     | 9.1                        |
|                                                                 | Aztreonam                    | 0.25                                  | 128               | 0.03->128 | 63.6                       |
|                                                                 | Piperacillin-tazobactam      | >128                                  | >128              | 1->128    | 9.1                        |
|                                                                 | Doripenem                    | >4                                    | >4                | 2->4      | 0                          |
|                                                                 | Imipenem                     | 4                                     | >8                | 4->8      | 0                          |
|                                                                 | Meropenem                    | 4                                     | >8                | 1->8      | 9.1                        |
|                                                                 | Amikacin                     | 32                                    | >32               | 8->32     | 45.5                       |
|                                                                 | Colistin (n=10) <sup>d</sup> | 1                                     | >4                | 0.5->4    | 60.0                       |
|                                                                 | Tigecycline                  | 0.5                                   | 2                 | 0.5-4     | 90.9                       |
|                                                                 | Levofloxacin                 | 1                                     | >4                | 0.25->4   | 54.5                       |
| <hr/>                                                           |                              |                                       |                   |           |                            |
| <i>P. aeruginosa</i> (181)<br>ESBL-positive (10) <sup>k,l</sup> | Ceftazidime-avibactam        | 16                                    | 64                | 4-64      | 30.0                       |
|                                                                 | Ceftazidime                  | >128                                  | >128              | 128->128  | 0                          |
|                                                                 | Cefepime                     | >16                                   | >16               | 0.25->16  | 10.0                       |
|                                                                 | Aztreonam                    | 32                                    | >128              | 8->128    | 10.0                       |
|                                                                 | Piperacillin-tazobactam      | 128                                   | >128              | 64->128   | 0                          |
|                                                                 | Doripenem                    | >4                                    | >4                | >4->4     | 0                          |
|                                                                 | Imipenem                     | >8                                    | >8                | >8->8     | 0                          |
|                                                                 | Meropenem                    | >8                                    | >8                | >8->8     | 0                          |
|                                                                 | Amikacin                     | >32                                   | >32               | 8->32     | 20.0                       |
|                                                                 | Colistin (n=6) <sup>d</sup>  | — <sup>b</sup>                        | —                 | 0.5-2     | 100                        |
|                                                                 | Levofloxacin                 | >4                                    | >4                | 1->4      | 10.0                       |
| <hr/>                                                           |                              |                                       |                   |           |                            |
| GES carbapenemase-positive (33) <sup>k,m</sup>                  | Ceftazidime-avibactam        | 32                                    | 128               | 2->128    | 27.3                       |
|                                                                 | Ceftazidime                  | >128                                  | >128              | 32->128   | 0                          |
|                                                                 | Cefepime                     | >16                                   | >16               | 16->16    | 0                          |
|                                                                 | Aztreonam                    | 128                                   | >128              | 8->128    | 9.1                        |
|                                                                 | Piperacillin-tazobactam      | >128                                  | >128              | 64->128   | 0                          |
|                                                                 | Doripenem                    | >4                                    | >4                | >4->4     | 0                          |
|                                                                 | Imipenem                     | >8                                    | >8                | 2->8      | 15.2                       |
|                                                                 | Meropenem                    | >8                                    | >8                | 8->8      | 0                          |
|                                                                 | Amikacin                     | >32                                   | >32               | 8->32     | 15.2                       |
|                                                                 | Colistin (n=27) <sup>d</sup> | 2                                     | 2                 | 1-4       | 92.6                       |
|                                                                 | Levofloxacin                 | >4                                    | >4                | >4->4     | 0                          |
| <hr/>                                                           |                              |                                       |                   |           |                            |
| GES, spectrum undefined-positive (1) <sup>k,n</sup>             | Ceftazidime-avibactam        | — <sup>b</sup>                        | —                 | >128      | 0                          |

| Organism/Genotype (no. of isolates) <sup>a</sup>           | Antimicrobial agent           | MIC ( $\mu\text{g/ml}$ ) <sup>b</sup> |                   |          | % Susceptible <sup>c</sup> |
|------------------------------------------------------------|-------------------------------|---------------------------------------|-------------------|----------|----------------------------|
|                                                            |                               | MIC <sub>50</sub>                     | MIC <sub>90</sub> | Range    |                            |
|                                                            | Ceftazidime                   | —                                     | —                 | >128     | 0                          |
|                                                            | Cefepime                      | —                                     | —                 | >16      | 0                          |
|                                                            | Aztreonam                     | —                                     | —                 | >128     | 0                          |
|                                                            | Piperacillin-tazobactam       | —                                     | —                 | >128     | 0                          |
|                                                            | Doripenem                     | —                                     | —                 | >4       | 0                          |
|                                                            | Imipenem                      | —                                     | —                 | >8       | 0                          |
|                                                            | Meropenem                     | —                                     | —                 | >8       | 0                          |
|                                                            | Amikacin                      | —                                     | —                 | >32      | 0                          |
|                                                            | Colistin (n=1) <sup>d</sup>   | —                                     | —                 | 1        | 100                        |
|                                                            | Levofloxacin                  | —                                     | —                 | >4       | 0                          |
| <hr/>                                                      |                               |                                       |                   |          |                            |
| MBL-positive (9) <sup>k,o</sup>                            | Ceftazidime-avibactam         | — <sup>b</sup>                        | —                 | 2->128   | 11.1                       |
|                                                            | Ceftazidime                   | —                                     | —                 | 8->128   | 11.1                       |
|                                                            | Cefepime                      | —                                     | —                 | 4->16    | 11.1                       |
|                                                            | Aztreonam                     | —                                     | —                 | 4-128    | 55.6                       |
|                                                            | Piperacillin-tazobactam       | —                                     | —                 | 4->128   | 44.4                       |
|                                                            | Doripenem                     | —                                     | —                 | >4->4    | 0                          |
|                                                            | Imipenem                      | —                                     | —                 | 8->8     | 0                          |
|                                                            | Meropenem                     | —                                     | —                 | 4->8     | 0                          |
|                                                            | Amikacin                      | —                                     | —                 | 2->32    | 55.6                       |
|                                                            | Colistin (n=7) <sup>d</sup>   | —                                     | —                 | 0.5-2    | 100                        |
|                                                            | Levofloxacin                  | —                                     | —                 | 1->4     | 11.1                       |
| <hr/>                                                      |                               |                                       |                   |          |                            |
| No acquired $\beta$ -lactamase detected (124) <sup>k</sup> | Ceftazidime-avibactam         | 2                                     | 8                 | 0.5->128 | 90.6                       |
|                                                            | Ceftazidime                   | 4                                     | 64                | 1->128   | 68.8                       |
|                                                            | Cefepime                      | 8                                     | >16               | 0.5->16  | 76.6                       |
|                                                            | Aztreonam                     | 16                                    | 64                | 1->128   | 45.3                       |
|                                                            | Piperacillin-tazobactam       | 16                                    | >128              | 1->128   | 60.9                       |
|                                                            | Doripenem                     | 4                                     | >4                | 0.25->4  | 23.4                       |
|                                                            | Imipenem                      | >8                                    | >8                | 1->8     | 3.9                        |
|                                                            | Meropenem                     | 8                                     | >8                | 0.25->8  | 18.0                       |
|                                                            | Amikacin                      | 4                                     | >32               | 1->32    | 80.5                       |
|                                                            | Colistin (n=100) <sup>d</sup> | 2                                     | 2                 | 0.5-4    | 92.0                       |
|                                                            | Levofloxacin                  | 2                                     | >4                | 0.25->4  | 58.6                       |

380 <sup>a</sup> OSBL, original-spectrum  $\beta$ -lactamase (e.g. TEM-1, SHV-1, SHV-11); ESBL, extended-spectrum  $\beta$ -lactamase;  
381 MBL, metallo- $\beta$ -lactamase.

382 <sup>b</sup> —, MIC<sub>50</sub> and MIC<sub>90</sub> were not calculated for n <10 isolates.

383 <sup>c</sup> % Susceptibility was determined according to CLSI 2016 breakpoints with the exception of ceftazidime-avibactam  
384 and tigecycline where US FDA breakpoints were applied and colistin where EUCAST breakpoints were applied.

385 <sup>d</sup> Values are for colistin tested without 0.002% polysorbate-80; isolates collected in 2014-2015 only.

386 <sup>e</sup> Included isolates carrying CTX-M-3; CTX-M-14; CTX-M-15; CTX-M-27; CTX-M-55; CTX-M-79; CTX-M-15  
387 and CTX-M-55; CTX-M-55 and CTX-M-79; CTX-M-15 and SHV-2;  
388 CTX-M-15 and SHV-2A; CTX-M-15 and SHV-5; CTX-M-15 and SHV-12; CTX-M-15 and SHV-108; CTX-M-15  
389 and PER-1; SHV-2; SHV-2A; SHV-5; SHV-12; TEM-4; TEM-52; with or without a SHV-OSBL and/or TEM-  
390 OSBL.

391 <sup>f</sup> Included isolates carrying CMY-2 or the chromosomal AmpCs common to *Citrobacter* spp., *Enterobacter* spp., *M.*  
392 *morganii*, and *Serratia* spp. with or without a TEM-OSBL.

393 <sup>g</sup> Included isolates co-carrying CMY-2 and CTX-M-1, CTX-M-2, CTX-M-14, CTX-M-15, CTX-M-27, CTX-M-55,  
394 SHV-5, or SHV-12; CTX-M-15 and CMY-type; and the chromosomal AmpCs common to *Enterobacter* spp. and

395 *Serratia* spp. with CTX-M-15, SHV-5, or CTX-M-15 and SHV-12; with or without a SHV-OSBL and/or a TEM-  
396 OSBL.  
397 <sup>h</sup> Isolates carrying KPC-3 or KPC-3 and SHV-5, with or without a SHV-OSBL and/or TEM-OSBL.  
398 <sup>i</sup> Isolates carrying OXA-163 and CTX-M-15, or OXA-232 and CTX-M-15 and a TEM-OSBL.  
399 <sup>j</sup> Included isolates carrying VIM-23 and the chromosomal AmpCs common to *Citrobacter* spp. and *Enterobacter*  
400 spp., VIM-23 and CTX-M-15; NDM-1; NDM-1 and CTX-M-15; with or without a SHV-OSBL and/or TEM-OSBL.  
401 <sup>k</sup> Assumed to carry the chromosomal AmpC common to *P. aeruginosa*.  
402 <sup>l</sup> Included isolates carrying GES-1; GES-19; or GES-1 and a GES-type  $\beta$ -lactamase.  
403 <sup>m</sup> Included isolates carrying GES-5; GES-20; GES-5 and GES-1; or GES-20 and GES-19.  
404 <sup>n</sup> Spectrum undefined, GES  $\beta$ -lactamase with undefined (ESBL or carbapenemase) activity; isolate carrying GES-26.  
405 <sup>o</sup> Included isolates carrying IMP-1; IMP-15; IMP-18; or VIM-2.

406 **Table S7A.** Venezuela - *In vitro* activities of ceftazidime-avibactam and comparator  
 407 antimicrobial agents tested against 1,498 isolates of *Enterobacteriaceae* and *P. aeruginosa*  
 408 collected as part of the INFORM global surveillance program in 2012-2015.  
 409

| Organism, phenotype (no. of isolates) <sup>a</sup> | Antimicrobial agent                             | MIC (µg/ml) <sup>b</sup> |                   |             | % Susceptible <sup>c</sup> |      |
|----------------------------------------------------|-------------------------------------------------|--------------------------|-------------------|-------------|----------------------------|------|
|                                                    |                                                 | MIC <sub>50</sub>        | MIC <sub>90</sub> | Range       |                            |      |
| <i>Enterobacteriaceae</i>                          |                                                 |                          |                   |             |                            |      |
| All (1,201)                                        | Ceftazidime-avibactam                           | 0.12                     | 0.25              | ≤0.015->128 | 99.8                       |      |
|                                                    | Ceftazidime                                     | 0.25                     | 64                | ≤0.015->128 | 76.4                       |      |
|                                                    | Cefepime                                        | ≤0.12                    | >16               | ≤0.12->16   | 77.9                       |      |
|                                                    | Aztreonam                                       | 0.12                     | 64                | ≤0.015->128 | 75.1                       |      |
|                                                    | Piperacillin-tazobactam                         | 4                        | 64                | ≤0.25->128  | 86.3                       |      |
|                                                    | Doripenem                                       | 0.06                     | 0.25              | ≤0.008->4   | 98.1                       |      |
|                                                    | Imipenem                                        | 0.25                     | 2                 | ≤0.03->8    | 85.2                       |      |
|                                                    | Meropenem                                       | 0.03                     | 0.12              | ≤0.004->8   | 98.3                       |      |
|                                                    | Amikacin                                        | 2                        | 8                 | ≤0.25->32   | 94.8                       |      |
|                                                    | Colistin (n=700) <sup>d</sup>                   | 0.5                      | >4                | ≤0.12->4    | 83.0                       |      |
|                                                    | Tigecycline                                     | 0.5                      | 2                 | ≤0.015->8   | 94.3                       |      |
|                                                    | Levofloxacin                                    | 0.12                     | >4                | ≤0.03->4    | 68.5                       |      |
|                                                    | All, MBL-negative (1,199)                       | Ceftazidime-avibactam    | 0.12              | 0.25        | ≤0.015-8                   | 100  |
|                                                    |                                                 | Ceftazidime              | 0.25              | 64          | ≤0.015->128                | 76.6 |
| Cefepime                                           |                                                 | ≤0.12                    | >16               | ≤0.12->16   | 78.0                       |      |
| Aztreonam                                          |                                                 | 0.12                     | 64                | ≤0.015->128 | 75.2                       |      |
| Piperacillin-tazobactam                            |                                                 | 4                        | 64                | ≤0.25->128  | 86.4                       |      |
| Doripenem                                          |                                                 | 0.06                     | 0.25              | ≤0.008->4   | 98.3                       |      |
| Imipenem                                           |                                                 | 0.25                     | 2                 | ≤0.03->8    | 85.3                       |      |
| Meropenem                                          |                                                 | 0.03                     | 0.12              | ≤0.004->8   | 98.4                       |      |
| Amikacin                                           |                                                 | 2                        | 8                 | ≤0.25->32   | 94.8                       |      |
| Colistin (n=698) <sup>d</sup>                      |                                                 | 0.5                      | >4                | ≤0.12->4    | 83.0                       |      |
| Tigecycline                                        |                                                 | 0.5                      | 2                 | ≤0.015->8   | 94.3                       |      |
| Levofloxacin                                       |                                                 | 0.12                     | >4                | ≤0.03->4    | 68.6                       |      |
| Ceftazidime non-susceptible (283)                  |                                                 | Ceftazidime-avibactam    | 0.25              | 1           | ≤0.015->128                | 99.3 |
|                                                    |                                                 | Ceftazidime              | 64                | 128         | 8->128                     | 0    |
|                                                    | Cefepime                                        | >16                      | >16               | ≤0.12->16   | 20.9                       |      |
|                                                    | Aztreonam                                       | 64                       | >128              | 0.12->128   | 5.3                        |      |
|                                                    | Piperacillin-tazobactam                         | 16                       | >128              | ≤0.25->128  | 58.7                       |      |
|                                                    | Doripenem                                       | 0.06                     | 0.25              | 0.015->4    | 92.9                       |      |
|                                                    | Imipenem                                        | 0.25                     | 2                 | 0.06->8     | 88.0                       |      |
|                                                    | Meropenem                                       | 0.06                     | 0.12              | 0.015->8    | 93.3                       |      |
|                                                    | Amikacin                                        | 8                        | >32               | ≤0.25->32   | 80.6                       |      |
|                                                    | Colistin (n=168) <sup>d</sup>                   | 0.5                      | 1                 | ≤0.12->4    | 92.9                       |      |
|                                                    | Tigecycline                                     | 0.5                      | 1                 | 0.06->8     | 95.8                       |      |
|                                                    | Levofloxacin                                    | >4                       | >4                | ≤0.03->4    | 31.1                       |      |
|                                                    | Ceftazidime non-susceptible, MBL-negative (281) | Ceftazidime-avibactam    | 0.25              | 0.5         | ≤0.015-8                   | 100  |
|                                                    |                                                 | Ceftazidime              | 64                | 128         | 8->128                     | 0    |
| Cefepime                                           |                                                 | >16                      | >16               | ≤0.12->16   | 21.0                       |      |
| Aztreonam                                          |                                                 | 64                       | >128              | 0.12->128   | 5.3                        |      |
| Piperacillin-tazobactam                            |                                                 | 16                       | >128              | ≤0.25->128  | 59.1                       |      |
| Doripenem                                          |                                                 | 0.06                     | 0.25              | 0.015->4    | 93.6                       |      |
| Imipenem                                           |                                                 | 0.25                     | 2                 | 0.06->8     | 88.6                       |      |
| Meropenem                                          |                                                 | 0.06                     | 0.12              | 0.015->8    | 94.0                       |      |
| Amikacin                                           |                                                 | 8                        | >32               | ≤0.25->32   | 80.4                       |      |
| Colistin (n=166) <sup>d</sup>                      |                                                 | 0.5                      | 1                 | ≤0.12->4    | 92.8                       |      |
| Tigecycline                                        |                                                 | 0.5                      | 1                 | 0.06->8     | 95.7                       |      |
| Levofloxacin                                       |                                                 | >4                       | >4                | ≤0.03->4    | 31.0                       |      |
| Meropenem non-susceptible (21)                     |                                                 | Ceftazidime-avibactam    | 0.5               | 2           | 0.03->128                  | 90.5 |
|                                                    |                                                 | Ceftazidime              | 64                | >128        | 2->128                     | 9.5  |
|                                                    | Cefepime                                        | >16                      | >16               | 2->16       | 4.8                        |      |

| Organism, phenotype (no. of isolates) <sup>a</sup> | Antimicrobial agent                          | MIC (µg/ml) <sup>b</sup> |                   |             | % Susceptible <sup>c</sup> |
|----------------------------------------------------|----------------------------------------------|--------------------------|-------------------|-------------|----------------------------|
|                                                    |                                              | MIC <sub>50</sub>        | MIC <sub>90</sub> | Range       |                            |
|                                                    | Aztreonam                                    | >128                     | >128              | 4->128      | 4.8                        |
|                                                    | Piperacillin-tazobactam                      | >128                     | >128              | 4->128      | 9.5                        |
|                                                    | Doripenem                                    | >4                       | >4                | 2->4        | 0                          |
|                                                    | Imipenem                                     | 8                        | >8                | 1->8        | 4.8                        |
|                                                    | Meropenem                                    | >8                       | >8                | 2->8        | 0                          |
|                                                    | Amikacin                                     | 4                        | >32               | 0.5->32     | 61.9                       |
|                                                    | Colistin (n=15) <sup>d</sup>                 | 0.5                      | 2                 | 0.25->4     | 93.3                       |
|                                                    | Tigecycline                                  | 0.5                      | 2                 | 0.5-2       | 100                        |
|                                                    | Levofloxacin                                 | >4                       | >4                | 0.06->4     | 33.3                       |
|                                                    | Meropenem non-susceptible, MBL-negative (19) | Ceftazidime-avibactam    | 0.5               | 2           | 0.03-2                     |
| Ceftazidime                                        |                                              | 32                       | >128              | 2->128      | 10.5                       |
| Cefepime                                           |                                              | >16                      | >16               | 2->16       | 5.3                        |
| Aztreonam                                          |                                              | >128                     | >128              | 4->128      | 5.3                        |
| Piperacillin-tazobactam                            |                                              | >128                     | >128              | 4->128      | 10.5                       |
| Doripenem                                          |                                              | 4                        | >4                | 2->4        | 0                          |
| Imipenem                                           |                                              | 8                        | >8                | 1->8        | 5.3                        |
| Meropenem                                          |                                              | >8                       | >8                | 2->8        | 0                          |
| Amikacin                                           |                                              | 8                        | >32               | 0.5->32     | 57.9                       |
| Colistin (n=13) <sup>d</sup>                       |                                              | 0.5                      | 2                 | 0.25->4     | 92.3                       |
| Tigecycline                                        |                                              | 0.5                      | 2                 | 0.5-2       | 100                        |
| Levofloxacin                                       |                                              | >4                       | >4                | 0.06->4     | 31.6                       |
| Colistin-resistant (13) <sup>e,f</sup>             |                                              | Ceftazidime-avibactam    | 0.12              | 0.5         | 0.06-0.5                   |
|                                                    | Ceftazidime                                  | 0.5                      | 8                 | 0.25-8      | 84.6                       |
|                                                    | Cefepime                                     | ≤0.12                    | 8                 | ≤0.12->16   | 84.6                       |
|                                                    | Aztreonam                                    | 0.12                     | 16                | 0.06-64     | 84.6                       |
|                                                    | Piperacillin-tazobactam                      | 4                        | 16                | 2-16        | 100                        |
|                                                    | Doripenem                                    | 0.06                     | 0.12              | 0.03-0.25   | 100                        |
|                                                    | Imipenem                                     | 1                        | 1                 | 0.12-2      | 92.3                       |
|                                                    | Meropenem                                    | 0.06                     | 0.06              | 0.03-0.12   | 100                        |
|                                                    | Amikacin                                     | 2                        | 4                 | 0.5-4       | 100                        |
|                                                    | Colistin (n=13) <sup>d</sup>                 | >4                       | >4                | 4->4        | 0                          |
|                                                    | Tigecycline                                  | 0.5                      | 1                 | 0.25-2      | 100                        |
|                                                    | Levofloxacin                                 | 0.12                     | >4                | ≤0.03->4    | 76.9                       |
|                                                    | Multidrug-resistant (196)                    | Ceftazidime-avibactam    | 0.25              | 1           | ≤0.015->128                |
| Ceftazidime                                        |                                              | 64                       | >128              | 0.12->128   | 8.7                        |
| Cefepime                                           |                                              | >16                      | >16               | 0.5->16     | 3.1                        |
| Aztreonam                                          |                                              | 64                       | >128              | ≤0.015->128 | 3.6                        |
| Piperacillin-tazobactam                            |                                              | 16                       | >128              | ≤0.25->128  | 51.5                       |
| Doripenem                                          |                                              | 0.06                     | 2                 | 0.015->4    | 88.8                       |
| Imipenem                                           |                                              | 0.25                     | 4                 | 0.12->8     | 82.7                       |
| Meropenem                                          |                                              | 0.06                     | 2                 | 0.015->8    | 89.3                       |
| Amikacin                                           |                                              | 8                        | >32               | ≤0.25->32   | 77.6                       |
| Colistin (n=118) <sup>d</sup>                      |                                              | 0.5                      | >4                | ≤0.12->4    | 88.1                       |
| Tigecycline                                        |                                              | 0.5                      | 2                 | 0.06->8     | 94.4                       |
| Levofloxacin                                       |                                              | >4                       | >4                | 0.06->4     | 9.7                        |
| Multidrug-resistant, MBL-negative (194)            |                                              | Ceftazidime-avibactam    | 0.25              | 1           | ≤0.015-8                   |
|                                                    | Ceftazidime                                  | 32                       | 128               | 0.12->128   | 8.8                        |
|                                                    | Cefepime                                     | >16                      | >16               | 0.5->16     | 3.1                        |
|                                                    | Aztreonam                                    | 64                       | >128              | ≤0.015->128 | 3.6                        |
|                                                    | Piperacillin-tazobactam                      | 16                       | >128              | ≤0.25->128  | 52.1                       |
|                                                    | Doripenem                                    | 0.06                     | 2                 | 0.015->4    | 89.7                       |
|                                                    | Imipenem                                     | 0.25                     | 4                 | 0.12->8     | 83.5                       |
|                                                    | Meropenem                                    | 0.06                     | 1                 | 0.015->8    | 90.2                       |
|                                                    | Amikacin                                     | 8                        | >32               | ≤0.25->32   | 77.3                       |
|                                                    | Colistin (n=116) <sup>d</sup>                | 0.5                      | >4                | ≤0.12->4    | 87.9                       |
|                                                    | Tigecycline                                  | 0.5                      | 2                 | 0.06->8     | 94.3                       |
|                                                    | Levofloxacin                                 | >4                       | >4                | 0.06->4     | 9.3                        |
|                                                    | <i>Escherichia coli</i> <sup>g</sup>         |                          |                   |             |                            |
| All (416) <sup>e</sup>                             | Ceftazidime-avibactam                        | 0.12                     | 0.25              | ≤0.015-8    | 100                        |
|                                                    | Ceftazidime                                  | 0.25                     | 32                | 0.03->128   | 72.6                       |

| Organism, phenotype (no. of isolates) <sup>a</sup> | Antimicrobial agent                            | MIC (µg/ml) <sup>b</sup> |                   |             | % Susceptible <sup>c</sup> |      |
|----------------------------------------------------|------------------------------------------------|--------------------------|-------------------|-------------|----------------------------|------|
|                                                    |                                                | MIC <sub>50</sub>        | MIC <sub>90</sub> | Range       |                            |      |
|                                                    | Cefepime                                       | ≤0.12                    | >16               | ≤0.12->16   | 71.2                       |      |
|                                                    | Aztreonam                                      | 0.12                     | 64                | ≤0.015->128 | 70.0                       |      |
|                                                    | Piperacillin-tazobactam                        | 4                        | 32                | 0.5->128    | 88.9                       |      |
|                                                    | Doripenem                                      | 0.03                     | 0.06              | 0.015-0.25  | 100                        |      |
|                                                    | Imipenem                                       | 0.12                     | 0.25              | ≤0.03-1     | 100                        |      |
|                                                    | Meropenem                                      | 0.03                     | 0.03              | 0.008-0.12  | 100                        |      |
|                                                    | Amikacin                                       | 4                        | 16                | 0.5->32     | 98.1                       |      |
|                                                    | Colistin (n=236) <sup>d</sup>                  | 0.5                      | 1                 | ≤0.12-4     | 99.6                       |      |
|                                                    | Tigecycline                                    | 0.25                     | 0.5               | ≤0.015-1    | 100                        |      |
|                                                    | Levofloxacin                                   | >4                       | >4                | ≤0.03->4    | 46.4                       |      |
|                                                    | Ceftazidime non-susceptible (114) <sup>e</sup> | Ceftazidime-avibactam    | 0.25              | 0.5         | ≤0.015-8                   | 100  |
|                                                    |                                                | Ceftazidime              | 32                | 128         | 8->128                     | 0    |
|                                                    |                                                | Cefepime                 | >16               | >16         | ≤0.12->16                  | 9.7  |
|                                                    |                                                | Aztreonam                | 64                | 128         | 0.12->128                  | 2.6  |
| Piperacillin-tazobactam                            |                                                | 8                        | 64                | 0.5->128    | 78.1                       |      |
| Doripenem                                          |                                                | 0.03                     | 0.06              | 0.015-0.12  | 100                        |      |
| Imipenem                                           |                                                | 0.12                     | 0.25              | 0.12-1      | 100                        |      |
| Meropenem                                          |                                                | 0.03                     | 0.06              | 0.015-0.12  | 100                        |      |
| Amikacin                                           |                                                | 8                        | 16                | 0.5->32     | 96.5                       |      |
| Colistin (n=63) <sup>d</sup>                       |                                                | 0.5                      | 1                 | ≤0.12-2     | 100                        |      |
| Tigecycline                                        |                                                | 0.25                     | 0.5               | 0.06-1      | 100                        |      |
| Levofloxacin                                       |                                                | >4                       | >4                | ≤0.03->4    | 6.1                        |      |
| Colistin-resistant (1) <sup>e</sup>                |                                                | Ceftazidime-avibactam    | — <sup>b</sup>    | —           | 0.12                       | 100  |
|                                                    |                                                | Ceftazidime              | —                 | —           | 0.25                       | 100  |
|                                                    | Cefepime                                       | —                        | —                 | ≤0.12       | 100                        |      |
|                                                    | Aztreonam                                      | —                        | —                 | 0.12        | 100                        |      |
|                                                    | Piperacillin-tazobactam                        | —                        | —                 | 4           | 100                        |      |
|                                                    | Doripenem                                      | —                        | —                 | 0.06        | 100                        |      |
|                                                    | Imipenem                                       | —                        | —                 | 0.25        | 100                        |      |
|                                                    | Meropenem                                      | —                        | —                 | 0.03        | 100                        |      |
|                                                    | Amikacin                                       | —                        | —                 | 4           | 100                        |      |
|                                                    | Colistin (n=1) <sup>d</sup>                    | —                        | —                 | 4           | 0                          |      |
|                                                    | Tigecycline                                    | —                        | —                 | 0.5         | 100                        |      |
|                                                    | Levofloxacin                                   | —                        | —                 | >4          | 0                          |      |
|                                                    | Multidrug-resistant (96) <sup>e</sup>          | Ceftazidime-avibactam    | 0.25              | 0.5         | 0.03-8                     | 100  |
|                                                    |                                                | Ceftazidime              | 32                | 128         | 0.5->128                   | 3.1  |
| Cefepime                                           |                                                | >16                      | >16               | 1->16       | 1.0                        |      |
| Aztreonam                                          |                                                | 64                       | 128               | 0.12->128   | 1.0                        |      |
| Piperacillin-tazobactam                            |                                                | 8                        | 128               | 0.5->128    | 76.0                       |      |
| Doripenem                                          |                                                | 0.03                     | 0.06              | 0.015-0.12  | 100                        |      |
| Imipenem                                           |                                                | 0.12                     | 0.25              | 0.12-0.5    | 100                        |      |
| Meropenem                                          |                                                | 0.03                     | 0.06              | 0.015-0.12  | 100                        |      |
| Amikacin                                           |                                                | 8                        | 16                | 0.5->32     | 94.8                       |      |
| Colistin (n=55) <sup>d</sup>                       |                                                | 0.5                      | 1                 | ≤0.12-2     | 100                        |      |
| Tigecycline                                        |                                                | 0.25                     | 0.5               | 0.06-1      | 100                        |      |
| Levofloxacin                                       |                                                | >4                       | >4                | >4->4       | 0                          |      |
| <i>Klebsiella pneumoniae</i>                       |                                                |                          |                   |             |                            |      |
| All (319)                                          |                                                | Ceftazidime-avibactam    | 0.12              | 0.5         | ≤0.015->128                | 99.4 |
|                                                    | Ceftazidime                                    | 0.25                     | 128               | 0.03->128   | 68.3                       |      |
|                                                    | Cefepime                                       | ≤0.12                    | >16               | ≤0.12->16   | 71.8                       |      |
|                                                    | Aztreonam                                      | 0.12                     | 128               | ≤0.015->128 | 66.8                       |      |
|                                                    | Piperacillin-tazobactam                        | 4                        | >128              | ≤0.25->128  | 73.0                       |      |
|                                                    | Doripenem                                      | 0.06                     | 0.12              | 0.015->4    | 95.0                       |      |
|                                                    | Imipenem                                       | 0.25                     | 0.5               | 0.06->8     | 94.4                       |      |
|                                                    | Meropenem                                      | 0.03                     | 0.12              | 0.008->8    | 95.0                       |      |
|                                                    | Amikacin                                       | 1                        | 32                | ≤0.25->32   | 88.7                       |      |
|                                                    | Colistin (n=198) <sup>d</sup>                  | 0.5                      | 1                 | 0.25->4     | 99.0                       |      |
|                                                    | Tigecycline                                    | 0.5                      | 1                 | 0.06->8     | 97.5                       |      |
|                                                    | Levofloxacin                                   | 0.06                     | >4                | ≤0.03->4    | 71.8                       |      |



| Organism, phenotype (no. of isolates) <sup>a</sup> | Antimicrobial agent               | MIC (µg/ml) <sup>b</sup> |                   |             | % Susceptible <sup>c</sup> |
|----------------------------------------------------|-----------------------------------|--------------------------|-------------------|-------------|----------------------------|
|                                                    |                                   | MIC <sub>50</sub>        | MIC <sub>90</sub> | Range       |                            |
| All, MBL-negative (317)                            | Ceftazidime-avibactam             | 0.12                     | 0.5               | ≤0.015–2    | 100                        |
|                                                    | Ceftazidime                       | 0.25                     | 128               | 0.03–>128   | 68.8                       |
|                                                    | Cefepime                          | ≤0.12                    | >16               | ≤0.12–>16   | 72.2                       |
|                                                    | Aztreonam                         | 0.12                     | 128               | ≤0.015–>128 | 67.2                       |
|                                                    | Piperacillin-tazobactam           | 4                        | >128              | ≤0.25–>128  | 73.5                       |
|                                                    | Doripenem                         | 0.06                     | 0.12              | 0.015–>4    | 95.6                       |
|                                                    | Imipenem                          | 0.25                     | 0.5               | 0.06–>8     | 95.0                       |
|                                                    | Meropenem                         | 0.03                     | 0.12              | 0.008–>8    | 95.6                       |
|                                                    | Amikacin                          | 1                        | 32                | ≤0.25–>32   | 88.6                       |
|                                                    | Colistin (n=196) <sup>d</sup>     | 0.5                      | 1                 | 0.25–>4     | 99.0                       |
|                                                    | Tigecycline                       | 0.5                      | 1                 | 0.06–>8     | 97.5                       |
|                                                    | Levofloxacin                      | 0.06                     | >4                | ≤0.03–>4    | 71.9                       |
|                                                    | Ceftazidime non-susceptible (101) | Ceftazidime-avibactam    | 0.25              | 1           | ≤0.015–>128                |
| Ceftazidime                                        |                                   | 64                       | >128              | 8–>128      | 0                          |
| Cefepime                                           |                                   | >16                      | >16               | 0.25–>16    | 15.8                       |
| Aztreonam                                          |                                   | 128                      | >128              | 4–>128      | 1.0                        |
| Piperacillin-tazobactam                            |                                   | 128                      | >128              | 0.5–>128    | 31.7                       |
| Doripenem                                          |                                   | 0.06                     | 4                 | 0.015–>4    | 85.2                       |
| Imipenem                                           |                                   | 0.25                     | 8                 | 0.12–>8     | 85.2                       |
| Meropenem                                          |                                   | 0.06                     | 4                 | 0.03–>8     | 85.2                       |
| Amikacin                                           |                                   | 8                        | >32               | ≤0.25–>32   | 64.4                       |
| Colistin (n=64) <sup>d</sup>                       |                                   | 0.5                      | 1                 | 0.25–4      | 98.4                       |
| Tigecycline                                        |                                   | 0.5                      | 2                 | 0.25–>8     | 95.1                       |
| Levofloxacin                                       |                                   | >4                       | >4                | ≤0.03–>4    | 28.7                       |
| Ceftazidime non-susceptible (99)                   |                                   | Ceftazidime-avibactam    | 0.25              | 1           | ≤0.015–2                   |
|                                                    | Ceftazidime                       | 64                       | >128              | 8–>128      | 0                          |
|                                                    | Cefepime                          | >16                      | >16               | 0.25–>16    | 16.2                       |
|                                                    | Aztreonam                         | 128                      | >128              | 4–>128      | 1.0                        |
|                                                    | Piperacillin-tazobactam           | 128                      | >128              | 0.5–>128    | 32.3                       |
|                                                    | Doripenem                         | 0.06                     | 4                 | 0.015–>4    | 86.9                       |
|                                                    | Imipenem                          | 0.25                     | 8                 | 0.12–>8     | 86.9                       |
|                                                    | Meropenem                         | 0.06                     | 4                 | 0.03–>8     | 86.9                       |
|                                                    | Amikacin                          | 8                        | >32               | ≤0.25–>32   | 63.6                       |
|                                                    | Colistin (n=62) <sup>d</sup>      | 0.5                      | 1                 | 0.25–4      | 98.4                       |
|                                                    | Tigecycline                       | 0.5                      | 2                 | 0.25–>8     | 95.0                       |
|                                                    | Levofloxacin                      | >4                       | >4                | ≤0.03–>4    | 28.3                       |
|                                                    | Meropenem non-susceptible (16)    | Ceftazidime-avibactam    | 0.5               | 64          | 0.03–>128                  |
| Ceftazidime                                        |                                   | 64                       | >128              | 2–>128      | 6.3                        |
| Cefepime                                           |                                   | 8                        | >16               | 2–>16       | 6.3                        |
| Aztreonam                                          |                                   | 128                      | >128              | 32–>128     | 0                          |
| Piperacillin-tazobactam                            |                                   | >128                     | >128              | 4–>128      | 6.3                        |
| Doripenem                                          |                                   | 4                        | >4                | 2–>4        | 0                          |
| Imipenem                                           |                                   | 8                        | >8                | 1–>8        | 6.3                        |
| Meropenem                                          |                                   | >8                       | >8                | 2–>8        | 0                          |
| Amikacin                                           |                                   | 8                        | >32               | 0.5–>32     | 56.3                       |
| Colistin (n=10) <sup>d</sup>                       |                                   | 0.5                      | 1                 | 0.25–2      | 100                        |
| Tigecycline                                        |                                   | 0.5                      | 2                 | 0.5–2       | 100                        |
| Levofloxacin                                       |                                   | >4                       | >4                | 0.06–>4     | 31.3                       |
| Meropenem non-susceptible, MBL-negative (14)       |                                   | Ceftazidime-avibactam    | 0.5               | 2           | 0.03–2                     |
|                                                    | Ceftazidime                       | 32                       | >128              | 2–>128      | 7.1                        |
|                                                    | Cefepime                          | 8                        | >16               | 2–>16       | 7.1                        |
|                                                    | Aztreonam                         | 128                      | >128              | 32–>128     | 0                          |
|                                                    | Piperacillin-tazobactam           | >128                     | >128              | 4–>128      | 7.1                        |
|                                                    | Doripenem                         | 4                        | >4                | 2–>4        | 0                          |
|                                                    | Imipenem                          | 8                        | >8                | 1–>8        | 7.1                        |
|                                                    | Meropenem                         | 8                        | >8                | 2–>8        | 0                          |
|                                                    | Amikacin                          | 8                        | >32               | 0.5–>32     | 50.0                       |
|                                                    | Colistin (n=8) <sup>d</sup>       | 0.5                      | 2                 | 0.25–2      | 100                        |
|                                                    | Tigecycline                       | 0.5                      | 1                 | 0.5–2       | 100                        |
|                                                    | Levofloxacin                      | >4                       | >4                | 0.06–>4     | 28.6                       |

| Organism, phenotype (no. of isolates) <sup>a</sup> | Antimicrobial agent                           | MIC (µg/ml) <sup>b</sup> |                   |             | % Susceptible <sup>c</sup> |
|----------------------------------------------------|-----------------------------------------------|--------------------------|-------------------|-------------|----------------------------|
|                                                    |                                               | MIC <sub>50</sub>        | MIC <sub>90</sub> | Range       |                            |
| Colistin-resistant (2) <sup>e</sup>                | Ceftazidime-avibactam                         | — <sup>b</sup>           | —                 | 0.12–0.5    | 100                        |
|                                                    | Ceftazidime                                   | —                        | —                 | 0.5–8       | 50.0                       |
|                                                    | Cefepime                                      | —                        | —                 | ≤0.12–8     | 50.0                       |
|                                                    | Aztreonam                                     | —                        | —                 | 0.12–64     | 50.0                       |
|                                                    | Piperacillin-tazobactam                       | —                        | —                 | 4–8         | 100                        |
|                                                    | Doripenem                                     | —                        | —                 | 0.03–0.06   | 100                        |
|                                                    | Imipenem                                      | —                        | —                 | 0.12–0.25   | 100                        |
|                                                    | Meropenem                                     | —                        | —                 | 0.03–0.06   | 100                        |
|                                                    | Amikacin                                      | —                        | —                 | 0.5–1       | 100                        |
|                                                    | Colistin (n=2) <sup>d</sup>                   | —                        | —                 | 4–>4        | 0                          |
|                                                    | Tigecycline                                   | —                        | —                 | 1–2         | 100                        |
| Levofloxacin                                       | —                                             | —                        | >4–>4             | 0           |                            |
| Multidrug-resistant (69)                           | Ceftazidime-avibactam                         | 0.5                      | 1                 | ≤0.015–>128 | 97.1                       |
|                                                    | Ceftazidime                                   | 64                       | >128              | 2–>128      | 2.9                        |
|                                                    | Cefepime                                      | >16                      | >16               | 1–>16       | 2.9                        |
|                                                    | Aztreonam                                     | 128                      | >128              | 16–>128     | 0                          |
|                                                    | Piperacillin-tazobactam                       | >128                     | >128              | 1–>128      | 15.9                       |
|                                                    | Doripenem                                     | 0.12                     | >4                | 0.015–>4    | 76.8                       |
|                                                    | Imipenem                                      | 0.25                     | >8                | 0.12–>8     | 76.8                       |
|                                                    | Meropenem                                     | 0.06                     | >8                | 0.03–>8     | 76.8                       |
|                                                    | Amikacin                                      | 16                       | >32               | ≤0.25–>32   | 55.1                       |
|                                                    | Colistin (n=42) <sup>d</sup>                  | 0.5                      | 1                 | 0.25–4      | 97.6                       |
|                                                    | Tigecycline                                   | 0.5                      | 2                 | 0.25–>8     | 94.2                       |
|                                                    | Levofloxacin                                  | >4                       | >4                | 0.06–>4     | 13.0                       |
|                                                    | Multidrug-resistant, MBL-negative (67)        | Ceftazidime-avibactam    | 0.5               | 1           | ≤0.015–2                   |
| Ceftazidime                                        |                                               | 64                       | >128              | 2–>128      | 3.0                        |
| Cefepime                                           |                                               | >16                      | >16               | 1–>16       | 3.0                        |
| Aztreonam                                          |                                               | 128                      | >128              | 16–>128     | 0                          |
| Piperacillin-tazobactam                            |                                               | >128                     | >128              | 1–>128      | 16.4                       |
| Doripenem                                          |                                               | 0.12                     | 4                 | 0.015–>4    | 79.1                       |
| Imipenem                                           |                                               | 0.25                     | 8                 | 0.12–>8     | 79.1                       |
| Meropenem                                          |                                               | 0.06                     | >8                | 0.03–>8     | 79.1                       |
| Amikacin                                           |                                               | 16                       | >32               | ≤0.25–>32   | 53.7                       |
| Colistin (n=40) <sup>d</sup>                       |                                               | 0.5                      | 1                 | 0.25–4      | 97.5                       |
| Tigecycline                                        |                                               | 0.5                      | 2                 | 0.25–>8     | 94.0                       |
| Levofloxacin                                       |                                               | >4                       | >4                | 0.06–>4     | 11.9                       |
| <i>Klebsiella oxytoca</i>                          |                                               |                          |                   |             |                            |
| All (77) <sup>e</sup>                              | Ceftazidime-avibactam                         | 0.12                     | 0.5               | 0.03–1      | 100                        |
|                                                    | Ceftazidime                                   | 0.12                     | 64                | 0.03–>128   | 83.1                       |
|                                                    | Cefepime                                      | ≤0.12                    | 16                | ≤0.12–>16   | 83.1                       |
|                                                    | Aztreonam                                     | 0.12                     | 128               | ≤0.015–>128 | 79.2                       |
|                                                    | Piperacillin-tazobactam                       | 2                        | 32                | 0.5–>128    | 88.3                       |
|                                                    | Doripenem                                     | 0.06                     | 0.12              | 0.03–>4     | 97.4                       |
|                                                    | Imipenem                                      | 0.25                     | 0.5               | 0.06–>8     | 96.1                       |
|                                                    | Meropenem                                     | 0.03                     | 0.06              | 0.015–>8    | 97.4                       |
|                                                    | Amikacin                                      | 2                        | 8                 | 0.5–>32     | 96.1                       |
|                                                    | Colistin (n=42) <sup>d</sup>                  | 0.5                      | 1                 | ≤0.12–4     | 97.6                       |
|                                                    | Tigecycline                                   | 0.25                     | 0.5               | 0.06–1      | 100                        |
|                                                    | Levofloxacin                                  | 0.06                     | 0.5               | ≤0.03–>4    | 97.4                       |
|                                                    | Ceftazidime non-susceptible (13) <sup>e</sup> | Ceftazidime-avibactam    | 0.25              | 1           | 0.12–1                     |
| Ceftazidime                                        |                                               | 64                       | >128              | 16–>128     | 0                          |
| Cefepime                                           |                                               | 16                       | >16               | 0.5–>16     | 15.4                       |
| Aztreonam                                          |                                               | 128                      | >128              | 32–>128     | 0                          |
| Piperacillin-tazobactam                            |                                               | 8                        | >128              | 2–>128      | 53.9                       |
| Doripenem                                          |                                               | 0.06                     | >4                | 0.03–>4     | 84.6                       |
| Imipenem                                           |                                               | 0.25                     | 8                 | 0.06–>8     | 84.6                       |
| Meropenem                                          |                                               | 0.06                     | >8                | 0.03–>8     | 84.6                       |
| Amikacin                                           |                                               | 8                        | 32                | 0.5–>32     | 76.9                       |
| Colistin (n=7) <sup>d</sup>                        |                                               | — <sup>b</sup>           | —                 | 0.25–1      | 100                        |

| Organism, phenotype (no. of isolates) <sup>a</sup> | Antimicrobial agent          | MIC (µg/ml) <sup>b</sup> |                   |             | % Susceptible <sup>c</sup> |
|----------------------------------------------------|------------------------------|--------------------------|-------------------|-------------|----------------------------|
|                                                    |                              | MIC <sub>50</sub>        | MIC <sub>90</sub> | Range       |                            |
|                                                    | Tigecycline                  | 0.25                     | 1                 | 0.06–1      | 100                        |
|                                                    | Levofloxacin                 | 0.5                      | 2                 | 0.06–2      | 100                        |
| Meropenem non-susceptible (2) <sup>e</sup>         | Ceftazidime-avibactam        | — <sup>b</sup>           | —                 | 0.5–1       | 100                        |
|                                                    | Ceftazidime                  | —                        | —                 | 32->128     | 0                          |
|                                                    | Cefepime                     | —                        | —                 | 8->16       | 0                          |
|                                                    | Aztreonam                    | —                        | —                 | >128->128   | 0                          |
|                                                    | Piperacillin-tazobactam      | —                        | —                 | >128->128   | 0                          |
|                                                    | Doripenem                    | —                        | —                 | >4->4       | 0                          |
|                                                    | Imipenem                     | —                        | —                 | 8->8        | 0                          |
|                                                    | Meropenem                    | —                        | —                 | >8->8       | 0                          |
|                                                    | Amikacin                     | —                        | —                 | 2–32        | 50.0                       |
|                                                    | Colistin (n=2) <sup>d</sup>  | —                        | —                 | 0.25–0.5    | 100                        |
|                                                    | Tigecycline                  | —                        | —                 | 0.5–1       | 100                        |
|                                                    | Levofloxacin                 | —                        | —                 | 0.12–2      | 100                        |
| Colistin-resistant (1) <sup>e</sup>                | Ceftazidime-avibactam        | — <sup>b</sup>           | —                 | 0.12        | 100                        |
|                                                    | Ceftazidime                  | —                        | —                 | 0.25        | 100                        |
|                                                    | Cefepime                     | —                        | —                 | ≤0.12       | 100                        |
|                                                    | Aztreonam                    | —                        | —                 | 0.25        | 100                        |
|                                                    | Piperacillin-tazobactam      | —                        | —                 | 2           | 100                        |
|                                                    | Doripenem                    | —                        | —                 | 0.06        | 100                        |
|                                                    | Imipenem                     | —                        | —                 | 0.25        | 100                        |
|                                                    | Meropenem                    | —                        | —                 | 0.06        | 100                        |
|                                                    | Amikacin                     | —                        | —                 | 2           | 100                        |
|                                                    | Colistin (n=1) <sup>d</sup>  | —                        | —                 | 4           | 0                          |
|                                                    | Tigecycline                  | —                        | —                 | 0.5         | 100                        |
|                                                    | Levofloxacin                 | —                        | —                 | 0.06        | 100                        |
| Multidrug-resistant (4) <sup>e</sup>               | Ceftazidime-avibactam        | — <sup>b</sup>           | —                 | 0.5–1       | 100                        |
|                                                    | Ceftazidime                  | —                        | —                 | 2->128      | 25.0                       |
|                                                    | Cefepime                     | —                        | —                 | 8->16       | 0                          |
|                                                    | Aztreonam                    | —                        | —                 | 128->128    | 0                          |
|                                                    | Piperacillin-tazobactam      | —                        | —                 | >128->128   | 0                          |
|                                                    | Doripenem                    | —                        | —                 | 0.12->4     | 50.0                       |
|                                                    | Imipenem                     | —                        | —                 | 0.25->8     | 50.0                       |
|                                                    | Meropenem                    | —                        | —                 | 0.06->8     | 50.0                       |
|                                                    | Amikacin                     | —                        | —                 | 2–32        | 75.0                       |
|                                                    | Colistin (n=3) <sup>d</sup>  | —                        | —                 | 0.25–0.5    | 100                        |
|                                                    | Tigecycline                  | —                        | —                 | 0.5–1       | 100                        |
|                                                    | Levofloxacin                 | —                        | —                 | 0.12–2      | 100                        |
| <i>Enterobacter</i> spp.                           |                              |                          |                   |             |                            |
| All (136) <sup>e,h</sup>                           | Ceftazidime-avibactam        | 0.12                     | 0.5               | ≤0.015–4    | 100                        |
|                                                    | Ceftazidime                  | 0.25                     | 64                | 0.03->128   | 79.4                       |
|                                                    | Cefepime                     | ≤0.12                    | 8                 | ≤0.12->16   | 87.5                       |
|                                                    | Aztreonam                    | 0.12                     | 64                | ≤0.015->128 | 78.7                       |
|                                                    | Piperacillin-tazobactam      | 4                        | 32                | ≤0.25->128  | 89.7                       |
|                                                    | Doripenem                    | 0.06                     | 0.12              | ≤0.008->4   | 98.5                       |
|                                                    | Imipenem                     | 0.5                      | 2                 | 0.12->8     | 80.9                       |
|                                                    | Meropenem                    | 0.06                     | 0.06              | 0.015->8    | 99.3                       |
|                                                    | Amikacin                     | 1                        | 4                 | 0.5->32     | 95.6                       |
|                                                    | Colistin (n=79) <sup>d</sup> | 0.5                      | >4                | 0.25->4     | 88.6                       |
|                                                    | Tigecycline                  | 0.5                      | 1                 | 0.25–2      | 100                        |
|                                                    | Levofloxacin                 | 0.06                     | 1                 | ≤0.03->4    | 94.9                       |
| Ceftazidime non-susceptible (28) <sup>e</sup>      | Ceftazidime-avibactam        | 0.25                     | 1                 | 0.06–4      | 100                        |
|                                                    | Ceftazidime                  | 64                       | 128               | 8->128      | 0                          |
|                                                    | Cefepime                     | 4                        | >16               | ≤0.12->16   | 39.3                       |
|                                                    | Aztreonam                    | 64                       | >128              | 8->128      | 0                          |
|                                                    | Piperacillin-tazobactam      | 16                       | >128              | 2->128      | 53.6                       |
|                                                    | Doripenem                    | 0.06                     | 0.25              | 0.06->4     | 92.9                       |
|                                                    | Imipenem                     | 0.5                      | 2                 | 0.12->8     | 89.3                       |
|                                                    | Meropenem                    | 0.06                     | 0.12              | 0.03->8     | 96.4                       |

| Organism, phenotype (no. of isolates) <sup>a</sup> | Antimicrobial agent          | MIC (µg/ml) <sup>b</sup> |                   |           | % Susceptible <sup>c</sup> |
|----------------------------------------------------|------------------------------|--------------------------|-------------------|-----------|----------------------------|
|                                                    |                              | MIC <sub>50</sub>        | MIC <sub>90</sub> | Range     |                            |
|                                                    | Amikacin                     | 2                        | >32               | 0.5->32   | 78.6                       |
|                                                    | Colistin (n=14) <sup>d</sup> | 0.5                      | 1                 | 0.25->4   | 92.9                       |
|                                                    | Tigecycline                  | 0.5                      | 1                 | 0.25-2    | 100                        |
|                                                    | Levofloxacin                 | 0.25                     | >4                | ≤0.03->4  | 89.3                       |
| Meropenem non-susceptible (1) <sup>e</sup>         | Ceftazidime-avibactam        | — <sup>b</sup>           | —                 | 1         | 100                        |
|                                                    | Ceftazidime                  | —                        | —                 | 32        | 0                          |
|                                                    | Cefepime                     | —                        | —                 | >16       | 0                          |
|                                                    | Aztreonam                    | —                        | —                 | >128      | 0                          |
|                                                    | Piperacillin-tazobactam      | —                        | —                 | >128      | 0                          |
|                                                    | Doripenem                    | —                        | —                 | >4        | 0                          |
|                                                    | Imipenem                     | —                        | —                 | >8        | 0                          |
|                                                    | Meropenem                    | —                        | —                 | >8        | 0                          |
|                                                    | Amikacin                     | —                        | —                 | 2         | 100                        |
|                                                    | Colistin (n=1) <sup>d</sup>  | —                        | —                 | 0.5       | 100                        |
|                                                    | Tigecycline                  | —                        | —                 | 2         | 100                        |
|                                                    | Levofloxacin                 | —                        | —                 | >4        | 0                          |
| Colistin-resistant (9) <sup>e</sup>                | Ceftazidime-avibactam        | — <sup>b</sup>           | —                 | 0.06-0.5  | 100                        |
|                                                    | Ceftazidime                  | —                        | —                 | 0.25-8    | 88.9                       |
|                                                    | Cefepime                     | —                        | —                 | ≤0.12->16 | 88.9                       |
|                                                    | Aztreonam                    | —                        | —                 | 0.06-16   | 88.9                       |
|                                                    | Piperacillin-tazobactam      | —                        | —                 | 2-16      | 100                        |
|                                                    | Doripenem                    | —                        | —                 | 0.03-0.25 | 100                        |
|                                                    | Imipenem                     | —                        | —                 | 0.5-2     | 88.9                       |
|                                                    | Meropenem                    | —                        | —                 | 0.03-0.12 | 100                        |
|                                                    | Amikacin                     | —                        | —                 | 1-4       | 100                        |
|                                                    | Colistin (n=9) <sup>d</sup>  | —                        | —                 | 4->4      | 0                          |
|                                                    | Tigecycline                  | —                        | —                 | 0.25-1    | 100                        |
|                                                    | Levofloxacin                 | —                        | —                 | ≤0.03-2   | 100                        |
| Multidrug-resistant (8) <sup>e</sup>               | Ceftazidime-avibactam        | — <sup>b</sup>           | —                 | 0.06-4    | 100                        |
|                                                    | Ceftazidime                  | —                        | —                 | 8->128    | 0                          |
|                                                    | Cefepime                     | —                        | —                 | >16->16   | 0                          |
|                                                    | Aztreonam                    | —                        | —                 | 16->128   | 0                          |
|                                                    | Piperacillin-tazobactam      | —                        | —                 | 4->128    | 25.0                       |
|                                                    | Doripenem                    | —                        | —                 | 0.06->4   | 75.0                       |
|                                                    | Imipenem                     | —                        | —                 | 0.5->8    | 75.0                       |
|                                                    | Meropenem                    | —                        | —                 | 0.06->8   | 87.5                       |
|                                                    | Amikacin                     | —                        | —                 | 0.5->32   | 62.5                       |
|                                                    | Colistin (n=4) <sup>d</sup>  | —                        | —                 | 0.25->4   | 75.0                       |
|                                                    | Tigecycline                  | —                        | —                 | 0.25-2    | 100                        |
|                                                    | Levofloxacin                 | —                        | —                 | 0.06->4   | 62.5                       |
| <i>Citrobacter</i> spp. <sup>j</sup>               |                              |                          |                   |           |                            |
| All (66) <sup>e,i</sup>                            | Ceftazidime-avibactam        | 0.12                     | 0.25              | 0.03-0.5  | 100                        |
|                                                    | Ceftazidime                  | 0.25                     | 64                | 0.06->128 | 78.8                       |
|                                                    | Cefepime                     | ≤0.12                    | 2                 | ≤0.12->16 | 90.9                       |
|                                                    | Aztreonam                    | 0.12                     | 64                | 0.03->128 | 78.8                       |
|                                                    | Piperacillin-tazobactam      | 4                        | 32                | 0.5->128  | 89.4                       |
|                                                    | Doripenem                    | 0.03                     | 0.06              | 0.015-4   | 98.5                       |
|                                                    | Imipenem                     | 0.5                      | 2                 | 0.06-4    | 83.3                       |
|                                                    | Meropenem                    | 0.03                     | 0.06              | ≤0.004-4  | 98.5                       |
|                                                    | Amikacin                     | 2                        | 4                 | 0.5->32   | 97.0                       |
|                                                    | Colistin (n=35) <sup>d</sup> | 0.5                      | 1                 | ≤0.12-1   | 100                        |
|                                                    | Tigecycline                  | 0.25                     | 0.5               | 0.06-2    | 100                        |
|                                                    | Levofloxacin                 | 0.06                     | >4                | ≤0.03->4  | 86.4                       |
| Ceftazidime non-susceptible (14) <sup>e</sup>      | Ceftazidime-avibactam        | 0.25                     | 0.5               | 0.12-0.5  | 100                        |
|                                                    | Ceftazidime                  | 64                       | >128              | 16->128   | 0                          |
|                                                    | Cefepime                     | 1                        | >16               | 0.25->16  | 57.1                       |
|                                                    | Aztreonam                    | 32                       | >128              | 4->128    | 7.1                        |
|                                                    | Piperacillin-tazobactam      | 8                        | >128              | 2->128    | 71.4                       |
|                                                    | Doripenem                    | 0.06                     | 0.25              | 0.03-4    | 92.9                       |

| Organism, phenotype (no. of isolates) <sup>a</sup> | Antimicrobial agent          | MIC (µg/ml) <sup>b</sup> |                   |            | % Susceptible <sup>c</sup> |
|----------------------------------------------------|------------------------------|--------------------------|-------------------|------------|----------------------------|
|                                                    |                              | MIC <sub>50</sub>        | MIC <sub>90</sub> | Range      |                            |
|                                                    | Imipenem                     | 1                        | 2                 | 0.12–4     | 71.4                       |
|                                                    | Meropenem                    | 0.06                     | 0.12              | 0.03–4     | 92.9                       |
|                                                    | Amikacin                     | 2                        | 8                 | 1–>32      | 92.9                       |
|                                                    | Colistin (n=9) <sup>d</sup>  | — <sup>b</sup>           | —                 | 0.25–1     | 100                        |
|                                                    | Tigecycline                  | 0.25                     | 0.5               | 0.06–1     | 100                        |
|                                                    | Levofloxacin                 | 1                        | >4                | 0.06–>4    | 64.3                       |
| Meropenem non-susceptible (1) <sup>e</sup>         | Ceftazidime-avibactam        | — <sup>b</sup>           | —                 | 0.5        | 100                        |
|                                                    | Ceftazidime                  | —                        | —                 | >128       | 0                          |
|                                                    | Cefepime                     | —                        | —                 | >16        | 0                          |
|                                                    | Aztreonam                    | —                        | —                 | >128       | 0                          |
|                                                    | Piperacillin-tazobactam      | —                        | —                 | >128       | 0                          |
|                                                    | Doripenem                    | —                        | —                 | 4          | 0                          |
|                                                    | Imipenem                     | —                        | —                 | 4          | 0                          |
|                                                    | Meropenem                    | —                        | —                 | 4          | 0                          |
|                                                    | Amikacin                     | —                        | —                 | 2          | 100                        |
|                                                    | Colistin (n=1) <sup>d</sup>  | —                        | —                 | 1          | 100                        |
|                                                    | Tigecycline                  | —                        | —                 | 0.5        | 100                        |
|                                                    | Levofloxacin                 | —                        | —                 | >4         | 0                          |
| Multidrug-resistant (4) <sup>e</sup>               | Ceftazidime-avibactam        | — <sup>b</sup>           | —                 | 0.12–0.5   | 100                        |
|                                                    | Ceftazidime                  | —                        | —                 | 32–>128    | 0                          |
|                                                    | Cefepime                     | —                        | —                 | 1–>16      | 25.0                       |
|                                                    | Aztreonam                    | —                        | —                 | 16–>128    | 0                          |
|                                                    | Piperacillin-tazobactam      | —                        | —                 | 2–>128     | 50.0                       |
|                                                    | Doripenem                    | —                        | —                 | 0.03–4     | 75.0                       |
|                                                    | Imipenem                     | —                        | —                 | 0.12–4     | 75.0                       |
|                                                    | Meropenem                    | —                        | —                 | 0.03–4     | 75.0                       |
|                                                    | Amikacin                     | —                        | —                 | 1–>32      | 75.0                       |
|                                                    | Colistin (n=2) <sup>d</sup>  | —                        | —                 | 0.5–1      | 100                        |
|                                                    | Tigecycline                  | —                        | —                 | 0.25–0.5   | 100                        |
|                                                    | Levofloxacin                 | —                        | —                 | 0.06–>4    | 25.0                       |
| <b>Proteaceae</b>                                  |                              |                          |                   |            |                            |
| All (143) <sup>e,k</sup>                           | Ceftazidime-avibactam        | 0.06                     | 0.12              | ≤0.015–0.5 | 100                        |
|                                                    | Ceftazidime                  | 0.06                     | 4                 | ≤0.015–64  | 92.3                       |
|                                                    | Cefepime                     | ≤0.12                    | 8                 | ≤0.12–>16  | 87.4                       |
|                                                    | Aztreonam                    | ≤0.015                   | 1                 | ≤0.015–128 | 95.1                       |
|                                                    | Piperacillin-tazobactam      | 0.5                      | 2                 | ≤0.25–>128 | 97.9                       |
|                                                    | Doripenem                    | 0.25                     | 0.5               | 0.06–2     | 98.6                       |
|                                                    | Imipenem                     | 2                        | 4                 | 0.5–>8     | 17.5                       |
|                                                    | Meropenem                    | 0.12                     | 0.12              | 0.03–2     | 99.3                       |
|                                                    | Amikacin                     | 4                        | 8                 | 0.5–>32    | 95.8                       |
|                                                    | Colistin (n=83) <sup>d</sup> | >4                       | >4                | 0.5–>4     | 2.4                        |
|                                                    | Tigecycline                  | 2                        | 4                 | 0.12–>8    | 59.4                       |
|                                                    | Levofloxacin                 | 0.5                      | >4                | ≤0.03–>4   | 68.5                       |
| Ceftazidime-non-susceptible (11) <sup>e</sup>      | Ceftazidime-avibactam        | 0.12                     | 0.25              | 0.06–0.25  | 100                        |
|                                                    | Ceftazidime                  | 32                       | 64                | 8–64       | 0                          |
|                                                    | Cefepime                     | 0.5                      | 2                 | ≤0.12–2    | 100                        |
|                                                    | Aztreonam                    | 2                        | 4                 | 0.5–8      | 90.9                       |
|                                                    | Piperacillin-tazobactam      | 2                        | 4                 | ≤0.25–8    | 100                        |
|                                                    | Doripenem                    | 0.25                     | 0.5               | 0.12–0.5   | 100                        |
|                                                    | Imipenem                     | 2                        | 4                 | 1–4        | 9.1                        |
|                                                    | Meropenem                    | 0.12                     | 0.25              | 0.12–0.25  | 100                        |
|                                                    | Amikacin                     | 8                        | >32               | 2–>32      | 63.6                       |
|                                                    | Colistin (n=9) <sup>d</sup>  | — <sup>b</sup>           | —                 | 1–>4       | 11.1                       |
|                                                    | Tigecycline                  | 4                        | 4                 | 1–>8       | 36.4                       |
|                                                    | Levofloxacin                 | 4                        | >4                | 0.06–>4    | 45.5                       |
| Meropenem non-susceptible (1) <sup>e</sup>         | Ceftazidime-avibactam        | — <sup>b</sup>           | —                 | 0.5        | 100                        |
|                                                    | Ceftazidime                  | —                        | —                 | 4          | 100                        |
|                                                    | Cefepime                     | —                        | —                 | >16        | 0                          |
|                                                    | Aztreonam                    | —                        | —                 | 4          | 100                        |

| Organism, phenotype (no. of isolates) <sup>a</sup> | Antimicrobial agent          | MIC (µg/ml) <sup>b</sup> |                   |            | % Susceptible <sup>c</sup> |
|----------------------------------------------------|------------------------------|--------------------------|-------------------|------------|----------------------------|
|                                                    |                              | MIC <sub>50</sub>        | MIC <sub>90</sub> | Range      |                            |
|                                                    | Piperacillin-tazobactam      | —                        | —                 | 4          | 100                        |
|                                                    | Doripenem                    | —                        | —                 | 2          | 0                          |
|                                                    | Imipenem                     | —                        | —                 | 4          | 0                          |
|                                                    | Meropenem                    | —                        | —                 | 2          | 0                          |
|                                                    | Amikacin                     | —                        | —                 | 2          | 100                        |
|                                                    | Colistin (n=1) <sup>d</sup>  | —                        | —                 | >4         | 0                          |
|                                                    | Tigecycline                  | —                        | —                 | 2          | 100                        |
|                                                    | Levofloxacin                 | —                        | —                 | >4         | 0                          |
| Multidrug-resistant (13) <sup>e</sup>              | Ceftazidime-avibactam        | 0.06                     | 0.25              | 0.03–0.5   | 100                        |
|                                                    | Ceftazidime                  | 0.5                      | 32                | 0.12–64    | 84.6                       |
|                                                    | Cefepime                     | >16                      | >16               | 0.5–>16    | 15.4                       |
|                                                    | Aztreonam                    | 8                        | 128               | ≤0.015–128 | 46.2                       |
|                                                    | Piperacillin-tazobactam      | 2                        | >128              | ≤0.25–>128 | 84.6                       |
|                                                    | Doripenem                    | 0.25                     | 1                 | 0.25–2     | 92.3                       |
|                                                    | Imipenem                     | 4                        | 4                 | 2–4        | 0                          |
|                                                    | Meropenem                    | 0.12                     | 0.25              | 0.06–2     | 92.3                       |
|                                                    | Amikacin                     | 8                        | >32               | 0.5–>32    | 84.6                       |
|                                                    | Colistin (n=10) <sup>d</sup> | >4                       | >4                | >4–>4      | 0                          |
|                                                    | Tigecycline                  | 4                        | 8                 | 0.25–>8    | 46.2                       |
|                                                    | Levofloxacin                 | >4                       | >4                | >4–>4      | 0                          |
|                                                    | <hr/>                        |                          |                   |            |                            |
| Other <i>Enterobacteriaceae</i> <sup>e,j</sup>     |                              |                          |                   |            |                            |
| All (44) <sup>e,i</sup>                            | Ceftazidime-avibactam        | 0.12                     | 0.25              | 0.03–1     | 100                        |
|                                                    | Ceftazidime                  | 0.12                     | 0.5               | 0.03–32    | 95.4                       |
|                                                    | Cefepime                     | ≤0.12                    | 0.25              | ≤0.12–>16  | 95.4                       |
|                                                    | Aztreonam                    | 0.12                     | 0.25              | 0.03–128   | 95.4                       |
|                                                    | Piperacillin-tazobactam      | 2                        | 8                 | 0.5–16     | 100                        |
|                                                    | Doripenem                    | 0.12                     | 0.25              | 0.03–0.25  | 100                        |
|                                                    | Imipenem                     | 0.5                      | 1                 | 0.25–2     | 95.4                       |
|                                                    | Meropenem                    | 0.06                     | 0.06              | 0.03–0.12  | 100                        |
|                                                    | Amikacin                     | 2                        | 4                 | 0.5–>32    | 97.7                       |
|                                                    | Colistin (n=27) <sup>d</sup> | >4                       | >4                | ≤0.12–>4   | 7.4                        |
|                                                    | Tigecycline                  | 1                        | 2                 | 0.06–4     | 95.4                       |
|                                                    | Levofloxacin                 | 0.12                     | 0.5               | ≤0.03–>4   | 95.4                       |
|                                                    | <hr/>                        |                          |                   |            |                            |
| Ceftazidime-non-susceptible (2) <sup>e</sup>       | Ceftazidime-avibactam        | — <sup>b</sup>           | —                 | 0.5–0.5    | 100                        |
|                                                    | Ceftazidime                  | —                        | —                 | 8–32       | 0                          |
|                                                    | Cefepime                     | —                        | —                 | 8–>16      | 0                          |
|                                                    | Aztreonam                    | —                        | —                 | 32–128     | 0                          |
|                                                    | Piperacillin-tazobactam      | —                        | —                 | 8–16       | 100                        |
|                                                    | Doripenem                    | —                        | —                 | 0.12–0.25  | 100                        |
|                                                    | Imipenem                     | —                        | —                 | 0.5–1      | 100                        |
|                                                    | Meropenem                    | —                        | —                 | 0.06–0.12  | 100                        |
|                                                    | Amikacin                     | —                        | —                 | 4–>32      | 50.0                       |
|                                                    | Colistin (n=2) <sup>d</sup>  | —                        | —                 | >4–>4      | 0                          |
|                                                    | Tigecycline                  | —                        | —                 | 1–1        | 100                        |
|                                                    | Levofloxacin                 | —                        | —                 | 4–>4       | 0                          |
|                                                    | <hr/>                        |                          |                   |            |                            |
| Multidrug-resistant (2) <sup>e</sup>               | Ceftazidime-avibactam        | — <sup>b</sup>           | —                 | 0.5–0.5    | 100                        |
|                                                    | Ceftazidime                  | —                        | —                 | 8–32       | 0                          |
|                                                    | Cefepime                     | —                        | —                 | 8–>16      | 0                          |
|                                                    | Aztreonam                    | —                        | —                 | 32–128     | 0                          |
|                                                    | Piperacillin-tazobactam      | —                        | —                 | 8–16       | 100                        |
|                                                    | Doripenem                    | —                        | —                 | 0.12–0.25  | 100                        |
|                                                    | Imipenem                     | —                        | —                 | 0.5–1      | 100                        |
|                                                    | Meropenem                    | —                        | —                 | 0.06–0.12  | 100                        |
|                                                    | Amikacin                     | —                        | —                 | 4–>32      | 50.0                       |
|                                                    | Colistin (n=2) <sup>d</sup>  | —                        | —                 | >4–>4      | 0                          |
|                                                    | Tigecycline                  | —                        | —                 | 1–1        | 100                        |
|                                                    | Levofloxacin                 | —                        | —                 | 4–>4       | 0                          |
|                                                    | <hr/>                        |                          |                   |            |                            |
| <i>Pseudomonas aeruginosa</i> <sup>l</sup>         |                              |                          |                   |            |                            |
| All (297)                                          | Ceftazidime-avibactam        | 2                        | 32                | 0.12–>128  | 83.8                       |

| Organism, phenotype (no. of isolates) <sup>a</sup> | Antimicrobial agent           | MIC (µg/ml) <sup>b</sup> |                   |            | % Susceptible <sup>c</sup> |
|----------------------------------------------------|-------------------------------|--------------------------|-------------------|------------|----------------------------|
|                                                    |                               | MIC <sub>50</sub>        | MIC <sub>90</sub> | Range      |                            |
|                                                    | Ceftazidime                   | 4                        | 32                | 0.5->128   | 75.4                       |
|                                                    | Cefepime                      | 4                        | >16               | 0.25->16   | 75.4                       |
|                                                    | Aztreonam                     | 8                        | 32                | 0.25->128  | 60.3                       |
|                                                    | Piperacillin-tazobactam       | 8                        | 128               | ≤0.25->128 | 70.0                       |
|                                                    | Doripenem                     | 1                        | >4                | 0.06->4    | 69.0                       |
|                                                    | Imipenem                      | 2                        | >8                | 0.25->8    | 60.6                       |
|                                                    | Meropenem                     | 1                        | >8                | ≤0.06->8   | 67.7                       |
|                                                    | Amikacin                      | 4                        | >32               | ≤0.25->32  | 77.1                       |
|                                                    | Colistin (n=217) <sup>d</sup> | 2                        | 2                 | 0.5-4      | 94.9                       |
|                                                    | Levofloxacin                  | 0.5                      | >4                | ≤0.03->4   | 66.7                       |
| All, MBL-negative (249)                            | Ceftazidime-avibactam         | 2                        | 4                 | 0.12-32    | 99.2                       |
|                                                    | Ceftazidime                   | 2                        | 16                | 0.5->128   | 90.0                       |
|                                                    | Cefepime                      | 2                        | 16                | 0.25->16   | 89.2                       |
|                                                    | Aztreonam                     | 8                        | 32                | 0.25->128  | 70.3                       |
|                                                    | Piperacillin-tazobactam       | 8                        | 64                | ≤0.25->128 | 83.5                       |
|                                                    | Doripenem                     | 0.5                      | >4                | 0.06->4    | 82.3                       |
|                                                    | Imipenem                      | 2                        | >8                | 0.25->8    | 72.3                       |
|                                                    | Meropenem                     | 0.5                      | >8                | ≤0.06->8   | 80.7                       |
|                                                    | Amikacin                      | 4                        | 16                | ≤0.25->32  | 91.6                       |
|                                                    | Colistin (n=183) <sup>d</sup> | 2                        | 2                 | 0.5-4      | 94.5                       |
|                                                    | Levofloxacin                  | 0.5                      | >4                | ≤0.03->4   | 78.7                       |
| Ceftazidime-non-susceptible (73)                   | Ceftazidime-avibactam         | 32                       | 32                | 0.12->128  | 34.3                       |
|                                                    | Ceftazidime                   | 32                       | 64                | 16->128    | 0                          |
|                                                    | Cefepime                      | 16                       | >16               | 4->16      | 13.7                       |
|                                                    | Aztreonam                     | 16                       | 64                | 2->128     | 6.9                        |
|                                                    | Piperacillin-tazobactam       | 64                       | >128              | 8->128     | 5.5                        |
|                                                    | Doripenem                     | >4                       | >4                | 0.06->4    | 20.6                       |
|                                                    | Imipenem                      | >8                       | >8                | 0.25->8    | 21.9                       |
|                                                    | Meropenem                     | >8                       | >8                | 0.06->8    | 20.6                       |
|                                                    | Amikacin                      | >32                      | >32               | 2->32      | 28.8                       |
|                                                    | Colistin (n=52) <sup>d</sup>  | 1                        | 2                 | 0.5-4      | 96.2                       |
|                                                    | Levofloxacin                  | >4                       | >4                | 0.06->4    | 20.6                       |
| Ceftazidime-non-susceptible, MBL-negative (25)     | Ceftazidime-avibactam         | 4                        | 8                 | 0.12-32    | 92.0                       |
|                                                    | Ceftazidime                   | 32                       | >128              | 16->128    | 0                          |
|                                                    | Cefepime                      | 16                       | >16               | 4->16      | 32.0                       |
|                                                    | Aztreonam                     | 32                       | >128              | 8->128     | 4.0                        |
|                                                    | Piperacillin-tazobactam       | 128                      | >128              | 8->128     | 16.0                       |
|                                                    | Doripenem                     | 2                        | >4                | 0.06->4    | 60.0                       |
|                                                    | Imipenem                      | 2                        | >8                | 0.25->8    | 64.0                       |
|                                                    | Meropenem                     | 1                        | >8                | 0.06->8    | 60.0                       |
|                                                    | Amikacin                      | 8                        | >32               | 2->32      | 80.0                       |
|                                                    | Colistin (n=18) <sup>d</sup>  | 1                        | 2                 | 0.5-4      | 94.4                       |
|                                                    | Levofloxacin                  | 2                        | >4                | 0.06->4    | 52.0                       |
| Meropenem non-susceptible (96)                     | Ceftazidime-avibactam         | 8                        | 32                | 0.5->128   | 50.0                       |
|                                                    | Ceftazidime                   | 32                       | 64                | 1->128     | 39.6                       |
|                                                    | Cefepime                      | 16                       | >16               | 1->16      | 34.4                       |
|                                                    | Aztreonam                     | 16                       | 32                | 2->128     | 18.8                       |
|                                                    | Piperacillin-tazobactam       | 64                       | >128              | 2->128     | 27.1                       |
|                                                    | Doripenem                     | >4                       | >4                | 1->4       | 6.3                        |
|                                                    | Imipenem                      | >8                       | >8                | 2->8       | 3.1                        |
|                                                    | Meropenem                     | >8                       | >8                | 4->8       | 0                          |
|                                                    | Amikacin                      | >32                      | >32               | 1->32      | 35.4                       |
|                                                    | Colistin (n=69) <sup>d</sup>  | 2                        | 2                 | 0.5-4      | 97.1                       |
|                                                    | Levofloxacin                  | >4                       | >4                | 0.25->4    | 19.8                       |
| Meropenem non-susceptible, MBL-negative (48)       | Ceftazidime-avibactam         | 4                        | 8                 | 0.5-32     | 95.8                       |
|                                                    | Ceftazidime                   | 8                        | 64                | 1->128     | 79.2                       |
|                                                    | Cefepime                      | 8                        | >16               | 1->16      | 64.6                       |
|                                                    | Aztreonam                     | 32                       | 64                | 2->128     | 29.2                       |
|                                                    | Piperacillin-tazobactam       | 16                       | >128              | 2->128     | 54.2                       |

| Organism, phenotype (no. of isolates) <sup>a</sup> | Antimicrobial agent          | MIC (µg/ml) <sup>b</sup> |                   |         | % Susceptible <sup>c</sup> |
|----------------------------------------------------|------------------------------|--------------------------|-------------------|---------|----------------------------|
|                                                    |                              | MIC <sub>50</sub>        | MIC <sub>90</sub> | Range   |                            |
|                                                    | Doripenem                    | >4                       | >4                | 1->4    | 12.5                       |
|                                                    | Imipenem                     | >8                       | >8                | 2->8    | 6.3                        |
|                                                    | Meropenem                    | >8                       | >8                | 4->8    | 0                          |
|                                                    | Amikacin                     | 8                        | >32               | 1->32   | 68.8                       |
|                                                    | Colistin (n=35) <sup>d</sup> | 2                        | 2                 | 0.5-4   | 97.1                       |
|                                                    | Levofloxacin                 | >4                       | >4                | 0.25->4 | 35.4                       |
| Multidrug-resistant (75)                           | Ceftazidime-avibactam        | 16                       | 32                | 2->128  | 37.3                       |
|                                                    | Ceftazidime                  | 32                       | 64                | 4->128  | 25.3                       |
|                                                    | Cefepime                     | 16                       | >16               | 2->16   | 17.3                       |
|                                                    | Aztreonam                    | 16                       | 64                | 2->128  | 9.3                        |
|                                                    | Piperacillin-tazobactam      | 64                       | >128              | 4->128  | 13.3                       |
|                                                    | Doripenem                    | >4                       | >4                | 0.5->4  | 6.7                        |
|                                                    | Imipenem                     | >8                       | >8                | 1->8    | 6.7                        |
|                                                    | Meropenem                    | >8                       | >8                | 0.12->8 | 4.0                        |
|                                                    | Amikacin                     | >32                      | >32               | 2->32   | 20.0                       |
|                                                    | Colistin (n=53) <sup>d</sup> | 1                        | 2                 | 0.5-4   | 96.2                       |
|                                                    | Levofloxacin                 | >4                       | >4                | 0.25->4 | 8.0                        |
| Multidrug-resistant, MBL-negative (29)             | Ceftazidime-avibactam        | 4                        | 8                 | 2-32    | 93.1                       |
|                                                    | Ceftazidime                  | 8                        | >128              | 4->128  | 65.5                       |
|                                                    | Cefepime                     | >16                      | >16               | 2->16   | 37.9                       |
|                                                    | Aztreonam                    | 32                       | >128              | 8->128  | 10.3                       |
|                                                    | Piperacillin-tazobactam      | 128                      | >128              | 4->128  | 34.5                       |
|                                                    | Doripenem                    | >4                       | >4                | 0.5->4  | 17.2                       |
|                                                    | Imipenem                     | >8                       | >8                | 1->8    | 17.2                       |
|                                                    | Meropenem                    | >8                       | >8                | 0.12->8 | 10.3                       |
|                                                    | Amikacin                     | 16                       | >32               | 2->32   | 51.7                       |
|                                                    | Colistin (n=19) <sup>d</sup> | 1                        | 2                 | 1-4     | 94.7                       |
|                                                    | Levofloxacin                 | >4                       | >4                | 0.25->4 | 13.8                       |

410 <sup>a</sup> MBL-negative, no gene encoding a metallo-β-lactamase was detected by polymerase chain reaction assay.

411 <sup>b</sup> —, MIC<sub>50</sub> and MIC<sub>90</sub> were not calculated for n <10 isolates.

412 <sup>c</sup> % Susceptibility was determined according to CLSI 2016 breakpoints with the exception of ceftazidime-avibactam  
413 and tigecycline where US FDA breakpoints were applied and colistin where EUCAST breakpoints were applied.

414 <sup>d</sup> Values are for colistin tested without 0.002% polysorbate-80; isolates collected in 2014-2015 only.

415 <sup>e</sup> All isolates were MBL-negative.

416 <sup>f</sup> Excluded isolates of Proteae and *Serratia* spp., which are intrinsically resistant to colistin.

417 <sup>g</sup> No meropenem non-susceptible isolates were collected.

418 <sup>h</sup> *Enterobacter* spp. included *Enterobacter aerogenes* (n=50), *Enterobacter asburiae* (n=9), *Enterobacter cloacae*  
419 (n=75), and *Enterobacter kobei* (n=2).

420 <sup>i</sup> *Citrobacter* spp. included *Citrobacter braakii* (n=1), *Citrobacter freundii* (n=43), and *Citrobacter koseri* (n=22).

421 <sup>j</sup> No colistin-resistant isolates were collected.

422 <sup>k</sup> Proteae included *Morganella morganii* (n=39), *Proteus mirabilis* (n=75), *Proteus penneri* (n=2), *Proteus vulgaris*  
423 (n=15), *Providencia alcalifaciens* (n=2), *Providencia rettgeri* (n=2), and *Providencia stuartii* (n=8).

424 <sup>l</sup> Other *Enterobacteriaceae* included *Escherichia vulneris* (n=1), *Klebsiella variicola* (n=1), *Raoultella*  
425 *ornithinolytica* (n=1), *Serratia marcescens* (n=40), and *Serratia ureilytica* (n=1).



426 **Table S7B.** Venezuela - *In vitro* activities of ceftazidime-avibactam and comparator  
 427 antimicrobial agents tested against 416 isolates of  $\beta$ -lactamase-positive *Enterobacteriaceae*  
 428 (n=301) and *P. aeruginosa* (n=115) collected as part of the INFORM global surveillance  
 429 program in 2012–2015.  
 430

| Organism/Genotype (no. of isolates) <sup>a</sup> | Antimicrobial agent           | MIC ( $\mu\text{g/ml}$ ) <sup>b</sup> |                   |                 | % Susceptible <sup>c</sup> |
|--------------------------------------------------|-------------------------------|---------------------------------------|-------------------|-----------------|----------------------------|
|                                                  |                               | MIC <sub>50</sub>                     | MIC <sub>90</sub> | Range           |                            |
| <i>Enterobacteriaceae</i> (301)                  |                               |                                       |                   |                 |                            |
| OSBL-positive (7)                                | Ceftazidime-avibactam         | — <sup>b</sup>                        | —                 | 0.06–0.5        | 100                        |
|                                                  | Ceftazidime                   | —                                     | —                 | 0.12–64         | 42.9                       |
|                                                  | Cefepime                      | —                                     | —                 | ≤0.12–16        | 85.7                       |
|                                                  | Aztreonam                     | —                                     | —                 | 0.06–32         | 57.1                       |
|                                                  | Piperacillin-tazobactam       | —                                     | —                 | 0.5–>128        | 57.1                       |
|                                                  | Doripenem                     | —                                     | —                 | 0.03–0.5        | 100                        |
|                                                  | Imipenem                      | —                                     | —                 | 0.12–4          | 57.1                       |
|                                                  | Meropenem                     | —                                     | —                 | 0.03–0.12       | 100                        |
|                                                  | Amikacin                      | —                                     | —                 | 1–>32           | 85.7                       |
|                                                  | Colistin (n=5) <sup>d</sup>   | —                                     | —                 | 0.5–>4          | 80.0                       |
|                                                  | Tigecycline                   | —                                     | —                 | 0.5–4           | 85.7                       |
|                                                  | Levofloxacin                  | —                                     | —                 | 0.12–>4         | 57.1                       |
| Spectrum-undefined-positive (1) <sup>e</sup>     |                               |                                       |                   |                 |                            |
|                                                  | Ceftazidime-avibactam         | — <sup>b</sup>                        | —                 | 1               | 100                        |
|                                                  | Ceftazidime                   | —                                     | —                 | 16              | 0                          |
|                                                  | Cefepime                      | —                                     | —                 | 16              | 0                          |
|                                                  | Aztreonam                     | —                                     | —                 | 32              | 0                          |
|                                                  | Piperacillin-tazobactam       | —                                     | —                 | 4               | 100                        |
|                                                  | Doripenem                     | —                                     | —                 | 0.03            | 100                        |
|                                                  | Imipenem                      | —                                     | —                 | 0.25            | 100                        |
|                                                  | Meropenem                     | —                                     | —                 | 0.03            | 100                        |
|                                                  | Amikacin                      | —                                     | —                 | 0.5             | 100                        |
|                                                  | Colistin (n=0) <sup>d</sup>   | —                                     | —                 | ND <sup>d</sup> | ND                         |
|                                                  | Tigecycline                   | —                                     | —                 | 0.5             | 100                        |
|                                                  | Levofloxacin                  | —                                     | —                 | >4              | 0                          |
| ESBL-positive (231) <sup>f</sup>                 |                               |                                       |                   |                 |                            |
|                                                  | Ceftazidime-avibactam         | 0.25                                  | 0.5               | ≤0.015–8        | 100                        |
|                                                  | Ceftazidime                   | 32                                    | 128               | 0.25–>128       | 16.0                       |
|                                                  | Cefepime                      | >16                                   | >16               | 0.25–>16        | 11.7                       |
|                                                  | Aztreonam                     | 64                                    | 128               | 0.5–>128        | 6.5                        |
|                                                  | Piperacillin-tazobactam       | 16                                    | >128              | ≤0.25–>128      | 64.9                       |
|                                                  | Doripenem                     | 0.06                                  | 0.12              | 0.015–4         | 99.6                       |
|                                                  | Imipenem                      | 0.25                                  | 0.5               | 0.06–4          | 97.8                       |
|                                                  | Meropenem                     | 0.03                                  | 0.12              | 0.015–4         | 99.6                       |
|                                                  | Amikacin                      | 8                                     | >32               | ≤0.25–>32       | 84.0                       |
|                                                  | Colistin (n=130) <sup>d</sup> | 0.5                                   | 1                 | ≤0.12–>4        | 96.2                       |
|                                                  | Tigecycline                   | 0.5                                   | 1                 | 0.06–>8         | 96.5                       |
|                                                  | Levofloxacin                  | >4                                    | >4                | ≤0.03–>4        | 23.4                       |
| AmpC-positive (38) <sup>g</sup>                  |                               |                                       |                   |                 |                            |
|                                                  | Ceftazidime-avibactam         | 0.12                                  | 0.5               | 0.03–0.5        | 100                        |
|                                                  | Ceftazidime                   | 0.5                                   | 128               | 0.06–128        | 57.9                       |
|                                                  | Cefepime                      | ≤0.12                                 | 2                 | ≤0.12–>16       | 92.1                       |
|                                                  | Aztreonam                     | 0.25                                  | 32                | ≤0.015–64       | 68.4                       |
|                                                  | Piperacillin-tazobactam       | 4                                     | 64                | ≤0.25–>128      | 78.9                       |
|                                                  | Doripenem                     | 0.06                                  | 0.5               | ≤0.008–1        | 100                        |
|                                                  | Imipenem                      | 2                                     | 8                 | 0.12–>8         | 36.8                       |
|                                                  | Meropenem                     | 0.06                                  | 0.25              | 0.015–1         | 100                        |
|                                                  | Amikacin                      | 2                                     | 8                 | ≤0.25–32        | 97.4                       |
|                                                  | Colistin (n=22) <sup>d</sup>  | 0.5                                   | >4                | 0.25–>4         | 81.8                       |
|                                                  | Tigecycline                   | 0.5                                   | 2                 | 0.12–4          | 92.1                       |
|                                                  | Levofloxacin                  | 0.12                                  | >4                | ≤0.03–>4        | 71.1                       |
| ESBL-positive + AmpC-positive (6) <sup>h</sup>   |                               |                                       |                   |                 |                            |
|                                                  | Ceftazidime-avibactam         | — <sup>b</sup>                        | —                 | 0.25–2          | 100                        |

| Organism/Genotype (no. of isolates) <sup>a</sup>               | Antimicrobial agent          | MIC ( $\mu\text{g/ml}$ ) <sup>b</sup> |                   |                 | % Susceptible <sup>c</sup> |
|----------------------------------------------------------------|------------------------------|---------------------------------------|-------------------|-----------------|----------------------------|
|                                                                |                              | MIC <sub>50</sub>                     | MIC <sub>90</sub> | Range           |                            |
|                                                                | Ceftazidime                  | —                                     | —                 | 4->128          | 16.7                       |
|                                                                | Cefepime                     | —                                     | —                 | 2->16           | 16.7                       |
|                                                                | Aztreonam                    | —                                     | —                 | 4-128           | 16.7                       |
|                                                                | Piperacillin-tazobactam      | —                                     | —                 | 2->128          | 50.0                       |
|                                                                | Doripenem                    | —                                     | —                 | 0.06->4         | 66.7                       |
|                                                                | Imipenem                     | —                                     | —                 | 0.25->8         | 50.0                       |
|                                                                | Meropenem                    | —                                     | —                 | 0.06->8         | 66.7                       |
|                                                                | Amikacin                     | —                                     | —                 | 2->32           | 66.7                       |
|                                                                | Colistin (n=3) <sup>d</sup>  | —                                     | —                 | 0.5->4          | 66.7                       |
|                                                                | Tigecycline                  | —                                     | —                 | 0.25-2          | 100                        |
|                                                                | Levofloxacin                 | —                                     | —                 | 1->4            | 16.7                       |
| KPC-positive (16) <sup>i</sup>                                 | Ceftazidime-avibactam        | 0.5                                   | 1                 | 0.03-2          | 100                        |
|                                                                | Ceftazidime                  | 32                                    | >128              | 2->128          | 6.3                        |
|                                                                | Cefepime                     | 8                                     | >16               | 2->16           | 6.3                        |
|                                                                | Aztreonam                    | >128                                  | >128              | 32->128         | 0                          |
|                                                                | Piperacillin-tazobactam      | >128                                  | >128              | 128->128        | 0                          |
|                                                                | Doripenem                    | 4                                     | >4                | 2->4            | 0                          |
|                                                                | Imipenem                     | 8                                     | >8                | 4->8            | 0                          |
|                                                                | Meropenem                    | >8                                    | >8                | 2->8            | 0                          |
|                                                                | Amikacin                     | 2                                     | >32               | 0.5->32         | 56.3                       |
|                                                                | Colistin (n=12) <sup>d</sup> | 0.5                                   | 1                 | 0.25-2          | 100                        |
|                                                                | Tigecycline                  | 0.5                                   | 2                 | 0.5-2           | 100                        |
|                                                                | Levofloxacin                 | >4                                    | >4                | 0.06->4         | 37.5                       |
| MBL-positive (2) <sup>j</sup>                                  | Ceftazidime-avibactam        | — <sup>b</sup>                        | —                 | 64->128         | 0                          |
|                                                                | Ceftazidime                  | —                                     | —                 | >128->128       | 0                          |
|                                                                | Cefepime                     | —                                     | —                 | >16->16         | 0                          |
|                                                                | Aztreonam                    | —                                     | —                 | 64-128          | 0                          |
|                                                                | Piperacillin-tazobactam      | —                                     | —                 | >128->128       | 0                          |
|                                                                | Doripenem                    | —                                     | —                 | >4->4           | 0                          |
|                                                                | Imipenem                     | —                                     | —                 | >8->8           | 0                          |
|                                                                | Meropenem                    | —                                     | —                 | >8->8           | 0                          |
|                                                                | Amikacin                     | —                                     | —                 | 4-4             | 100                        |
|                                                                | Colistin (n=2) <sup>d</sup>  | —                                     | —                 | 0.25-1          | 100                        |
|                                                                | Tigecycline                  | —                                     | —                 | 0.5-2           | 100                        |
|                                                                | Levofloxacin                 | —                                     | —                 | 1->4            | 50.0                       |
| <i>P. aeruginosa</i> (115)<br>ESBL-positive (1) <sup>k,l</sup> | Ceftazidime-avibactam        | — <sup>b</sup>                        | —                 | 8               | 100                        |
|                                                                | Ceftazidime                  | —                                     | —                 | 8               | 100                        |
|                                                                | Cefepime                     | —                                     | —                 | >16             | 0                          |
|                                                                | Aztreonam                    | —                                     | —                 | 32              | 0                          |
|                                                                | Piperacillin-tazobactam      | —                                     | —                 | 128             | 0                          |
|                                                                | Doripenem                    | —                                     | —                 | >4              | 0                          |
|                                                                | Imipenem                     | —                                     | —                 | >8              | 0                          |
|                                                                | Meropenem                    | —                                     | —                 | >8              | 0                          |
|                                                                | Amikacin                     | —                                     | —                 | 16              | 100                        |
|                                                                | Colistin (n=0) <sup>d</sup>  | —                                     | —                 | ND <sup>d</sup> | ND                         |
|                                                                | Levofloxacin                 | —                                     | —                 | >4              | 0                          |
| MBL-positive (48) <sup>k,m</sup>                               | Ceftazidime-avibactam        | 32                                    | 64                | 8->128          | 4.2                        |
|                                                                | Ceftazidime                  | 32                                    | 64                | 16->128         | 0                          |
|                                                                | Cefepime                     | 16                                    | >16               | 8->16           | 4.2                        |
|                                                                | Aztreonam                    | 16                                    | 32                | 2->128          | 8.3                        |
|                                                                | Piperacillin-tazobactam      | 64                                    | >128              | 32->128         | 0                          |
|                                                                | Doripenem                    | >4                                    | >4                | 4->4            | 0                          |
|                                                                | Imipenem                     | >8                                    | >8                | 8->8            | 0                          |
|                                                                | Meropenem                    | >8                                    | >8                | 4->8            | 0                          |
|                                                                | Amikacin                     | >32                                   | >32               | 16->32          | 2.1                        |
|                                                                | Colistin (n=34) <sup>d</sup> | 1                                     | 2                 | 0.5-4           | 97.1                       |
|                                                                | Levofloxacin                 | >4                                    | >4                | 2->4            | 4.2                        |

| Organism/Genotype (no. of isolates) <sup>a</sup>   | Antimicrobial agent          | MIC (µg/ml) <sup>b</sup> |                   |         | % Susceptible <sup>c</sup> |
|----------------------------------------------------|------------------------------|--------------------------|-------------------|---------|----------------------------|
|                                                    |                              | MIC <sub>50</sub>        | MIC <sub>90</sub> | Range   |                            |
| No acquired β-lactamase detected (66) <sup>k</sup> |                              |                          |                   |         |                            |
|                                                    | Ceftazidime-avibactam        | 4                        | 8                 | 0.5–32  | 97.0                       |
|                                                    | Ceftazidime                  | 4                        | 32                | 1–>128  | 81.8                       |
|                                                    | Cefepime                     | 8                        | >16               | 1–>16   | 74.2                       |
|                                                    | Aztreonam                    | 16                       | 32                | 2–>128  | 47.0                       |
|                                                    | Piperacillin-tazobactam      | 16                       | >128              | 2–>128  | 63.6                       |
|                                                    | Doripenem                    | 4                        | >4                | 0.12–>4 | 36.4                       |
|                                                    | Imipenem                     | >8                       | >8                | 2–>8    | 6.1                        |
|                                                    | Meropenem                    | 8                        | >8                | 0.12–>8 | 28.8                       |
|                                                    | Amikacin                     | 4                        | >32               | 1–>32   | 77.3                       |
|                                                    | Colistin (n=44) <sup>d</sup> | 2                        | 2                 | 0.5–4   | 95.5                       |
|                                                    | Levofloxacin                 | 4                        | >4                | 0.25–>4 | 47.0                       |

- 431 <sup>a</sup> OSBL, original-spectrum β-lactamase (e.g. TEM-1, SHV-1, SHV-11); ESBL, extended-spectrum β-lactamase;  
432 MBL, metallo-β-lactamase.
- 433 <sup>b</sup> —, MIC<sub>50</sub> and MIC<sub>90</sub> were not calculated for n <10 isolates.
- 434 <sup>c</sup> % Susceptibility was determined according to CLSI 2016 breakpoints with the exception of ceftazidime-avibactam  
435 and tigecycline where US FDA breakpoints were applied and colistin where EUCAST breakpoints were applied.
- 436 <sup>d</sup> Values are for colistin tested without 0.002% polysorbate-80; isolates collected in 2014-2015 only. ND, not  
437 determined; MIC range and % susceptible were not determined for n=0 isolates.
- 438 <sup>e</sup> Spectrum undefined, SHV-type and/or TEM-type β-lactamases with undefined spectrum of activity; isolate  
439 carrying TEM-214.
- 440 <sup>f</sup> Included isolates carrying CTX-M-1; CTX-M-2; CTX-M-8; CTX-M-12; CTX-M-14; CTX-M-15; CTX-M-27;  
441 CTX-M-32; CTX-M-65; CTX-M-124; CTX-M-type; SHV-2; SHV-2A; SHV-12; SHV-28; PER-1;  
442 CTX-M-15 and CTX-M-14; CTX-M-1 and SHV-12; CTX-M-2 and SHV-12; CTX-M-15 and SHV-5; CTX-M-15  
443 and SHV-12; CTX-M-15 and SHV-31; SHV-2 and SHV-41; with or without a SHV-OSBL and/or TEM-OSBL.
- 444 <sup>g</sup> Included isolates carrying CMY-2; DHA-1; or the chromosomal AmpCs common to *Citrobacter* spp.,  
445 *Enterobacter* spp., and *M. morgani* with or without a TEM-OSBL.
- 446 <sup>h</sup> Included isolates co-carrying CMY-2 and CTX-M-15 or the chromosomal ESBL common to *K. oxytoca*; and  
447 isolates carrying the chromosomal AmpC common to *Enterobacter* spp. and CTX-M-12, or CTX-M-12 and SHV-5,  
448 with or without a TEM-OSBL.
- 449 <sup>i</sup> Isolates carrying KPC-2; KPC-3; KPC-2 and CTX-M-1; KPC-2 and CTX-M-12; KPC-2 and CTX-M-15; KPC-3  
450 and SHV-12; KPC-2 and CTX-M-1 and CTX-M-2; KPC-3 and CTX-M-12 and SHV-12; with or without a SHV-  
451 OSBL and/or TEM-OSBL.
- 452 <sup>j</sup> Included isolates carrying NDM-1 and the chromosomal AmpC common to *Providencia* spp., or NDM-1 and CTX-  
453 M-15 with or without a SHV-OSBL and/or TEM-OSBL.
- 454 <sup>k</sup> Assumed to carry the chromosomal AmpC common to *P. aeruginosa*.
- 455 <sup>l</sup> Isolate carrying PER-1.
- 456 <sup>m</sup> Included isolates carrying VIM-2 with or without a TEM-OSBL; VIM-50.

457 **Table S8.** *In vitro* activities of ceftazidime-avibactam and comparator antimicrobial agents tested  
 458 against 2,848 isolates of ceftazidime non-susceptible *Enterobacteriaceae* and *P. aeruginosa*  
 459 collected in the Latin America region as part of the INFORM global surveillance program in  
 460 2012-2015  
 461

| Organism, phenotype (no. of isolates) <sup>a</sup> | Antimicrobial agent                              | MIC (µg/ml) <sup>b</sup> |                   |             | % Susceptible <sup>c</sup> |
|----------------------------------------------------|--------------------------------------------------|--------------------------|-------------------|-------------|----------------------------|
|                                                    |                                                  | MIC <sub>50</sub>        | MIC <sub>90</sub> | Range       |                            |
| <i>Enterobacteriaceae</i> (2,310)                  | Ceftazidime-avibactam                            | 0.25                     | 2                 | ≤0.015->128 | 99.0                       |
|                                                    | Ceftazidime                                      | 64                       | >128              | 8->128      | 0                          |
|                                                    | Cefepime                                         | >16                      | >16               | ≤0.12->16   | 16.2                       |
|                                                    | Aztreonam                                        | 64                       | >128              | 0.06->128   | 4.3                        |
|                                                    | Piperacillin-tazobactam                          | 32                       | >128              | ≤0.25->128  | 48.8                       |
|                                                    | Doripenem                                        | 0.06                     | 4                 | ≤0.008->4   | 86.0                       |
|                                                    | Imipenem                                         | 0.25                     | 4                 | 0.06->8     | 83.9                       |
|                                                    | Meropenem                                        | 0.06                     | 4                 | ≤0.004->8   | 84.1                       |
|                                                    | Amikacin                                         | 4                        | 32                | ≤0.25->32   | 86.1                       |
|                                                    | Colistin (n=1,364) <sup>d</sup>                  | 0.5                      | 2                 | ≤0.12->4    | 91.0                       |
|                                                    | Tigecycline                                      | 0.5                      | 2                 | ≤0.015->8   | 95.2                       |
|                                                    | Levofloxacin                                     | >4                       | >4                | ≤0.03->4    | 33.4                       |
|                                                    | <i>Enterobacteriaceae</i> , MBL-negative (2,294) | Ceftazidime-avibactam    | 0.25              | 2           | ≤0.015->128                |
| Ceftazidime                                        |                                                  | 64                       | >128              | 8->128      | 0                          |
| Cefepime                                           |                                                  | >16                      | >16               | ≤0.12->16   | 16.3                       |
| Aztreonam                                          |                                                  | 64                       | >128              | 0.06->128   | 4.0                        |
| Piperacillin-tazobactam                            |                                                  | 32                       | >128              | ≤0.25->128  | 49.1                       |
| Doripenem                                          |                                                  | 0.06                     | 4                 | ≤0.008->4   | 86.6                       |
| Imipenem                                           |                                                  | 0.25                     | 4                 | 0.06->8     | 84.4                       |
| Meropenem                                          |                                                  | 0.06                     | 4                 | ≤0.004->8   | 84.7                       |
| Amikacin                                           |                                                  | 4                        | 32                | ≤0.25->32   | 86.3                       |
| Colistin (n=1,348) <sup>d</sup>                    |                                                  | 0.5                      | 2                 | ≤0.12->4    | 91.3                       |
| Tigecycline                                        |                                                  | 0.5                      | 2                 | ≤0.015->8   | 95.3                       |
| Levofloxacin                                       |                                                  | >4                       | >4                | ≤0.03->4    | 33.2                       |
| <i>Escherichia coli</i> (786)                      |                                                  | Ceftazidime-avibactam    | 0.25              | 0.5         | ≤0.015-32                  |
|                                                    | Ceftazidime                                      | 32                       | 128               | 8->128      | 0                          |
|                                                    | Cefepime                                         | >16                      | >16               | ≤0.12->16   | 8.9                        |
|                                                    | Aztreonam                                        | 64                       | 128               | 0.12->128   | 2.5                        |
|                                                    | Piperacillin-tazobactam                          | 8                        | 128               | 0.5->128    | 74.8                       |
|                                                    | Doripenem                                        | 0.03                     | 0.06              | ≤0.008->4   | 98.4                       |
|                                                    | Imipenem                                         | 0.25                     | 0.5               | 0.06->8     | 97.7                       |
|                                                    | Meropenem                                        | 0.03                     | 0.06              | ≤0.004->8   | 97.8                       |
|                                                    | Amikacin                                         | 8                        | 16                | 0.5->32     | 92.1                       |
|                                                    | Colistin (n=440) <sup>d</sup>                    | 0.5                      | 1                 | ≤0.12->4    | 99.6                       |
|                                                    | Tigecycline                                      | 0.25                     | 0.5               | 0.06-4      | 99.6                       |
|                                                    | Levofloxacin                                     | >4                       | >4                | ≤0.03->4    | 9.7                        |
|                                                    | <i>Escherichia coli</i> , MBL-negative (784)     | Ceftazidime-avibactam    | 0.25              | 0.5         | ≤0.015-8                   |
| Ceftazidime                                        |                                                  | 32                       | 128               | 8->128      | 0                          |
| Cefepime                                           |                                                  | >16                      | >16               | ≤0.12->16   | 8.9                        |
| Aztreonam                                          |                                                  | 64                       | 128               | 0.12->128   | 2.6                        |
| Piperacillin-tazobactam                            |                                                  | 8                        | 128               | 0.5->128    | 75.0                       |
| Doripenem                                          |                                                  | 0.03                     | 0.06              | ≤0.008->4   | 98.6                       |
| Imipenem                                           |                                                  | 0.25                     | 0.25              | 0.06->8     | 98.0                       |
| Meropenem                                          |                                                  | 0.03                     | 0.06              | ≤0.004->8   | 98.1                       |
| Amikacin                                           |                                                  | 8                        | 16                | 0.5->32     | 92.2                       |
| Colistin (n=438) <sup>d</sup>                      |                                                  | 0.5                      | 1                 | 0.12->4     | 99.5                       |
| Tigecycline                                        |                                                  | 0.25                     | 0.5               | 0.06-4      | 99.6                       |

|                                              |                                                   |                       |      |             |             |
|----------------------------------------------|---------------------------------------------------|-----------------------|------|-------------|-------------|
|                                              | Levofloxacin                                      | >4                    | >4   | ≤0.03->4    | 9.7         |
| <i>Klebsiella pneumoniae</i> (1,003)         | Ceftazidime-avibactam                             | 0.5                   | 2    | ≤0.015->128 | 99.0        |
|                                              | Ceftazidime                                       | 64                    | >128 | 8->128      | 0           |
|                                              | Cefepime                                          | >16                   | >16  | ≤0.12->16   | 6.9         |
|                                              | Aztreonam                                         | 128                   | >128 | 0.25->128   | 1.6         |
|                                              | Piperacillin-tazobactam                           | 128                   | >128 | 0.5->128    | 31.3        |
|                                              | Doripenem                                         | 0.12                  | >4   | 0.015->4    | 72.7        |
|                                              | Imipenem                                          | 0.25                  | >8   | 0.06->8     | 76.2        |
|                                              | Meropenem                                         | 0.06                  | >8   | 0.015->8    | 68.7        |
|                                              | Amikacin                                          | 4                     | >32  | ≤0.25->32   | 82.0        |
|                                              | Colistin (n=628) <sup>d</sup>                     | 1                     | 4    | 0.25->4     | 89.3        |
|                                              | Tigecycline                                       | 1                     | 2    | 0.06->8     | 94.1        |
|                                              | Levofloxacin                                      | >4                    | >4   | ≤0.03->4    | 35.5        |
|                                              | <i>Klebsiella pneumoniae</i> , MBL-negative (994) | Ceftazidime-avibactam | 0.5  | 2           | ≤0.015->128 |
| Ceftazidime                                  |                                                   | 64                    | >128 | 8->128      | 0           |
| Cefepime                                     |                                                   | >16                   | >16  | ≤0.12->16   | 6.9         |
| Aztreonam                                    |                                                   | 128                   | >128 | 0.25->128   | 1.3         |
| Piperacillin-tazobactam                      |                                                   | 128                   | >128 | 0.5->128    | 31.6        |
| Doripenem                                    |                                                   | 0.12                  | >4   | 0.015->4    | 73.3        |
| Imipenem                                     |                                                   | 0.25                  | >8   | 0.06->8     | 76.9        |
| Meropenem                                    |                                                   | 0.06                  | >8   | 0.015->8    | 69.3        |
| Amikacin                                     |                                                   | 4                     | >32  | ≤0.25->32   | 82.2        |
| Colistin (n=619) <sup>d</sup>                |                                                   | 1                     | 4    | 0.25->4     | 89.8        |
| Tigecycline                                  |                                                   | 1                     | 2    | 0.06->8     | 94.3        |
| Levofloxacin                                 |                                                   | >4                    | >4   | ≤0.03->4    | 35.3        |
| <i>Klebsiella oxytoca</i> (41) <sup>e</sup>  |                                                   | Ceftazidime-avibactam | 0.25 | 1           | 0.03-16     |
|                                              | Ceftazidime                                       | 64                    | >128 | 8->128      | 0.0         |
|                                              | Cefepime                                          | 8                     | >16  | ≤0.12->16   | 24.4        |
|                                              | Aztreonam                                         | 128                   | >128 | 16->128     | 0           |
|                                              | Piperacillin-tazobactam                           | 32                    | >128 | 2->128      | 43.9        |
|                                              | Doripenem                                         | 0.06                  | 2    | 0.03->4     | 87.8        |
|                                              | Imipenem                                          | 0.25                  | 4    | 0.06->8     | 80.5        |
|                                              | Meropenem                                         | 0.06                  | 4    | 0.03->8     | 87.8        |
|                                              | Amikacin                                          | 8                     | 32   | 0.5->32     | 85.4        |
|                                              | Colistin (n=27) <sup>d</sup>                      | 0.5                   | 1    | 0.25-2      | 100         |
|                                              | Tigecycline                                       | 0.5                   | 1    | 0.06-2      | 100         |
|                                              | Levofloxacin                                      | 1                     | >4   | 0.06->4     | 70.7        |
|                                              | <i>Enterobacter</i> spp. (285) <sup>f</sup>       | Ceftazidime-avibactam | 0.5  | 2           | 0.03-128    |
| Ceftazidime                                  |                                                   | 64                    | >128 | 8->128      | 0           |
| Cefepime                                     |                                                   | 4                     | >16  | ≤0.12->16   | 40.7        |
| Aztreonam                                    |                                                   | 64                    | >128 | 0.06->128   | 3.9         |
| Piperacillin-tazobactam                      |                                                   | 64                    | >128 | 1->128      | 30.5        |
| Doripenem                                    |                                                   | 0.12                  | 0.5  | 0.015->4    | 92.6        |
| Imipenem                                     |                                                   | 0.5                   | 2    | 0.06->8     | 88.1        |
| Meropenem                                    |                                                   | 0.12                  | 0.5  | 0.015->8    | 92.6        |
| Amikacin                                     |                                                   | 2                     | 32   | ≤0.25->32   | 89.1        |
| Colistin (n=155) <sup>d</sup>                |                                                   | 0.5                   | 1    | 0.25->4     | 97.4        |
| Tigecycline                                  |                                                   | 1                     | 2    | 0.12-8      | 94.4        |
| Levofloxacin                                 |                                                   | 0.5                   | >4   | ≤0.03->4    | 67.0        |
| <i>Enterobacter</i> spp., MBL-negative (282) |                                                   | Ceftazidime-avibactam | 0.5  | 2           | 0.03-32     |
|                                              | Ceftazidime                                       | 64                    | >128 | 8->128      | 0           |
|                                              | Cefepime                                          | 4                     | >16  | ≤0.12->16   | 40.8        |
|                                              | Aztreonam                                         | 64                    | >128 | 0.06->128   | 2.8         |
|                                              | Piperacillin-tazobactam                           | 64                    | >128 | 1->128      | 30.9        |
|                                              | Doripenem                                         | 0.12                  | 0.5  | 0.015->4    | 93.6        |
|                                              | Imipenem                                          | 0.5                   | 2    | 0.06->8     | 89.0        |
|                                              | Meropenem                                         | 0.12                  | 0.5  | 0.015->8    | 93.6        |
|                                              | Amikacin                                          | 2                     | 32   | ≤0.25->32   | 89.4        |
|                                              | Colistin (n=152) <sup>d</sup>                     | 0.5                   | 1    | 0.25->4     | 97.4        |
|                                              | Tigecycline                                       | 1                     | 2    | 0.12-8      | 94.3        |
|                                              | Levofloxacin                                      | 0.5                   | >4   | ≤0.03->4    | 66.7        |

|                                                     |                                            |                       |      |            |           |
|-----------------------------------------------------|--------------------------------------------|-----------------------|------|------------|-----------|
| <i>Citrobacter</i> spp. (100) <sup>g</sup>          | Ceftazidime-avibactam                      | 0.25                  | 0.5  | 0.03–128   | 98.0      |
|                                                     | Ceftazidime                                | 64                    | >128 | 8–>128     | 0         |
|                                                     | Cefepime                                   | 2                     | >16  | ≤0.12–>16  | 57.0      |
|                                                     | Aztreonam                                  | 32                    | 128  | 0.06–>128  | 6.0       |
|                                                     | Piperacillin-tazobactam                    | 32                    | >128 | 2–>128     | 44.0      |
|                                                     | Doripenem                                  | 0.06                  | 0.25 | 0.03–>4    | 95.0      |
|                                                     | Imipenem                                   | 0.5                   | 2    | 0.12–>8    | 85.0      |
|                                                     | Meropenem                                  | 0.06                  | 0.12 | 0.015–>8   | 94.0      |
|                                                     | Amikacin                                   | 2                     | >32  | 0.5–>32    | 84.0      |
|                                                     | Colistin (n=52) <sup>d</sup>               | 0.5                   | 1    | 0.25–2     | 100       |
|                                                     | Tigecycline                                | 0.5                   | 2    | 0.06–4     | 98.0      |
|                                                     | Levofloxacin                               | 0.5                   | >4   | ≤0.03–>4   | 68.0      |
|                                                     | <i>Citrobacter</i> spp., MBL-negative (99) | Ceftazidime-avibactam | 0.25 | 0.5        | 0.03–128  |
| Ceftazidime                                         |                                            | 64                    | >128 | 8–>128     | 0         |
| Cefepime                                            |                                            | 2                     | >16  | ≤0.12–>16  | 57.6      |
| Aztreonam                                           |                                            | 32                    | >128 | 0.06–>128  | 6.1       |
| Piperacillin-tazobactam                             |                                            | 32                    | >128 | 2–>128     | 44.4      |
| Doripenem                                           |                                            | 0.06                  | 0.25 | 0.03–>4    | 96.0      |
| Imipenem                                            |                                            | 0.5                   | 2    | 0.12–>8    | 85.9      |
| Meropenem                                           |                                            | 0.06                  | 0.12 | 0.015–>8   | 95.0      |
| Amikacin                                            |                                            | 2                     | >32  | 0.5–>32    | 83.8      |
| Colistin (n=51) <sup>d</sup>                        |                                            | 0.5                   | 1    | 0.25–2     | 100       |
| Tigecycline                                         |                                            | 0.5                   | 2    | 0.06–4     | 98.0      |
| Levofloxacin                                        |                                            | 0.5                   | >4   | ≤0.03–>4   | 68.7      |
| Proteaceae (60) <sup>h</sup>                        |                                            | Ceftazidime-avibactam | 0.06 | 0.5        | 0.03–64   |
|                                                     | Ceftazidime                                | 16                    | 64   | 8–>128     | 0         |
|                                                     | Cefepime                                   | 0.5                   | >16  | ≤0.12–>16  | 75.0      |
|                                                     | Aztreonam                                  | 2                     | 16   | 0.06–>128  | 76.7      |
|                                                     | Piperacillin-tazobactam                    | 1                     | 8    | ≤0.25–>128 | 93.3      |
|                                                     | Doripenem                                  | 0.25                  | 0.5  | 0.06–>4    | 98.3      |
|                                                     | Imipenem                                   | 2                     | 4    | 0.25–>8    | 10.0      |
|                                                     | Meropenem                                  | 0.12                  | 0.25 | 0.06–8     | 98.3      |
|                                                     | Amikacin                                   | 4                     | 32   | 0.5–>32    | 76.7      |
|                                                     | Colistin (n=38) <sup>d</sup>               | >4                    | >4   | 1–>4       | 2.6       |
|                                                     | Tigecycline                                | 2                     | 4    | ≤0.015–>8  | 53.3      |
|                                                     | Levofloxacin                               | 4                     | >4   | ≤0.03–>4   | 46.7      |
|                                                     | Proteaceae, MBL-negative (59)              | Ceftazidime-avibactam | 0.06 | 0.5        | 0.03–8    |
| Ceftazidime                                         |                                            | 16                    | 64   | 8–>128     | 0         |
| Cefepime                                            |                                            | 0.5                   | >16  | ≤0.12–>16  | 76.3      |
| Aztreonam                                           |                                            | 2                     | 16   | 0.12–>128  | 76.3      |
| Piperacillin-tazobactam                             |                                            | 1                     | 8    | ≤0.25–>128 | 94.9      |
| Doripenem                                           |                                            | 0.25                  | 0.5  | 0.06–1     | 100       |
| Imipenem                                            |                                            | 2                     | 4    | 0.25–4     | 10.2      |
| Meropenem                                           |                                            | 0.12                  | 0.25 | 0.06–0.25  | 100       |
| Amikacin                                            |                                            | 4                     | >32  | 0.5–>32    | 76.3      |
| Colistin (n=38) <sup>d</sup>                        |                                            | >4                    | >4   | 1–>4       | 2.6       |
| Tigecycline                                         |                                            | 2                     | 4    | ≤0.015–>8  | 54.2      |
| Levofloxacin                                        |                                            | 4                     | >4   | ≤0.03–>4   | 45.8      |
| Other <i>Enterobacteriaceae</i> (35) <sup>e,i</sup> |                                            | Ceftazidime-avibactam | 0.5  | 1          | 0.25–>128 |
|                                                     | Ceftazidime                                | 32                    | >128 | 8–>128     | 0         |
|                                                     | Cefepime                                   | 16                    | >16  | ≤0.12–>16  | 20.0      |
|                                                     | Aztreonam                                  | 64                    | >128 | 16–>128    | 0         |
|                                                     | Piperacillin-tazobactam                    | 16                    | >128 | 0.5–>128   | 57.1      |
|                                                     | Doripenem                                  | 0.12                  | >4   | 0.06–>4    | 88.6      |
|                                                     | Imipenem                                   | 1                     | >8   | 0.12–>8    | 85.7      |
|                                                     | Meropenem                                  | 0.12                  | >8   | 0.06–>8    | 88.6      |
|                                                     | Amikacin                                   | 8                     | >32  | 2–>32      | 68.6      |
|                                                     | Colistin (n=24) <sup>d</sup>               | >4                    | >4   | 0.25–>4    | 45.8      |
|                                                     | Tigecycline                                | 1                     | 2    | 0.25–8     | 91.4      |
|                                                     | Levofloxacin                               | 2                     | >4   | 0.12–>4    | 65.7      |

|                                                    |                               |      |      |           |      |
|----------------------------------------------------|-------------------------------|------|------|-----------|------|
| <i>Pseudomonas aeruginosa</i> (538)                | Ceftazidime-avibactam         | 8    | 64   | 0.12->128 | 58.0 |
|                                                    | Ceftazidime                   | 64   | >128 | 16->128   | 0    |
|                                                    | Cefepime                      | 16   | >16  | 0.25->16  | 19.0 |
|                                                    | Aztreonam                     | 32   | >128 | 2->128    | 9.3  |
|                                                    | Piperacillin-tazobactam       | 128  | >128 | 4->128    | 6.0  |
|                                                    | Doripenem                     | >4   | >4   | 0.03->4   | 27.0 |
|                                                    | Imipenem                      | >8   | >8   | 0.25->8   | 23.8 |
|                                                    | Meropenem                     | >8   | >8   | ≤0.06->8  | 26.6 |
|                                                    | Amikacin                      | 16   | >32  | 0.5->32   | 54.1 |
|                                                    | Colistin (n=401) <sup>d</sup> | 2    | 2    | 0.5-8     | 95.0 |
|                                                    | Levofloxacin                  | >4   | >4   | 0.06->4   | 30.5 |
| <i>Pseudomonas aeruginosa</i> , MBL-negative (431) | Ceftazidime-avibactam         | 8    | 32   | 0.12->128 | 71.7 |
|                                                    | Ceftazidime                   | 64   | >128 | 16->128   | 0    |
|                                                    | Cefepime                      | 16   | >16  | 0.25->16  | 21.8 |
|                                                    | Aztreonam                     | 32   | >128 | 4->128    | 6.5  |
|                                                    | Piperacillin-tazobactam       | >128 | >128 | 4->128    | 6.0  |
|                                                    | Doripenem                     | >4   | >4   | 0.03->4   | 33.0 |
|                                                    | Imipenem                      | >8   | >8   | 0.25->8   | 29.7 |
|                                                    | Meropenem                     | 8    | >8   | ≤0.06->8  | 32.3 |
|                                                    | Amikacin                      | 8    | >32  | 0.5->32   | 64.5 |
|                                                    | Colistin (n=316) <sup>d</sup> | 2    | 2    | 0.5-8     | 94.9 |
|                                                    | Levofloxacin                  | >4   | >4   | 0.06->4   | 35.0 |

462 <sup>a</sup> MBL-negative, no gene encoding a metallo-β-lactamase was detected by polymerase chain reaction assay.

463 <sup>b</sup> —, MIC<sub>50</sub> and MIC<sub>90</sub> were not calculated for n <10 isolates.

464 <sup>c</sup> % Susceptibility was determined according to CLSI 2016 breakpoints with the exception of ceftazidime-avibactam  
465 and tigecycline where US FDA breakpoints were applied and colistin where EUCAST breakpoints were applied.

466 <sup>d</sup> Values are for colistin tested without 0.002% polysorbate-80; isolates collected in 2014-2015 only.

467 <sup>e</sup> All isolates were MBL-negative.

468 <sup>f</sup> *Enterobacter* spp. included *Enterobacter aerogenes* (n=66), *Enterobacter asburiae* (n=5), *Enterobacter cloacae*  
469 (n=209), *Enterobacter kobei* (n=4), and *Enterobacter ludwigii* (n=1).

470 <sup>g</sup> *Citrobacter* spp. included *Citrobacter amalonaticus* (n=1), *Citrobacter braakii* (n=8), *Citrobacter freundii* (n=87),  
471 and *Citrobacter koseri* (n=4).

472 <sup>h</sup> Proteaceae included *Morganella morganii* (n=34), *Proteus mirabilis* (n=16), *Proteus vulgaris* (n=2), *Providencia*  
473 *rettgeri* (n=2), and *Providencia stuartii* (n=6).

474 <sup>i</sup> Other *Enterobacteriaceae* included *Raoultella ornithinolytica* (n=9) and *Serratia marcescens* (n=26).

475 **Table S9.** *In vitro* activities of ceftazidime-avibactam and comparator antimicrobial agents tested  
 476 against 1,032 isolates of meropenem non-susceptible *Enterobacteriaceae* and *P. aeruginosa*  
 477 collected in the Latin America region as part of the INFORM global surveillance program in  
 478 2012-2015  
 479

| Organism, phenotype (no. of isolates) <sup>a</sup> | Antimicrobial agent                            | MIC (µg/ml) <sup>b</sup> |                   |           | % Susceptible <sup>c</sup> |
|----------------------------------------------------|------------------------------------------------|--------------------------|-------------------|-----------|----------------------------|
|                                                    |                                                | MIC <sub>50</sub>        | MIC <sub>90</sub> | Range     |                            |
| <i>Enterobacteriaceae</i> (389)                    | Ceftazidime-avibactam                          | 1                        | 4                 | 0.03->128 | 95.4                       |
|                                                    | Ceftazidime                                    | 64                       | >128              | 0.12->128 | 5.4                        |
|                                                    | Cefepime                                       | >16                      | >16               | ≤0.12->16 | 7.2                        |
|                                                    | Aztreonam                                      | >128                     | >128              | 0.06->128 | 4.1                        |
|                                                    | Piperacillin-tazobactam                        | >128                     | >128              | 1->128    | 2.1                        |
|                                                    | Doripenem                                      | 4                        | >4                | 0.12->4   | 13.9                       |
|                                                    | Imipenem                                       | 8                        | >8                | 0.06->8   | 22.4                       |
|                                                    | Meropenem                                      | 8                        | >8                | 2->8      | 0                          |
|                                                    | Amikacin                                       | 8                        | >32               | 0.5->32   | 68.1                       |
|                                                    | Colistin (n=256) <sup>d</sup>                  | 1                        | >4                | 0.25->4   | 75.4                       |
|                                                    | Tigecycline                                    | 1                        | 2                 | 0.06-8    | 94.3                       |
|                                                    | Levofloxacin                                   | >4                       | >4                | ≤0.03->4  | 19.8                       |
|                                                    | <i>Enterobacteriaceae</i> , MBL-negative (373) | Ceftazidime-avibactam    | 1                 | 4         | 0.03->128                  |
| Ceftazidime                                        |                                                | 64                       | >128              | 0.12->128 | 5.6                        |
| Cefepime                                           |                                                | >16                      | >16               | ≤0.12->16 | 7.2                        |
| Aztreonam                                          |                                                | >128                     | >128              | 0.06->128 | 2.4                        |
| Piperacillin-tazobactam                            |                                                | >128                     | >128              | 1->128    | 2.1                        |
| Doripenem                                          |                                                | 4                        | >4                | 0.12->4   | 14.5                       |
| Imipenem                                           |                                                | 8                        | >8                | 0.06->8   | 23.3                       |
| Meropenem                                          |                                                | 8                        | >8                | 2->8      | 0                          |
| Amikacin                                           |                                                | 8                        | >32               | 0.5->32   | 68.4                       |
| Colistin (n=240) <sup>d</sup>                      |                                                | 1                        | >4                | 0.25->4   | 75.8                       |
| Tigecycline                                        |                                                | 1                        | 2                 | 0.06-8    | 94.9                       |
| Levofloxacin                                       |                                                | >4                       | >4                | ≤0.03->4  | 18.2                       |
| <i>Escherichia coli</i> (17)                       |                                                | Ceftazidime-avibactam    | 0.25              | 32        | 0.03-32                    |
|                                                    | Ceftazidime                                    | 32                       | >128              | 8->128    | 0                          |
|                                                    | Cefepime                                       | >16                      | >16               | 4->16     | 0                          |
|                                                    | Aztreonam                                      | 128                      | >128              | 64->128   | 0                          |
|                                                    | Piperacillin-tazobactam                        | >128                     | >128              | 128->128  | 0                          |
|                                                    | Doripenem                                      | 2                        | >4                | 1->4      | 23.5                       |
|                                                    | Imipenem                                       | 4                        | 8                 | 0.25->8   | 23.5                       |
|                                                    | Meropenem                                      | 4                        | >8                | 2->8      | 0                          |
|                                                    | Amikacin                                       | 16                       | >32               | 4->32     | 70.6                       |
|                                                    | Colistin (n=10) <sup>d</sup>                   | 0.5                      | 1                 | 0.25-1    | 100                        |
|                                                    | Tigecycline                                    | 0.25                     | 0.5               | 0.12-0.5  | 100                        |
|                                                    | Levofloxacin                                   | >4                       | >4                | 0.06->4   | 17.7                       |
|                                                    | <i>Escherichia coli</i> , MBL-negative (15)    | Ceftazidime-avibactam    | 0.25              | 2         | 0.03-4                     |
| Ceftazidime                                        |                                                | 16                       | >128              | 8->128    | 0                          |
| Cefepime                                           |                                                | >16                      | >16               | 4->16     | 0                          |
| Aztreonam                                          |                                                | >128                     | >128              | 64->128   | 0                          |
| Piperacillin-tazobactam                            |                                                | >128                     | >128              | 128->128  | 0                          |
| Doripenem                                          |                                                | 2                        | >4                | 1->4      | 26.7                       |
| Imipenem                                           |                                                | 4                        | 8                 | 0.25->8   | 26.7                       |
| Meropenem                                          |                                                | 4                        | >8                | 2->8      | 0                          |
| Amikacin                                           |                                                | 8                        | >32               | 4->32     | 73.3                       |
| Colistin (n=8) <sup>d</sup>                        |                                                | 0.5                      | 1                 | 0.25-1    | 100                        |
| Tigecycline                                        |                                                | 0.25                     | 0.5               | 0.12-0.5  | 100                        |
| Levofloxacin                                       |                                                | >4                       | >4                | 0.06->4   | 20.0                       |



|                                             |                                                   |                       |                |           |           |
|---------------------------------------------|---------------------------------------------------|-----------------------|----------------|-----------|-----------|
| <i>Klebsiella pneumoniae</i> (326)          | Ceftazidime-avibactam                             | 1                     | 4              | 0.03->128 | 96.9      |
|                                             | Ceftazidime                                       | 64                    | >128           | 0.5->128  | 3.7       |
|                                             | Cefepime                                          | >16                   | >16            | ≤0.12->16 | 5.2       |
|                                             | Aztreonam                                         | >128                  | >128           | 0.25->128 | 2.5       |
|                                             | Piperacillin-tazobactam                           | >128                  | >128           | 2->128    | 1.2       |
|                                             | Doripenem                                         | 4                     | >4             | 0.5->4    | 13.2      |
|                                             | Imipenem                                          | 8                     | >8             | 0.06->8   | 25.5      |
|                                             | Meropenem                                         | 8                     | >8             | 2->8      | 0         |
|                                             | Amikacin                                          | 8                     | >32            | 0.5->32   | 65.6      |
|                                             | Colistin (n=211) <sup>d</sup>                     | 1                     | >4             | 0.25->4   | 73.0      |
|                                             | Tigecycline                                       | 1                     | 2              | 0.06-8    | 94.2      |
|                                             | Levofloxacin                                      | >4                    | >4             | ≤0.03->4  | 13.2      |
|                                             | <i>Klebsiella pneumoniae</i> , MBL-negative (317) | Ceftazidime-avibactam | 1              | 4         | 0.03->128 |
| Ceftazidime                                 |                                                   | 64                    | >128           | 0.5->128  | 3.8       |
| Cefepime                                    |                                                   | >16                   | >16            | ≤0.12->16 | 5.4       |
| Aztreonam                                   |                                                   | >128                  | >128           | 0.25->128 | 1.6       |
| Piperacillin-tazobactam                     |                                                   | >128                  | >128           | 2->128    | 1.3       |
| Doripenem                                   |                                                   | 4                     | >4             | 0.5->4    | 13.6      |
| Imipenem                                    |                                                   | 8                     | >8             | 0.06->8   | 26.2      |
| Meropenem                                   |                                                   | 8                     | >8             | 2->8      | 0         |
| Amikacin                                    |                                                   | 8                     | >32            | 0.5->32   | 65.9      |
| Colistin (n=202) <sup>d</sup>               |                                                   | 1                     | >4             | 0.25->4   | 73.8      |
| Tigecycline                                 |                                                   | 1                     | 2              | 0.06-8    | 94.6      |
| Levofloxacin                                |                                                   | >4                    | >4             | ≤0.03->4  | 12.0      |
| <i>Klebsiella oxytoca</i> (8) <sup>e</sup>  |                                                   | Ceftazidime-avibactam | — <sup>b</sup> | —         | 0.06-16   |
|                                             | Ceftazidime                                       | —                     | —              | 2->128    | 37.5      |
|                                             | Cefepime                                          | —                     | —              | 1->16     | 25.0      |
|                                             | Aztreonam                                         | —                     | —              | 16->128   | 0         |
|                                             | Piperacillin-tazobactam                           | —                     | —              | 128->128  | 0         |
|                                             | Doripenem                                         | —                     | —              | 1->4      | 25.0      |
|                                             | Imipenem                                          | —                     | —              | 4->8      | 0         |
|                                             | Meropenem                                         | —                     | —              | 2->8      | 0         |
|                                             | Amikacin                                          | —                     | —              | 1-32      | 87.5      |
|                                             | Colistin (n=7) <sup>d</sup>                       | —                     | —              | 0.25-1    | 100       |
|                                             | Tigecycline                                       | —                     | —              | 0.25-2    | 100       |
|                                             | Levofloxacin                                      | —                     | —              | 0.06->4   | 87.5      |
|                                             | <i>Enterobacter</i> spp. (23) <sup>f</sup>        | Ceftazidime-avibactam | 1              | 16        | 0.06-128  |
| Ceftazidime                                 |                                                   | 64                    | >128           | 0.12->128 | 8.7       |
| Cefepime                                    |                                                   | 16                    | >16            | ≤0.12->16 | 26.1      |
| Aztreonam                                   |                                                   | 64                    | >128           | 0.06->128 | 21.7      |
| Piperacillin-tazobactam                     |                                                   | 128                   | >128           | 1->128    | 13.0      |
| Doripenem                                   |                                                   | 4                     | >4             | 0.12->4   | 8.7       |
| Imipenem                                    |                                                   | 8                     | >8             | 2->8      | 0         |
| Meropenem                                   |                                                   | 4                     | >8             | 2->8      | 0         |
| Amikacin                                    |                                                   | 4                     | 16             | 1-32      | 91.3      |
| Colistin (n=16) <sup>d</sup>                |                                                   | 1                     | 1              | 0.5->4    | 93.8      |
| Tigecycline                                 |                                                   | 0.5                   | 2              | 0.25-4    | 95.7      |
| Levofloxacin                                |                                                   | 1                     | >4             | 0.06->4   | 65.2      |
| <i>Enterobacter</i> spp., MBL-negative (20) |                                                   | Ceftazidime-avibactam | 1              | 2         | 0.06-4    |
|                                             | Ceftazidime                                       | 64                    | >128           | 0.12->128 | 10.0      |
|                                             | Cefepime                                          | 16                    | >16            | ≤0.12->16 | 25.0      |
|                                             | Aztreonam                                         | 64                    | >128           | 0.06->128 | 10.0      |
|                                             | Piperacillin-tazobactam                           | 128                   | >128           | 1->128    | 15.0      |
|                                             | Doripenem                                         | 4                     | >4             | 0.12->4   | 10.0      |
|                                             | Imipenem                                          | 8                     | >8             | 2->8      | 0         |
|                                             | Meropenem                                         | 8                     | >8             | 2->8      | 0         |
|                                             | Amikacin                                          | 4                     | 8              | 1-32      | 95.0      |
|                                             | Colistin (n=13) <sup>d</sup>                      | 1                     | 1              | 0.5->4    | 92.3      |
|                                             | Tigecycline                                       | 1                     | 2              | 0.25-4    | 95.0      |
|                                             | Levofloxacin                                      | 1                     | >4             | 0.06->4   | 60.0      |

|                                                    |                                           |                       |                |          |        |
|----------------------------------------------------|-------------------------------------------|-----------------------|----------------|----------|--------|
| <i>Citrobacter</i> spp. (8) <sup>g</sup>           | Ceftazidime-avibactam                     | — <sup>b</sup>        | —              | 0.06–64  | 87.5   |
|                                                    | Ceftazidime                               | —                     | —              | 4->128   | 25.0   |
|                                                    | Cefepime                                  | —                     | —              | 1->16    | 25.0   |
|                                                    | Aztreonam                                 | —                     | —              | 16->128  | 0      |
|                                                    | Piperacillin-tazobactam                   | —                     | —              | 64->128  | 0      |
|                                                    | Doripenem                                 | —                     | —              | 1->4     | 37.5   |
|                                                    | Imipenem                                  | —                     | —              | 2->8     | 0      |
|                                                    | Meropenem                                 | —                     | —              | 2->8     | 0      |
|                                                    | Amikacin                                  | —                     | —              | 1->32    | 75.0   |
|                                                    | Colistin (n=6) <sup>d</sup>               | —                     | —              | 0.25–1   | 100    |
|                                                    | Tigecycline                               | —                     | —              | 0.25–2   | 100    |
|                                                    | Levofloxacin                              | —                     | —              | ≤0.03->4 | 37.5   |
|                                                    | <i>Citrobacter</i> spp., MBL-negative (7) | Ceftazidime-avibactam | — <sup>b</sup> | —        | 0.06–1 |
| Ceftazidime                                        |                                           | —                     | —              | 4->128   | 28.6   |
| Cefepime                                           |                                           | —                     | —              | 1->16    | 28.6   |
| Aztreonam                                          |                                           | —                     | —              | 16->128  | 0      |
| Piperacillin-tazobactam                            |                                           | —                     | —              | 64->128  | 0      |
| Doripenem                                          |                                           | —                     | —              | 1->4     | 42.9   |
| Imipenem                                           |                                           | —                     | —              | 2->8     | 0      |
| Meropenem                                          |                                           | —                     | —              | 2->8     | 0      |
| Amikacin                                           |                                           | —                     | —              | 1->32    | 71.4   |
| Colistin (n=5) <sup>d</sup>                        |                                           | —                     | —              | 0.25–1   | 100    |
| Tigecycline                                        |                                           | —                     | —              | 0.25–2   | 100    |
| Levofloxacin                                       |                                           | —                     | —              | ≤0.03->4 | 42.9   |
| Proteaceae (2) <sup>h</sup>                        |                                           | Ceftazidime-avibactam | — <sup>b</sup> | —        | 0.5–64 |
|                                                    | Ceftazidime                               | —                     | —              | 4–64     | 50.0   |
|                                                    | Cefepime                                  | —                     | —              | 16->16   | 0      |
|                                                    | Aztreonam                                 | —                     | —              | 0.06–4   | 100    |
|                                                    | Piperacillin-tazobactam                   | —                     | —              | 4->128   | 50.0   |
|                                                    | Doripenem                                 | —                     | —              | 2->4     | 0      |
|                                                    | Imipenem                                  | —                     | —              | 4->8     | 0      |
|                                                    | Meropenem                                 | —                     | —              | 2–8      | 0      |
|                                                    | Amikacin                                  | —                     | —              | 2–2      | 100    |
|                                                    | Colistin (n=2) <sup>d</sup>               | —                     | —              | >4->4    | 0      |
|                                                    | Tigecycline                               | —                     | —              | 2–4      | 50.0   |
|                                                    | Levofloxacin                              | —                     | —              | 2->4     | 50.0   |
|                                                    | Proteaceae, MBL-negative (1)              | Ceftazidime-avibactam | — <sup>b</sup> | —        | 0.5    |
| Ceftazidime                                        |                                           | —                     | —              | 4        | 100    |
| Cefepime                                           |                                           | —                     | —              | >16      | 0      |
| Aztreonam                                          |                                           | —                     | —              | 4        | 100    |
| Piperacillin-tazobactam                            |                                           | —                     | —              | 4        | 100    |
| Doripenem                                          |                                           | —                     | —              | 2        | 0      |
| Imipenem                                           |                                           | —                     | —              | 4        | 0      |
| Meropenem                                          |                                           | —                     | —              | 2        | 0      |
| Amikacin                                           |                                           | —                     | —              | 2        | 100    |
| Colistin (n=1) <sup>d</sup>                        |                                           | —                     | —              | >4       | 0      |
| Tigecycline                                        |                                           | —                     | —              | 2        | 100    |
| Levofloxacin                                       |                                           | —                     | —              | >4       | 0      |
| Other <i>Enterobacteriaceae</i> (5) <sup>e,i</sup> |                                           | Ceftazidime-avibactam | — <sup>b</sup> | —        | 0.5–1  |
|                                                    | Ceftazidime                               | —                     | —              | 2->128   | 20.0   |
|                                                    | Cefepime                                  | —                     | —              | 1->16    | 20.0   |
|                                                    | Aztreonam                                 | —                     | —              | 4->128   | 20.0   |
|                                                    | Piperacillin-tazobactam                   | —                     | —              | 64->128  | 0      |
|                                                    | Doripenem                                 | —                     | —              | 2->4     | 0      |
|                                                    | Imipenem                                  | —                     | —              | >8->8    | 0      |
|                                                    | Meropenem                                 | —                     | —              | 2->8     | 0      |
|                                                    | Amikacin                                  | —                     | —              | 2->32    | 60.0   |
|                                                    | Colistin (n=4) <sup>d</sup>               | —                     | —              | 2->4     | 25.0   |
|                                                    | Tigecycline                               | —                     | —              | 0.5–4    | 80.0   |
|                                                    | Levofloxacin                              | —                     | —              | 0.12–2   | 100    |

|                                     |                                                    |                       |      |          |          |
|-------------------------------------|----------------------------------------------------|-----------------------|------|----------|----------|
| <i>Pseudomonas aeruginosa</i> (643) | Ceftazidime-avibactam                              | 8                     | 64   | 0.5->128 | 67.5     |
|                                     | Ceftazidime                                        | 32                    | >128 | 1->128   | 38.6     |
|                                     | Cefepime                                           | 16                    | >16  | 0.25->16 | 38.6     |
|                                     | Aztreonam                                          | 32                    | >128 | 1->128   | 19.6     |
|                                     | Piperacillin-tazobactam                            | 64                    | >128 | 2->128   | 27.5     |
|                                     | Doripenem                                          | >4                    | >4   | 0.5->4   | 6.8      |
|                                     | Imipenem                                           | >8                    | >8   | 1->8     | 5.9      |
|                                     | Meropenem                                          | >8                    | >8   | 4->8     | 0        |
|                                     | Amikacin                                           | 16                    | >32  | 0.5->32  | 56.6     |
|                                     | Colistin (n=486) <sup>d</sup>                      | 2                     | 2    | 0.25-8   | 95.1     |
|                                     | Levofloxacin                                       | >4                    | >4   | 0.25->4  | 29.7     |
|                                     | <i>Pseudomonas aeruginosa</i> , MBL-negative (537) | Ceftazidime-avibactam | 4    | 32       | 0.5->128 |
| Ceftazidime                         |                                                    | 16                    | >128 | 1->128   | 45.6     |
| Cefepime                            |                                                    | 16                    | >16  | 0.25->16 | 44.3     |
| Aztreonam                           |                                                    | 32                    | >128 | 1->128   | 19.2     |
| Piperacillin-tazobactam             |                                                    | 64                    | >128 | 2->128   | 31.5     |
| Doripenem                           |                                                    | >4                    | >4   | 0.5->4   | 8.2      |
| Imipenem                            |                                                    | >8                    | >8   | 1->8     | 7.1      |
| Meropenem                           |                                                    | >8                    | >8   | 4->8     | 0        |
| Amikacin                            |                                                    | 8                     | >32  | 0.5->32  | 65.0     |
| Colistin (n=399) <sup>d</sup>       |                                                    | 2                     | 2    | 0.25-8   | 95.0     |
| Levofloxacin                        |                                                    | >4                    | >4   | 0.25->4  | 33.0     |

480 <sup>a</sup> MBL-negative, no gene encoding a metallo- $\beta$ -lactamase was detected by polymerase chain reaction assay.

481 <sup>b</sup> —, MIC<sub>50</sub> and MIC<sub>90</sub> were not calculated for n <10 isolates.

482 <sup>c</sup> % Susceptibility was determined according to CLSI 2016 breakpoints with the exception of ceftazidime-avibactam  
483 and tigecycline where US FDA breakpoints were applied and colistin where EUCAST breakpoints were applied.

484 <sup>d</sup> Values are for colistin tested without 0.002% polysorbate-80; isolates collected in 2014-2015 only.

485 <sup>e</sup> All isolates were MBL-negative.

486 <sup>f</sup> *Enterobacter* spp. included *Enterobacter aerogenes* (n=7), *Enterobacter asburiae* (n=1), and *Enterobacter cloacae*  
487 (n=15).

488 <sup>g</sup> *Citrobacter* spp. included *Citrobacter freundii* (n=7) and *Citrobacter koseri* (n=1).

489 <sup>h</sup> Proteaceae included *Providencia rettgeri* (n=1) and *Providencia stuartii* (n=1).

490 <sup>i</sup> Other *Enterobacteriaceae* included *Raoultella ornithinolytica* (n=1) and *Serratia marcescens* (n=4).

491 **Table S10.** *In vitro* activities of ceftazidime-avibactam and comparator antimicrobial agents  
 492 tested against 126 isolates of colistin-resistant *Enterobacteriaceae* and *P. aeruginosa* collected in  
 493 the Latin America region as part of the INFORM global surveillance program in 2012-2015  
 494

| Organism, phenotype (no. of isolates) <sup>a</sup> | Antimicrobial agent                            | MIC (µg/ml) <sup>b</sup> |                   |             | % Susceptible <sup>c</sup> |
|----------------------------------------------------|------------------------------------------------|--------------------------|-------------------|-------------|----------------------------|
|                                                    |                                                | MIC <sub>50</sub>        | MIC <sub>90</sub> | Range       |                            |
| <i>Enterobacteriaceae</i> (124) <sup>d</sup>       | Ceftazidime-avibactam                          | 0.5                      | 2                 | 0.03->128   | 96.0                       |
|                                                    | Ceftazidime                                    | 32                       | >128              | 0.12->128   | 41.1                       |
|                                                    | Cefepime                                       | 16                       | >16               | ≤0.12->16   | 43.6                       |
|                                                    | Aztreonam                                      | 64                       | >128              | 0.03->128   | 43.6                       |
|                                                    | Piperacillin-tazobactam                        | 32                       | >128              | 0.5->128    | 46.8                       |
|                                                    | Doripenem                                      | 0.25                     | >4                | ≤0.008->4   | 56.5                       |
|                                                    | Imipenem                                       | 1                        | >8                | 0.12->8     | 61.3                       |
|                                                    | Meropenem                                      | 0.12                     | >8                | 0.03->8     | 53.2                       |
|                                                    | Amikacin                                       | 4                        | >32               | 0.5->32     | 68.6                       |
|                                                    | Colistin (n=124) <sup>e</sup>                  | >4                       | >4                | 4->4        | 0                          |
|                                                    | Tigecycline                                    | 1                        | 2                 | 0.12-4      | 93.6                       |
|                                                    | Levofloxacin                                   | >4                       | >4                | ≤0.03->4    | 37.9                       |
|                                                    | <i>Enterobacteriaceae</i> , MBL-negative (120) | Ceftazidime-avibactam    | 0.5               | 2           | 0.03->128                  |
| Ceftazidime                                        |                                                | 32                       | >128              | 0.12->128   | 42.5                       |
| Cefepime                                           |                                                | 16                       | >16               | ≤0.12->16   | 45.0                       |
| Aztreonam                                          |                                                | 64                       | >128              | 0.03->128   | 42.5                       |
| Piperacillin-tazobactam                            |                                                | 32                       | >128              | 0.5->128    | 48.3                       |
| Doripenem                                          |                                                | 0.12                     | >4                | ≤0.008->4   | 58.3                       |
| Imipenem                                           |                                                | 1                        | >8                | 0.12->8     | 63.3                       |
| Meropenem                                          |                                                | 0.12                     | >8                | 0.03->8     | 55.0                       |
| Amikacin                                           |                                                | 4                        | >32               | 0.5->32     | 70.8                       |
| Colistin (n=120) <sup>e</sup>                      |                                                | >4                       | >4                | 4->4        | 0                          |
| Tigecycline                                        |                                                | 1                        | 2                 | 0.12-4      | 94.2                       |
| Levofloxacin                                       |                                                | >4                       | >4                | ≤0.03->4    | 37.5                       |
| <i>Escherichia coli</i> (12) <sup>f</sup>          |                                                | Ceftazidime-avibactam    | — <sup>b</sup>    | —           | 0.12-0.25                  |
|                                                    | Ceftazidime                                    | —                        | —                 | 0.12-32     | 75.0                       |
|                                                    | Cefepime                                       | —                        | —                 | ≤0.12->16   | 75.0                       |
|                                                    | Aztreonam                                      | —                        | —                 | 0.06-32     | 75.0                       |
|                                                    | Piperacillin-tazobactam                        | —                        | —                 | 2-32        | 87.5                       |
|                                                    | Doripenem                                      | —                        | —                 | ≤0.008-0.06 | 100                        |
|                                                    | Imipenem                                       | —                        | —                 | 0.12-0.25   | 100                        |
|                                                    | Meropenem                                      | —                        | —                 | 0.03-0.06   | 100                        |
|                                                    | Amikacin                                       | —                        | —                 | 2-8         | 100                        |
|                                                    | Colistin (n=8) <sup>e</sup>                    | —                        | —                 | 4->4        | 0                          |
|                                                    | Tigecycline                                    | —                        | —                 | 0.12-0.5    | 100                        |
|                                                    | Levofloxacin                                   | —                        | —                 | ≤0.03->4    | 37.5                       |
|                                                    | <i>Klebsiella pneumoniae</i> (82)              | Ceftazidime-avibactam    | 1                 | 4           | 0.03->128                  |
| Ceftazidime                                        |                                                | 64                       | >128              | 0.12->128   | 18.3                       |
| Cefepime                                           |                                                | >16                      | >16               | ≤0.12->16   | 18.3                       |
| Aztreonam                                          |                                                | 128                      | >128              | 0.06->128   | 20.7                       |
| Piperacillin-tazobactam                            |                                                | >128                     | >128              | 2->128      | 22.0                       |
| Doripenem                                          |                                                | 4                        | >4                | 0.03->4     | 35.4                       |
| Imipenem                                           |                                                | 1                        | >8                | 0.12->8     | 50.0                       |
| Meropenem                                          |                                                | 4                        | >8                | 0.03->8     | 30.5                       |
| Amikacin                                           |                                                | 16                       | >32               | 0.5->32     | 52.4                       |
| Colistin (n=82) <sup>e</sup>                       |                                                | >4                       | >4                | 4->4        | 0                          |
| Tigecycline                                        |                                                | 1                        | 2                 | 0.25-4      | 90.2                       |
| Levofloxacin                                       |                                                | >4                       | >4                | 0.06->4     | 12.2                       |
| <i>Klebsiella pneumoniae</i> , MBL-negative (78)   |                                                | Ceftazidime-avibactam    | 1                 | 2           | 0.03->128                  |
|                                                    | Ceftazidime                                    | 64                       | >128              | 0.12->128   | 19.2                       |

|                                                |                                              |                       |      |            |        |     |
|------------------------------------------------|----------------------------------------------|-----------------------|------|------------|--------|-----|
|                                                | Cefepime                                     | >16                   | >16  | ≤0.12->16  | 19.2   |     |
|                                                | Aztreonam                                    | 128                   | >128 | 0.06->128  | 18.0   |     |
|                                                | Piperacillin-tazobactam                      | >128                  | >128 | 2->128     | 23.1   |     |
|                                                | Doripenem                                    | 2                     | >4   | 0.03->4    | 37.2   |     |
|                                                | Imipenem                                     | 1                     | >8   | 0.12->8    | 52.6   |     |
|                                                | Meropenem                                    | 4                     | >8   | 0.03->8    | 32.1   |     |
|                                                | Amikacin                                     | 16                    | >32  | 0.5->32    | 55.1   |     |
|                                                | Colistin (n=78) <sup>e</sup>                 | >4                    | >4   | 4->4       | 0      |     |
|                                                | Tigecycline                                  | 1                     | 2    | 0.25-4     | 91.0   |     |
|                                                | Levofloxacin                                 | >4                    | >4   | 0.06->4    | 10.3   |     |
| <hr/>                                          |                                              |                       |      |            |        |     |
| <i>Klebsiella oxytoca</i> (2) <sup>f</sup>     | Ceftazidime-avibactam                        | — <sup>b</sup>        | —    | 0.12-0.12  | 100    |     |
|                                                | Ceftazidime                                  | —                     | —    | 0.25-0.25  | 100    |     |
|                                                | Cefepime                                     | —                     | —    | ≤0.12-0.25 | 100    |     |
|                                                | Aztreonam                                    | —                     | —    | 0.12-0.25  | 100    |     |
|                                                | Piperacillin-tazobactam                      | —                     | —    | 2-4        | 100    |     |
|                                                | Doripenem                                    | —                     | —    | 0.06-0.06  | 100    |     |
|                                                | Imipenem                                     | —                     | —    | 0.25-0.25  | 100    |     |
|                                                | Meropenem                                    | —                     | —    | 0.03-0.06  | 100    |     |
|                                                | Amikacin                                     | —                     | —    | 2-2        | 100    |     |
|                                                | Colistin (n=2) <sup>e</sup>                  | —                     | —    | 4-4        | 0      |     |
|                                                | Tigecycline                                  | —                     | —    | 0.5-0.5    | 100    |     |
|                                                | Levofloxacin                                 | —                     | —    | 0.06-2     | 100    |     |
|                                                | <hr/>                                        |                       |      |            |        |     |
|                                                | <i>Enterobacter</i> spp. (32) <sup>f,g</sup> | Ceftazidime-avibactam | 0.12 | 0.5        | 0.06-1 | 100 |
| Ceftazidime                                    |                                              | 0.25                  | 8    | 0.12-128   | 87.5   |     |
| Cefepime                                       |                                              | ≤0.12                 | 0.25 | ≤0.12->16  | 96.9   |     |
| Aztreonam                                      |                                              | 0.12                  | 2    | 0.03-64    | 90.6   |     |
| Piperacillin-tazobactam                        |                                              | 4                     | 16   | 0.5-128    | 96.9   |     |
| Doripenem                                      |                                              | 0.06                  | 0.12 | 0.03->4    | 96.9   |     |
| Imipenem                                       |                                              | 1                     | 2    | 0.5->8     | 78.1   |     |
| Meropenem                                      |                                              | 0.06                  | 0.12 | 0.03->8    | 96.9   |     |
| Amikacin                                       |                                              | 2                     | 4    | 1-4        | 100    |     |
| Colistin (n=32) <sup>e</sup>                   |                                              | >4                    | >4   | 4->4       | 0      |     |
| Tigecycline                                    |                                              | 0.5                   | 1    | 0.25-1     | 100    |     |
| Levofloxacin                                   |                                              | 0.06                  | 0.12 | ≤0.03-2    | 100    |     |
| <hr/>                                          |                                              |                       |      |            |        |     |
| <i>Pseudomonas aeruginosa</i> (2) <sup>f</sup> | Ceftazidime-avibactam                        | — <sup>b</sup>        | —    | 2-4        | 100    |     |
|                                                | Ceftazidime                                  | —                     | —    | 2-16       | 50.0   |     |
|                                                | Cefepime                                     | —                     | —    | 2->16      | 50.0   |     |
|                                                | Aztreonam                                    | —                     | —    | 8-16       | 50.0   |     |
|                                                | Piperacillin-tazobactam                      | —                     | —    | 4->128     | 50.0   |     |
|                                                | Doripenem                                    | —                     | —    | 0.5-2      | 100    |     |
|                                                | Imipenem                                     | —                     | —    | 1-2        | 100    |     |
|                                                | Meropenem                                    | —                     | —    | 0.25-8     | 50.0   |     |
|                                                | Amikacin                                     | —                     | —    | 4->32      | 50.0   |     |
|                                                | Colistin (n=2) <sup>e</sup>                  | —                     | —    | 8-8        | 0      |     |
|                                                | Levofloxacin                                 | —                     | —    | 0.5->4     | 50.0   |     |

495 <sup>a</sup> MBL-negative, no gene encoding a metallo-β-lactamase was detected by polymerase chain reaction assay.

496 <sup>b</sup> —, MIC<sub>50</sub> and MIC<sub>90</sub> were not calculated for n <10 isolates.

497 <sup>c</sup> % Susceptibility was determined according to CLSI 2016 breakpoints with the exception of ceftazidime-avibactam  
498 and tigecycline where US FDA breakpoints were applied and colistin where EUCAST breakpoints were applied.

499 <sup>d</sup> Excludes isolates of Proteaceae and *Serratia* spp., which are intrinsically resistant to colistin.

500 <sup>e</sup> Values are for colistin tested without 0.002% polysorbate-80; isolates collected in 2014-2015 only.

501 <sup>f</sup> All isolates were MBL-negative.

502 <sup>g</sup> *Enterobacter* spp. included *Enterobacter asburiae* (n=15) and *Enterobacter cloacae* (n=17).

503 **Table S11.** *In vitro* activities of ceftazidime-avibactam and comparator antimicrobial agents  
 504 tested against 2,050 isolates of multidrug-resistant *Enterobacteriaceae* and *P. aeruginosa*  
 505 collected in the Latin America region as part of the INFORM global surveillance program in  
 506 2012-2015  
 507

| Organism, genotype (no. of isolates) <sup>a</sup> | Antimicrobial agent                              | MIC (µg/ml) <sup>b</sup> |                   |             | % Susceptible <sup>c</sup> |
|---------------------------------------------------|--------------------------------------------------|--------------------------|-------------------|-------------|----------------------------|
|                                                   |                                                  | MIC <sub>50</sub>        | MIC <sub>90</sub> | Range       |                            |
| <i>Enterobacteriaceae</i> (1,596)                 | Ceftazidime-avibactam                            | 0.5                      | 2                 | ≤0.015->128 | 98.8                       |
|                                                   | Ceftazidime                                      | 64                       | >128              | 0.12->128   | 6.9                        |
|                                                   | Cefepime                                         | >16                      | >16               | ≤0.12->16   | 2.6                        |
|                                                   | Aztreonam                                        | 64                       | >128              | ≤0.015->128 | 2.8                        |
|                                                   | Piperacillin-tazobactam                          | 64                       | >128              | ≤0.25->128  | 41.7                       |
|                                                   | Doripenem                                        | 0.06                     | >4                | 0.015->4    | 79.7                       |
|                                                   | Imipenem                                         | 0.25                     | 8                 | 0.06->8     | 78.1                       |
|                                                   | Meropenem                                        | 0.06                     | >8                | 0.015->8    | 77.1                       |
|                                                   | Amikacin                                         | 8                        | >32               | ≤0.25->32   | 80.6                       |
|                                                   | Colistin (n=947) <sup>d</sup>                    | 1                        | >4                | ≤0.12->4    | 85.7                       |
|                                                   | Tigecycline                                      | 0.5                      | 2                 | ≤0.015->8   | 92.9                       |
|                                                   | Levofloxacin                                     | >4                       | >4                | ≤0.03->4    | 9.0                        |
|                                                   | <i>Enterobacteriaceae</i> , MBL-negative (1,582) | Ceftazidime-avibactam    | 0.25              | 2           | ≤0.015->128                |
| Ceftazidime                                       |                                                  | 64                       | >128              | 0.12->128   | 7.0                        |
| Cefepime                                          |                                                  | >16                      | >16               | ≤0.12->16   | 2.7                        |
| Aztreonam                                         |                                                  | 64                       | >128              | ≤0.015->128 | 2.5                        |
| Piperacillin-tazobactam                           |                                                  | 32                       | >128              | ≤0.25->128  | 42.0                       |
| Doripenem                                         |                                                  | 0.06                     | >4                | 0.015->4    | 80.4                       |
| Imipenem                                          |                                                  | 0.25                     | 8                 | 0.06->8     | 78.8                       |
| Meropenem                                         |                                                  | 0.06                     | >8                | 0.015->8    | 77.8                       |
| Amikacin                                          |                                                  | 8                        | >32               | ≤0.25->32   | 80.8                       |
| Colistin (n=933) <sup>d</sup>                     |                                                  | 0.5                      | >4                | ≤0.12->4    | 86.1                       |
| Tigecycline                                       |                                                  | 0.5                      | 2                 | ≤0.015->8   | 93.1                       |
| Levofloxacin                                      |                                                  | >4                       | >4                | ≤0.03->4    | 8.7                        |
| <i>Escherichia coli</i> (676)                     |                                                  | Ceftazidime-avibactam    | 0.25              | 0.5         | ≤0.015-32                  |
|                                                   | Ceftazidime                                      | 32                       | 128               | 0.12->128   | 4.4                        |
|                                                   | Cefepime                                         | >16                      | >16               | 0.5->16     | 0.3                        |
|                                                   | Aztreonam                                        | 64                       | 128               | 0.12->128   | 0.6                        |
|                                                   | Piperacillin-tazobactam                          | 16                       | 128               | 0.5->128    | 72.9                       |
|                                                   | Doripenem                                        | 0.03                     | 0.06              | 0.015->4    | 98.1                       |
|                                                   | Imipenem                                         | 0.25                     | 0.25              | 0.06->8     | 97.8                       |
|                                                   | Meropenem                                        | 0.03                     | 0.06              | 0.015->8    | 97.5                       |
|                                                   | Amikacin                                         | 8                        | 16                | 0.5->32     | 90.8                       |
|                                                   | Colistin (n=379) <sup>d</sup>                    | 0.5                      | 1                 | ≤0.12->4    | 99.5                       |
|                                                   | Tigecycline                                      | 0.25                     | 0.5               | ≤0.015-4    | 99.7                       |
|                                                   | Levofloxacin                                     | >4                       | >4                | ≤0.03->4    | 1.8                        |
|                                                   | <i>Escherichia coli</i> , MBL-negative (674)     | Ceftazidime-avibactam    | 0.25              | 0.5         | ≤0.015-8                   |
| Ceftazidime                                       |                                                  | 32                       | 128               | 0.12->128   | 4.5                        |
| Cefepime                                          |                                                  | >16                      | >16               | 0.5->16     | 0.3                        |
| Aztreonam                                         |                                                  | 64                       | 128               | 0.12->128   | 0.6                        |
| Piperacillin-tazobactam                           |                                                  | 16                       | 128               | 0.5->128    | 73.2                       |
| Doripenem                                         |                                                  | 0.03                     | 0.06              | 0.015->4    | 98.4                       |
| Imipenem                                          |                                                  | 0.25                     | 0.25              | 0.06->8     | 98.1                       |
| Meropenem                                         |                                                  | 0.03                     | 0.06              | 0.015->8    | 97.8                       |
| Amikacin                                          |                                                  | 8                        | 16                | 0.5->32     | 91.0                       |
| Colistin (n=377) <sup>d</sup>                     |                                                  | 0.5                      | 1                 | 0.12->4     | 99.5                       |
| Tigecycline                                       |                                                  | 0.25                     | 0.5               | ≤0.015-4    | 99.7                       |
| Levofloxacin                                      |                                                  | >4                       | >4                | ≤0.03->4    | 1.8                        |

|                                              |                                                   |                       |      |             |             |
|----------------------------------------------|---------------------------------------------------|-----------------------|------|-------------|-------------|
| <i>Klebsiella pneumoniae</i> (674)           | Ceftazidime-avibactam                             | 0.5                   | 2    | ≤0.015->128 | 98.5        |
|                                              | Ceftazidime                                       | 64                    | >128 | 0.5->128    | 2.1         |
|                                              | Cefepime                                          | >16                   | >16  | ≤0.12->16   | 3.1         |
|                                              | Aztreonam                                         | 128                   | >128 | 0.12->128   | 1.5         |
|                                              | Piperacillin-tazobactam                           | >128                  | >128 | 1->128      | 11.3        |
|                                              | Doripenem                                         | 0.5                   | >4   | 0.015->4    | 59.1        |
|                                              | Imipenem                                          | 0.5                   | >8   | 0.06->8     | 64.8        |
|                                              | Meropenem                                         | 0.5                   | >8   | 0.015->8    | 53.6        |
|                                              | Amikacin                                          | 4                     | >32  | ≤0.25->32   | 73.6        |
|                                              | Colistin (n=420) <sup>d</sup>                     | 1                     | >4   | 0.25->4     | 82.6        |
|                                              | Tigecycline                                       | 1                     | 2    | 0.06->8     | 92.0        |
|                                              | Levofloxacin                                      | >4                    | >4   | 0.06->4     | 10.1        |
|                                              | <i>Klebsiella pneumoniae</i> , MBL-negative (665) | Ceftazidime-avibactam | 0.5  | 2           | ≤0.015->128 |
| Ceftazidime                                  |                                                   | 64                    | >128 | 0.5->128    | 2.1         |
| Cefepime                                     |                                                   | >16                   | >16  | ≤0.12->16   | 3.2         |
| Aztreonam                                    |                                                   | 128                   | >128 | 0.12->128   | 1.1         |
| Piperacillin-tazobactam                      |                                                   | >128                  | >128 | 1->128      | 11.4        |
| Doripenem                                    |                                                   | 0.25                  | >4   | 0.015->4    | 59.9        |
| Imipenem                                     |                                                   | 0.5                   | >8   | 0.06->8     | 65.7        |
| Meropenem                                    |                                                   | 0.5                   | >8   | 0.015->8    | 54.3        |
| Amikacin                                     |                                                   | 4                     | >32  | ≤0.25->32   | 73.8        |
| Colistin (n=411) <sup>d</sup>                |                                                   | 1                     | >4   | 0.25->4     | 83.2        |
| Tigecycline                                  |                                                   | 1                     | 2    | 0.06->8     | 92.2        |
| Levofloxacin                                 |                                                   | >4                    | >4   | 0.06->4     | 9.5         |
| <i>Klebsiella oxytoca</i> (20) <sup>e</sup>  |                                                   | Ceftazidime-avibactam | 0.5  | 1           | 0.03-16     |
|                                              | Ceftazidime                                       | 32                    | >128 | 1->128      | 25.0        |
|                                              | Cefepime                                          | 16                    | >16  | 1->16       | 20.0        |
|                                              | Aztreonam                                         | 128                   | >128 | 16->128     | 0           |
|                                              | Piperacillin-tazobactam                           | >128                  | >128 | 8->128      | 5.0         |
|                                              | Doripenem                                         | 0.12                  | >4   | 0.03->4     | 75.0        |
|                                              | Imipenem                                          | 0.5                   | 8    | 0.12->8     | 65.0        |
|                                              | Meropenem                                         | 0.06                  | >8   | 0.03->8     | 70.0        |
|                                              | Amikacin                                          | 8                     | 32   | 1->32       | 80.0        |
|                                              | Colistin (n=14) <sup>d</sup>                      | 0.5                   | 1    | 0.25-2      | 100         |
|                                              | Tigecycline                                       | 1                     | 2    | 0.25-2      | 100         |
|                                              | Levofloxacin                                      | 2                     | >4   | 0.06->4     | 50.0        |
|                                              | <i>Enterobacter</i> spp. (106) <sup>f</sup>       | Ceftazidime-avibactam | 1    | 4           | 0.06-128    |
| Ceftazidime                                  |                                                   | 128                   | >128 | 2->128      | 1.9         |
| Cefepime                                     |                                                   | >16                   | >16  | ≤0.12->16   | 4.7         |
| Aztreonam                                    |                                                   | 128                   | >128 | 0.12->128   | 0.9         |
| Piperacillin-tazobactam                      |                                                   | >128                  | >128 | 4->128      | 16.0        |
| Doripenem                                    |                                                   | 0.25                  | 4    | 0.03->4     | 84.0        |
| Imipenem                                     |                                                   | 0.5                   | 8    | 0.06->8     | 81.1        |
| Meropenem                                    |                                                   | 0.12                  | 4    | 0.015->8    | 84.9        |
| Amikacin                                     |                                                   | 4                     | 32   | 0.5->32     | 76.4        |
| Colistin (n=55) <sup>d</sup>                 |                                                   | 0.5                   | 1    | 0.25->4     | 96.4        |
| Tigecycline                                  |                                                   | 1                     | 4    | 0.25-8      | 88.7        |
| Levofloxacin                                 |                                                   | >4                    | >4   | 0.06->4     | 24.5        |
| <i>Enterobacter</i> spp., MBL-negative (105) |                                                   | Ceftazidime-avibactam | 1    | 4           | 0.06-32     |
|                                              | Ceftazidime                                       | 128                   | >128 | 2->128      | 1.9         |
|                                              | Cefepime                                          | >16                   | >16  | ≤0.12->16   | 4.8         |
|                                              | Aztreonam                                         | 128                   | >128 | 16->128     | 0           |
|                                              | Piperacillin-tazobactam                           | >128                  | >128 | 4->128      | 16.2        |
|                                              | Doripenem                                         | 0.25                  | 4    | 0.03->4     | 84.8        |
|                                              | Imipenem                                          | 0.5                   | 8    | 0.06->8     | 81.9        |
|                                              | Meropenem                                         | 0.12                  | 4    | 0.015->8    | 85.7        |
|                                              | Amikacin                                          | 4                     | 32   | 0.5->32     | 77.1        |
|                                              | Colistin (n=54) <sup>d</sup>                      | 0.5                   | 1    | 0.25->4     | 96.3        |
|                                              | Tigecycline                                       | 2                     | 4    | 0.25-8      | 88.6        |
|                                              | Levofloxacin                                      | >4                    | >4   | 0.06->4     | 23.8        |

|                                                     |                                            |                       |      |             |           |
|-----------------------------------------------------|--------------------------------------------|-----------------------|------|-------------|-----------|
| <i>Citrobacter</i> spp. (28) <sup>g</sup>           | Ceftazidime-avibactam                      | 0.5                   | 1    | 0.03–64     | 96.4      |
|                                                     | Ceftazidime                                | 64                    | >128 | 4–>128      | 14.3      |
|                                                     | Cefepime                                   | >16                   | >16  | 1–>16       | 14.3      |
|                                                     | Aztreonam                                  | 64                    | >128 | 16–>128     | 0         |
|                                                     | Piperacillin-tazobactam                    | 128                   | >128 | 2–>128      | 25.0      |
|                                                     | Doripenem                                  | 0.12                  | >4   | 0.03–>4     | 82.1      |
|                                                     | Imipenem                                   | 1                     | 8    | 0.12–>8     | 67.9      |
|                                                     | Meropenem                                  | 0.06                  | 8    | 0.03–>8     | 75.0      |
|                                                     | Amikacin                                   | 8                     | >32  | 1–>32       | 60.7      |
|                                                     | Colistin (n=13) <sup>d</sup>               | 1                     | 1    | 0.25–1      | 100       |
|                                                     | Tigecycline                                | 0.5                   | 2    | 0.25–4      | 96.4      |
|                                                     | Levofloxacin                               | >4                    | >4   | ≤0.03–>4    | 28.6      |
|                                                     | <i>Citrobacter</i> spp., MBL-negative (27) | Ceftazidime-avibactam | 0.5  | 1           | 0.03–4    |
| Ceftazidime                                         |                                            | 64                    | >128 | 4–>128      | 14.8      |
| Cefepime                                            |                                            | >16                   | >16  | 1–>16       | 14.8      |
| Aztreonam                                           |                                            | 64                    | >128 | 16–>128     | 0         |
| Piperacillin-tazobactam                             |                                            | 128                   | >128 | 2–>128      | 25.9      |
| Doripenem                                           |                                            | 0.12                  | 4    | 0.03–>4     | 85.2      |
| Imipenem                                            |                                            | 1                     | 8    | 0.12–>8     | 70.4      |
| Meropenem                                           |                                            | 0.06                  | 8    | 0.03–>8     | 77.8      |
| Amikacin                                            |                                            | 8                     | >32  | 1–>32       | 59.3      |
| Colistin (n=12) <sup>d</sup>                        |                                            | 0.5                   | 1    | 0.25–1      | 100       |
| Tigecycline                                         |                                            | 0.5                   | 2    | 0.25–4      | 96.3      |
| Levofloxacin                                        |                                            | >4                    | >4   | 0.03–>4     | 29.6      |
| Proteaceae (64) <sup>h</sup>                        |                                            | Ceftazidime-avibactam | 0.06 | 0.25        | ≤0.015–64 |
|                                                     | Ceftazidime                                | 2                     | 16   | 0.12–>128   | 81.3      |
|                                                     | Cefepime                                   | >16                   | >16  | 0.25–>16    | 6.3       |
|                                                     | Aztreonam                                  | 8                     | 64   | ≤0.015–>128 | 45.3      |
|                                                     | Piperacillin-tazobactam                    | 1                     | 32   | ≤0.25–>128  | 89.1      |
|                                                     | Doripenem                                  | 0.25                  | 1    | 0.06–>4     | 93.8      |
|                                                     | Imipenem                                   | 4                     | 4    | 0.25–>8     | 12.5      |
|                                                     | Meropenem                                  | 0.12                  | 0.25 | 0.06–8      | 96.9      |
|                                                     | Amikacin                                   | 8                     | >32  | 0.5–>32     | 73.4      |
|                                                     | Colistin (n=44) <sup>d</sup>               | >4                    | >4   | >4–>4       | 0         |
|                                                     | Tigecycline                                | 4                     | 8    | 0.25–>8     | 35.9      |
|                                                     | Levofloxacin                               | >4                    | >4   | 0.12–>4     | 6.3       |
|                                                     | Proteaceae, MBL-negative (63)              | Ceftazidime-avibactam | 0.06 | 0.25        | ≤0.015–2  |
| Ceftazidime                                         |                                            | 2                     | 16   | 0.12–>128   | 82.5      |
| Cefepime                                            |                                            | >16                   | >16  | 0.25–>16    | 6.3       |
| Aztreonam                                           |                                            | 8                     | 64   | ≤0.015–>128 | 44.4      |
| Piperacillin-tazobactam                             |                                            | 1                     | 8    | ≤0.25–>128  | 90.5      |
| Doripenem                                           |                                            | 0.25                  | 1    | 0.06–4      | 95.2      |
| Imipenem                                            |                                            | 4                     | 4    | 0.25–8      | 12.7      |
| Meropenem                                           |                                            | 0.12                  | 0.25 | 0.06–2      | 98.4      |
| Amikacin                                            |                                            | 8                     | >32  | 0.5–>32     | 73.0      |
| Colistin (n=43) <sup>d</sup>                        |                                            | >4                    | >4   | >4–>4       | 0         |
| Tigecycline                                         |                                            | 4                     | 8    | 0.25–>8     | 36.5      |
| Levofloxacin                                        |                                            | >4                    | >4   | 0.12–>4     | 4.8       |
| Other <i>Enterobacteriaceae</i> (28) <sup>e,i</sup> |                                            | Ceftazidime-avibactam | 0.5  | 1           | 0.25–4    |
|                                                     | Ceftazidime                                | 32                    | >128 | 1–>128      | 10.7      |
|                                                     | Cefepime                                   | >16                   | >16  | 0.25–>16    | 7.1       |
|                                                     | Aztreonam                                  | 64                    | >128 | 16–>128     | 0         |
|                                                     | Piperacillin-tazobactam                    | 32                    | >128 | 0.5–>128    | 50.0      |
|                                                     | Doripenem                                  | 0.12                  | >4   | 0.06–>4     | 85.7      |
|                                                     | Imipenem                                   | 1                     | >8   | 0.12–>8     | 82.1      |
|                                                     | Meropenem                                  | 0.12                  | >8   | 0.06–>8     | 85.7      |
|                                                     | Amikacin                                   | 16                    | >32  | 2–>32       | 53.6      |
|                                                     | Colistin (n=22) <sup>d</sup>               | >4                    | >4   | 0.5–>4      | 36.4      |
|                                                     | Tigecycline                                | 1                     | 4    | 0.25–8      | 89.3      |
|                                                     | Levofloxacin                               | 2                     | >4   | 0.12–>4     | 57.1      |



|                                     |                                                    |                       |      |          |          |
|-------------------------------------|----------------------------------------------------|-----------------------|------|----------|----------|
| <i>Pseudomonas aeruginosa</i> (454) | Ceftazidime-avibactam                              | 8                     | 64   | 0.5->128 | 57.1     |
|                                     | Ceftazidime                                        | 64                    | >128 | 2->128   | 17.6     |
|                                     | Cefepime                                           | >16                   | >16  | 0.25->16 | 12.8     |
|                                     | Aztreonam                                          | 32                    | >128 | 2->128   | 6.4      |
|                                     | Piperacillin-tazobactam                            | >128                  | >128 | 2->128   | 9.0      |
|                                     | Doripenem                                          | >4                    | >4   | 0.12->4  | 9.3      |
|                                     | Imipenem                                           | >8                    | >8   | 1->8     | 12.3     |
|                                     | Meropenem                                          | >8                    | >8   | ≤0.06->8 | 8.2      |
|                                     | Amikacin                                           | >32                   | >32  | 0.5->32  | 41.9     |
|                                     | Colistin (n=336) <sup>d</sup>                      | 2                     | 2    | 0.25-8   | 94.9     |
|                                     | Levofloxacin                                       | >4                    | >4   | 0.25->4  | 11.0     |
|                                     | <i>Pseudomonas aeruginosa</i> , MBL-negative (368) | Ceftazidime-avibactam | 8    | 32       | 0.5->128 |
| Ceftazidime                         |                                                    | 64                    | >128 | 2->128   | 21.7     |
| Cefepime                            |                                                    | >16                   | >16  | 0.25->16 | 15.2     |
| Aztreonam                           |                                                    | 64                    | >128 | 4->128   | 4.4      |
| Piperacillin-tazobactam             |                                                    | >128                  | >128 | 2->128   | 10.3     |
| Doripenem                           |                                                    | >4                    | >4   | 0.12->4  | 11.4     |
| Imipenem                            |                                                    | >8                    | >8   | 1->8     | 15.2     |
| Meropenem                           |                                                    | >8                    | >8   | ≤0.06->8 | 10.1     |
| Amikacin                            |                                                    | 16                    | >32  | 0.5->32  | 50.0     |
| Colistin (n=266) <sup>d</sup>       |                                                    | 2                     | 2    | 0.25-8   | 94.7     |
| Levofloxacin                        |                                                    | >4                    | >4   | 0.25->4  | 11.4     |

508 <sup>a</sup> MBL-negative, no gene encoding a metallo-β-lactamase was detected by polymerase chain reaction assay.

509 <sup>b</sup> —, MIC<sub>50</sub> and MIC<sub>90</sub> were not calculated for n <10 isolates.

510 <sup>c</sup> % Susceptibility was determined according to CLSI 2016 breakpoints with the exception of ceftazidime-avibactam  
511 and tigecycline where US FDA breakpoints were applied and colistin where EUCAST breakpoints were applied.

512 <sup>d</sup> Values are for colistin tested without 0.002% polysorbate-80; isolates collected in 2014-2015 only.

513 <sup>e</sup> All isolates were MBL-negative.

514 <sup>f</sup> *Enterobacter* spp. included *Enterobacter aerogenes* (n=11), *Enterobacter cloacae* (n=92), and *Enterobacter kobei*  
515 (n=3).

516 <sup>g</sup> *Citrobacter* spp. included *Citrobacter braakii* (n=1), *Citrobacter freundii* (n=26), and *Citrobacter koseri* (n=1).

517 <sup>h</sup> Proteaceae included *Morganella morganii* (n=10), *Proteus mirabilis* (n=48), *Providencia rettgeri* (n=2), and  
518 *Providencia stuartii* (n=4).

519 <sup>i</sup> Other *Enterobacteriaceae* included *Raoultella ornithinolytica* (n=7) and *Serratia marcescens* (n=21).
